# Supplementary material for: Large magnetic exchange coupling in rhombus-shaped nanographenes with zigzag periphery
Source: Springer Nature journal article supplement (doi:10.1038/s41557-021-00678-2), 2021-05-10
Supplement: 41557_2021_678_MOESM8_ESM.cif [file 41557_2021_678_MOESM8_ESM.cif]

 
data_4
 
_audit_creation_method            'SHELXL-2018/1'
_shelx_SHELXL_version_number      '2018/1'
_chemical_name_systematic         
;
6,13-bis{10-(2,6-dimethylphenyl)anthracen-9-yl}-1,4,8,11-tetramethylpentacene
;
_chemical_name_common             ?
_chemical_melting_point           ?
_chemical_formula_moiety          'C70 H54, C6 H4 Cl2'
_chemical_formula_sum              'C76 H58 Cl2' 
_chemical_formula_weight          1042.12

loop_
 _atom_type_symbol
 _atom_type_description
 _atom_type_scat_dispersion_real
 _atom_type_scat_dispersion_imag
 _atom_type_scat_source
 'C'  'C'   0.0181   0.0091
 'International Tables Vol C Tables 4.2.6.8 and 6.1.1.4'
 'H'  'H'   0.0000   0.0000
 'International Tables Vol C Tables 4.2.6.8 and 6.1.1.4'
 'Cl'  'Cl'   0.3639   0.7018
 'International Tables Vol C Tables 4.2.6.8 and 6.1.1.4'
 
_space_group_crystal_system       triclinic
_space_group_IT_number            2
_space_group_name_H-M_alt         'P -1'
_space_group_name_Hall            '-P 1'
 
_shelx_space_group_comment
;
The symmetry employed for this shelxl refinement is uniquely defined
by the following loop, which should always be used as a source of
symmetry information in preference to the above space-group names.
They are only intended as comments.
;
 
loop_
 _space_group_symop_operation_xyz
 'x, y, z'
 '-x, -y, -z'
 
_cell_length_a                    10.4168(11)
_cell_length_b                    11.0736(11)
_cell_length_c                    12.8739(14)
_cell_angle_alpha                 97.853(8)
_cell_angle_beta                  108.311(8)
_cell_angle_gamma                 92.478(8)
_cell_volume                      1390.7(3)
_cell_formula_units_Z             1
_cell_measurement_temperature     120(2)
_cell_measurement_reflns_used    9347
_cell_measurement_theta_min      3.66
_cell_measurement_theta_max      66.33
 
_exptl_crystal_description       'plate'
_exptl_crystal_colour            'brown'
_exptl_crystal_density_diffrn     1.244          
_exptl_crystal_F_000              548
_exptl_transmission_factor_min    ?
_exptl_transmission_factor_max    ?
_exptl_crystal_size_max           0.080
_exptl_crystal_size_mid           0.050
_exptl_crystal_size_min           0.030
_exptl_absorpt_coefficient_mu     1.391
_shelx_estimated_absorpt_T_min    0.897
_shelx_estimated_absorpt_T_max    0.959
_exptl_absorpt_correction_type   integration
_exptl_absorpt_correction_T_min  0.9621
_exptl_absorpt_correction_T_max  0.9863
loop_
    _exptl_crystal_face_index_h   
    _exptl_crystal_face_index_k   
    _exptl_crystal_face_index_l
    _exptl_crystal_face_perp_dist
   0   0  -1  0.0150
   0   0   1  0.0150
   1   0   0  0.0260
  -1   0   0  0.0260
   0   2  -1  0.0415
   0  -2   1  0.0415

_exptl_absorpt_process_details    ?
_exptl_absorpt_special_details    ?
_diffrn_ambient_temperature       120(2)
_diffrn_radiation_wavelength      1.54178
_diffrn_radiation_type            CuK\a
_diffrn_measurement_device         '2-circle goniometer'
_diffrn_measurement_device_type    'STOE IPDS 2T'
_diffrn_detector                   'image plate (34 cm diameter)'
_diffrn_detector_type              'STOE'
_diffrn_detector_area_resol_mean   6.67
_diffrn_source           'Incoatec microSource Cu'
_diffrn_radiation_monochromator    'X-ray mirror'
_diffrn_measurement_method         'rotation method'
_diffrn_measurement_details
; 1186 frames, detector distance = 40 mm
;
_diffrn_reflns_number             19029
_diffrn_reflns_av_unetI/netI      0.1579
_diffrn_reflns_av_R_equivalents   0.2244
_diffrn_reflns_limit_h_min        -12
_diffrn_reflns_limit_h_max        12
_diffrn_reflns_limit_k_min        -13
_diffrn_reflns_limit_k_max        13
_diffrn_reflns_limit_l_min        -14
_diffrn_reflns_limit_l_max        14
_diffrn_reflns_theta_min          3.663
_diffrn_reflns_theta_max          67.944
_diffrn_reflns_theta_full         67.679
_diffrn_measured_fraction_theta_max   0.948
_diffrn_measured_fraction_theta_full  0.949
_diffrn_reflns_Laue_measured_fraction_max    0.948
_diffrn_reflns_Laue_measured_fraction_full   0.949
_diffrn_reflns_point_group_measured_fraction_max   0.948
_diffrn_reflns_point_group_measured_fraction_full  0.949
_reflns_number_total              4797
_reflns_number_gt                 2063
_reflns_threshold_expression      'I > 2\s(I)'
_reflns_Friedel_coverage          0.000
_reflns_Friedel_fraction_max      .
_reflns_Friedel_fraction_full     .
 
_reflns_special_details
;
 Reflections were merged by SHELXL according to the crystal
 class for the calculation of statistics and refinement.
 
 _reflns_Friedel_fraction is defined as the number of unique
 Friedel pairs measured divided by the number that would be
 possible theoretically, ignoring centric projections and
 systematic absences.
;
 
_computing_data_collection       'STOE X-AREA'
_computing_cell_refinement       'STOE X-AREA'
_computing_data_reduction        'STOE X-RED'
_computing_structure_solution     'SIR-2004'
_computing_structure_refinement 'SHELXL-2018/1 (Sheldrick, 2018)'
_computing_molecular_graphics     ?
_computing_publication_material   ?
_refine_special_details           ?
_refine_ls_structure_factor_coef  Fsqd
_refine_ls_matrix_type            full
_refine_ls_weighting_scheme       calc
_refine_ls_weighting_details
'w=1/[\s^2^(Fo^2^)+(0.0959P)^2^+4.2135P] where P=(Fo^2^+2Fc^2^)/3'
_atom_sites_solution_primary      ?
_atom_sites_solution_secondary    ?
_atom_sites_solution_hydrogens    mixed
_refine_ls_hydrogen_treatment     constr
_refine_ls_extinction_method      'SHELXL-2018/1 (Sheldrick 2018)'
_refine_ls_extinction_coef        0.0069(11)
_refine_ls_extinction_expression
 'Fc^*^=kFc[1+0.001xFc^2^\l^3^/sin(2\q)]^-1/4^'
_refine_ls_number_reflns          4797
_refine_ls_number_parameters      360
_refine_ls_number_restraints      0
_refine_ls_R_factor_all           0.2343
_refine_ls_R_factor_gt            0.1022
_refine_ls_wR_factor_ref          0.3200
_refine_ls_wR_factor_gt           0.2219
_refine_ls_goodness_of_fit_ref    1.080
_refine_ls_restrained_S_all       1.080
_refine_ls_shift/su_max           0.000
_refine_ls_shift/su_mean          0.000
 
loop_
 _atom_site_label
 _atom_site_type_symbol
 _atom_site_fract_x
 _atom_site_fract_y
 _atom_site_fract_z
 _atom_site_U_iso_or_equiv
 _atom_site_adp_type
 _atom_site_occupancy
 _atom_site_site_symmetry_order  
 _atom_site_calc_flag
 _atom_site_refinement_flags_posn
 _atom_site_refinement_flags_adp
 _atom_site_refinement_flags_occupancy
 _atom_site_disorder_assembly
 _atom_site_disorder_group
C1 C 0.8755(7) 0.4264(6) 0.4404(5) 0.0318(16) Uani 1 1 d . . . . .
C2 C 0.9753(6) 0.3818(6) 0.5249(5) 0.0291(15) Uani 1 1 d . . . . .
C3 C 0.9587(7) 0.2645(6) 0.5534(6) 0.0346(17) Uani 1 1 d . . . . .
H3 H 0.878142 0.213522 0.512113 0.042 Uiso 1 1 calc R U . . .
C4 C 1.0520(7) 0.2205(6) 0.6367(6) 0.0323(16) Uani 1 1 d . . . . .
C5 C 1.0305(7) 0.1006(6) 0.6657(6) 0.0338(16) Uani 1 1 d . . . . .
C6 C 1.1260(7) 0.0661(7) 0.7520(6) 0.0409(18) Uani 1 1 d . . . . .
H6 H 1.111462 -0.012160 0.771015 0.049 Uiso 1 1 calc R U . . .
C7 C 1.2473(8) 0.1408(7) 0.8162(7) 0.048(2) Uani 1 1 d . . . . .
H7 H 1.310265 0.112508 0.876881 0.057 Uiso 1 1 calc R U . . .
C8 C 1.2731(7) 0.2527(6) 0.7907(6) 0.0369(17) Uani 1 1 d . . . . .
C9 C 1.1778(7) 0.2962(6) 0.7005(6) 0.0342(17) Uani 1 1 d . . . . .
C10 C 1.1987(7) 0.4085(6) 0.6701(5) 0.0327(16) Uani 1 1 d . . . . .
H10 H 1.283281 0.455114 0.707803 0.039 Uiso 1 1 d R U . . .
C11 C 0.8990(7) 0.5444(6) 0.4153(6) 0.0327(16) Uani 1 1 d . . . . .
C23 C 0.9037(7) 0.0187(6) 0.5992(6) 0.0435(19) Uani 1 1 d . . . . .
H23A H 0.901471 -0.055707 0.632249 0.065 Uiso 1 1 calc R U . . .
H23B H 0.903567 -0.003470 0.522810 0.065 Uiso 1 1 calc R U . . .
H23C H 0.823664 0.061975 0.599343 0.065 Uiso 1 1 calc R U . . .
C24 C 1.4041(7) 0.3297(7) 0.8573(6) 0.045(2) Uani 1 1 d . . . . .
H24A H 1.458890 0.284856 0.913516 0.067 Uiso 1 1 calc R U . . .
H24B H 1.383364 0.406587 0.893628 0.067 Uiso 1 1 calc R U . . .
H24C H 1.454767 0.347631 0.807817 0.067 Uiso 1 1 calc R U . . .
C27 C 0.7453(6) 0.3496(6) 0.3814(5) 0.0295(15) Uani 1 1 d . . . . .
C28 C 0.6474(6) 0.3431(6) 0.4347(6) 0.0319(16) Uani 1 1 d . . . . .
C29 C 0.6633(7) 0.4105(6) 0.5418(6) 0.0364(17) Uani 1 1 d . . . . .
H29 H 0.744106 0.463009 0.578767 0.044 Uiso 1 1 calc R U . . .
C30 C 0.5683(7) 0.4027(6) 0.5925(6) 0.0381(17) Uani 1 1 d . . . . .
H30 H 0.582400 0.449899 0.663169 0.046 Uiso 1 1 calc R U . . .
C31 C 0.4463(7) 0.3233(6) 0.5395(6) 0.0394(18) Uani 1 1 d . . . . .
H31 H 0.379710 0.317324 0.575181 0.047 Uiso 1 1 calc R U . . .
C32 C 0.4259(7) 0.2562(6) 0.4375(6) 0.0385(18) Uani 1 1 d . . . . .
H32 H 0.344737 0.203517 0.403084 0.046 Uiso 1 1 calc R U . . .
C33 C 0.5230(6) 0.2636(5) 0.3821(6) 0.0298(16) Uani 1 1 d . . . . .
C34 C 0.5041(6) 0.1938(6) 0.2773(6) 0.0309(16) Uani 1 1 d . . . . .
C35 C 0.5993(7) 0.2040(6) 0.2227(6) 0.0330(16) Uani 1 1 d . . . . .
C36 C 0.5808(7) 0.1382(6) 0.1145(6) 0.0375(18) Uani 1 1 d . . . . .
H36 H 0.499517 0.086598 0.077116 0.045 Uiso 1 1 calc R U . . .
C37 C 0.6765(7) 0.1475(6) 0.0638(6) 0.0369(17) Uani 1 1 d . . . . .
H37 H 0.660989 0.103079 -0.008189 0.044 Uiso 1 1 calc R U . . .
C38 C 0.7980(7) 0.2222(6) 0.1171(6) 0.0388(18) Uani 1 1 d . . . . .
H38 H 0.863835 0.227785 0.080594 0.047 Uiso 1 1 calc R U . . .
C39 C 0.8231(7) 0.2869(6) 0.2202(6) 0.0361(17) Uani 1 1 d . . . . .
H39 H 0.906976 0.335497 0.255400 0.043 Uiso 1 1 calc R U . . .
C40 C 0.7237(6) 0.2823(6) 0.2765(6) 0.0324(16) Uani 1 1 d . . . . .
C41 C 0.3824(7) 0.1017(6) 0.2289(6) 0.0353(17) Uani 1 1 d . . . . .
C42 C 0.2601(7) 0.1337(7) 0.1590(6) 0.0433(19) Uani 1 1 d . . . . .
C43 C 0.1479(8) 0.0452(7) 0.1188(7) 0.055(2) Uani 1 1 d . . . . .
H43 H 0.063569 0.065232 0.072275 0.066 Uiso 1 1 calc R U . . .
C44 C 0.1602(9) -0.0710(8) 0.1469(7) 0.059(3) Uani 1 1 d . . . . .
H44 H 0.083894 -0.130304 0.119486 0.071 Uiso 1 1 calc R U . . .
C45 C 0.2814(9) -0.1015(7) 0.2141(7) 0.051(2) Uani 1 1 d . . . . .
H45 H 0.287901 -0.182505 0.230625 0.061 Uiso 1 1 calc R U . . .
C46 C 0.3945(7) -0.0171(6) 0.2584(6) 0.0389(18) Uani 1 1 d . . . . .
C47 C 0.2468(9) 0.2589(7) 0.1290(8) 0.061(3) Uani 1 1 d . . . . .
H47A H 0.312685 0.276698 0.091796 0.092 Uiso 1 1 calc R U . . .
H47B H 0.264117 0.319014 0.196289 0.092 Uiso 1 1 calc R U . . .
H47C H 0.154675 0.263265 0.079090 0.092 Uiso 1 1 calc R U . . .
C48 C 0.5240(8) -0.0471(7) 0.3362(7) 0.056(2) Uani 1 1 d . . . . .
H48A H 0.599052 -0.027301 0.308974 0.084 Uiso 1 1 calc R U . . .
H48B H 0.518095 -0.134604 0.341106 0.084 Uiso 1 1 calc R U . . .
H48C H 0.540116 0.000784 0.409683 0.084 Uiso 1 1 calc R U . . .
Cl1A Cl -0.2714(13) 0.4460(11) -0.0629(10) 0.047(4) Uiso 0.275 1 d . . P A -1
Cl2A Cl -0.0710(11) 0.4036(10) -0.2023(10) 0.046(3) Uiso 0.275 1 d . . P A -1
C1A C 0.113(3) 0.514(3) -0.018(2) 0.036(16) Uiso 0.275 1 d G . P A -1
H1A H 0.171725 0.501748 -0.061003 0.043 Uiso 0.275 1 calc R U P A -1
C2A C 0.165(2) 0.569(3) 0.093(2) 0.039(8) Uiso 0.275 1 d G . P A -1
H2A H 0.259300 0.595283 0.124378 0.046 Uiso 0.275 1 calc R U P A -1
C3A C 0.080(2) 0.587(2) 0.1560(17) 0.045(5) Uiso 0.275 1 d G . P A -1
H3A H 0.115103 0.624832 0.231277 0.053 Uiso 0.275 1 calc R U P A -1
C4A C -0.058(2) 0.549(2) 0.1094(19) 0.034(7) Uiso 0.275 1 d G . P A -1
H4A H -0.116669 0.560846 0.152795 0.041 Uiso 0.275 1 calc R U P A -1
C5A C -0.110(2) 0.493(3) -0.001(2) 0.027(11) Uiso 0.275 1 d G . P A -1
C6A C -0.024(3) 0.476(3) -0.0642(18) 0.044(13) Uiso 0.275 1 d G . P A -1
Cl1B Cl -0.2626(15) 0.4379(14) -0.0426(12) 0.046(5) Uiso 0.225 1 d . . P B -2
Cl2B Cl -0.0945(13) 0.4241(12) -0.2071(12) 0.046(4) Uiso 0.225 1 d . . P B -2
C1B C 0.132(3) 0.513(3) -0.029(2) 0.037(13) Uiso 0.225 1 d G . P B -2
H1B H 0.184785 0.505947 -0.077191 0.044 Uiso 0.225 1 calc R U P B -2
C2B C 0.191(2) 0.565(3) 0.081(2) 0.044(12) Uiso 0.225 1 d G . P B -2
H2B H 0.284271 0.593966 0.108852 0.052 Uiso 0.225 1 calc R U P B -2
C3B C 0.113(3) 0.575(3) 0.1519(19) 0.045(5) Uiso 0.225 1 d G . P B -2
H3B H 0.153428 0.610539 0.227458 0.053 Uiso 0.225 1 calc R U P B -2
C4B C -0.024(3) 0.532(3) 0.112(2) 0.025(8) Uiso 0.225 1 d G . P B -2
H4B H -0.076902 0.539095 0.160021 0.030 Uiso 0.225 1 calc R U P B -2
C5B C -0.083(2) 0.480(3) 0.001(2) 0.048(12) Uiso 0.225 1 d G . P B -2
C6B C -0.005(3) 0.470(3) -0.0691(18) 0.025(12) Uiso 0.225 1 d G . P B -2
 
loop_
 _atom_site_aniso_label
 _atom_site_aniso_U_11
 _atom_site_aniso_U_22
 _atom_site_aniso_U_33
 _atom_site_aniso_U_23
 _atom_site_aniso_U_13
 _atom_site_aniso_U_12
C1 0.035(4) 0.030(3) 0.026(4) 0.000(3) 0.006(3) -0.008(3)
C2 0.028(3) 0.032(3) 0.025(4) 0.003(3) 0.007(3) -0.005(3)
C3 0.035(4) 0.025(3) 0.033(4) -0.005(3) 0.001(3) -0.008(3)
C4 0.036(4) 0.032(3) 0.029(4) -0.001(3) 0.013(3) -0.002(3)
C5 0.035(4) 0.023(3) 0.039(4) 0.001(3) 0.009(3) -0.004(3)
C6 0.046(4) 0.042(4) 0.035(4) 0.009(3) 0.012(4) 0.002(3)
C7 0.038(4) 0.045(4) 0.061(6) 0.015(4) 0.015(4) 0.003(3)
C8 0.036(4) 0.036(4) 0.035(4) 0.006(3) 0.007(3) 0.002(3)
C9 0.029(4) 0.029(3) 0.040(4) 0.005(3) 0.005(3) -0.004(3)
C10 0.035(4) 0.031(3) 0.029(4) 0.000(3) 0.009(3) -0.001(3)
C11 0.033(4) 0.027(3) 0.033(4) 0.003(3) 0.004(3) -0.002(3)
C23 0.048(4) 0.032(4) 0.051(5) 0.003(3) 0.019(4) -0.005(3)
C24 0.028(4) 0.050(4) 0.045(5) 0.006(4) -0.003(3) 0.001(3)
C27 0.030(4) 0.023(3) 0.028(4) -0.002(3) 0.003(3) -0.004(3)
C28 0.025(3) 0.028(3) 0.035(4) -0.001(3) 0.003(3) -0.001(3)
C29 0.038(4) 0.030(3) 0.034(4) -0.003(3) 0.006(3) -0.001(3)
C30 0.044(4) 0.036(4) 0.034(4) -0.001(3) 0.017(3) -0.001(3)
C31 0.037(4) 0.041(4) 0.041(5) 0.004(4) 0.016(3) -0.004(3)
C32 0.032(4) 0.035(4) 0.049(5) 0.008(4) 0.014(3) 0.000(3)
C33 0.029(3) 0.024(3) 0.030(4) 0.004(3) 0.002(3) -0.004(3)
C34 0.029(4) 0.026(3) 0.032(4) 0.001(3) 0.005(3) -0.004(3)
C35 0.035(4) 0.029(3) 0.033(4) 0.005(3) 0.010(3) -0.007(3)
C36 0.038(4) 0.027(3) 0.034(4) -0.005(3) -0.002(3) -0.008(3)
C37 0.041(4) 0.034(4) 0.031(4) -0.002(3) 0.010(3) -0.001(3)
C38 0.047(4) 0.033(4) 0.032(4) 0.001(3) 0.009(3) -0.006(3)
C39 0.031(4) 0.033(4) 0.036(4) 0.000(3) 0.002(3) -0.010(3)
C40 0.025(3) 0.030(3) 0.038(4) -0.001(3) 0.009(3) -0.006(3)
C41 0.031(4) 0.028(3) 0.036(4) -0.003(3) 0.000(3) -0.009(3)
C42 0.035(4) 0.040(4) 0.045(5) -0.002(4) 0.003(4) -0.007(3)
C43 0.033(4) 0.053(5) 0.066(6) -0.014(4) 0.009(4) -0.017(4)
C44 0.053(5) 0.058(5) 0.056(6) -0.021(5) 0.020(5) -0.024(4)
C45 0.066(6) 0.032(4) 0.051(5) -0.013(4) 0.026(5) -0.023(4)
C46 0.048(4) 0.030(4) 0.034(4) -0.006(3) 0.012(3) -0.012(3)
C47 0.054(5) 0.045(5) 0.069(6) 0.002(4) -0.001(5) 0.003(4)
C48 0.070(6) 0.035(4) 0.066(6) 0.016(4) 0.023(5) 0.010(4)
 
_geom_special_details
;
 All esds (except the esd in the dihedral angle between two l.s. planes)
 are estimated using the full covariance matrix.  The cell esds are taken
 into account individually in the estimation of esds in distances, angles
 and torsion angles; correlations between esds in cell parameters are only
 used when they are defined by crystal symmetry.  An approximate (isotropic)
 treatment of cell esds is used for estimating esds involving l.s. planes.
;
 
loop_
 _geom_bond_atom_site_label_1
 _geom_bond_atom_site_label_2
 _geom_bond_distance
 _geom_bond_site_symmetry_2
 _geom_bond_publ_flag
C1 C2 1.410(9) . ?
C1 C11 1.418(9) . ?
C1 C27 1.488(8) . ?
C2 C3 1.414(9) . ?
C2 C11 1.442(8) 2_766 ?
C3 C4 1.365(9) . ?
C3 H3 0.9500 . ?
C4 C5 1.454(9) . ?
C4 C9 1.461(9) . ?
C5 C6 1.351(9) . ?
C5 C23 1.508(9) . ?
C6 C7 1.425(10) . ?
C6 H6 0.9500 . ?
C7 C8 1.361(10) . ?
C7 H7 0.9500 . ?
C8 C9 1.427(9) . ?
C8 C24 1.512(9) . ?
C9 C10 1.382(9) . ?
C10 C11 1.420(9) 2_766 ?
C10 H10 0.9496 . ?
C23 H23A 0.9800 . ?
C23 H23B 0.9800 . ?
C23 H23C 0.9800 . ?
C24 H24A 0.9800 . ?
C24 H24B 0.9800 . ?
C24 H24C 0.9800 . ?
C27 C40 1.396(9) . ?
C27 C28 1.402(9) . ?
C28 C29 1.432(10) . ?
C28 C33 1.449(8) . ?
C29 C30 1.352(10) . ?
C29 H29 0.9500 . ?
C30 C31 1.430(9) . ?
C30 H30 0.9500 . ?
C31 C32 1.366(10) . ?
C31 H31 0.9500 . ?
C32 C33 1.415(10) . ?
C32 H32 0.9500 . ?
C33 C34 1.411(9) . ?
C34 C35 1.393(9) . ?
C34 C41 1.501(8) . ?
C35 C36 1.433(10) . ?
C35 C40 1.444(8) . ?
C36 C37 1.359(10) . ?
C36 H36 0.9500 . ?
C37 C38 1.402(9) . ?
C37 H37 0.9500 . ?
C38 C39 1.359(10) . ?
C38 H38 0.9500 . ?
C39 C40 1.441(9) . ?
C39 H39 0.9500 . ?
C41 C42 1.401(10) . ?
C41 C46 1.418(9) . ?
C42 C43 1.406(9) . ?
C42 C47 1.490(10) . ?
C43 C44 1.384(12) . ?
C43 H43 0.9500 . ?
C44 C45 1.374(12) . ?
C44 H44 0.9500 . ?
C45 C46 1.387(9) . ?
C45 H45 0.9500 . ?
C46 C48 1.488(10) . ?
C47 H47A 0.9800 . ?
C47 H47B 0.9800 . ?
C47 H47C 0.9800 . ?
C48 H48A 0.9800 . ?
C48 H48B 0.9800 . ?
C48 H48C 0.9800 . ?
Cl1A C5A 1.64(2) . ?
Cl2A C6A 1.75(2) . ?
C1A C2A 1.3900 . ?
C1A C6A 1.3900 . ?
C1A H1A 0.9500 . ?
C2A C3A 1.3900 . ?
C2A H2A 0.9500 . ?
C3A C4A 1.3900 . ?
C3A H3A 0.9500 . ?
C4A C5A 1.3900 . ?
C4A H4A 0.9500 . ?
C5A C6A 1.3900 . ?
Cl1B C5B 1.80(3) . ?
Cl2B C6B 1.72(3) . ?
C1B C2B 1.3900 . ?
C1B C6B 1.3900 . ?
C1B H1B 0.9500 . ?
C2B C3B 1.3900 . ?
C2B H2B 0.9500 . ?
C3B C4B 1.3900 . ?
C3B H3B 0.9500 . ?
C4B C5B 1.3900 . ?
C4B H4B 0.9500 . ?
C5B C6B 1.3900 . ?
 
loop_
 _geom_angle_atom_site_label_1
 _geom_angle_atom_site_label_2
 _geom_angle_atom_site_label_3
 _geom_angle
 _geom_angle_site_symmetry_1
 _geom_angle_site_symmetry_3
 _geom_angle_publ_flag
C2 C1 C11 119.7(6) . . ?
C2 C1 C27 119.1(6) . . ?
C11 C1 C27 121.2(6) . . ?
C1 C2 C3 122.5(6) . . ?
C1 C2 C11 120.1(6) . 2_766 ?
C3 C2 C11 117.4(6) . 2_766 ?
C4 C3 C2 123.7(6) . . ?
C4 C3 H3 118.1 . . ?
C2 C3 H3 118.1 . . ?
C3 C4 C5 122.4(6) . . ?
C3 C4 C9 119.4(6) . . ?
C5 C4 C9 118.3(6) . . ?
C6 C5 C4 118.4(6) . . ?
C6 C5 C23 122.0(6) . . ?
C4 C5 C23 119.6(6) . . ?
C5 C6 C7 123.4(7) . . ?
C5 C6 H6 118.3 . . ?
C7 C6 H6 118.3 . . ?
C8 C7 C6 120.2(7) . . ?
C8 C7 H7 119.9 . . ?
C6 C7 H7 119.9 . . ?
C7 C8 C9 120.0(7) . . ?
C7 C8 C24 119.7(7) . . ?
C9 C8 C24 120.3(6) . . ?
C10 C9 C8 122.7(6) . . ?
C10 C9 C4 117.7(6) . . ?
C8 C9 C4 119.6(6) . . ?
C9 C10 C11 123.1(6) . 2_766 ?
C9 C10 H10 117.8 . . ?
C11 C10 H10 119.1 2_766 . ?
C1 C11 C10 121.1(6) . 2_766 ?
C1 C11 C2 120.2(6) . 2_766 ?
C10 C11 C2 118.6(6) 2_766 2_766 ?
C5 C23 H23A 109.5 . . ?
C5 C23 H23B 109.5 . . ?
H23A C23 H23B 109.5 . . ?
C5 C23 H23C 109.5 . . ?
H23A C23 H23C 109.5 . . ?
H23B C23 H23C 109.5 . . ?
C8 C24 H24A 109.5 . . ?
C8 C24 H24B 109.5 . . ?
H24A C24 H24B 109.5 . . ?
C8 C24 H24C 109.5 . . ?
H24A C24 H24C 109.5 . . ?
H24B C24 H24C 109.5 . . ?
C40 C27 C28 120.9(6) . . ?
C40 C27 C1 120.3(6) . . ?
C28 C27 C1 118.7(6) . . ?
C27 C28 C29 123.4(6) . . ?
C27 C28 C33 120.0(6) . . ?
C29 C28 C33 116.6(6) . . ?
C30 C29 C28 122.7(6) . . ?
C30 C29 H29 118.6 . . ?
C28 C29 H29 118.6 . . ?
C29 C30 C31 119.9(7) . . ?
C29 C30 H30 120.0 . . ?
C31 C30 H30 120.0 . . ?
C32 C31 C30 119.9(7) . . ?
C32 C31 H31 120.0 . . ?
C30 C31 H31 120.0 . . ?
C31 C32 C33 121.3(6) . . ?
C31 C32 H32 119.3 . . ?
C33 C32 H32 119.3 . . ?
C34 C33 C32 122.0(6) . . ?
C34 C33 C28 118.5(6) . . ?
C32 C33 C28 119.5(6) . . ?
C35 C34 C33 121.3(6) . . ?
C35 C34 C41 120.4(6) . . ?
C33 C34 C41 118.1(6) . . ?
C34 C35 C36 122.8(6) . . ?
C34 C35 C40 119.7(6) . . ?
C36 C35 C40 117.5(6) . . ?
C37 C36 C35 121.8(6) . . ?
C37 C36 H36 119.1 . . ?
C35 C36 H36 119.1 . . ?
C36 C37 C38 120.5(7) . . ?
C36 C37 H37 119.8 . . ?
C38 C37 H37 119.8 . . ?
C39 C38 C37 121.1(7) . . ?
C39 C38 H38 119.4 . . ?
C37 C38 H38 119.4 . . ?
C38 C39 C40 120.6(6) . . ?
C38 C39 H39 119.7 . . ?
C40 C39 H39 119.7 . . ?
C27 C40 C39 122.0(6) . . ?
C27 C40 C35 119.5(6) . . ?
C39 C40 C35 118.5(6) . . ?
C42 C41 C46 121.4(6) . . ?
C42 C41 C34 120.7(6) . . ?
C46 C41 C34 117.9(6) . . ?
C41 C42 C43 118.4(7) . . ?
C41 C42 C47 121.5(6) . . ?
C43 C42 C47 120.1(7) . . ?
C44 C43 C42 120.1(8) . . ?
C44 C43 H43 119.9 . . ?
C42 C43 H43 119.9 . . ?
C45 C44 C43 120.7(7) . . ?
C45 C44 H44 119.6 . . ?
C43 C44 H44 119.6 . . ?
C44 C45 C46 121.7(8) . . ?
C44 C45 H45 119.2 . . ?
C46 C45 H45 119.2 . . ?
C45 C46 C41 117.6(7) . . ?
C45 C46 C48 122.1(7) . . ?
C41 C46 C48 120.2(6) . . ?
C42 C47 H47A 109.5 . . ?
C42 C47 H47B 109.5 . . ?
H47A C47 H47B 109.5 . . ?
C42 C47 H47C 109.5 . . ?
H47A C47 H47C 109.5 . . ?
H47B C47 H47C 109.5 . . ?
C46 C48 H48A 109.5 . . ?
C46 C48 H48B 109.5 . . ?
H48A C48 H48B 109.5 . . ?
C46 C48 H48C 109.5 . . ?
H48A C48 H48C 109.5 . . ?
H48B C48 H48C 109.5 . . ?
C2A C1A C6A 120.0 . . ?
C2A C1A H1A 120.0 . . ?
C6A C1A H1A 120.0 . . ?
C3A C2A C1A 120.0 . . ?
C3A C2A H2A 120.0 . . ?
C1A C2A H2A 120.0 . . ?
C2A C3A C4A 120.0 . . ?
C2A C3A H3A 120.0 . . ?
C4A C3A H3A 120.0 . . ?
C3A C4A C5A 120.0 . . ?
C3A C4A H4A 120.0 . . ?
C5A C4A H4A 120.0 . . ?
C6A C5A C4A 120.0 . . ?
C6A C5A Cl1A 116.6(15) . . ?
C4A C5A Cl1A 123.4(15) . . ?
C5A C6A C1A 120.0 . . ?
C5A C6A Cl2A 126.3(16) . . ?
C1A C6A Cl2A 113.7(16) . . ?
C2B C1B C6B 120.0 . . ?
C2B C1B H1B 120.0 . . ?
C6B C1B H1B 120.0 . . ?
C1B C2B C3B 120.0 . . ?
C1B C2B H2B 120.0 . . ?
C3B C2B H2B 120.0 . . ?
C2B C3B C4B 120.0 . . ?
C2B C3B H3B 120.0 . . ?
C4B C3B H3B 120.0 . . ?
C5B C4B C3B 120.0 . . ?
C5B C4B H4B 120.0 . . ?
C3B C4B H4B 120.0 . . ?
C6B C5B C4B 120.0 . . ?
C6B C5B Cl1B 124.1(15) . . ?
C4B C5B Cl1B 115.8(15) . . ?
C5B C6B C1B 120.0 . . ?
C5B C6B Cl2B 115.4(17) . . ?
C1B C6B Cl2B 124.0(16) . . ?
 
loop_
 _geom_torsion_atom_site_label_1
 _geom_torsion_atom_site_label_2
 _geom_torsion_atom_site_label_3
 _geom_torsion_atom_site_label_4
 _geom_torsion
 _geom_torsion_site_symmetry_1
 _geom_torsion_site_symmetry_2
 _geom_torsion_site_symmetry_3
 _geom_torsion_site_symmetry_4
 _geom_torsion_publ_flag
C11 C1 C2 C3 -179.4(7) . . . . ?
C27 C1 C2 C3 2.4(11) . . . . ?
C11 C1 C2 C11 -0.5(12) . . . 2_766 ?
C27 C1 C2 C11 -178.7(6) . . . 2_766 ?
C1 C2 C3 C4 -178.1(7) . . . . ?
C11 C2 C3 C4 3.0(11) 2_766 . . . ?
C2 C3 C4 C5 178.5(7) . . . . ?
C2 C3 C4 C9 -0.9(11) . . . . ?
C3 C4 C5 C6 -177.6(7) . . . . ?
C9 C4 C5 C6 1.8(10) . . . . ?
C3 C4 C5 C23 2.4(11) . . . . ?
C9 C4 C5 C23 -178.1(7) . . . . ?
C4 C5 C6 C7 -0.3(12) . . . . ?
C23 C5 C6 C7 179.6(7) . . . . ?
C5 C6 C7 C8 -1.1(13) . . . . ?
C6 C7 C8 C9 0.8(12) . . . . ?
C6 C7 C8 C24 -178.3(7) . . . . ?
C7 C8 C9 C10 -179.6(7) . . . . ?
C24 C8 C9 C10 -0.5(12) . . . . ?
C7 C8 C9 C4 0.7(11) . . . . ?
C24 C8 C9 C4 179.8(7) . . . . ?
C3 C4 C9 C10 -2.3(11) . . . . ?
C5 C4 C9 C10 178.2(7) . . . . ?
C3 C4 C9 C8 177.4(7) . . . . ?
C5 C4 C9 C8 -2.0(10) . . . . ?
C8 C9 C10 C11 -176.2(7) . . . 2_766 ?
C4 C9 C10 C11 3.5(11) . . . 2_766 ?
C2 C1 C11 C10 179.3(7) . . . 2_766 ?
C27 C1 C11 C10 -2.6(11) . . . 2_766 ?
C2 C1 C11 C2 0.5(12) . . . 2_766 ?
C27 C1 C11 C2 178.7(6) . . . 2_766 ?
C2 C1 C27 C40 -101.1(8) . . . . ?
C11 C1 C27 C40 80.7(9) . . . . ?
C2 C1 C27 C28 76.8(9) . . . . ?
C11 C1 C27 C28 -101.4(8) . . . . ?
C40 C27 C28 C29 -179.5(7) . . . . ?
C1 C27 C28 C29 2.7(10) . . . . ?
C40 C27 C28 C33 1.4(10) . . . . ?
C1 C27 C28 C33 -176.4(6) . . . . ?
C27 C28 C29 C30 -179.6(7) . . . . ?
C33 C28 C29 C30 -0.5(10) . . . . ?
C28 C29 C30 C31 0.8(11) . . . . ?
C29 C30 C31 C32 -0.4(11) . . . . ?
C30 C31 C32 C33 -0.2(11) . . . . ?
C31 C32 C33 C34 179.3(7) . . . . ?
C31 C32 C33 C28 0.5(10) . . . . ?
C27 C28 C33 C34 0.2(9) . . . . ?
C29 C28 C33 C34 -178.9(6) . . . . ?
C27 C28 C33 C32 179.0(6) . . . . ?
C29 C28 C33 C32 -0.2(9) . . . . ?
C32 C33 C34 C35 178.6(7) . . . . ?
C28 C33 C34 C35 -2.6(9) . . . . ?
C32 C33 C34 C41 -5.3(9) . . . . ?
C28 C33 C34 C41 173.5(6) . . . . ?
C33 C34 C35 C36 -177.5(7) . . . . ?
C41 C34 C35 C36 6.5(10) . . . . ?
C33 C34 C35 C40 3.4(10) . . . . ?
C41 C34 C35 C40 -172.6(6) . . . . ?
C34 C35 C36 C37 -178.5(7) . . . . ?
C40 C35 C36 C37 0.6(10) . . . . ?
C35 C36 C37 C38 0.4(11) . . . . ?
C36 C37 C38 C39 0.0(11) . . . . ?
C37 C38 C39 C40 -1.4(11) . . . . ?
C28 C27 C40 C39 -179.6(6) . . . . ?
C1 C27 C40 C39 -1.8(10) . . . . ?
C28 C27 C40 C35 -0.6(10) . . . . ?
C1 C27 C40 C35 177.2(6) . . . . ?
C38 C39 C40 C27 -178.7(7) . . . . ?
C38 C39 C40 C35 2.3(10) . . . . ?
C34 C35 C40 C27 -1.8(10) . . . . ?
C36 C35 C40 C27 179.1(6) . . . . ?
C34 C35 C40 C39 177.2(6) . . . . ?
C36 C35 C40 C39 -1.9(9) . . . . ?
C35 C34 C41 C42 -91.9(9) . . . . ?
C33 C34 C41 C42 91.9(9) . . . . ?
C35 C34 C41 C46 89.6(9) . . . . ?
C33 C34 C41 C46 -86.6(8) . . . . ?
C46 C41 C42 C43 0.5(12) . . . . ?
C34 C41 C42 C43 -177.9(7) . . . . ?
C46 C41 C42 C47 179.3(8) . . . . ?
C34 C41 C42 C47 0.9(12) . . . . ?
C41 C42 C43 C44 -1.0(13) . . . . ?
C47 C42 C43 C44 -179.8(8) . . . . ?
C42 C43 C44 C45 0.0(13) . . . . ?
C43 C44 C45 C46 1.6(13) . . . . ?
C44 C45 C46 C41 -2.1(12) . . . . ?
C44 C45 C46 C48 176.5(8) . . . . ?
C42 C41 C46 C45 1.0(12) . . . . ?
C34 C41 C46 C45 179.5(7) . . . . ?
C42 C41 C46 C48 -177.7(7) . . . . ?
C34 C41 C46 C48 0.8(11) . . . . ?
C6A C1A C2A C3A 0.0 . . . . ?
C1A C2A C3A C4A 0.0 . . . . ?
C2A C3A C4A C5A 0.0 . . . . ?
C3A C4A C5A C6A 0.0 . . . . ?
C3A C4A C5A Cl1A -180(2) . . . . ?
C4A C5A C6A C1A 0.0 . . . . ?
Cl1A C5A C6A C1A 180(2) . . . . ?
C4A C5A C6A Cl2A 178(3) . . . . ?
Cl1A C5A C6A Cl2A -2(2) . . . . ?
C2A C1A C6A C5A 0.0 . . . . ?
C2A C1A C6A Cl2A -178(3) . . . . ?
C6B C1B C2B C3B 0.0 . . . . ?
C1B C2B C3B C4B 0.0 . . . . ?
C2B C3B C4B C5B 0.0 . . . . ?
C3B C4B C5B C6B 0.0 . . . . ?
C3B C4B C5B Cl1B -176(3) . . . . ?
C4B C5B C6B C1B 0.0 . . . . ?
Cl1B C5B C6B C1B 176(3) . . . . ?
C4B C5B C6B Cl2B -171(3) . . . . ?
Cl1B C5B C6B Cl2B 4(2) . . . . ?
C2B C1B C6B C5B 0.0 . . . . ?
C2B C1B C6B Cl2B 170(3) . . . . ?
 
_refine_diff_density_max    0.404
_refine_diff_density_min   -0.405
_refine_diff_density_rms    0.097
_vrf_RINTA01_4
;
PROBLEM: The value of Rint is greater than 0.18
RESPONSE: poor crystal quality, weak diffracting crystal
;
_vrf_PLAT020_4
;
PROBLEM: The Value of Rint is Greater Than 0.12 .........      0.224 Report
RESPONSE:  poor crystal quality, weak diffracting crystal
;
_vrf_PLAT029_4
;PROBLEM: _diffrn_measured_fraction_theta_full value Low .      0.949 Why?  
RESPONSE: geometrical limitations of the instrument
;
_vrf_PLAT340_4
;
PROBLEM: Low Bond Precision on  C-C Bonds ...............    0.01027 Ang.  
RESPONSE: see PLAT020_4
;

_shelx_res_file
;
TITL XL107 in P-1 mit Loesungsmittel
    xl107.res
    created by SHELXL-2018/1 at 12:11:40 on 20-Dec-2017
CELL  1.54178   10.4168  11.0736  12.8739   97.853  108.311   92.478
ZERR        1    0.0011   0.0011   0.0014    0.008    0.008    0.008
REM Gitterkonstanten aus 9347 Reflexen mit 3.6-66.3 Grad V=1390.7(2)
REM braune Platte Tmin=0.9621, Tmax=0.9863
LATT   1
SFAC  C  H Cl
UNIT    76   58   2
TEMP  -153
L.S. 5
FMAP 2
PLAN -10 .5 -.5
TEMP -153
ACTA
BOND $H
EADP C3B C3A
CONF
SIZE 0.030  0.050  0.08
WGHT    0.095900    4.213500
EXTI    0.006896
FVAR       0.51475
C1    1    0.875490    0.426381    0.440397    11.00000    0.03467    0.03003 =
         0.02566   -0.00029    0.00617   -0.00827
C2    1    0.975253    0.381772    0.524862    11.00000    0.02797    0.03171 =
         0.02523    0.00277    0.00680   -0.00516
C3    1    0.958730    0.264518    0.553351    11.00000    0.03514    0.02503 =
         0.03266   -0.00461    0.00056   -0.00783
AFIX  43
H3    2    0.878142    0.213522    0.512113    11.00000   -1.20000
AFIX   0
C4    1    1.052017    0.220490    0.636739    11.00000    0.03552    0.03212 =
         0.02866   -0.00102    0.01256   -0.00215
C5    1    1.030531    0.100586    0.665661    11.00000    0.03522    0.02332 =
         0.03909    0.00078    0.00934   -0.00365
C6    1    1.125972    0.066059    0.752037    11.00000    0.04571    0.04217 =
         0.03472    0.00908    0.01205    0.00181
AFIX  43
H6    2    1.111462   -0.012160    0.771015    11.00000   -1.20000
AFIX   0
C7    1    1.247269    0.140835    0.816165    11.00000    0.03802    0.04474 =
         0.06124    0.01463    0.01462    0.00333
AFIX  43
H7    2    1.310265    0.112508    0.876881    11.00000   -1.20000
AFIX   0
C8    1    1.273148    0.252733    0.790690    11.00000    0.03559    0.03647 =
         0.03508    0.00555    0.00655    0.00161
C9    1    1.177823    0.296166    0.700477    11.00000    0.02948    0.02855 =
         0.03969    0.00495    0.00516   -0.00402
C10   1    1.198718    0.408474    0.670133    11.00000    0.03480    0.03137 =
         0.02907   -0.00004    0.00859   -0.00051
AFIX   3
H10   2    1.283281    0.455114    0.707803    11.00000   -1.20000
AFIX   0
C11   1    0.898988    0.544433    0.415312    11.00000    0.03290    0.02715 =
         0.03283    0.00346    0.00445   -0.00175
C23   1    0.903706    0.018676    0.599198    11.00000    0.04753    0.03239 =
         0.05103    0.00296    0.01907   -0.00492
AFIX 137
H23A  2    0.901471   -0.055707    0.632249    11.00000   -1.50000
H23B  2    0.903567   -0.003470    0.522810    11.00000   -1.50000
H23C  2    0.823664    0.061975    0.599343    11.00000   -1.50000
AFIX   0
C24   1    1.404059    0.329725    0.857270    11.00000    0.02829    0.04951 =
         0.04530    0.00627   -0.00276    0.00073
AFIX 137
H24A  2    1.458890    0.284856    0.913516    11.00000   -1.50000
H24B  2    1.383364    0.406587    0.893628    11.00000   -1.50000
H24C  2    1.454767    0.347631    0.807817    11.00000   -1.50000
AFIX   0
C27   1    0.745312    0.349603    0.381381    11.00000    0.03001    0.02309 =
         0.02820   -0.00208    0.00270   -0.00378
C28   1    0.647360    0.343052    0.434704    11.00000    0.02531    0.02826 =
         0.03526   -0.00100    0.00289   -0.00120
C29   1    0.663336    0.410548    0.541786    11.00000    0.03822    0.02999 =
         0.03404   -0.00317    0.00570   -0.00116
AFIX  43
H29   2    0.744106    0.463009    0.578767    11.00000   -1.20000
AFIX   0
C30   1    0.568256    0.402725    0.592454    11.00000    0.04444    0.03645 =
         0.03430   -0.00110    0.01730   -0.00103
AFIX  43
H30   2    0.582400    0.449899    0.663169    11.00000   -1.20000
AFIX   0
C31   1    0.446349    0.323345    0.539474    11.00000    0.03722    0.04063 =
         0.04098    0.00387    0.01569   -0.00412
AFIX  43
H31   2    0.379710    0.317324    0.575181    11.00000   -1.20000
AFIX   0
C32   1    0.425859    0.256225    0.437508    11.00000    0.03152    0.03536 =
         0.04936    0.00774    0.01436   -0.00045
AFIX  43
H32   2    0.344737    0.203517    0.403084    11.00000   -1.20000
AFIX   0
C33   1    0.523017    0.263589    0.382072    11.00000    0.02943    0.02372 =
         0.02991    0.00377    0.00165   -0.00392
C34   1    0.504065    0.193802    0.277308    11.00000    0.02923    0.02602 =
         0.03187    0.00093    0.00451   -0.00445
C35   1    0.599325    0.204011    0.222749    11.00000    0.03534    0.02936 =
         0.03304    0.00462    0.01049   -0.00658
C36   1    0.580849    0.138178    0.114505    11.00000    0.03771    0.02699 =
         0.03420   -0.00497   -0.00204   -0.00807
AFIX  43
H36   2    0.499517    0.086598    0.077116    11.00000   -1.20000
AFIX   0
C37   1    0.676535    0.147517    0.063850    11.00000    0.04108    0.03444 =
         0.03136   -0.00230    0.00999   -0.00083
AFIX  43
H37   2    0.660989    0.103079   -0.008189    11.00000   -1.20000
AFIX   0
C38   1    0.797986    0.222238    0.117130    11.00000    0.04716    0.03311 =
         0.03154    0.00092    0.00936   -0.00552
AFIX  43
H38   2    0.863835    0.227785    0.080594    11.00000   -1.20000
AFIX   0
C39   1    0.823113    0.286867    0.220155    11.00000    0.03057    0.03256 =
         0.03621   -0.00005    0.00203   -0.00954
AFIX  43
H39   2    0.906976    0.335497    0.255400    11.00000   -1.20000
AFIX   0
C40   1    0.723696    0.282323    0.276469    11.00000    0.02521    0.03006 =
         0.03811   -0.00110    0.00856   -0.00623
C41   1    0.382368    0.101674    0.228914    11.00000    0.03072    0.02818 =
         0.03615   -0.00286    0.00043   -0.00857
C42   1    0.260130    0.133710    0.159036    11.00000    0.03461    0.04000 =
         0.04452   -0.00242    0.00299   -0.00721
C43   1    0.147924    0.045231    0.118820    11.00000    0.03299    0.05332 =
         0.06597   -0.01440    0.00897   -0.01660
AFIX  43
H43   2    0.063569    0.065232    0.072275    11.00000   -1.20000
AFIX   0
C44   1    0.160167   -0.070996    0.146938    11.00000    0.05290    0.05823 =
         0.05592   -0.02136    0.02049   -0.02417
AFIX  43
H44   2    0.083894   -0.130304    0.119486    11.00000   -1.20000
AFIX   0
C45   1    0.281376   -0.101520    0.214092    11.00000    0.06615    0.03218 =
         0.05099   -0.01307    0.02561   -0.02323
AFIX  43
H45   2    0.287901   -0.182505    0.230625    11.00000   -1.20000
AFIX   0
C46   1    0.394491   -0.017121    0.258383    11.00000    0.04759    0.03001 =
         0.03360   -0.00556    0.01182   -0.01191
C47   1    0.246757    0.258881    0.128981    11.00000    0.05384    0.04467 =
         0.06866    0.00158   -0.00087    0.00270
AFIX 137
H47A  2    0.312685    0.276698    0.091796    11.00000   -1.50000
H47B  2    0.264117    0.319014    0.196289    11.00000   -1.50000
H47C  2    0.154675    0.263265    0.079090    11.00000   -1.50000
AFIX   0
C48   1    0.523990   -0.047121    0.336175    11.00000    0.06950    0.03490 =
         0.06619    0.01645    0.02275    0.01042
AFIX 137
H48A  2    0.599052   -0.027301    0.308974    11.00000   -1.50000
H48B  2    0.518095   -0.134604    0.341106    11.00000   -1.50000
H48C  2    0.540116    0.000784    0.409683    11.00000   -1.50000
AFIX   0
PART   -1 10.275
CL1A  3   -0.271390    0.445972   -0.062865    10.27500    0.04669
CL2A  3   -0.070958    0.403609   -0.202335    10.27500    0.04620
AFIX  66
C1A   1    0.113183    0.513744   -0.017604    10.27500    0.03551
AFIX  43
H1A   2    0.171725    0.501748   -0.061003    10.27500   -1.20000
AFIX  65
C2A   1    0.165204    0.569305    0.092515    10.27500    0.03875
AFIX  43
H2A   2    0.259300    0.595283    0.124378    10.27500   -1.20000
AFIX  65
C3A   1    0.079549    0.586858    0.156015    10.27500    0.04454
AFIX  43
H3A   2    0.115103    0.624832    0.231277    10.27500   -1.20000
AFIX  65
C4A   1   -0.058128    0.548849    0.109395    10.27500    0.03431
AFIX  43
H4A   2   -0.116669    0.560846    0.152795    10.27500   -1.20000
AFIX  65
C5A   1   -0.110151    0.493288   -0.000724    10.27500    0.02695
C6A   1   -0.024497    0.475734   -0.064225    10.27500    0.04352
AFIX   0
PART   -2 10.225
CL1B  3   -0.262633    0.437910   -0.042607    10.22500    0.04581
CL2B  3   -0.094537    0.424069   -0.207073    10.22500    0.04597
AFIX  66
C1B   1    0.131665    0.512676   -0.029039    10.22500    0.03695
AFIX  43
H1B   2    0.184785    0.505947   -0.077191    10.22500   -1.20000
AFIX  65
C2B   1    0.190760    0.564960    0.081474    10.22500    0.04363
AFIX  43
H2B   2    0.284271    0.593966    0.108852    10.22500   -1.20000
AFIX  65
C3B   1    0.113038    0.574805    0.151927    10.22500    0.04454
AFIX  43
H3B   2    0.153428    0.610539    0.227458    10.22500   -1.20000
AFIX  65
C4B   1   -0.023782    0.532366    0.111869    10.22500    0.02507
AFIX  43
H4B   2   -0.076902    0.539095    0.160021    10.22500   -1.20000
AFIX  65
C5B   1   -0.082880    0.480082    0.001356    10.22500    0.04820
C6B   1   -0.005158    0.470236   -0.069099    10.22500    0.02505
AFIX   0
HKLF 4


REM  XL107 in P-1 mit Loesungsmittel
REM R1 =  0.1022 for    2063 Fo > 4sig(Fo)  and  0.2343 for all    4797 data
REM    360 parameters refined using      0 restraints

END

WGHT      0.0967      4.6187

REM Highest difference peak  0.404,  deepest hole -0.405,  1-sigma level  0.097
Q1    1   0.6950  0.3493  0.6409  11.00000  0.05    0.40
Q2    1   0.6110  0.2857  0.3207  11.00000  0.05    0.40
Q3    1   0.0516  0.4865 -0.1435  11.00000  0.05    0.37
Q4    1  -0.2679  0.4810 -0.0020  11.00000  0.05    0.36
Q5    1   0.0297 -0.2370  0.1010  11.00000  0.05    0.36
Q6    1   1.3259  0.4689  0.8591  11.00000  0.05    0.36
Q7    1   0.8190  0.0197  0.4965  11.00000  0.05    0.36
Q8    1   1.1554  0.0416  0.6773  11.00000  0.05    0.36
Q9    1   0.0168 -0.1459  0.0576  11.00000  0.05    0.34
Q10   1   1.3935  0.4632  0.8079  11.00000  0.05    0.33
;
_shelx_res_checksum   52333

_shelx_hkl_file
;
  -6  -3  -2   24.05    9.53   3-0.18472-0.87712-0.94016 0.39015-0.48533-0.14143
  -5  -6  -6   -4.37    8.26   4-0.19514-0.92112-0.93617-0.10719-0.49549-0.66510
  -5  -5  -6   30.84    8.37   2-0.18242-0.91080-0.94102 0.04273-0.48308-0.64648
  -4  -9  -6   10.23    3.92   3-0.18234-0.80850-0.94104-0.50879-0.48301-0.68782
  -4  -3  -7  334.70   12.44   3-0.18622-0.76699-0.93960 0.31517-0.48680-0.67769
  -1  -4 -10    5.74    8.00   2-0.18072-0.44072-0.94164 0.16026-0.48142-0.93641
  -1   0  -7   58.64    8.10   2-0.18037-0.26530-0.94177 0.78746-0.48107-0.46293
   0  -1  -9  -16.90    9.69   4-0.19514-0.19098-0.93617 0.61475-0.49549-0.68132
   1  -5 -11   -6.83    6.04   3-0.19343-0.16906-0.93684 0.02263-0.49383-0.97290
   1  -2 -10   -2.31    8.62   3-0.18431-0.09801-0.94031 0.46970-0.48493-0.78630
   2  -4 -11   30.64    6.16   4-0.19561 0.00027-0.93598 0.17644-0.49595-0.89954
   3  -5 -11   10.13    4.27   3-0.19040 0.14071-0.93801 0.05148-0.49088-0.87682
  -6  -8  -3    3.66    5.06   4-0.19967-0.96688-0.93437-0.34171-0.49989-0.36607
  -6  -6  -4    6.19    7.00   4-0.19507-0.98927-0.93619-0.07844-0.49542-0.45481
  -6  -5  -4    7.62    7.86   3-0.19287-0.97704-0.93705 0.06418-0.49328-0.43370
  -5  -4  -6  -21.16    9.00   4-0.19584-0.88376-0.93589 0.18009-0.49617-0.61524
  -4  -1   1  404.30    4.26   4-0.19935-0.39688-0.93449 0.75761-0.49958 0.40115
  -3  -8  -8   -1.49    3.65   4-0.19629-0.70267-0.93571-0.39617-0.49661-0.85964
  -1  -7 -10    3.71    4.78   4-0.19880-0.45969-0.93472-0.26936-0.49904-0.98270
   1  -6 -11   -9.71    4.90   4-0.20149-0.16589-0.93363-0.11645-0.50166-0.98627
   1  -4 -11   86.13    7.06   4-0.20691-0.14533-0.93141 0.15705-0.50689-0.93831
   1   0  -8    7.52    7.21   4-0.20292 0.02906-0.93305 0.78517-0.50304-0.46799
  -6  -7  -4   36.25    6.27   5-0.21334-0.98187-0.92871-0.22537-0.51309-0.45879
  -6  -4  -4   21.05    8.86   4-0.20774-0.94816-0.93107 0.19950-0.50770-0.39633
  -6  -3  -3  -10.25    8.71   5-0.20762-0.89514-0.93112 0.36155-0.50758-0.25040
  -6  -3   1   12.41    4.98   4-0.21050-0.72497-0.92991 0.44144-0.51036 0.26560
  -5  -7  -6    3.14    5.29   4-0.20807-0.91212-0.93093-0.24985-0.50802-0.66746
  -5  -2  -5   87.45   12.76   5-0.21620-0.79828-0.92748 0.47277-0.51584-0.42114
  -5  -1  -2  108.18    9.05   5-0.21353-0.66391-0.92863 0.67622-0.51327-0.01839
  -4  -8  -7   18.83    4.59   5-0.21061-0.80702-0.92986-0.39818-0.51046-0.76487
  -3  -2  -8   40.26   12.42   5-0.21449-0.61394-0.92821 0.44185-0.51420-0.70624
  -3  -1  -7    9.79   10.57   4-0.20717-0.56478-0.93130 0.60555-0.50715-0.56156
  -2  -1  -8   76.48    9.88   4-0.20571-0.45162-0.93191 0.60091-0.50574-0.64045
  -1  -3 -10   34.51    8.87   4-0.20716-0.40280-0.93131 0.29024-0.50713-0.88854
  -1   1  -4   72.04    7.38   5-0.21544-0.09402-0.92781 0.97423-0.51511-0.02496
   0  -2 -10   -3.41    8.23   5-0.20944-0.22961-0.93036 0.44552-0.50934-0.81328
   0   0  -8    2.51    8.98   4-0.20937-0.12071-0.93039 0.76743-0.50927-0.51132
   0   1  -4   16.20    4.60   4-0.20904 0.05679-0.93052 0.99037-0.50895 0.02059
   1  -1   1 1923.44    3.92   5-0.21297 0.39909-0.92887 0.82413-0.51273 0.66625
   3  -4 -11   -3.54    4.58   6-0.21921 0.18943-0.92617 0.18523-0.51873-0.82366
   3  -2 -10   31.58    4.26   5-0.21257 0.24129-0.92904 0.48625-0.51235-0.65952
   3  -1  -9   45.20    3.95   6-0.22424 0.30743-0.92394 0.64354-0.52355-0.49887
  -5  -3  -6    6.06    9.64   6-0.22236-0.84706-0.92478 0.30809-0.52174-0.56503
  -5  -1  -3  124.26    8.59   5-0.22207-0.69526-0.92491 0.65205-0.52147-0.13922
  -5  -1  -1   97.55    6.09   5-0.22062-0.61483-0.92555 0.69463-0.52008 0.11533
  -4  -5  -8  -22.86    8.40   7-0.23374-0.79595-0.91961-0.00829-0.53260-0.81318
  -4  -2  -7  358.15   13.21   6-0.22710-0.71360-0.92266 0.44096-0.52627-0.61673
  -3  -6  -9   14.99    6.30   7-0.23236-0.68975-0.92025-0.15282-0.53128-0.90814
  -3  -5  -9  -12.66    6.72   6-0.22050-0.68423-0.92560-0.00332-0.51996-0.89487
  -3  -4  -9   58.00    9.50   6-0.22608-0.66608-0.92312 0.13166-0.52530-0.86560
  -2  -2  -9   23.40    9.57   5-0.21927-0.49193-0.92615 0.43311-0.51878-0.77771
  -2   0  -7  -16.33   11.22   6-0.22665-0.37493-0.92286 0.75442-0.52584-0.47028
  -1  -1  -9   27.16   11.09   6-0.22488-0.31766-0.92366 0.58587-0.52415-0.69727
  -1   1  -5   -5.75    7.83   6-0.22764-0.12108-0.92241 0.94826-0.52678-0.13869
  -1   1  -3    8.99    5.34   6-0.22284-0.04476-0.92457 0.99070-0.52220 0.11066
   0  -5 -11    9.32    6.02   6-0.22724-0.29082-0.92260-0.00552-0.52640-0.98794
   0   1  -5    1.99    5.33   6-0.22094 0.02694-0.92541 0.96703-0.52038-0.09746
   2   0  -8    7.77    4.97   5-0.22315 0.20524-0.92443 0.78905-0.52250-0.39560
  -7  -6  -1    5.56    6.35   7-0.24158-0.96800-0.91590-0.05094-0.54003-0.07556
  -7  -6   0   20.83    5.45   7-0.24479-0.92796-0.91435-0.03004-0.54306 0.05256
  -6  -3  -4  -29.58   11.01   7-0.23976-0.90364-0.91677 0.32806-0.53830-0.34682
  -4  -6  -8    9.79    5.44   6-0.23385-0.80039-0.91956-0.14673-0.53270-0.82604
  -4  -4  -8    4.58    8.07   7-0.23345-0.77577-0.91974 0.13571-0.53232-0.78257
  -4  -1  -6  180.86   11.12   6-0.23042-0.65470-0.92114 0.60144-0.52944-0.46406
  -4   0  -3  141.90    7.94   6-0.23030-0.51919-0.92120 0.80355-0.52932-0.05776
  -4   0  -2   75.35    6.55   6-0.23198-0.47587-0.92043 0.82393-0.53092 0.07233
  -3   0   0   74.15    3.85   6-0.23417-0.23257-0.91941 0.87786-0.53300 0.38044
  -2  -5 -10   27.48    7.23   7-0.23600-0.55492-0.91855-0.01765-0.53474-0.95432
  -2  -4 -10   55.06    8.71   7-0.24107-0.53830-0.91615 0.11869-0.53954-0.92623
  -1   0  -8   20.17   10.35   8-0.24268-0.24630-0.91537 0.74105-0.54107-0.53601
   0  -6 -11   -3.90    4.77   7-0.24081-0.28546-0.91627-0.14962-0.53930-0.99918
   0  -4 -11  -10.63    7.49   6-0.23374-0.27089-0.91961 0.13248-0.53260-0.95726
   0   1  -3   16.63    3.81   7-0.23495 0.12276-0.91905 0.99949-0.53374 0.17324
   1  -3 -11    6.26    7.73   6-0.23374-0.10212-0.91961 0.28724-0.53260-0.88417
   2  -3 -11   -1.05    5.72   8-0.24519 0.06299-0.91415 0.29596-0.54344-0.83666
   3   0  -7  128.80    2.68   8-0.25396 0.43273-0.90980 0.80924-0.55169-0.19508
   4  -1  -8   22.11    2.11  10-0.27178 0.55249-0.90049 0.65575-0.56832-0.27741
  -7  -5  -1   51.51    7.16   8-0.24797-0.95161-0.91381 0.08626-0.54692-0.04942
  -7  -5   0   83.99    6.18   8-0.25005-0.90773-0.91279 0.10597-0.54887 0.08037
  -6  -6  -5   14.04    6.90   8-0.24992-0.97396-0.91286-0.12532-0.54875-0.53065
  -6  -5  -5   30.29    7.62   7-0.24356-0.96721-0.91595 0.01974-0.54276-0.51394
  -6  -4  -5   -5.24    9.91   8-0.24969-0.94331-0.91297 0.15786-0.54854-0.48194
  -6  -2  -2   32.72    8.04   7-0.24485-0.80158-0.91533 0.50648-0.54398-0.06029
  -6  -2  -1   75.48    6.69   7-0.24537-0.76044-0.91507 0.52661-0.54448 0.06579
  -5  -8  -6    3.23    4.17   8-0.25885-0.87734-0.90837-0.41928-0.55711-0.64751
  -5  -5  -7   -9.43    8.45   9-0.25885-0.88437-0.90837-0.01682-0.55711-0.71133
  -5  -3   3  189.84    1.86   9-0.26979-0.42488-0.90267 0.46871-0.56729 0.62981
  -5  -1  -4  215.46    9.77   7-0.24403-0.71642-0.91572 0.61916-0.54321-0.24667
  -5  -1   0   14.31    5.96   8-0.25010-0.54345-0.91277 0.69872-0.54892 0.27179
  -4  -3  -8   29.21   10.54   8-0.25018-0.74191-0.91272 0.26571-0.54900-0.73987
  -4   0  -4   18.82    9.25   7-0.24448-0.54777-0.91551 0.77508-0.54364-0.17050
  -4   0  -1   86.26    7.16   8-0.25351-0.41089-0.91107 0.83342-0.55212 0.22125
  -3  -3  -9   -8.31    8.48   8-0.24731-0.62786-0.91413 0.26501-0.54630-0.82339
  -2  -6 -10   -0.00    5.29   8-0.25106-0.55484-0.91229-0.17057-0.54983-0.96703
  -2   1  -4   -0.00    6.94   8-0.24618-0.21952-0.91469 0.94496-0.54523-0.04507
  -2   1  -3    0.30    6.20   7-0.24618-0.17733-0.91469 0.96339-0.54523 0.08393
  -1  -2 -10   93.12   10.27   7-0.24751-0.35017-0.91404 0.41045-0.54649-0.82681
   0   1  -6    7.83    5.93   7-0.24437 0.00846-0.91556 0.93352-0.54353-0.20089
   1   1  -5  124.07    4.69   8-0.24765 0.20812-0.91397 0.96600-0.54662-0.02153
  -7  -7  -1   31.40    5.28   9-0.27002-0.95519-0.90203-0.20700-0.56736-0.07186
  -7  -6  -2   -0.39    6.30  10-0.27028-0.98858-0.90189-0.08847-0.56759-0.17954
  -7  -5  -2  119.03    8.07   9-0.26199-0.97817-0.90625 0.05818-0.55989-0.16304
  -6  -2  -3    6.67    8.89   9-0.25885-0.83010-0.90787 0.47777-0.55696-0.17677
  -6  -2   0   10.06    6.35   9-0.26770-0.69741-0.90326 0.53497-0.56520 0.21611
  -5  -6  -7   -4.85    6.21   9-0.26261-0.88723-0.90593-0.15681-0.56047-0.72435
  -5  -4  -7   14.00    8.21   8-0.25882-0.86430-0.90788 0.12770-0.55694-0.68200
  -5  -2  -6  106.23   10.55   8-0.25984-0.79532-0.90736 0.42808-0.55788-0.50773
  -4  -7  -8   19.62    4.65   9-0.26233-0.78510-0.90608-0.30316-0.56020-0.82344
  -3  -7  -9    1.24    3.76   8-0.25912-0.67381-0.90773-0.30727-0.55722-0.90372
  -3  -1  -8  226.44   12.85   9-0.26597-0.54893-0.90417 0.55458-0.56360-0.63582
  -2  -3 -10    7.63    9.36  10-0.27094-0.50009-0.90154 0.24388-0.56821-0.88806
  -2   1  -5   15.66    7.79   8-0.25925-0.24729-0.90766 0.91726-0.55734-0.16015
  -1   1  -6  353.96    7.57   8-0.25523-0.13710-0.90971 0.91248-0.55358-0.24437
   0  -3 -11   -7.17    8.22   8-0.25912-0.23523-0.90773 0.25866-0.55722-0.91086
   1  -1 -10   -5.95    8.18   9-0.26104-0.01308-0.90674 0.57664-0.55900-0.69100
   1   1  -6  522.11    5.96   9-0.26379 0.18306-0.90532 0.93603-0.56156-0.13671
   1   1  -4  252.46    3.68   9-0.26206 0.26422-0.90622 0.97963-0.55995 0.11750
   3  -3 -11   11.96    4.51  10-0.27363 0.24554-0.90009 0.29518-0.57069-0.75555
  -7  -4  -2   45.03    8.28  10-0.27857-0.94738-0.89695 0.19151-0.57497-0.12675
  -7  -4  -1   87.36    7.75   9-0.27181-0.91466-0.90064 0.21570-0.56872-0.00596
  -7  -4   0   13.26    6.90  11-0.28688-0.86177-0.89229 0.22738-0.58261 0.13735
  -6  -7  -5   -5.68    5.01  10-0.27577-0.96012-0.89849-0.27763-0.57239-0.52897
  -6  -3  -5   -1.70   10.66  10-0.27753-0.90577-0.89752 0.28595-0.57401-0.43732
  -5  -3  -7   12.80   10.70  11-0.28229-0.83154-0.89488 0.25727-0.57839-0.64124
  -5  -1  -5  -13.18    9.73  10-0.27278-0.72486-0.90011 0.58639-0.56962-0.34661
  -4  -1  -7  634.27   14.00  10-0.27846-0.64998-0.89701 0.55364-0.57487-0.54761
  -3  -1   2   74.10    1.67  12-0.29940-0.09707-0.88500 0.74238-0.59404 0.67422
  -3   0  -7   56.89   12.86  10-0.27900-0.47944-0.89671 0.71033-0.57536-0.47190
  -2  -1  -9  154.75   10.15   9-0.27259-0.42836-0.90021 0.54625-0.56945-0.70535
  -2   0  -8    3.62   11.62  11-0.28200-0.36451-0.89504 0.70486-0.57813-0.54967
  -2   1  -2   25.53    6.87  10-0.27900-0.10083-0.89671 0.96899-0.57537 0.24104
  -1   1  -2  477.99    4.74   9-0.27083 0.04449-0.90116 0.98798-0.56782 0.28039
   0  -1 -10   19.48    9.56  11-0.28056-0.14993-0.89585 0.55387-0.57681-0.73152
   0   0  -9  106.96    9.37  10-0.27897-0.09603-0.89673 0.71287-0.57534-0.57634
   0   1  -7  652.08    8.43  10-0.28210 0.00358-0.89499 0.89301-0.57822-0.29767
   1   0  -9   63.60    7.56  10-0.27609 0.05507-0.89831 0.72986-0.57268-0.52811
   2  -1 -10  -16.17    5.96  10-0.27721 0.16684-0.89770 0.58741-0.57372-0.62213
  -7  -7  -2   -3.70    5.39  10-0.28462-0.97659-0.89351-0.23264-0.58027-0.18611
  -7  -5  -3    2.37    7.67  12-0.29645-0.99260-0.88668 0.01931-0.59109-0.26285
  -6  -2  -4  157.21    9.68  10-0.28193-0.84686-0.89502 0.44526-0.57780-0.28464
  -5  -7  -7   -2.04    4.55  12-0.29704-0.86993-0.88633-0.31640-0.59163-0.71874
  -4  -2  -8   46.57   11.56  11-0.28780-0.69549-0.89170 0.38909-0.58319-0.68842
  -3  -2  -9  312.14    9.95  10-0.28305-0.58570-0.89440 0.38560-0.57882-0.77033
  -3   1  -4   46.82    9.90  11-0.29126-0.32917-0.88971 0.90694-0.58635-0.05638
  -3   1  -3   36.07    8.60  11-0.29301-0.28687-0.88870 0.92635-0.58795 0.07428
  -2  -2   3   59.45    1.37  12-0.30644 0.09370-0.88068 0.63160-0.60017 0.83680
  -2   1  -6   70.50    8.68  11-0.28551-0.26356-0.89301 0.88277-0.58109-0.26544
  -1  -5 -11    0.05    4.74  10-0.28369-0.39512-0.89404-0.04889-0.57941-0.99060
  -1  -4 -11   -9.11    6.71  11-0.28977-0.37000-0.89057 0.09289-0.58499-0.96592
  -1   1  -7  226.00    9.53  11-0.29274-0.14251-0.88885 0.87261-0.58771-0.33807
   1  -2 -11  -15.10    7.65  11-0.29105-0.03713-0.88983 0.39874-0.58616-0.81607
   2  -2 -11    9.54    6.37  11-0.29803 0.12549-0.88575 0.40882-0.59253-0.75842
  -7  -6  -3   -1.90    5.95  11-0.29675-0.99837-0.88691-0.12162-0.59146-0.28229
  -7  -4  -3   18.28    8.39  13-0.30796-0.96764-0.88017 0.15469-0.60163-0.22903
  -6  -5  -6   -2.06    7.58  12-0.30290-0.94888-0.88324-0.03008-0.59705-0.59154
  -6  -4  -6   41.53    9.17  12-0.30513-0.93212-0.88190 0.10880-0.59907-0.56268
  -4   0  -6   92.22   13.62  12-0.30061-0.57192-0.88462 0.70426-0.59497-0.37466
  -2  -2 -10   80.25    8.69  12-0.29863-0.45766-0.88579 0.37114-0.59317-0.83118
  -1  -6 -11   -7.93    4.33  12-0.30321-0.38443-0.88306-0.19906-0.59733-0.99727
  -1  -3 -11    5.90    7.88  13-0.30909-0.34569-0.87948 0.21779-0.60265-0.92673
  -1  -1 -10   74.55   10.55  12-0.30446-0.28483-0.88230 0.52297-0.59846-0.75514
  -1   0  -9   -3.49   10.82  12-0.30295-0.22530-0.88321 0.68720-0.59709-0.60463
   0  -2 -11   53.47    8.56  12-0.30715-0.17973-0.88067 0.37446-0.60090-0.85219
   1   1  -7    1.30    6.27  11-0.29766 0.17520-0.88637 0.89848-0.59229-0.23003
   2   0  -9    0.46    5.43  12-0.30670 0.24424-0.88094 0.72652-0.60049-0.45059
   2   0  -2 2083.55    1.89  14-0.32393 0.55472-0.87010 0.85962-0.61598 0.45768
  -7  -4   1    3.99    4.79  13-0.31982-0.78320-0.87288 0.22973-0.61254 0.29293
  -7  -3  -2   53.23    8.84  13-0.31453-0.90004-0.87622 0.31095-0.60779-0.07173
  -7  -3  -1    4.09    7.71  12-0.31110-0.85951-0.87836 0.33303-0.60470 0.05410
  -6  -6  -6    6.78    5.64  13-0.31815-0.95023-0.87394-0.18294-0.61104-0.59932
  -6  -2  -5   88.03   11.43  13-0.31475-0.85546-0.87608 0.40485-0.60799-0.38042
  -6  -2   1    7.59    5.29  13-0.31868-0.60246-0.87360 0.52512-0.61152 0.38993
  -6  -1  -2    0.00    9.15  12-0.30935-0.71457-0.87944 0.60713-0.60313 0.02201
  -5  -2  -7    9.79    9.61  13-0.31125-0.78533-0.87826 0.38010-0.60484-0.58894
  -5  -1  -6   84.59   10.30  12-0.31080-0.73107-0.87854 0.54205-0.60443-0.43872
  -5   0  -3   67.48    8.31  13-0.31078-0.59327-0.87855 0.74402-0.60442-0.03282
  -5   0  -2   25.34    8.93  13-0.31589-0.54859-0.87536 0.76170-0.60901 0.09700
  -4  -5  -9   -7.43    5.73  13-0.31457-0.74863-0.87619-0.06944-0.60783-0.86436
  -4  -4  -9   15.03    7.52  12-0.31026-0.73872-0.87888 0.07310-0.60394-0.83864
  -4   0   0   18.28    5.49  13-0.31539-0.31094-0.87568 0.81860-0.60856 0.40567
  -3  -5 -10   -3.76    5.53  14-0.32159-0.63089-0.87174-0.08200-0.61412-0.93456
  -3  -4 -10   18.79    6.90  13-0.31452-0.62060-0.87623 0.06425-0.60778-0.91122
  -3   1  -2   33.28    7.40  13-0.31560-0.22218-0.87555 0.93315-0.60875 0.22223
   3   0  -8   23.86    2.76  14-0.32419 0.45881-0.87006 0.75060-0.61645-0.25737
  -7  -5  -4   17.30    7.12  14-0.33057-0.99636-0.86602-0.02202-0.62220-0.35812
  -7  -3  -3   23.08    9.14  14-0.33030-0.92621-0.86620 0.28176-0.62196-0.18486
  -7  -3   0   14.22    7.19  14-0.33398-0.79891-0.86374 0.34019-0.62522 0.20093
  -6  -3  -6   -0.95    9.73  14-0.32683-0.89987-0.86848 0.23712-0.61886-0.52530
  -6  -1  -3  -12.71    8.46  14-0.32187-0.75108-0.87169 0.58386-0.61444-0.09691
  -6  -1  -1    9.08    7.82  14-0.33173-0.66085-0.86525 0.61699-0.62323 0.16815
  -5  -5  -8    4.75    5.89  15-0.33083-0.84969-0.86584-0.07621-0.62243-0.76966
  -5  -4  -8    6.10    7.78  14-0.32880-0.83682-0.86719 0.06837-0.62062-0.74671
  -5  -1   1   27.39    4.44  14-0.32614-0.42325-0.86893 0.67924-0.61825 0.46937
  -5   0  -4   13.94    9.30  13-0.32171-0.62510-0.87180 0.71689-0.61429-0.15131
  -4  -6  -9   -7.91    4.20  14-0.32845-0.74464-0.86742-0.21827-0.62031-0.87089
  -4  -3  -9   34.68    9.31  14-0.32551-0.71173-0.86934 0.20426-0.61769-0.80248
  -3  -1  -9   94.50   11.61  14-0.32784-0.52809-0.86781 0.49856-0.61977-0.70555
  -3   0  -8   15.71   12.55  14-0.33080-0.47177-0.86587 0.65901-0.62240-0.55563
  -2   1  -7    3.70    9.22  13-0.32080-0.26961-0.87238 0.84064-0.61348-0.36143
   0   1  -8  478.43    8.89  14-0.32582 0.00502-0.86914 0.84388-0.61796-0.38544
   0   1  -2  989.34    3.99  14-0.33056 0.26080-0.86602 0.96712-0.62219 0.38462
   3  -1 -10   -0.26    4.13  15-0.33736 0.37673-0.86147 0.55935-0.62821-0.52267
  -7  -6  -4   10.54    5.22  15-0.33954-0.99632-0.85985-0.16830-0.63027-0.37130
  -7  -4  -4    5.80    7.16  15-0.33462-0.97714-0.86318 0.11597-0.62593-0.33164
  -6  -1  -4   -5.39   11.51  15-0.33777-0.77851-0.86105 0.55090-0.62871-0.21037
  -5   0  -1   26.47    7.45  15-0.33956-0.48105-0.85983 0.77003-0.63029 0.24479
  -4  -1  -8  918.10   11.51  14-0.33258-0.63836-0.86455 0.50056-0.62411-0.62613
  -4   0  -7  178.62   13.51  15-0.34024-0.57539-0.85937 0.65722-0.63089-0.46744
  -3  -6 -10   -7.27    3.90  15-0.33945-0.61759-0.85991-0.23138-0.63019-0.94184
  -3  -3 -10   10.74    7.01  14-0.33166-0.59243-0.86516 0.19402-0.62330-0.87709
  -2   0  -9  -33.10   11.66  15-0.33898-0.34370-0.86023 0.65043-0.62977-0.62340
  -1  -2 -11  189.56    9.06  15-0.33773-0.30242-0.86108 0.33775-0.62867-0.87403
  -1   1  -8    2.39    8.18  15-0.33597-0.13986-0.86227 0.82434-0.62712-0.42508
   1  -4 -12   -0.69    5.03  15-0.33843-0.05646-0.86060 0.06597-0.62929-0.94175
   1   1  -8  146.69    6.77  15-0.34316 0.17797-0.85736 0.84869-0.63346-0.31960
   1   1  -3   -5.15    2.73  16-0.34601 0.38931-0.85538 0.94909-0.63596 0.32981
   3  -2 -11   -5.63    4.31  15-0.34535 0.32878-0.85584 0.39148-0.63538-0.66265
  -5  -6  -8    5.21    4.46  16-0.34786-0.84461-0.85386-0.22735-0.63759-0.77579
  -5  -3  -8  -12.49    7.54  16-0.34434-0.80630-0.85632 0.20050-0.63450-0.71602
  -5   0  -5  487.93   10.66  15-0.34257-0.64769-0.85754 0.68171-0.63295-0.26271
  -4  -2  -9   -8.44   10.04  16-0.35366-0.67178-0.84974 0.32600-0.64266-0.75756
  -4   1  -4   26.15    9.45  15-0.34514-0.43133-0.85576 0.85748-0.63520-0.05720
  -4   1  -3    9.19    7.76  15-0.34602-0.39028-0.85514 0.87659-0.63598 0.07139
  -2  -5 -11    5.98    4.52  15-0.34619-0.48745-0.85502-0.10188-0.63613-0.98205
  -2  -4 -11    3.42    5.00  15-0.34536-0.47699-0.85561 0.03856-0.63540-0.96383
  -2  -1 -10   78.80    9.31  15-0.34479-0.39752-0.85600 0.48188-0.63490-0.76888
   0   0 -10    5.62    9.39  16-0.35401-0.06313-0.84949 0.64655-0.64297-0.64024
   1  -1 -11    5.90    7.29  16-0.35609 0.04094-0.84799 0.49665-0.64478-0.73510
   1   0 -10    0.82    7.54  16-0.35296 0.09253-0.85025 0.66024-0.64205-0.58746
   2   1  -6    7.73    3.03  16-0.35250 0.42708-0.85057 0.89897-0.64165-0.00136
  -7  -3  -4   33.23    7.59  16-0.35592-0.94273-0.84814 0.24335-0.64460-0.28960
  -7  -2  -2   22.22    9.13  17-0.36395-0.83932-0.84227 0.41848-0.65156-0.00512
  -6  -4  -7    6.05    7.18  17-0.36624-0.91471-0.84057 0.04702-0.65354-0.63775
  -6  -2  -6   11.59    9.05  16-0.35519-0.85735-0.84867 0.35717-0.64396-0.47384
  -6  -1  -5    1.92   11.55  16-0.35935-0.79414-0.84565 0.51379-0.64758-0.31744
  -6  -1   0    9.95    6.44  17-0.36377-0.58384-0.84241 0.61511-0.65141 0.32405
  -5  -1  -7   58.71    9.96  16-0.35517-0.72792-0.84869 0.49586-0.64394-0.52558
  -4   1  -2   27.04    8.11  18-0.36754-0.32821-0.83959 0.88431-0.65467 0.21845
  -3  -2 -10   34.21    8.07  16-0.35800-0.55242-0.84664 0.31781-0.64641-0.83062
  -3   1  -7  -23.20   10.27  17-0.35903-0.38385-0.84589 0.80013-0.64730-0.37584
  -2  -3 -11   -2.59    5.98  16-0.35719-0.45167-0.84722 0.17050-0.64570-0.93048
  -2   1  -8    4.35   11.29  16-0.35868-0.27167-0.84614 0.79134-0.64700-0.45316
  -2   1  -1  329.71    4.79  16-0.35395 0.01368-0.84956 0.94231-0.64288 0.43333
   0  -4 -12    4.25    4.73  17-0.36338-0.18780-0.84270 0.03375-0.65107-0.97307
   0  -1 -11    8.83    8.02  17-0.36193-0.10929-0.84376 0.47747-0.64982-0.78191
   1  -3 -12   -8.91    5.10  17-0.36592-0.01687-0.84081 0.18722-0.65326-0.90028
   2   1  -7  -16.20    4.39  18-0.36887 0.40554-0.83860 0.86742-0.65581-0.11132
   2   1  -5   13.29    2.71  18-0.37722 0.49107-0.83222 0.90274-0.66297 0.14693
  -7  -5  -5    8.22    6.01  18-0.37309-0.99047-0.83540-0.07200-0.65948-0.44713
  -7  -4  -5   21.13    7.71  17-0.37009-0.97689-0.83769 0.07162-0.65689-0.42593
  -7  -3   1   10.60    4.79  19-0.38542-0.70576-0.82581 0.32250-0.66999 0.37540
  -7  -2  -3   94.53    8.43  17-0.36971-0.87262-0.83797 0.39518-0.65657-0.12868
  -7  -2  -1  127.29    8.03  18-0.37037-0.79068-0.83747 0.43359-0.65714 0.12762
  -6  -5  -7   21.97    4.89  17-0.36806-0.92448-0.83922-0.09327-0.65515-0.65863
  -6  -3  -7   -6.84    8.68  19-0.38109-0.89044-0.82922 0.17636-0.66631-0.60542
  -5  -2  -8   44.70    8.47  17-0.36904-0.77082-0.83848 0.32165-0.65599-0.66740
  -5   0  -6    4.92   10.48  17-0.36938-0.65924-0.83822 0.64185-0.65628-0.36446
  -3   1  -1   46.63    5.26  17-0.36902-0.12512-0.83849 0.91698-0.65598 0.39792
  -1   0 -10   24.25    8.53  17-0.36856-0.20383-0.83884 0.62125-0.65558-0.67395
   0  -3 -12   18.38    6.16  18-0.38080-0.15821-0.82945 0.16150-0.66606-0.93822
   0   1  -9  -11.57    8.61  19-0.38109 0.01911-0.82922 0.78768-0.66631-0.46565
   2  -1 -11  -30.55    6.14  19-0.38085 0.22889-0.82941 0.49566-0.66610-0.65849
   4  -1  -9    3.46    1.89  21-0.40981 0.64858-0.80565 0.53732-0.69045-0.28048
  -7  -3  -5   30.12    8.77  19-0.38795-0.94967-0.82385 0.19733-0.67220-0.38961
  -7  -2  -4   -4.31    9.79  19-0.38695-0.89588-0.82464 0.35921-0.67136-0.24007
  -5   0   0   28.80    6.10  19-0.38843-0.39133-0.82346 0.75031-0.67261 0.41804
  -4   0  -8   55.44   11.97  19-0.38541-0.57147-0.82587 0.60453-0.67006-0.55575
  -4   1  -6  122.35   11.52  18-0.37985-0.47876-0.83025 0.79381-0.66533-0.27897
  -3   0  -9   36.13    9.65  18-0.38168-0.45991-0.82881 0.60101-0.66689-0.63520
  -2  -2 -11  249.67    8.52  19-0.38252-0.41387-0.82816 0.29017-0.66760-0.88607
  -1  -1 -11    7.76    8.79  19-0.38439-0.24257-0.82668 0.44540-0.66919-0.81236
  -1   1  -9    1.04   10.57  19-0.38603-0.13164-0.82538 0.76732-0.67058-0.50999
  -1   2  -5   98.92    7.95  19-0.38551 0.04760-0.82579 0.99058-0.67014 0.02358
   2   0 -10   35.00    5.44  19-0.38720 0.28152-0.82444 0.64839-0.67157-0.50876
   3   0  -9   66.79    3.60  20-0.40032 0.49202-0.81374 0.67356-0.68262-0.31975
  -7  -6  -5  -10.59    4.52  20-0.39798-0.98125-0.81561-0.23493-0.68058-0.45785
  -7  -2   0   59.40    6.32  20-0.39939-0.71958-0.81444 0.43258-0.68176 0.28072
  -6  -6  -7   -5.03    3.79  20-0.39166-0.91270-0.82079-0.25437-0.67526-0.66704
  -6  -1  -6   69.54   11.31  20-0.39500-0.80483-0.81806 0.46586-0.67808-0.41495
  -6   0  -3  103.02    9.22  19-0.39317-0.66662-0.81956 0.67095-0.67653-0.01245
  -6   0  -2   94.91    9.43  20-0.40018-0.61916-0.81379 0.68640-0.68242 0.12144
  -4  -4 -10    4.52    5.21  20-0.39907-0.69374-0.81471-0.01161-0.68149-0.89147
  -4  -1  -9   -5.55    8.67  19-0.39080-0.62158-0.82148 0.43830-0.67454-0.70338
  -3  -1 -10   12.93    9.78  19-0.39371-0.50260-0.81912 0.42934-0.67699-0.77580
  -3   0   1   -2.38    3.06  20-0.39760-0.03271-0.81593 0.79181-0.68025 0.65642
  -3   1  -8   -2.93   12.53  20-0.39987-0.38841-0.81405 0.74791-0.68216-0.47200
  -2   0 -10    2.52   10.62  20-0.39588-0.33032-0.81734 0.58152-0.67882-0.69809
  -2   2  -6  -19.01   10.31  20-0.39874-0.13466-0.81498 0.94526-0.68122-0.14111
  -2   2  -5  389.42    8.31  19-0.38957-0.10492-0.82247 0.97229-0.67350-0.02450
  -2   2  -4  566.39    7.65  20-0.39468-0.05868-0.81833 0.98845-0.67781 0.10674
  -1   1  -1 2397.32    4.77  19-0.39218 0.20797-0.82036 0.92784-0.67570 0.51645
  -1   2  -6  197.85    7.28  19-0.39065 0.00986-0.82161 0.96608-0.67441-0.10050
  -1   2  -4   16.47    7.34  20-0.39944 0.10301-0.81440 0.99995-0.68180 0.16404
   1  -2 -12   25.89    6.04  20-0.40405 0.03274-0.81055 0.29790-0.68565-0.84492
   1   1  -9    1.77    6.78  20-0.39414 0.18665-0.81877 0.79102-0.67735-0.40131
   2   1  -8   50.71    5.25  20-0.40142 0.39117-0.81276 0.82013-0.68345-0.21711
  -6  -2  -7   25.85    8.14  20-0.40220-0.85275-0.81203 0.30010-0.68416-0.56239
  -6   0  -4   84.19    9.61  20-0.40155-0.70232-0.81257 0.64342-0.68362-0.13297
  -5  -4  -9    5.54    4.50  20-0.40432-0.80179-0.81024-0.00973-0.68593-0.80876
  -5  -3  -9    0.56    6.67  22-0.41540-0.78293-0.80072 0.12118-0.69512-0.78271
  -5  -1  -8  114.15    8.94  20-0.40388-0.72178-0.81061 0.43391-0.68557-0.61439
  -5   0  -7    1.29    9.97  20-0.40405-0.66477-0.81047 0.59327-0.68570-0.46201
  -5   1  -4   58.69    9.36  21-0.40503-0.52682-0.80964 0.79725-0.68652-0.05545
  -5   1  -3   76.19    8.29  21-0.40503-0.48599-0.80963 0.81609-0.68653 0.07097
  -4  -5 -10    2.35    3.74  21-0.41002-0.69623-0.80538-0.16190-0.69067-0.90528
  -4  -3 -10   41.01    5.61  20-0.40471-0.67584-0.80991 0.12575-0.68626-0.86236
  -4   1  -7    8.11   13.01  21-0.41206-0.49357-0.80362 0.74563-0.69236-0.38743
  -4   1  -1   73.16    5.97  21-0.40592-0.24568-0.80888 0.87139-0.68727 0.37846
  -2   1  -9   35.52   11.66  21-0.40895-0.26570-0.80630 0.73522-0.68978-0.53875
  -1  -3 -12  141.26    5.54  21-0.41321-0.28343-0.80263 0.12194-0.69331-0.96013
  -1   2  -7  143.48    9.53  21-0.40872-0.01478-0.80650 0.93038-0.68959-0.21290
   0  -2 -12  179.67    6.66  21-0.41105-0.11794-0.80450 0.27786-0.69152-0.89012
   0   2  -6   79.33    7.06  21-0.40552 0.18011-0.80923 0.96788-0.68693-0.03682
   0   2  -5  174.54    6.70  21-0.41049 0.22770-0.80498 0.98424-0.69106 0.09485
  -7  -4  -6    7.01    5.97  22-0.42248-0.97006-0.79442 0.00683-0.70076-0.51141
  -7  -2  -5    6.12    7.72  21-0.41575-0.90971-0.80037 0.31459-0.69524-0.34461
  -7  -1  -3  105.75   10.28  22-0.42007-0.81029-0.79657 0.49178-0.69878-0.06180
  -7  -1  -2   95.02    9.50  22-0.42043-0.76830-0.79625 0.51306-0.69908 0.06442
  -6   0  -5  565.39   12.80  22-0.41783-0.72775-0.79855 0.60677-0.69694-0.24850
  -6   0  -1   20.56    8.04  22-0.42346-0.55494-0.79354 0.68635-0.70156 0.26890
  -5  -5  -9   -2.70    3.64  22-0.41584-0.80034-0.80029-0.15843-0.69531-0.82745
  -5   1  -5  107.44   10.34  21-0.41563-0.55527-0.80048 0.76933-0.69513-0.17455
  -5   1  -2  136.33    9.01  22-0.42250-0.42891-0.79440 0.82248-0.70078 0.21254
  -3  -4 -11    6.90    4.05  21-0.41550-0.56397-0.80059-0.03002-0.69503-0.95382
  -3  -3 -11   41.28    5.83  22-0.41997-0.54798-0.79666 0.10678-0.69870-0.92711
  -3   2  -5  368.82   10.13  21-0.41324-0.23733-0.80255 0.93890-0.69317-0.05478
  -3   2  -4   62.43    8.17  21-0.41420-0.19615-0.80172 0.95796-0.69396 0.07261
  -2  -1 -11   19.38    8.72  22-0.41921-0.36315-0.79733 0.40230-0.69808-0.83166
  -2   2  -7   94.32   11.15  22-0.41961-0.15789-0.79697 0.90675-0.69841-0.25393
  -2   2  -3  480.56    8.25  22-0.42093 0.00918-0.79580 0.98756-0.69949 0.25634
   0   2  -7   10.44    7.47  22-0.41826 0.15282-0.79816 0.93630-0.69730-0.15337
   2  -2 -12    5.06    4.53  23-0.43061 0.21470-0.78706 0.29034-0.70739-0.77363
  -8  -5  -2  -15.52    5.22  24-0.43661-0.96613-0.78149-0.08299-0.71231-0.07224
  -8  -4  -2   26.23    5.95  23-0.43138-0.95250-0.78634 0.06609-0.70808-0.04499
  -8  -4  -1   18.63    6.03  23-0.43414-0.90747-0.78379 0.08422-0.71031 0.08628
  -7  -5  -6  -13.23    4.63  23-0.43261-0.97312-0.78521-0.14309-0.70908-0.53382
  -7  -3  -6   10.06    7.57  23-0.42978-0.94858-0.78781 0.14089-0.70678-0.48250
  -7  -1  -4   11.51   10.41  23-0.43223-0.83856-0.78555 0.46374-0.70877-0.18105
  -7  -1  -1   40.78    8.15  23-0.43572-0.71089-0.78232 0.52045-0.71159 0.20421
  -6  -4  -8    4.52    5.20  22-0.42689-0.88800-0.79044-0.02225-0.70444-0.70829
  -6  -1   1   76.23    5.50  23-0.43600-0.47122-0.78206 0.57596-0.71182 0.51222
  -5  -2  -9   -1.74    7.45  22-0.42670-0.75039-0.79061 0.25205-0.70428-0.74242
  -4  -2 -10   40.07    6.43  22-0.42507-0.64413-0.79208 0.24847-0.70295-0.82464
  -4   0   1  212.98    4.20  23-0.42795-0.15552-0.78947 0.75231-0.70530 0.62843
  -3   2  -6   86.14   10.79  22-0.42530-0.26702-0.79187 0.90917-0.70314-0.17178
  -3   2  -3  162.44    9.09  23-0.43132-0.13708-0.78640 0.96330-0.70803 0.21512
  -2   0   1 1703.79    2.76  23-0.43032 0.16097-0.78731 0.77996-0.70722 0.73217
   0   0 -11   -0.53    7.01  23-0.42671-0.02438-0.79060 0.56982-0.70429-0.69965
   0   1 -10  -11.71    8.68  23-0.43349 0.03607-0.78440 0.72266-0.70979-0.54132
   1   0 -11   -2.31    6.67  22-0.42705 0.12441-0.79030 0.57789-0.70456-0.64722
  -8  -4  -3   62.31    6.04  24-0.44538-0.98055-0.77311 0.03193-0.71942-0.16097
  -6  -3  -8    8.67    5.73  23-0.43740-0.87136-0.78068 0.10750-0.71302-0.68321
  -6  -1  -7   24.02    8.18  23-0.43578-0.80532-0.78219 0.41204-0.71172-0.51259
  -6   0  -6   20.34   11.50  23-0.43926-0.74074-0.77893 0.56656-0.71452-0.35458
  -5   1  -6  101.37   10.82  23-0.43635-0.58064-0.78167 0.72838-0.71218-0.28643
  -4   0  -9  106.75    9.25  23-0.43635-0.56359-0.78166 0.53928-0.71218-0.64386
  -3  -2 -11    2.74    5.71  23-0.43776-0.51437-0.78035 0.23051-0.71331-0.89059
  -3   0 -10   11.04    9.95  24-0.44064-0.44361-0.77763 0.52918-0.71563-0.71567
  -3   1  -9   28.56   11.55  24-0.44399-0.38626-0.77445 0.68753-0.71831-0.56374
  -1  -2 -12   -1.88    5.01  23-0.43652-0.24617-0.78151 0.24048-0.71231-0.91916
  -1   0 -11    0.73    8.65  25-0.44727-0.17059-0.77129 0.53503-0.72092-0.74744
  -1   1 -10   73.03    9.95  24-0.44255-0.11881-0.77582 0.70054-0.71715-0.59160
  -1   2  -8   -6.82    7.91  24-0.43767-0.02185-0.78043 0.88655-0.71324-0.31348
  -1   2  -3  226.22    5.67  24-0.43942 0.18380-0.77878 0.98487-0.71465 0.32311
   0   2  -8   15.72    8.23  23-0.44128 0.13392-0.77702 0.89291-0.71614-0.26077
   0   2  -4   -5.94    5.85  24-0.44180 0.30119-0.77653 0.97704-0.71656 0.24918
   2   1  -9   48.57    5.58  24-0.44769 0.39479-0.77089 0.75764-0.72125-0.30732
  -8  -3  -3    8.95    6.96  25-0.45860-0.95476-0.76015 0.16053-0.72990-0.12880
  -8  -3  -2   30.77    7.05  25-0.45276-0.92153-0.76594 0.18557-0.72531-0.00606
  -8  -3  -1   -2.19    6.99  26-0.45913-0.87455-0.75962 0.19931-0.73032 0.12099
  -7  -2  -6    1.77    8.74  24-0.44959-0.91457-0.76905 0.26251-0.72279-0.44356
  -7  -2   1   27.44    5.03  26-0.45977-0.61746-0.75897 0.39759-0.73082 0.45752
  -7  -1  -5   24.16   10.14  26-0.45694-0.86194-0.76180 0.41782-0.72860-0.29256
  -6  -2  -8   18.47    7.53  25-0.45208-0.84067-0.76662 0.23397-0.72476-0.64665
  -5   0  -8    6.93    9.27  25-0.44912-0.66553-0.76951 0.53382-0.72242-0.55694
  -5   1  -1  237.42    7.93  25-0.45662-0.35353-0.76212 0.80955-0.72835 0.36784
  -4  -1 -10    6.03    8.22  24-0.44869-0.60069-0.76992 0.36650-0.72208-0.77527
  -4   1  -8   59.61   10.20  24-0.44583-0.49888-0.77269 0.69243-0.71980-0.48548
  -4   2  -4   35.99   10.03  25-0.44823-0.31690-0.77037 0.91426-0.72171 0.04887
  -3   2  -7  -12.11    9.88  25-0.44695-0.28483-0.77161 0.87036-0.72069-0.28290
  -2   2  -8   47.35    9.07  24-0.44884-0.17108-0.76978 0.85996-0.72220-0.35717
   0  -1 -12   10.26    6.47  25-0.45716-0.05698-0.76159 0.37619-0.72877-0.83229
   0  -1   1  206.93    1.27  25-0.45073 0.48136-0.76794 0.64954-0.72369 0.82746
   1  -1 -12   18.76    6.18  26-0.45927 0.10028-0.75948 0.38922-0.73043-0.77844
   1   1 -10   22.17    7.01  25-0.45278 0.20320-0.76593 0.71832-0.72532-0.48159
   3  -1 -11   -2.39    3.69  27-0.47205 0.46961-0.74637 0.42611-0.74038-0.54175
  -6   0   0  163.72    6.84  26-0.46841-0.46768-0.75019 0.66402-0.73756 0.43179
  -5  -1  -9    8.93    7.10  26-0.45966-0.70931-0.75912 0.36173-0.73073-0.69869
  -5   1  -7    9.04   12.22  26-0.46193-0.59478-0.75683 0.68054-0.73251-0.39377
  -4   2  -6   30.77   11.00  25-0.45971-0.38806-0.75906 0.85987-0.73077-0.19572
  -4   2  -3   -1.58    8.03  26-0.45915-0.26272-0.75963 0.92284-0.73033 0.18760
  -2  -3 -12   -2.81    4.50  25-0.45952-0.39096-0.75925 0.06274-0.73063-0.97137
  -2   0 -11   -6.13    8.92  26-0.46415-0.30485-0.75457 0.49936-0.73424-0.77162
  -2   1 -10   16.65   10.35  26-0.46338-0.25350-0.75535 0.66372-0.73364-0.62768
   1   2  -7   76.30    5.87  26-0.46363 0.35231-0.75510 0.90970-0.73384-0.06763
   1   2  -6   30.23    5.24  26-0.46253 0.39372-0.75621 0.93062-0.73298 0.05987
  -8  -4  -4    1.29    5.14  27-0.47195-0.99574-0.74643-0.01537-0.74025-0.26859
  -8  -3  -4    1.07    6.42  27-0.47847-0.97605-0.73954 0.11878-0.74526-0.24109
  -7  -1   0   36.98    6.44  27-0.47231-0.63224-0.74605 0.50512-0.74052 0.36184
  -7   0  -3   51.03   10.58  27-0.47619-0.74018-0.74195 0.57833-0.74352 0.00265
  -6   0  -7   19.31   10.54  27-0.47462-0.75049-0.74362 0.51237-0.74231-0.45694
  -6   1  -4  221.72   10.17  26-0.46971-0.61972-0.74875 0.72207-0.73852-0.05670
  -6   1  -3  285.66    9.13  26-0.47010-0.57921-0.74835 0.74029-0.73882 0.07056
  -3  -1 -11   43.45    6.40  26-0.46910-0.47243-0.74939 0.34197-0.73804-0.84513
  -3   1   0   87.56    4.29  26-0.46848 0.01495-0.75004 0.84822-0.73756 0.60704
  -3   2  -8   39.97   12.41  26-0.47171-0.30178-0.74668 0.82043-0.74006-0.38825
  -3   2  -2   21.41    6.45  26-0.46922-0.05641-0.74927 0.94659-0.73813 0.37457
  -2  -2 -12   22.95    5.23  27-0.47851-0.36238-0.73949 0.18441-0.74529-0.93818
  -2   2  -2  402.93    6.19  27-0.47311 0.10339-0.74521 0.95735-0.74114 0.42694
  -1  -1 -12    1.08    6.54  27-0.47193-0.19786-0.74645 0.34629-0.74023-0.86862
  -1   2  -9   30.09   10.31  27-0.47378-0.03269-0.74451 0.82894-0.74166-0.41616
   2  -1  -1   29.45    1.55  26-0.47028 0.72946-0.74817 0.61712-0.73896 0.68817
   2   0 -11   85.15    5.11  27-0.47501 0.32755-0.74320 0.54810-0.74261-0.56496
   2   1  -4   26.13    1.81  29-0.49586 0.65352-0.72043 0.81203-0.75841 0.36985
   3   0 -10   69.07    3.68  29-0.49160 0.54133-0.72521 0.56811-0.75522-0.37526
  -8  -3   0    3.30    5.48  28-0.48488-0.80013-0.73242 0.19315-0.75018 0.27579
  -8  -2  -3    5.78    8.13  27-0.48163-0.91506-0.73595 0.27634-0.74771-0.08756
  -8  -2  -2   68.59    7.59  28-0.48304-0.87687-0.73442 0.29470-0.74878 0.04071
  -7  -4  -7   17.01    4.47  28-0.48468-0.95289-0.73264-0.07600-0.75003-0.59293
  -7  -3  -7    8.07    5.56  28-0.48835-0.94138-0.72861 0.06046-0.75281-0.57131
  -7  -1  -6    2.06    9.15  29-0.49121-0.87618-0.72545 0.36252-0.75496-0.39892
  -7   0  -4   85.46    9.11  28-0.48196-0.77640-0.73559 0.55255-0.74796-0.11956
  -7   0  -2    2.17    9.50  27-0.48198-0.69142-0.73557 0.59203-0.74798 0.13593
  -6  -1  -8    3.10    7.21  28-0.48165-0.80147-0.73593 0.34487-0.74772-0.60439
  -6   1  -5   28.80   10.18  27-0.47918-0.65185-0.73858 0.69128-0.74584-0.17798
  -6   1  -2   28.18    9.49  28-0.48549-0.52323-0.73176 0.74610-0.75064 0.21137
  -5   0   1    7.76    4.55  28-0.48131-0.25654-0.73630 0.68460-0.74747 0.62058
  -4   1   0  140.04    5.05  27-0.48103-0.12929-0.73660 0.82001-0.74725 0.56542
  -4   2  -7   24.09   10.80  27-0.48080-0.40712-0.73684 0.81911-0.74708-0.30767
  -4   2  -2   90.87    8.64  28-0.48785-0.19362-0.72917 0.91271-0.75243 0.33611
  -2   2  -9   50.04   11.22  28-0.48489-0.17724-0.73241 0.80283-0.75019-0.45714
   0   2  -9   19.19    6.86  27-0.48034 0.13014-0.73734 0.83681-0.74672-0.36109
   1   2  -8   21.59    6.15  28-0.48467 0.33339-0.73265 0.86880-0.75002-0.18110
   1   2  -5   15.79    4.53  28-0.48441 0.45691-0.73293 0.92618-0.74983 0.20650
   2  -1 -12    9.23    4.96  28-0.49219 0.28976-0.72436 0.36744-0.75570-0.69855
  -8  -2  -4    5.81    7.53  28-0.49391-0.94128-0.72262 0.24187-0.75699-0.20483
  -8  -2  -1   15.25    6.72  29-0.49424-0.82129-0.72226 0.30499-0.75723 0.17704
  -7  -2  -7   -4.20    6.61  29-0.49571-0.91330-0.72060 0.19379-0.75833-0.53797
  -7   0  -5   20.06   10.67  29-0.49776-0.80375-0.71827 0.51444-0.75986-0.23690
  -6   1  -6   62.97   11.87  29-0.49593-0.67398-0.72035 0.65172-0.75850-0.28955
  -5  -3 -10    3.21    3.84  28-0.48996-0.74622-0.72704 0.02767-0.75402-0.84730
  -5   0  -9  100.81    9.20  29-0.49679-0.66120-0.71938 0.46337-0.75913-0.64691
  -5   2  -5   30.98   10.39  28-0.49113-0.46817-0.72574 0.83387-0.75490-0.09395
  -5   2  -4   56.94    9.82  28-0.48931-0.42805-0.72776 0.85769-0.75353 0.03200
  -5   2  -3  211.05   10.67  29-0.49737-0.38225-0.71872 0.86567-0.75957 0.16462
  -4  -3 -11   -2.82    4.03  29-0.49640-0.62386-0.71982 0.01575-0.75885-0.92238
  -4   0 -10   -8.49    7.57  29-0.49297-0.54906-0.72368 0.46172-0.75628-0.72866
  -4   1  -9  140.07    9.40  28-0.48858-0.49728-0.72856 0.62988-0.75298-0.57968
  -3   1 -10   -6.71   10.16  29-0.49576-0.37311-0.72054 0.61664-0.75837-0.65306
   0   1 -11  -25.05    7.70  29-0.49734 0.05639-0.71875 0.63645-0.75955-0.62218
  -8  -3  -5   -7.31    5.54  30-0.50958-0.98655-0.70460 0.06324-0.76856-0.34576
  -7   0  -1  125.59    8.26  30-0.50611-0.62914-0.70868 0.58466-0.76602 0.28240
  -6  -3  -9    0.94    4.34  30-0.50727-0.84386-0.70731 0.01366-0.76688-0.75798
  -5  -2 -10    1.07    4.46  29-0.49978-0.72329-0.71600 0.15736-0.76135-0.81767
  -5   1  -8   83.12    9.31  29-0.49821-0.60331-0.71780 0.62244-0.76018-0.49582
  -5   2  -6   97.20   10.67  30-0.50292-0.49897-0.71239 0.79915-0.76367-0.21271
  -4  -2 -11    6.45    4.80  31-0.50862-0.60430-0.70572 0.14094-0.76787-0.89407
  -3   0 -11   11.20    7.98  29-0.50287-0.42148-0.71245 0.44296-0.76363-0.79271
  -2  -1 -12   -9.35    5.76  30-0.50619-0.31384-0.70858 0.29660-0.76608-0.89470
  -2   1   0   -1.50    3.30  30-0.50032 0.20098-0.71539 0.82772-0.76174 0.68291
  -2   3  -6   22.87   10.22  29-0.50369-0.01837-0.71149 0.97991-0.76424-0.03409
  -1   1 -11   15.04    7.14  29-0.50160-0.10041-0.71391 0.61589-0.76269-0.67435
   0   0 -12   60.11    6.52  30-0.50835 0.00659-0.70604 0.46224-0.76767-0.76775
   0   2  -3 1105.86    5.92  30-0.50958 0.40970-0.70460 0.92689-0.76856 0.42584
   1  -1   0  731.36    2.25  30-0.50779 0.65398-0.70670 0.58272-0.76726 0.79208
   2   1 -10  -19.95    5.30  31-0.51040 0.42352-0.70363 0.67226-0.76916-0.38466
  -8  -1  -3   -3.82    8.20  31-0.51944-0.86691-0.69284 0.37392-0.77574-0.03777
  -6  -2  -9    9.00    5.12  31-0.51519-0.82239-0.69800 0.14502-0.77267-0.72946
  -6   0  -8   -2.32    9.14  32-0.52135-0.75593-0.69050 0.44145-0.77711-0.55898
  -6   1  -1    8.97    8.18  31-0.51262-0.45143-0.70110 0.73382-0.77080 0.36003
  -5   1   0   82.71    6.44  31-0.51559-0.25255-0.69752 0.76470-0.77296 0.54065
  -4   2  -8   26.71   10.18  30-0.50871-0.42303-0.70574 0.76591-0.76795-0.41533
  -3   2  -9   -6.34    9.65  31-0.51038-0.30166-0.70376 0.76180-0.76917-0.49067
  -3   3  -6   14.71   12.54  30-0.51283-0.16415-0.70084 0.95311-0.77095-0.08093
  -2   3  -7  -16.13   10.86  31-0.51601-0.04565-0.69701 0.94960-0.77326-0.15590
  -2   3  -5   57.81    7.98  30-0.50953 0.02611-0.70476 0.99663-0.76855 0.09405
  -1   0 -12   -4.89    6.74  32-0.52122-0.13696-0.69066 0.43256-0.77701-0.81450
  -1   2 -10   -4.92    9.79  31-0.51656-0.02369-0.69635 0.76160-0.77366-0.50884
  -1   2  -2   -5.99    5.98  31-0.51629 0.30181-0.69668 0.92249-0.77346 0.51392
  -1   3  -7  -15.39    9.25  31-0.51712 0.11210-0.69567 0.96006-0.77406-0.10141
  -1   3  -6    0.12    8.67  31-0.51427 0.14559-0.69912 0.98520-0.77200 0.02104
   1   0 -12    8.39    5.93  31-0.51867 0.17342-0.69378 0.46217-0.77518-0.70695
   1   1 -11    1.23    6.38  31-0.51963 0.22950-0.69262 0.62434-0.77587-0.56054
   1   2  -9   12.86    6.56  30-0.51167 0.31799-0.70222 0.81590-0.77011-0.28579
  -8  -2  -5  -16.59    6.60  32-0.52546-0.95972-0.68543 0.18610-0.78003-0.32054
  -8  -2   0   29.87    6.06  32-0.52804-0.74624-0.68220 0.28394-0.78186 0.32957
  -8  -1  -4   85.37    8.59  32-0.52903-0.89966-0.68095 0.34210-0.78256-0.15835
  -8  -1  -2   42.10    8.01  32-0.52251-0.82238-0.68909 0.39150-0.77792 0.09199
  -7  -1  -7    5.93    6.35  31-0.52067-0.87722-0.69135 0.30566-0.77661-0.49869
  -7   0  -6  -22.15    8.28  32-0.52095-0.81979-0.69102 0.46890-0.77680-0.35217
  -6   1  -7    5.69    9.06  31-0.52139-0.69095-0.69048 0.59940-0.77712-0.40023
  -5  -1 -10    2.44    5.11  32-0.52202-0.68972-0.68969 0.27194-0.77758-0.78096
  -5   2  -7   96.46   10.28  32-0.52314-0.52380-0.68832 0.75344-0.77837-0.32483
  -5   2  -2   33.82    7.64  31-0.52020-0.31598-0.69193 0.86124-0.77627 0.30809
  -4  -1 -11   -2.03    5.63  32-0.52609-0.56345-0.68464 0.26408-0.78048-0.85661
  -3   3  -7  -22.83   11.73  32-0.52673-0.18995-0.68385 0.92035-0.78093-0.19840
  -3   3  -4   49.52   10.63  32-0.52651-0.06960-0.68412 0.98331-0.78077 0.18270
  -2   1 -11    0.62    7.68  31-0.51996-0.23814-0.69222 0.57934-0.77610-0.71156
  -2   2 -10   29.09   10.17  32-0.52916-0.17529-0.68078 0.73157-0.78265-0.55588
  -2   3  -4  242.21    9.22  32-0.52636 0.08629-0.68430 0.99660-0.78067 0.23334
  -1   3  -5    3.54    6.60  32-0.52385 0.19849-0.68744 0.99361-0.77888 0.15488
   0   2 -10   -6.98    8.37  32-0.52304 0.13157-0.68844 0.76649-0.77830-0.45791
  -8  -1  -1   84.88    8.22  33-0.54025-0.76311-0.66628 0.38977-0.79051 0.23277
  -7  -1   1   -1.14    5.22  33-0.53754-0.52578-0.66982 0.44722-0.78863 0.53812
  -7   1  -4   16.76   11.00  33-0.53637-0.71019-0.67135 0.62884-0.78782-0.05850
  -7   1  -3   69.55   10.81  33-0.53644-0.66743-0.67125 0.64905-0.78787 0.07038
  -6  -1  -9   12.82    6.14  33-0.53359-0.78991-0.67493 0.26295-0.78587-0.69295
  -6   2  -4   42.56   12.03  33-0.53818-0.53858-0.66900 0.78374-0.78907 0.01588
  -4   1 -10  -25.09    9.24  33-0.53583-0.48598-0.67204 0.55376-0.78744-0.67426
  -4   2  -1   32.09    7.62  33-0.53734-0.10148-0.67008 0.87379-0.78850 0.50290
  -3   2  -1  185.63    5.99  33-0.53178 0.04824-0.67724 0.89505-0.78461 0.54746
  -2   3  -8  107.76    9.78  33-0.53249-0.07728-0.67634 0.90653-0.78511-0.27145
  -1   3  -8  228.10    9.96  33-0.53332 0.08166-0.67528 0.92006-0.78569-0.22189
  -8  -1  -5   27.24    7.58  34-0.54509-0.92145-0.65973 0.30002-0.79387-0.27448
  -7   0   0   51.18    6.58  34-0.54639-0.54640-0.65798 0.55639-0.79476 0.43792
  -7   1  -5  -10.74   10.71  35-0.55012-0.74564-0.65295 0.59344-0.79730-0.18067
  -7   1  -2  235.43   10.20  34-0.54837-0.61447-0.65532 0.65393-0.79611 0.20536
  -6   0   1   15.12    5.03  34-0.54461-0.34929-0.66037 0.59565-0.79354 0.61623
  -6   2  -5    8.49   10.24  34-0.54101-0.57805-0.66514 0.75803-0.79107-0.11001
  -6   2  -3   74.21   11.13  34-0.54565-0.49250-0.65898 0.79422-0.79425 0.14785
  -5   1  -9    9.84    8.00  33-0.53832-0.60429-0.66866 0.55340-0.78921-0.59529
  -4   2  -9   51.54    9.24  34-0.54234-0.43303-0.66339 0.70379-0.79198-0.51649
  -4   3  -6  -32.85   10.88  34-0.53937-0.29381-0.66729 0.91250-0.78994-0.11436
  -3   3  -8   -1.11   12.24  34-0.54582-0.21143-0.65875 0.87513-0.79437-0.31252
  -2   0 -12    8.75    6.20  34-0.54224-0.27209-0.66351 0.39063-0.79192-0.84649
   0   3  -7   41.53    7.70  34-0.54336 0.28826-0.66204 0.94314-0.79268-0.03483
   0   3  -6   25.07    6.98  34-0.54634 0.33336-0.65805 0.95873-0.79473 0.09410
   1   2  -4   40.19    4.52  35-0.55002 0.56473-0.65309 0.86878-0.79723 0.38001
   3   1  -8   16.27    2.61  36-0.56641 0.71294-0.63012 0.65569-0.80813-0.04318
   3   1  -7    3.04    2.16  37-0.57556 0.76549-0.61668 0.66137-0.81403 0.09148
  -8  -3  -6   -9.32    4.38  35-0.55382-0.98558-0.64797-0.01294-0.79980-0.45134
  -8  -2  -6   -2.42    5.26  35-0.55739-0.96696-0.64301 0.12284-0.80219-0.41778
  -7  -2  -8    0.70    4.20  34-0.54871-0.90310-0.65494 0.10859-0.79636-0.62857
  -7   0  -7    1.92    7.15  34-0.55014-0.83257-0.65300 0.40820-0.79733-0.45410
  -6   1  -8   19.47    9.54  36-0.55781-0.70189-0.64243 0.53430-0.80247-0.50711
  -6   2  -6  -11.47   11.87  35-0.55420-0.60516-0.64743 0.72307-0.80006-0.23151
  -5   0 -10   27.13    5.72  34-0.54995-0.64760-0.65327 0.37688-0.79719-0.73759
  -5   2  -8   12.97    9.16  35-0.55069-0.53745-0.65225 0.69810-0.79770-0.43649
  -4   0 -11  -10.50    6.34  35-0.55475-0.52189-0.64669 0.36698-0.80043-0.81284
  -4   3  -7   -2.40   10.54  35-0.55055-0.32240-0.65245 0.87538-0.79760-0.23365
  -3  -1 -12    7.93    4.15  35-0.55102-0.43178-0.65180 0.22264-0.79792-0.91432
  -3   1 -11   -9.81    6.76  35-0.55025-0.35678-0.65285 0.52871-0.79740-0.74042
  -3   2 -10   -4.43    8.69  35-0.55025-0.30273-0.65285 0.68950-0.79740-0.58932
  -3   3  -3   35.20    7.84  34-0.54949-0.00225-0.65389 0.97199-0.79688 0.32763
  -1  -2   2  218.23    1.84  35-0.55313 0.45642-0.64892 0.39494-0.79934 0.95912
  -1   3  -4   65.22    6.32  34-0.55006 0.26524-0.65311 0.97991-0.79727 0.30081
   0   3  -8    7.62    7.88  35-0.55317 0.25697-0.64886 0.90888-0.79937-0.15646
   1   2 -10   -1.38    6.49  36-0.55743 0.32278-0.64295 0.73899-0.80222-0.38644
   2   2  -7   -0.79    4.06  37-0.56856 0.61533-0.62709 0.80066-0.80954 0.06049
  -8   0  -4   -6.55    9.08  35-0.55950-0.84727-0.63961 0.44027-0.80358-0.11326
  -8   0  -3  116.06    8.86  36-0.56061-0.81291-0.63805 0.46069-0.80431 0.01175
  -7  -2   2   -2.00    2.68  38-0.57822-0.45604-0.61234 0.26940-0.81570 0.67143
  -7  -1  -8   -0.12    5.62  36-0.56487-0.87413-0.63198 0.22742-0.80711-0.59581
  -7   1  -6   14.55    9.78  36-0.56395-0.76827-0.63329 0.55160-0.80652-0.29750
  -6   0  -9   -1.92    6.62  36-0.56280-0.75045-0.63494 0.36522-0.80575-0.65337
  -6   1   0   54.13    6.98  36-0.56165-0.36029-0.63658 0.69196-0.80500 0.52171
  -6   2  -2   -4.06    9.84  36-0.56096-0.43136-0.63754 0.79091-0.80455 0.28760
  -5   2  -1   77.93    6.93  35-0.55933-0.23553-0.63984 0.82949-0.80347 0.46584
  -5   3  -5  -16.79   12.78  36-0.56347-0.38604-0.63398 0.88257-0.80620-0.02159
  -4   3  -3    6.04    8.81  35-0.55829-0.15174-0.64130 0.94498-0.80278 0.28224
  -2   2  -1 1784.03    6.67  35-0.55783 0.22928-0.64195 0.87573-0.80247 0.61551
  -2   3  -9    9.44    8.80  35-0.55932-0.08965-0.63985 0.85092-0.80346-0.38374
  -2   3  -3  593.16    7.47  35-0.55958 0.15999-0.63950 0.97282-0.80363 0.38284
  -1   2 -11   -7.53    8.28  36-0.56473-0.01791-0.63218 0.67705-0.80702-0.60294
  -1   3  -9   11.02    8.26  35-0.55844 0.06544-0.64109 0.86697-0.80287-0.33368
   0   1 -12   29.82    6.86  36-0.56884 0.07833-0.62623 0.52529-0.80970-0.70367
   0   3  -5   18.12    6.77  36-0.56680 0.39640-0.62920 0.95079-0.80838 0.23543
   1   0  -1  104.35    0.60  37-0.57348 0.68948-0.61941 0.61589-0.81269 0.73310
   2   2  -8   -7.04    3.98  36-0.56388 0.57112-0.63340 0.78218-0.80647-0.06630
  -8  -1  -6    5.11    6.06  37-0.57585-0.93661-0.61571 0.23813-0.81414-0.38438
  -8  -1   0    4.24    6.43  37-0.57385-0.68563-0.61869 0.36246-0.81287 0.38288
  -8   0  -2  -10.21    6.95  37-0.56836-0.76433-0.62676 0.47311-0.80932 0.14209
  -7   1  -1    8.14    8.34  37-0.57347-0.54674-0.61926 0.64002-0.81262 0.35028
  -6   2  -7   -0.52   11.08  38-0.57555-0.63135-0.61615 0.67242-0.81395-0.34664
  -5   3  -6   55.93   10.88  37-0.56956-0.42177-0.62501 0.85463-0.81010-0.14378
  -5   3  -4   22.44   10.23  36-0.56747-0.34097-0.62805 0.89861-0.80875 0.10875
  -4   3  -8   15.28   12.13  38-0.57680-0.34814-0.61429 0.82396-0.81474-0.35285
  -3   3  -9  -13.59   11.24  37-0.57347-0.22648-0.61926 0.81776-0.81262-0.42352
  -2   2 -11   -5.27    8.88  37-0.57547-0.17021-0.61628 0.64599-0.81390-0.65127
  -1   1 -12   -3.95    6.25  37-0.57180-0.06622-0.62172 0.50787-0.81155-0.75467
   0   1  -1  228.33    1.97  37-0.56896 0.54026-0.62589 0.74876-0.80971 0.70146
   0   2 -11    0.59    7.30  37-0.57307 0.14558-0.61985 0.68013-0.81236-0.54816
   0   3  -9    4.39    8.54  36-0.56867 0.23125-0.62630 0.86049-0.80953-0.27102
   2   1 -11   -0.23    4.80  37-0.57563 0.44075-0.61604 0.56270-0.81400-0.47072
   3   1  -9   -4.94    2.90  40-0.59465 0.70100-0.58653 0.58954-0.82579-0.15289
  -8   0  -5    2.51    6.91  38-0.57877-0.87835-0.61127 0.39500-0.81592-0.23188
  -5   3  -7   66.18   12.09  38-0.58230-0.45003-0.60590 0.81423-0.81814-0.26370
  -5   3  -3  -20.20   10.94  38-0.58156-0.28367-0.60702 0.89998-0.81768 0.24575
  -4   2 -10   38.94    9.21  38-0.58096-0.43241-0.60794 0.62773-0.81730-0.61944
  -3   0 -12   -5.08    5.02  38-0.58109-0.38273-0.60774 0.32388-0.81739-0.87495
  -2   1 -12    5.83    6.47  38-0.58480-0.21566-0.60204 0.47103-0.81970-0.79619
   2   2  -9   23.52    4.79  38-0.58460 0.54593-0.60235 0.73170-0.81958-0.18630
   2   2  -6  -11.90    3.43  39-0.58871 0.67629-0.59593 0.78568-0.82212 0.20007
  -8   0  -1   10.50    7.51  39-0.58944-0.70215-0.59472 0.46006-0.82261 0.28718
  -7   0  -8   -9.05    6.24  39-0.59020-0.83417-0.59351 0.33311-0.82307-0.56300
  -7   1  -7  -23.44    7.38  39-0.58669-0.78084-0.59903 0.49964-0.82092-0.41206
  -7   2  -4   21.70   11.04  39-0.58858-0.64230-0.59607 0.69498-0.82208-0.00131
  -5  -1 -11   -9.08    3.90  39-0.59173-0.65405-0.59108 0.15726-0.82401-0.86355
  -5   1 -10   36.93    6.14  38-0.58507-0.60158-0.60154 0.46949-0.81992-0.69051
  -5   2  -9   87.03    7.84  38-0.58412-0.54834-0.60302 0.63156-0.81933-0.54002
  -4   1 -11   -9.05    6.54  39-0.59048-0.47366-0.59307 0.45608-0.82324-0.76768
  -4   1   1   18.25    4.62  39-0.59355 0.02675-0.58818 0.69402-0.82511 0.77151
  -4   3  -2  457.82    9.90  39-0.58982-0.08128-0.59412 0.91859-0.82284 0.42900
  -3   3  -2   72.69    8.54  39-0.59034 0.07846-0.59330 0.93364-0.82316 0.48090
  -2   3 -10   28.01   10.00  39-0.59205-0.10044-0.59057 0.78300-0.82420-0.48964
  -1   3 -10   -3.44    9.35  40-0.59494 0.05876-0.58595 0.79695-0.82594-0.44379
   1   1 -12    7.29    5.50  39-0.59343 0.25963-0.58837 0.50120-0.82503-0.63845
  -9  -2  -3    2.71    5.54  39-0.59685-0.94968-0.58262 0.11110-0.82710-0.05813
  -9  -2  -2   -1.05    5.42  39-0.59772-0.90756-0.58121 0.12979-0.82761 0.06947
  -8   0  -6  -21.26    6.86  40-0.59967-0.89563-0.57801 0.34383-0.82877-0.35141
  -7   2  -5   46.42    9.58  39-0.59448-0.67939-0.58646 0.66832-0.82567-0.12540
  -7   2  -3   26.81    8.70  40-0.59494-0.59675-0.58571 0.70717-0.82595 0.12984
  -6  -1 -10    5.71    3.88  40-0.59757-0.77029-0.58145 0.15164-0.82753-0.78216
  -6   1  -9   50.57    5.98  39-0.59475-0.70603-0.58602 0.45917-0.82583-0.60670
  -6   2  -8   -3.72    9.50  40-0.59890-0.64559-0.57928 0.61359-0.82831-0.45715
  -6   2  -1   73.91    7.36  39-0.59359-0.35787-0.58790 0.76507-0.82513 0.43512
  -6   3  -5   12.35   12.43  40-0.60028-0.50574-0.57701 0.81261-0.82913-0.04928
  -5   1   1   15.37    5.18  40-0.60276-0.12264-0.57290 0.66380-0.83059 0.72588
  -4   3  -9    8.17   10.69  40-0.59809-0.36298-0.58060 0.76544-0.82784-0.45934
  -3   2 -11    2.33    7.87  39-0.59495-0.30479-0.58570 0.59985-0.82595-0.68688
  -3   4  -6   26.62   12.28  40-0.59806-0.06800-0.58066 0.98092-0.82781 0.00017
  -2   4  -7  -17.16   10.82  40-0.59955 0.05074-0.57822 0.97155-0.82870-0.07735
  -2   4  -6  -24.69   10.50  40-0.59913 0.09091-0.57890 0.99339-0.82845 0.04944
  -1   3  -3   34.51    5.95  40-0.59573 0.35209-0.58444 0.93229-0.82642 0.45906
   1   1  -2  423.13    1.90  41-0.60680 0.69345-0.56612 0.68325-0.83294 0.64665
   1   2 -11   -2.84    6.69  41-0.60309 0.33255-0.57235 0.64710-0.83079-0.47784
   1   3  -8    3.93    6.07  41-0.60226 0.46313-0.57373 0.85093-0.83030-0.07724
   1   3  -7   56.86    5.88  40-0.59968 0.50178-0.57800 0.87465-0.82878 0.04967
  -8   1  -4    5.54    8.93  42-0.60922-0.80005-0.56213 0.50991-0.83431-0.06572
  -8   1  -3   -8.44    9.02  41-0.60670-0.75651-0.56643 0.53506-0.83286 0.05825
  -7   0   1    6.87    5.72  43-0.61639-0.43929-0.54967 0.47167-0.83836 0.61229
  -7   2  -6   -1.33   10.02  40-0.60357-0.70814-0.57168 0.62899-0.83104-0.24680
  -7   2  -2   31.50   10.16  41-0.60940-0.53968-0.56182 0.70362-0.83441 0.26684
  -6   3  -6    8.01   11.89  41-0.60659-0.54011-0.56660 0.78089-0.83280-0.17401
  -6   3  -4   -9.63   10.06  40-0.60123-0.46264-0.57558 0.83141-0.82966 0.07867
  -5   3  -8  -10.65    9.15  41-0.60361-0.46678-0.57162 0.76330-0.83106-0.38152
  -5   3  -2   38.19    7.92  41-0.60476-0.22082-0.56970 0.87951-0.83173 0.38755
  -4   2   0   45.78    6.70  41-0.60595 0.00927-0.56770 0.79286-0.83242 0.67271
  -3   3 -10    1.55    9.72  42-0.60951-0.23995-0.56164 0.74223-0.83447-0.53630
  -3   4  -7   14.70    9.67  41-0.60337-0.10417-0.57203 0.95359-0.83092-0.12637
  -2   4  -5   -7.58   10.17  41-0.60778 0.13860-0.56459 0.99886-0.83348 0.18039
   0   3 -10    3.77    7.98  41-0.60511 0.22580-0.56911 0.79016-0.83193-0.38250
   0   3  -4   -9.02    6.30  40-0.60337 0.47436-0.57203 0.91103-0.83092 0.38604
  -9  -2  -4   -2.26    4.74  42-0.61569-0.97986-0.55101 0.05844-0.83793-0.17699
  -8  -1  -7   -1.04    4.09  42-0.61199-0.93907-0.55746 0.16226-0.83585-0.49616
  -8   1  -5   32.12    8.55  42-0.61334-0.82927-0.55512 0.48009-0.83661-0.18881
  -8   1  -2  392.64    9.47  42-0.61430-0.70669-0.55345 0.53369-0.83715 0.19531
  -7   1   0   17.54    7.12  42-0.61300-0.46493-0.55571 0.59591-0.83642 0.50171
  -6   0 -10    0.59    4.33  42-0.61426-0.73807-0.55352 0.26490-0.83713-0.74721
  -6   3  -3   -7.82    9.14  41-0.61115-0.41104-0.55893 0.83508-0.83537 0.21239
  -5   0 -11   -3.46    3.89  42-0.61224-0.62104-0.55704 0.26564-0.83599-0.82960
  -5   2   0  -10.08    6.94  42-0.61545-0.13988-0.55144 0.76278-0.83779 0.62657
  -4   4  -7   28.78   12.28  42-0.61614-0.24949-0.55022 0.91460-0.83818-0.17273
  -4   4  -6  -27.91   10.41  42-0.61062-0.20983-0.55984 0.94806-0.83507-0.04735
  -3   1 -12    7.68    5.15  42-0.61339-0.34366-0.55503 0.41002-0.83664-0.83047
  -3   1   1   22.50    3.93  42-0.61897 0.20900-0.54521 0.66440-0.83975 0.83729
  -3   4  -8  -24.53   11.68  42-0.61558-0.13063-0.55121 0.91250-0.83787-0.24913
  -2   3  -2 1867.30    8.07  41-0.61118 0.25311-0.55886 0.91392-0.83539 0.54272
  -2   4  -8    3.76    9.31  42-0.61172 0.01633-0.55795 0.93384-0.83569-0.20296
  -1   4  -7   21.54    7.75  41-0.61192 0.21485-0.55759 0.96519-0.83581-0.02220
  -1   4  -6   22.79    9.08  42-0.61553 0.26028-0.55129 0.97942-0.83784 0.10768
   1   3  -9   16.69    6.42  42-0.61672 0.43400-0.54920 0.80675-0.83850-0.19705
   1   3  -6   79.29    5.39  42-0.61383 0.55737-0.55427 0.87056-0.83689 0.18371
   2   2 -10    8.23    4.50  43-0.62300 0.54351-0.53795 0.64843-0.84195-0.29387
  -9  -1  -3   -3.79    5.51  42-0.61972-0.91989-0.54362 0.21308-0.84009-0.02455
  -9  -1  -2   -3.20    6.21  44-0.63076-0.87623-0.52335 0.21313-0.84600 0.10831
  -8   0   0    0.57    6.21  43-0.62442-0.62323-0.53511 0.42210-0.84264 0.43509
  -7   1  -8    9.74    5.58  43-0.61945-0.79473-0.54411 0.42368-0.83994-0.51960
  -6   3  -7  -18.68    8.95  43-0.62074-0.56354-0.54179 0.73903-0.84065-0.29536
  -5   2 -10   46.79    7.42  43-0.62290-0.55150-0.53788 0.54667-0.84182-0.64617
  -3   2   0   -5.01    4.91  43-0.61999 0.17666-0.54314 0.78152-0.84023 0.73194
  -1   1   0  771.42    2.84  42-0.62005 0.47790-0.54303 0.67189-0.84027 0.80949
  -1   2 -12  -10.33    6.47  42-0.61972-0.01179-0.54362 0.56729-0.84009-0.69956
  -1   4  -8   72.26    8.37  42-0.61878 0.17990-0.54531 0.93393-0.83957-0.14608
   0   2  -2 1614.03    4.81  42-0.61923 0.56118-0.54451 0.78834-0.83981 0.62550
   3   1  -6   -1.62    1.11  48-0.66122 0.89209-0.46136 0.52379-0.86050 0.26816
  -9  -1  -4    3.27    5.03  44-0.62913-0.95429-0.52637 0.17578-0.84517-0.14779
  -8   0  -7   -2.46    5.15  44-0.63132-0.90743-0.52225 0.26858-0.84632-0.46418
  -8   1  -6   17.91    7.41  44-0.63196-0.85556-0.52103 0.42733-0.84665-0.30777
  -7   2  -7   15.10    7.35  44-0.62759-0.73418-0.52923 0.57113-0.84436-0.36677
  -6   1   1   36.67    5.55  44-0.63070-0.25058-0.52341 0.59882-0.84599 0.69072
  -6   2  -9    7.63    7.27  44-0.63231-0.65615-0.52036 0.53587-0.84683-0.56802
  -6   3  -2   43.07   10.33  44-0.63078-0.34962-0.52326 0.82087-0.84604 0.35072
  -5   3  -9    2.50    8.80  44-0.63035-0.48740-0.52408 0.69423-0.84581-0.49511
  -5   4  -6    4.69   12.67  43-0.62817-0.34838-0.52816 0.89607-0.84466-0.08819
  -5   4  -5   14.74   10.88  43-0.62795-0.30824-0.52856 0.91879-0.84455 0.03870
  -4   2 -11   -2.29    6.53  45-0.63525-0.42922-0.51475 0.52147-0.84834-0.72931
  -4   3 -10   31.81    9.26  44-0.63142-0.37283-0.52205 0.68669-0.84637-0.57263
  -4   4  -8    4.72   11.59  44-0.63132-0.27660-0.52225 0.86934-0.84631-0.29446
  -2   2 -12   14.12    6.25  44-0.63004-0.15772-0.52465 0.53551-0.84565-0.74733
  -2   3 -11   43.15    8.73  44-0.62963-0.10388-0.52543 0.69644-0.84543-0.59635
  -2   4  -9   27.12    8.88  43-0.62759-0.00958-0.52923 0.88308-0.84436-0.32051
  -2   4  -4   26.53    7.84  43-0.62759 0.20021-0.52923 0.98393-0.84436 0.32103
  -1   2  -1 2143.27    5.73  44-0.62786 0.45619-0.52872 0.77799-0.84450 0.70763
  -1   3 -11   18.18    8.11  44-0.62926 0.05175-0.52612 0.71328-0.84524-0.54816
  -1   4  -9   30.09    9.72  44-0.63152 0.15099-0.52187 0.88696-0.84642-0.26589
  -1   4  -5   62.54    8.59  44-0.62967 0.31426-0.52535 0.97392-0.84546 0.24529
   0  -2   1  591.07    2.44  43-0.62568 0.64363-0.53277 0.27303-0.84334 0.92569
   0   2 -12   -7.76    5.77  44-0.63119 0.16439-0.52249 0.56379-0.84625-0.64181
   3   1 -10   39.12    2.72  47-0.65056 0.71234-0.48413 0.47015-0.85579-0.25091
  -9  -1  -1    2.36    5.64  45-0.64235-0.81444-0.50075 0.21085-0.85194 0.24257
  -8   1  -1   -5.94    7.95  45-0.63613-0.64052-0.51294 0.51978-0.84884 0.33503
  -7  -1   2   19.09    2.78  45-0.64030-0.37728-0.50481 0.30429-0.85093 0.72653
  -7   0  -9   -1.88    3.76  45-0.63603-0.83354-0.51313 0.23198-0.84879-0.66147
  -7   2  -1   52.10    7.20  44-0.63487-0.47184-0.51537 0.67838-0.84820 0.40856
  -6   2   0   -0.11    7.55  46-0.64255-0.27149-0.50035 0.70112-0.85203 0.59269
  -5   1 -11   -3.79    4.69  45-0.63843-0.58882-0.50849 0.35652-0.85000-0.79088
  -5   4  -7   11.04   11.84  45-0.63877-0.38229-0.50781 0.85970-0.85017-0.21219
  -5   4  -4   30.76   10.42  44-0.63523-0.25859-0.51469 0.92753-0.84838 0.17216
  -4   3  -1  322.97    7.10  44-0.63457 0.00650-0.51595 0.86254-0.84805 0.58164
  -3   4  -9   17.92    8.97  44-0.63428-0.15852-0.51650 0.85669-0.84790-0.36846
   0   3 -11   -4.60    7.97  45-0.64206 0.22024-0.50131 0.70308-0.85180-0.48973
   1   3 -10   21.49    6.05  45-0.63927 0.41443-0.50682 0.74188-0.85042-0.31071
  -9  -1  -5   -4.54    4.62  46-0.64709-0.97688-0.49113 0.12273-0.85423-0.27462
  -9   0  -3   -1.92    6.40  46-0.64670-0.88304-0.49194 0.30333-0.85404 0.01083
  -8   2  -4    3.33    9.26  46-0.64551-0.74342-0.49436 0.58179-0.85347-0.02217
  -8   2  -3   51.14    9.47  46-0.64713-0.69793-0.49106 0.59767-0.85425 0.10733
  -7   3  -5    9.26    9.16  45-0.64232-0.62032-0.50077 0.72393-0.85193-0.07875
  -7   3  -4   34.28    9.41  45-0.64120-0.57936-0.50299 0.74552-0.85138 0.04997
  -7   3  -3    9.73   10.96  47-0.64955-0.52816-0.48609 0.75363-0.85538 0.18246
  -6   1 -10  -10.22    4.08  46-0.64181-0.69461-0.50179 0.35889-0.85168-0.71693
  -6   3  -8    1.18    7.79  45-0.64174-0.58971-0.50191 0.67827-0.85165-0.41160
  -5   3  -1   -6.17    7.15  45-0.64120-0.14170-0.50299 0.83513-0.85138 0.53508
  -3   3 -11   -5.17    7.65  45-0.64282-0.24507-0.49977 0.65614-0.85218-0.63866
  -3   3  -1  -10.40    6.21  46-0.64429 0.17330-0.49682 0.85729-0.85289 0.63854
  -3   4  -3   38.70    8.46  45-0.64137 0.10095-0.50266 0.96487-0.85147 0.40157
   0   4  -8   38.27    8.09  46-0.64560 0.36288-0.49418 0.89935-0.85352-0.08293
   0   4  -7   21.98    6.45  45-0.64264 0.40142-0.50013 0.92418-0.85209 0.04765
   1   3  -5   12.47    4.93  46-0.64600 0.63089-0.49337 0.82985-0.85371 0.33076
   2   2  -5   94.91    2.91  47-0.65234 0.78126-0.48028 0.69239-0.85667 0.36172
  -9   0  -4   12.86    5.75  47-0.65087-0.92081-0.48335 0.27464-0.85598-0.11552
  -9   0  -2   -0.50    6.24  47-0.65309-0.83484-0.47870 0.31035-0.85699 0.14182
  -8   1  -7   -4.32    5.46  47-0.65421-0.86891-0.47635 0.36439-0.85750-0.42896
  -8   2  -5    6.54    7.59  46-0.65024-0.77959-0.48466 0.55173-0.85568-0.14766
  -7   2  -8    2.24    5.87  46-0.65041-0.74838-0.48432 0.50490-0.85576-0.47965
  -7   3  -6    0.97    8.47  46-0.64960-0.65376-0.48598 0.68833-0.85539-0.20286
  -6   4  -5  -25.29   12.21  47-0.65400-0.43538-0.47678 0.85624-0.85740-0.00090
  -5   4  -8   15.34   10.87  47-0.65239-0.40976-0.48017 0.81053-0.85667-0.33142
  -5   4  -3   60.80    9.86  46-0.64980-0.20280-0.48557 0.91957-0.85548 0.30428
  -4   4  -9   34.05    8.68  46-0.65015-0.29896-0.48486 0.81170-0.85564-0.40957
  -3   2 -12    1.74    5.20  47-0.65379-0.29254-0.47723 0.47580-0.85731-0.79168
  -2   4 -10  -18.57    9.44  46-0.65013-0.02818-0.48489 0.81679-0.85563-0.43545
  -1   4 -10  -16.12    9.00  47-0.65441 0.13889-0.47591 0.82289-0.85759-0.37912
   0   4  -9   11.35    8.22  47-0.65449 0.32991-0.47574 0.85820-0.85763-0.20416
   0   4  -6   12.95    7.30  47-0.65371 0.45472-0.47741 0.92383-0.85727 0.17694
   1   2  -3   60.05    3.31  47-0.65573 0.71226-0.47310 0.71072-0.85818 0.56779
  -8   2  -2   28.99    9.25  48-0.65892-0.64509-0.46632 0.59295-0.85957 0.24019
  -7   1  -9   -5.92    4.10  48-0.65756-0.79298-0.46928 0.33173-0.85898-0.63274
  -6   3  -1   29.25    9.24  48-0.65978-0.27956-0.46445 0.78211-0.85994 0.49229
  -6   4  -6   18.72    9.76  48-0.65752-0.47726-0.46936 0.82668-0.85896-0.12685
  -6   4  -4  107.58   10.55  47-0.65750-0.39198-0.46940 0.86729-0.85895 0.12944
  -5   3 -10   35.47    7.11  48-0.66188-0.49970-0.45983 0.61288-0.86084-0.60277
  -3   4 -10   13.11    9.48  48-0.65870-0.17544-0.46680 0.78718-0.85948-0.48317
  -2   4  -3  167.23    7.65  48-0.65765 0.27125-0.46908 0.94401-0.85901 0.46184
  -1   3  -2 3893.85    8.58  48-0.65789 0.45663-0.46856 0.83842-0.85912 0.61606
  -1   4  -4   49.22    6.65  47-0.65593 0.38350-0.47276 0.94243-0.85826 0.38360
   1   2 -12   -6.67    4.87  49-0.66369 0.35289-0.45581 0.51148-0.86160-0.57485
   2   2 -11   48.32    4.47  49-0.66769 0.54244-0.44677 0.53844-0.86324-0.39872
  -9   0  -5   -8.12    4.70  50-0.67068-0.95319-0.43962 0.21136-0.86436-0.23957
  -9   0  -1  -12.68    6.39  49-0.67037-0.77461-0.44035 0.29138-0.86423 0.27716
  -8   1   0   31.02    6.76  49-0.66877-0.56462-0.44406 0.47160-0.86360 0.47797
  -8   2  -6   -0.47    6.22  48-0.66301-0.80941-0.45710 0.50424-0.86125-0.27074
  -7   1   1    9.81    5.58  50-0.66975-0.36771-0.44178 0.50324-0.86399 0.65770
  -7   3  -7   -1.78    7.27  49-0.66416-0.67742-0.45452 0.63979-0.86173-0.32859
  -7   3  -2    3.83    8.76  48-0.66276-0.47364-0.45764 0.74076-0.86115 0.31431
  -6   3  -9    1.99    6.98  48-0.66592-0.60439-0.45056 0.60501-0.86246-0.52657
  -6   4  -7   34.96   10.40  49-0.66716-0.50908-0.44775 0.78593-0.86296-0.25115
  -6   4  -3   -2.38   12.00  48-0.66402-0.33907-0.45484 0.86508-0.86167 0.25995
  -5   2 -11   -2.32    4.76  49-0.66777-0.53753-0.44635 0.43787-0.86321-0.75670
  -4   3 -11    4.70    6.31  49-0.66706-0.37665-0.44796 0.59143-0.86292-0.68036
  -4   4  -2   25.24   10.41  49-0.66693 0.01279-0.44826 0.91578-0.86287 0.49107
  -3   5  -7   10.65   12.17  49-0.66628-0.02988-0.44975 0.97169-0.86260-0.07613
  -3   5  -6  -11.66    9.51  49-0.66481 0.01477-0.45305 0.99355-0.86200 0.05343
  -2   2   0  415.51    4.90  49-0.66533 0.37890-0.45189 0.70661-0.86222 0.80288
   0   3  -3   87.09    4.79  48-0.66375 0.57694-0.45543 0.81857-0.86156 0.54468
  -9   1  -4   11.54    6.20  50-0.67527-0.88178-0.42885 0.36120-0.86611-0.08324
  -9   1  -3    6.94    6.88  51-0.67621-0.84313-0.42659 0.37955-0.86646 0.04483
  -8   0   1   21.16    4.89  50-0.67635-0.52819-0.42625 0.33127-0.86651 0.58602
  -7   2   0   11.92    6.28  50-0.67081-0.39545-0.43937 0.62183-0.86443 0.55182
  -6   2 -10   -9.21    4.47  50-0.67015-0.65195-0.44092 0.43958-0.86417-0.68203
  -5   4  -9   16.16    9.27  50-0.67402-0.43133-0.43181 0.74410-0.86565-0.45405
  -5   4  -2   11.19    8.84  49-0.67101-0.13992-0.43891 0.89027-0.86450 0.44154
  -4   5  -7   78.94   12.28  50-0.67206-0.17936-0.43645 0.94283-0.86491-0.12285
  -4   5  -6    4.19   10.57  50-0.67069-0.14041-0.43966 0.96956-0.86438 0.00198
  -4   5  -5   -5.91   13.23  50-0.67254-0.09532-0.43534 0.98173-0.86509 0.13156
  -3   4  -2  658.57   10.24  50-0.67435 0.17239-0.43103 0.91275-0.86578 0.54427
  -3   5  -8   14.41   11.64  49-0.67132-0.06543-0.43818 0.93550-0.86462-0.19987
  -3   5  -5    4.86   10.42  50-0.67223 0.05969-0.43605 0.99875-0.86497 0.18218
  -2   3 -12   -3.64    5.90  49-0.67069-0.10247-0.43966 0.58898-0.86438-0.69940
  -2   3  -1   62.98    7.18  50-0.67429 0.36128-0.43117 0.80506-0.86575 0.70206
  -2   5  -8  181.66   11.21  50-0.67450 0.09061-0.43068 0.94780-0.86583-0.14898
  -2   5  -7   30.91    9.43  49-0.66966 0.12902-0.44205 0.97873-0.86398-0.02288
  -2   5  -6    8.07    9.00  50-0.67191 0.17349-0.43681 0.99323-0.86485 0.10509
  -1   3 -12    6.16    6.08  50-0.67267 0.05319-0.43501 0.60197-0.86514-0.65407
   0   4 -10   -2.13    7.60  51-0.67715 0.31078-0.42430 0.79143-0.86680-0.32768
   0   4  -5    8.29    7.14  50-0.67288 0.51554-0.43452 0.89976-0.86522 0.31312
   1   3 -11  -19.62    6.11  51-0.67699 0.42002-0.42469 0.64118-0.86674-0.41888
  -9   1  -2   44.12    6.99  51-0.68270-0.79283-0.41071 0.38281-0.86870 0.17587
  -8   2  -1   85.20    8.60  51-0.67915-0.58555-0.41954 0.56437-0.86749 0.37566
  -5   2   1    6.38    6.00  51-0.67958-0.02999-0.41846 0.64637-0.86764 0.78271
  -4   2 -12   12.99    4.47  51-0.68036-0.41845-0.41656 0.39885-0.86791-0.82541
  -4   4 -10   11.89    7.17  50-0.67559-0.31546-0.42817 0.73576-0.86621-0.52736
  -2   4 -11   47.67    8.02  51-0.68147-0.04210-0.41379 0.73100-0.86829-0.55042
   2  -1  -2  250.30    1.96  51-0.68144 0.89927-0.41386 0.26314-0.86828 0.69000
   2   3  -8    9.76    4.38  51-0.68122 0.69626-0.41441 0.70503-0.86821 0.01272
  -9   1  -5    1.81    5.24  53-0.68914-0.91844-0.39428 0.30699-0.87079-0.20978
  -8   2  -7    6.93    4.86  51-0.68242-0.83260-0.41155 0.43854-0.86865-0.39188
  -8   3  -5  -19.06    8.97  52-0.68647-0.72988-0.40122 0.61252-0.86997-0.11731
  -8   3  -4   12.09    7.68  52-0.68379-0.69249-0.40808 0.63619-0.86911 0.01496
  -8   3  -3   -0.22    9.65  52-0.68858-0.64707-0.39574 0.64486-0.87062 0.14455
  -7   2  -9    1.97    4.07  51-0.68291-0.75886-0.41031 0.41112-0.86882-0.59596
  -7   3  -8    1.38    5.49  51-0.68339-0.70243-0.40910 0.57027-0.86898-0.44494
  -7   3  -1    9.88    9.36  51-0.68339-0.40830-0.40910 0.70925-0.86898 0.44904
  -7   4  -5   22.13   10.79  52-0.68558-0.56471-0.40353 0.76872-0.86969-0.03980
  -7   4  -4   67.59   11.28  52-0.68576-0.52083-0.40306 0.78625-0.86974 0.08985
  -6   4  -8    2.00    7.24  52-0.68339-0.53736-0.40910 0.72825-0.86898-0.37446
  -6   4  -2   25.69   10.74  52-0.68573-0.28127-0.40313 0.84173-0.86974 0.39536
  -5   3   0   17.87    7.89  51-0.68369-0.05491-0.40834 0.75856-0.86908 0.67834
  -5   5  -7    2.32   11.47  53-0.68944-0.32229-0.39349 0.89220-0.87087-0.17274
  -5   5  -6   11.13   10.19  51-0.68246-0.28408-0.41145 0.92543-0.86867-0.04442
  -5   5  -5   -2.48   10.72  52-0.68318-0.23733-0.40964 0.94461-0.86891 0.08415
  -4   2   1   41.78    5.76  52-0.68706 0.13311-0.39969 0.64381-0.87015 0.83736
  -4   3   0  314.30    7.97  52-0.68727 0.10148-0.39917 0.76557-0.87022 0.73154
  -4   5  -8   54.78    9.37  51-0.68198-0.21288-0.41264 0.90104-0.86851-0.24793
  -3   5  -9  -11.49   10.63  52-0.68654-0.09355-0.40105 0.88273-0.86999-0.32482
  -2   5  -9   40.09   10.36  53-0.68776 0.06245-0.39788 0.89926-0.87037-0.27448
  -2   5  -5   68.30    8.79  51-0.68208 0.22712-0.41241 0.98970-0.86854 0.23807
  -1   4 -11   48.90    7.84  52-0.68596 0.11973-0.40255 0.73355-0.86981-0.50292
  -1   5  -8   25.23   10.05  53-0.68788 0.26187-0.39758 0.93152-0.87040-0.09584
  -1   5  -7   15.59    7.92  51-0.68374 0.29933-0.40823 0.95727-0.86909 0.03280
   0   3 -12   -6.81    5.19  52-0.68664 0.23329-0.40079 0.58213-0.87002-0.59431
   1   4  -8  -16.16    6.08  53-0.68941 0.56261-0.39356 0.81257-0.87087-0.01426
   2   3  -9   -5.08    4.32  52-0.68756 0.66108-0.39842 0.66940-0.87031-0.11338
   2   3  -7   19.36    4.15  53-0.69085 0.74561-0.38974 0.70397-0.87129 0.14533
  -7   4  -6   28.58    7.85  52-0.68944-0.60040-0.39348 0.73744-0.87089-0.16598
  -7   4  -3   41.35   11.15  53-0.69380-0.47180-0.38179 0.78653-0.87212 0.22087
  -6   2   1   17.50    6.34  53-0.69283-0.17269-0.38442 0.60409-0.87186 0.73734
  -5   5  -4   31.56   10.86  53-0.68969-0.19252-0.39283 0.94554-0.87096 0.21428
  -3   3 -12    1.81    5.00  52-0.68959-0.24214-0.39308 0.53220-0.87093-0.75230
  -3   4 -11   14.58    6.10  52-0.68918-0.18719-0.39416 0.69584-0.87081-0.59971
  -1   4  -3  709.01    7.21  53-0.69084 0.46069-0.38976 0.87991-0.87130 0.52327
  -1   5  -6   -0.03    7.78  53-0.68966 0.35092-0.39290 0.96194-0.87095 0.16580
   1   4  -9    6.80    7.03  53-0.69215 0.52161-0.38627 0.78110-0.87167-0.13933
   1   4  -7   35.80    6.03  53-0.69285 0.60800-0.38438 0.82283-0.87186 0.11627
  -9   1  -1   99.13    6.50  54-0.69960-0.73464-0.36592 0.35356-0.87364 0.30963
  -8   3  -6    6.14    6.12  53-0.69481-0.76482-0.37930 0.56691-0.87244-0.23753
  -8   3  -2    2.01    9.47  54-0.69887-0.59360-0.36800 0.63637-0.87347 0.27513
  -6   3 -10    5.39    4.90  55-0.70003-0.61715-0.36469 0.50147-0.87374-0.64777
  -6   3   0  111.61    6.92  54-0.69551-0.20147-0.37738 0.71450-0.87263 0.63241
  -5   3 -11   -8.56    4.75  54-0.69864-0.49463-0.36864 0.50036-0.87341-0.72374
  -5   4 -10   23.82    6.54  54-0.69906-0.44812-0.36744 0.65940-0.87351-0.57362
  -5   5  -8   78.51   10.05  54-0.69704-0.35427-0.37313 0.84608-0.87302-0.29362
  -4   5  -9   -8.32    7.78  54-0.69582-0.23345-0.37652 0.84498-0.87271-0.37214
  -2   1   1   30.99    3.15  54-0.69643 0.43900-0.37482 0.50929-0.87287 0.92009
  -2   4  -2  264.77    7.35  54-0.69575 0.35172-0.37670 0.87205-0.87269 0.60298
  -2   5  -4   56.57   10.42  54-0.69849 0.28277-0.36905 0.96624-0.87338 0.37073
  -1   5  -9   42.38    8.04  53-0.69475 0.22528-0.37945 0.89165-0.87243-0.21697
   0   4 -11    4.06    7.21  54-0.69952 0.28997-0.36614 0.70824-0.87362-0.44428
   1   3  -4   14.09    4.63  54-0.69611 0.72377-0.37571 0.73347-0.87278 0.47816
  -9   2  -4    6.75    6.36  55-0.70363-0.84500-0.35412 0.42788-0.87446-0.05408
  -9   2  -3  -15.93    6.98  55-0.70348-0.80091-0.35457 0.45033-0.87443 0.07269
  -7   4  -7   12.09    6.89  55-0.70046-0.63384-0.36335 0.68805-0.87378-0.29188
  -6   4  -9    7.56    6.61  55-0.70350-0.55940-0.35451 0.65345-0.87444-0.49714
  -6   5  -6  102.81   10.00  54-0.70081-0.42264-0.36232 0.86116-0.87386-0.08783
  -6   5  -5   46.56   10.09  54-0.69996-0.38013-0.36476 0.88501-0.87366 0.03750
  -6   5  -4   -8.21   12.34  55-0.70390-0.33454-0.35333 0.89255-0.87452 0.16681
  -5   1   2  103.84    4.49  55-0.70525 0.02250-0.34930 0.46032-0.87478 0.89691
  -5   4  -1   24.28    7.98  54-0.70049-0.06818-0.36324 0.83587-0.87379 0.58097
  -5   5  -3   42.17   12.42  55-0.70414-0.13644-0.35261 0.93104-0.87457 0.34670
  -4   4  -1  232.05    7.93  54-0.70088 0.08640-0.36214 0.84954-0.87387 0.62977
  -3   3   0   88.64    7.24  55-0.70475 0.27499-0.35082 0.73193-0.87469 0.78770
  -3   5 -10   15.02    8.83  55-0.70517-0.11959-0.34956 0.81294-0.87477-0.44753
  -2   5 -10   21.36    8.89  54-0.70171 0.03591-0.35972 0.83507-0.87406-0.39546
  -1   5  -5   56.86    9.09  55-0.70338 0.40218-0.35485 0.94720-0.87441 0.29489
   0   4  -4   15.04    7.10  55-0.70181 0.58567-0.35944 0.84315-0.87408 0.45061
   2   3 -10    8.98    4.47  55-0.70583 0.63682-0.34759 0.59786-0.87489-0.23595
  -9   2  -5  -27.67    5.50  56-0.70890-0.87823-0.33809 0.39351-0.87542-0.18357
  -9   2  -2   17.97    7.03  56-0.70920-0.74943-0.33714 0.44941-0.87547 0.20429
  -8   1   1   24.50    5.86  57-0.71279-0.47985-0.32584 0.37370-0.87598 0.61781
  -8   2  -8    5.72    4.06  56-0.70846-0.84989-0.33945 0.34659-0.87535-0.51401
  -8   2   0   42.77    7.31  56-0.70722-0.51497-0.34324 0.50897-0.87514 0.51139
  -8   3  -7    6.08    5.65  57-0.71069-0.79424-0.33249 0.50205-0.87570-0.36399
  -7   3  -9    1.20    4.50  56-0.70876-0.71896-0.33853 0.47991-0.87540-0.56572
  -7   4  -2  -15.42    9.05  55-0.70636-0.41684-0.34584 0.77001-0.87498 0.35012
  -6   1   2   23.32    4.60  57-0.71263-0.12557-0.32636 0.42333-0.87596 0.84855
  -6   4  -1    5.02   10.06  56-0.70963-0.21713-0.33583 0.79584-0.87554 0.53029
  -6   5  -7   -3.08    8.09  56-0.70670-0.45437-0.34480 0.82501-0.87505-0.21577
  -4   4 -11  -10.65    5.06  56-0.70592-0.32360-0.34716 0.63490-0.87490-0.64891
  -2  -2   2    2.97    1.40  57-0.71272 0.45915-0.32606 0.05638-0.87597 0.98378
  -1   5 -10   58.54    8.54  56-0.70950 0.19832-0.33623 0.82806-0.87552-0.34356
   0   5  -8  -16.05    8.46  55-0.70636 0.43392-0.34584 0.88387-0.87498-0.03569
   1   4 -10    5.39    5.67  56-0.70999 0.49897-0.33471 0.71339-0.87559-0.26527
   1   4  -6   36.06    5.90  56-0.70683 0.66244-0.34442 0.80378-0.87507 0.25034
  -8   3  -1   -7.06    8.95  56-0.71266-0.53168-0.32635 0.61078-0.87596 0.40453
  -7   2   1    9.49    6.43  57-0.71334-0.30972-0.32417 0.52692-0.87605 0.69067
  -7   3   0   12.30    8.72  57-0.71463-0.33914-0.32001 0.64426-0.87619 0.58575
  -7   4  -8    6.43    6.21  58-0.71548-0.66061-0.31720 0.62121-0.87628-0.41739
  -6   5  -3   19.45   12.13  57-0.71303-0.28324-0.32519 0.88397-0.87601 0.29630
  -5   5  -9   -7.32    6.88  57-0.71176-0.37638-0.32922 0.78331-0.87584-0.42001
  -4   5 -10    3.02    7.89  57-0.71336-0.26312-0.32413 0.76866-0.87605-0.49487
  -3   2   1   -2.54    5.17  58-0.71615 0.31516-0.31499 0.57668-0.87635 0.89733
  -3   4  -1   13.56    7.17  56-0.71206 0.25424-0.32828 0.82867-0.87588 0.68283
  -2   4 -12    1.95    5.93  57-0.71458-0.04772-0.32017 0.61242-0.87619-0.67035
   0   5  -9   25.49    8.14  58-0.71594 0.40312-0.31569 0.84286-0.87633-0.16484
   0   5  -7    2.68    6.66  56-0.71124 0.48267-0.33090 0.89590-0.87577 0.09044
   2   3  -6   -6.51    3.78  58-0.71710 0.81750-0.31182 0.64443-0.87643 0.27682
  -8   4  -5  -14.54    8.27  58-0.71869-0.68660-0.30641 0.65950-0.87657-0.08591
  -8   4  -4    1.81    7.33  58-0.71733-0.64628-0.31102 0.68114-0.87647 0.04451
  -6   5  -8    3.05    7.97  59-0.72133-0.49223-0.29730 0.76445-0.87670-0.34906
  -4   1   2  227.88    4.09  58-0.72014 0.19200-0.30145 0.42644-0.87665 0.94974
  -4   6  -7   10.44    9.67  58-0.71771-0.12216-0.30973 0.95944-0.87650-0.09099
  -4   6  -6   18.70   10.01  57-0.71655-0.08114-0.31360 0.98284-0.87640 0.03716
  -3   6  -8    7.39   11.16  58-0.71895-0.00636-0.30554 0.94751-0.87658-0.16697
  -3   6  -7   39.97    9.87  57-0.71563 0.03247-0.31667 0.98100-0.87631-0.03761
  -3   6  -6   42.80   10.54  57-0.71629 0.07445-0.31449 0.99774-0.87638 0.09037
  -1   4 -12   14.33    5.37  58-0.71798 0.11082-0.30881 0.61727-0.87652-0.62077
   0   5  -6  129.37    8.19  58-0.71929 0.53173-0.30436 0.88944-0.87661 0.22001
   1   3 -12    8.93    4.63  59-0.72106 0.41308-0.29822 0.49523-0.87669-0.54234
  -9   1   0    5.41    5.71  58-0.72152-0.66401-0.29670 0.30817-0.87671 0.43790
  -9   2  -1    3.03    7.58  60-0.72588-0.69520-0.28101 0.41554-0.87673 0.33373
  -8   4  -6   -1.35    6.82  59-0.72392-0.72350-0.28818 0.61818-0.87675-0.21103
  -8   4  -3    2.32    7.98  59-0.72170-0.60011-0.29609 0.68637-0.87671 0.17278
  -7   4  -1  -13.13   10.30  59-0.72437-0.35731-0.28654 0.73106-0.87675 0.47993
  -7   5  -6   -5.01    9.55  59-0.72250-0.55357-0.29323 0.77616-0.87673-0.13670
  -7   5  -5   -6.82    8.42  59-0.72109-0.51368-0.29823 0.80585-0.87669-0.00970
  -7   5  -4    4.57   10.98  58-0.72134-0.47003-0.29736 0.81898-0.87670 0.11844
  -5   5  -2   -7.11    9.36  59-0.72071-0.07588-0.29955 0.89674-0.87667 0.47782
  -5   6  -6  -11.08   11.78  59-0.72421-0.23142-0.28710 0.94533-0.87675-0.01471
  -4   5  -2   21.28    9.88  58-0.72041 0.07701-0.30059 0.91074-0.87666 0.52765
  -4   6  -8   18.26   10.53  59-0.72370-0.15899-0.28896 0.91986-0.87675-0.21978
  -4   6  -5   72.19   10.92  58-0.72022-0.03699-0.30124 0.99017-0.87665 0.16807
  -3   4 -12   -0.38    4.74  60-0.72532-0.19477-0.28306 0.56476-0.87674-0.72617
  -3   6  -5    0.09   10.04  59-0.72220 0.12215-0.29432 0.99809-0.87673 0.21654
  -2   5 -11    8.05    7.30  59-0.72382 0.01538-0.28851 0.74471-0.87675-0.52252
  -2   5  -3  311.24    8.75  58-0.72001 0.34595-0.30198 0.91924-0.87664 0.50132
  -2   6  -8   65.04   10.86  59-0.72354 0.15375-0.28955 0.94977-0.87675-0.11585
  -2   6  -7   22.54    9.50  59-0.72114 0.19328-0.29804 0.97682-0.87669 0.01132
  -2   6  -6  -10.69   11.13  59-0.72378 0.23783-0.28865 0.98673-0.87675 0.13966
  -1   3  -1   12.33    6.71  59-0.72345 0.56435-0.28985 0.67870-0.87675 0.76492
  -1   5  -4    7.81    7.19  58-0.72134 0.46230-0.29736 0.90827-0.87670 0.42444
   3   2  -8   -3.93    1.72  63-0.73992 0.90111-0.22357 0.38791-0.87478 0.04751
  -9   3  -4   -6.10    6.36  60-0.72679-0.80461-0.27754 0.49185-0.87669-0.02812
  -9   3  -3  -20.78    7.09  60-0.72829-0.76030-0.27189 0.50766-0.87662 0.09968
  -6   4 -10   13.58    4.58  59-0.72590-0.57563-0.28088 0.55785-0.87672-0.61691
  -6   5  -2   26.74    9.75  60-0.72680-0.22532-0.27753 0.85754-0.87669 0.42664
  -5   4 -11    3.44    4.27  59-0.72601-0.45996-0.28048 0.55015-0.87672-0.69206
  -5   6  -7   26.45    9.47  60-0.72583-0.26965-0.28112 0.91634-0.87672-0.14133
  -5   6  -5   14.65   10.23  60-0.72558-0.18729-0.28205 0.95962-0.87672 0.11419
  -4   6  -4   65.30   13.38  60-0.72819 0.01396-0.27225 0.98133-0.87663 0.29559
  -3   5 -11   -4.05    6.19  60-0.72706-0.13738-0.27656 0.71854-0.87668-0.57378
  -3   5  -2   22.31   10.95  61-0.72962 0.24170-0.26677 0.89556-0.87653 0.57961
  -3   6  -9  -23.25    9.62  60-0.72793-0.03739-0.27326 0.89708-0.87664-0.29499
  -1   5 -11    6.59    7.04  60-0.72837 0.17594-0.27158 0.74061-0.87662-0.47029
   0   3  -2   23.17    4.71  59-0.72589 0.68056-0.28092 0.66377-0.87672 0.68810
   0   5 -10   -5.16    7.15  61-0.73018 0.37740-0.26457 0.77562-0.87649-0.29731
   1   4 -11  -16.24    5.93  61-0.73222 0.48353-0.25649 0.61249-0.87628-0.39017
   1   4  -5   26.64    5.75  60-0.72938 0.72763-0.26768 0.74738-0.87655 0.37699
   3   0  -5   37.81    1.33  61-0.73197 0.99218-0.25748 0.20351-0.87631 0.38831
  -9   3  -5    9.07    5.21  61-0.73127-0.84377-0.26024 0.45452-0.87634-0.15708
  -8   3  -8   -2.53    2.96  61-0.72952-0.81335-0.26712 0.41738-0.87650-0.49118
  -8   3  -8    0.99    1.93  60-0.73015-0.81613-0.26465 0.41327-0.87645-0.49147
  -8   4  -2   43.77    9.39  61-0.73049-0.54749-0.26334 0.67466-0.87642 0.30034
  -7   1   2   -9.18    4.17  61-0.73230-0.26277-0.25612 0.33766-0.87623 0.79722
  -7   5  -7   -3.22    6.33  61-0.73032-0.58725-0.26398 0.73058-0.87644-0.26647
  -7   5  -3   14.13    9.28  60-0.72907-0.42362-0.26886 0.81441-0.87653 0.24605
  -6   5  -9   -4.40    5.94  61-0.73233-0.51123-0.25598 0.69606-0.87622-0.47183
  -5   3   1   77.16    7.08  61-0.73106 0.03034-0.26110 0.63269-0.87637 0.81522
  -5   4   0   12.02    9.00  61-0.73098 0.00312-0.26138 0.75399-0.87637 0.70948
  -5   5 -10    2.53    4.90  60-0.73015-0.40291-0.26464 0.69672-0.87645-0.54642
  -5   6  -8   11.95    9.30  60-0.73113-0.30415-0.26081 0.87166-0.87636-0.26768
  -5   6  -4    3.00   10.56  61-0.73060-0.13939-0.26289 0.95791-0.87641 0.24210
  -4   6  -9   10.15    9.03  61-0.73195-0.19070-0.25752 0.86453-0.87627-0.34574
  -3   6  -4 1011.60   14.63  61-0.73182 0.17321-0.25806 0.98127-0.87628 0.34280
  -2   6  -9   26.01    8.18  60-0.72950 0.11938-0.26721 0.90553-0.87650-0.24204
  -2   6  -5   26.98    9.14  60-0.73056 0.28649-0.26306 0.97870-0.87641 0.26735
  -1   4  -2 1320.39    7.62  60-0.72942 0.54067-0.26753 0.77898-0.87651 0.65760
   0   4 -12   10.63    5.16  61-0.73294 0.28172-0.25353 0.57749-0.87614-0.57051
   0   5  -5   30.14    7.81  61-0.73235 0.58660-0.25592 0.85816-0.87622 0.34805
  -9   3  -2    4.10    7.25  61-0.73423-0.71111-0.24812 0.50131-0.87592 0.22683
  -8   3   0   30.76    7.92  62-0.73656-0.47124-0.23828 0.54664-0.87550 0.53325
  -8   4  -7   -0.01    4.59  62-0.73425-0.75325-0.24803 0.55924-0.87591-0.34063
  -7   4  -9    9.33    3.65  62-0.73470-0.68259-0.24619 0.52994-0.87584-0.54503
  -6   3   1   51.12    6.08  62-0.73418-0.12186-0.24832 0.60590-0.87593 0.76510
  -6   4   0   51.86    7.72  61-0.73449-0.14868-0.24704 0.72641-0.87588 0.65696
  -6   6  -6   86.00    8.82  62-0.73445-0.37583-0.24720 0.88627-0.87588-0.06456
  -6   6  -5  -18.70    9.47  62-0.73445-0.33002-0.24723 0.90825-0.87588 0.06350
  -4   4   0   73.12    8.46  62-0.73526 0.16401-0.24384 0.75052-0.87575 0.76007
  -4   5 -11    6.68    5.21  63-0.73804-0.28318-0.23182 0.66168-0.87517-0.62785
  -2   3   0  109.05    5.68  62-0.73513 0.46311-0.24436 0.63909-0.87577 0.83938
  -2   4  -1   68.38    6.84  62-0.73437 0.43233-0.24755 0.76241-0.87590 0.73489
  -1   6  -8   -1.05    8.19  62-0.73423 0.32096-0.24812 0.92197-0.87592-0.06694
  -1   6  -7    8.92    8.25  61-0.73356 0.36199-0.25092 0.94293-0.87602 0.06186
   0   2  -1  704.53    3.86  62-0.73460 0.71914-0.24658 0.51105-0.87586 0.79036
   0   4  -3  670.72    7.62  62-0.73552 0.66150-0.24272 0.74825-0.87570 0.57820
   2   2  -4  735.27    2.99  64-0.74113 0.91394-0.21778 0.44979-0.87433 0.50675
  -9   3  -6    1.90    4.31  62-0.73904-0.87367-0.22715 0.40045-0.87494-0.28451
  -8   2   1   36.28    5.90  63-0.74032-0.44096-0.22133 0.40836-0.87459 0.63984
  -7   5  -2  -12.07   11.06  63-0.73964-0.37156-0.22445 0.79477-0.87478 0.36969
  -6   6  -7    8.65    7.58  62-0.73811-0.41239-0.23131 0.85080-0.87517-0.19381
  -6   6  -4    3.94    9.92  62-0.73809-0.28718-0.23142 0.91160-0.87517 0.18965
  -5   5  -1   -7.22   10.86  63-0.73934-0.01779-0.22583 0.83984-0.87486 0.60218
  -5   6  -3    1.42   12.81  63-0.73939-0.08819-0.22557 0.93948-0.87484 0.36820
  -4   3   1   30.15    5.60  63-0.73816 0.19706-0.23112 0.61881-0.87516 0.86485
  -3   6 -10   16.01    8.24  63-0.73975-0.06969-0.22396 0.82843-0.87475-0.42236
  -2   6 -10   77.65    8.74  63-0.73989 0.08610-0.22332 0.84136-0.87471-0.37123
  -1   2   0 2251.16    5.44  62-0.73702 0.60784-0.23611 0.50637-0.87542 0.86739
  -1   6  -9   66.99    8.10  62-0.73807 0.28116-0.23152 0.88414-0.87518-0.19303
  -1   6  -6   53.26    8.36  62-0.73802 0.40708-0.23171 0.94461-0.87519 0.19044
  -9   2   0  242.74    6.91  65-0.74514-0.63728-0.19809 0.34411-0.87290 0.45708
  -8   4  -1   23.11    9.15  64-0.74308-0.49417-0.20834 0.63786-0.87372 0.42544
  -8   5  -5    4.90    7.70  65-0.74468-0.65131-0.20043 0.69403-0.87310-0.06609
  -8   5  -4   -9.49    8.92  65-0.74513-0.61025-0.19817 0.71352-0.87291 0.06221
  -7   3   1  -25.29    7.32  64-0.74362-0.26667-0.20569 0.55048-0.87352 0.70867
  -7   4   0   -9.94    9.05  63-0.74171-0.29224-0.21489 0.67251-0.87420 0.60146
  -7   5  -8   -2.35    4.64  64-0.74138-0.61543-0.21645 0.66476-0.87430-0.40078
  -6   5  -1  -25.03   10.95  64-0.74331-0.16848-0.20719 0.80975-0.87364 0.54998
  -5   6  -9   -3.18    7.21  64-0.74313-0.33278-0.20807 0.80603-0.87370-0.40332
  -4   5  -1  -15.39    8.75  64-0.74178 0.14232-0.21459 0.84326-0.87417 0.65212
  -2   5  -2  884.37   10.78  64-0.74297 0.41052-0.20887 0.84650-0.87376 0.62556
  -2   6  -4  264.84    9.58  64-0.74189 0.33963-0.21406 0.95086-0.87414 0.39492
  -1   5  -3   79.35    7.23  64-0.74235 0.52517-0.21184 0.84233-0.87398 0.55117
   0   5 -11   13.27    5.98  64-0.74355 0.34617-0.20604 0.69318-0.87355-0.42251
   1  -1  -1  773.42    2.20  64-0.74300 0.84703-0.20872 0.06407-0.87375 0.77311
   1   5  -9    7.92    7.08  64-0.74498 0.58881-0.19893 0.73871-0.87297-0.11749
   1   5  -8  -16.68    6.34  64-0.74310 0.63295-0.20822 0.76720-0.87371 0.01360
  -9   3  -1   -4.41    7.14  66-0.74839-0.66377-0.18147 0.45858-0.87134 0.35115
  -8   5  -6    3.58    6.25  65-0.74743-0.68729-0.18663 0.65769-0.87184-0.19392
  -8   5  -3    8.32    9.25  66-0.74774-0.56309-0.18500 0.71742-0.87168 0.18993
  -6   2   2   54.46    5.04  65-0.74574-0.08321-0.19550 0.43044-0.87265 0.86598
  -6   6  -8    4.51    5.83  65-0.74578-0.44819-0.19527 0.79591-0.87263-0.32513
  -6   6  -3   23.34   10.63  64-0.74508-0.23907-0.19887 0.89957-0.87294 0.31534
  -5   2   2  125.87    5.05  65-0.74564 0.07347-0.19599 0.44786-0.87269 0.91704
  -4   6 -10    5.59    5.71  65-0.74532-0.22018-0.19763 0.78614-0.87284-0.47832
  -2   5 -12   -9.69    5.24  66-0.74840 0.00337-0.18139 0.61613-0.87133-0.65583
  -1   6 -10   -2.68    8.11  65-0.74703 0.24930-0.18877 0.82028-0.87204-0.32607
  -1   6  -5   12.66    9.83  64-0.74559 0.45689-0.19625 0.92581-0.87272 0.31441
   1   3  -3   50.24    4.56  65-0.74635 0.81548-0.19236 0.57099-0.87237 0.60574
   1   5  -7    2.76    6.65  65-0.74686 0.67569-0.18967 0.77185-0.87213 0.13733
   2   3  -5   67.22    3.66  66-0.74935 0.89111-0.17615 0.52994-0.87079 0.40058
   2   4  -9   40.81    4.33  65-0.74809 0.73216-0.18308 0.59830-0.87150-0.08846
   2   4  -8    7.31    4.48  66-0.74855 0.77893-0.18060 0.61532-0.87125 0.03675
  -9   4  -5   -4.00    5.12  66-0.75003-0.80968-0.17202 0.50774-0.87039-0.14050
  -9   4  -4    0.11    5.06  66-0.74824-0.77127-0.18206 0.53810-0.87143-0.00900
  -9   4  -3   -3.32    6.94  66-0.74978-0.72773-0.17346 0.55052-0.87055 0.11541
  -7   6  -6   13.34    8.30  66-0.74951-0.51746-0.17499 0.80215-0.87071-0.12274
  -7   6  -5   69.11    8.42  65-0.74792-0.47681-0.18378 0.82956-0.87160 0.01162
  -7   6  -4    8.00   10.32  66-0.74959-0.43279-0.17455 0.84114-0.87066 0.13369
  -6   5 -10    4.68    3.95  67-0.75118-0.54147-0.16535 0.58591-0.86964-0.60858
  -4   7  -7   -8.54    9.00  66-0.74862-0.07733-0.17998 0.96883-0.87123-0.07225
  -4   7  -6    4.92    9.96  65-0.74834-0.03594-0.18148 0.98975-0.87138 0.05417
  -3   4   0    0.82    6.72  66-0.74793 0.33565-0.18374 0.70703-0.87160 0.80741
  -3   5  -1   89.63   10.39  66-0.75038 0.30505-0.17005 0.81379-0.87017 0.69931
  -3   7  -7  -17.36    9.52  66-0.74866 0.07832-0.17974 0.98290-0.87120-0.02185
  -3   7  -6   27.57   12.24  66-0.75028 0.12365-0.17062 0.99733-0.87024 0.10505
   0   5  -4   71.66    8.02  66-0.74997 0.64690-0.17238 0.79867-0.87043 0.46890
   0   6  -8   25.21    8.68  66-0.75006 0.49227-0.17187 0.85755-0.87037-0.01911
  -8   5  -2   17.11    9.30  67-0.75352-0.51288-0.15066 0.70236-0.86787 0.31428
  -7   2   2    7.17    5.66  68-0.75409-0.22805-0.14699 0.36898-0.86739 0.80972
  -7   5  -1   17.10    8.71  66-0.75116-0.31830-0.16514 0.75105-0.86962 0.49486
  -5   6  -2   27.83    9.66  66-0.75084-0.03508-0.16703 0.90274-0.86984 0.49125
  -5   7  -7   -5.27    9.48  67-0.75291-0.22945-0.15452 0.93030-0.86835-0.12794
  -5   7  -6    8.74    9.07  67-0.75151-0.18884-0.16306 0.95834-0.86938 0.00104
  -5   7  -5   10.77   11.74  68-0.75349-0.14635-0.15086 0.97021-0.86789 0.12713
  -4   7  -8    6.01    9.47  66-0.75189-0.11651-0.16077 0.93035-0.86911-0.20421
  -4   7  -5   54.08   10.52  66-0.75124 0.00914-0.16468 0.99505-0.86957 0.18152
  -3   7  -8    8.87    8.61  66-0.75102 0.03861-0.16598 0.95092-0.86972-0.15264
  -2   6 -11  -20.42    6.67  68-0.75398 0.06575-0.14770 0.74460-0.86748-0.50929
  -2   7  -7   35.65   11.18  67-0.75269 0.23754-0.15588 0.97168-0.86852 0.02717
  -1  -2   1  842.07    2.52  67-0.75126 0.61330-0.16454-0.11034-0.86956 0.90231
  -1   5 -12   -7.72    4.84  67-0.75244 0.16514-0.15744 0.60760-0.86871-0.60691
   0   6  -9  181.05    8.41  67-0.75273 0.45187-0.15564 0.82343-0.86849-0.14867
   0   6  -7   36.70    8.97  66-0.75140 0.53639-0.16373 0.86964-0.86946 0.10883
   1   4  -4   22.58    5.59  67-0.75277 0.79315-0.15537 0.65419-0.86846 0.49608
   1   5 -10    8.14    5.58  67-0.75214 0.55367-0.15924 0.67813-0.86893-0.24865
   1   5  -6   23.00    6.49  67-0.75356 0.72281-0.15038 0.75149-0.86783 0.26378
   2   4  -7   69.33    4.10  67-0.75241 0.82098-0.15762 0.61307-0.86874 0.16369
  -9   4  -2  -14.74    7.13  68-0.75503-0.68311-0.14084 0.54131-0.86662 0.23382
  -8   5  -7   -4.67    4.22  68-0.75416-0.71794-0.14656 0.60009-0.86739-0.33063
  -7   6  -7   -7.49    5.63  68-0.75370-0.54955-0.14955 0.75916-0.86778-0.25650
  -7   6  -3  -10.40    8.96  68-0.75386-0.38353-0.14855 0.83803-0.86765 0.25653
  -6   6  -9    9.09    5.01  68-0.75533-0.48041-0.13880 0.71964-0.86634-0.45825
  -6   6  -2  -16.63    9.79  68-0.75386-0.18572-0.14855 0.87180-0.86765 0.43687
  -5   6 -10   -4.79    4.94  68-0.75518-0.35871-0.13983 0.71652-0.86648-0.53896
  -4   2   2   -1.40    4.72  68-0.75529 0.23832-0.13909 0.40499-0.86638 0.96176
  -3   1   2   23.11    2.95  68-0.75568 0.38527-0.13639 0.27571-0.86600 0.99073
  -3   3   1   -9.64    5.37  68-0.75382 0.36536-0.14878 0.54994-0.86768 0.90922
  -3   6 -11   -4.13    5.42  68-0.75507-0.08726-0.14055 0.72522-0.86658-0.56342
  -3   7  -9    3.09    8.76  68-0.75585 0.00154-0.13523 0.90052-0.86584-0.28475
  -3   7  -5   -4.19   10.48  67-0.75355 0.16700-0.15052 0.99570-0.86790 0.22942
  -2   2   1  212.79    4.33  67-0.75356 0.50923-0.15046 0.42670-0.86790 0.93747
  -2   6  -3  611.16   10.32  68-0.75420 0.39276-0.14631 0.90419-0.86736 0.51334
  -2   7  -8    6.43    8.49  67-0.75400 0.19776-0.14765 0.94560-0.86753-0.10340
  -2   7  -6  264.53   12.26  68-0.75526 0.28158-0.13925 0.97911-0.86640 0.15189
   1   2  -2  274.32    3.24  68-0.75556 0.85487-0.13722 0.39662-0.86612 0.70333
   2   4 -10    7.97    4.07  69-0.75711 0.70083-0.12622 0.52058-0.86453-0.22437
  -8   3   1   -4.87    6.67  69-0.75773-0.41103-0.12177 0.45379-0.86385 0.64554
  -8   4   0   12.71    8.39  69-0.75757-0.44051-0.12294 0.57415-0.86403 0.54434
  -6   4   1  326.55    8.82  69-0.75745-0.08683-0.12384 0.62132-0.86417 0.77275
  -6   5   0    2.92   10.16  68-0.75651-0.11014-0.13064 0.74197-0.86518 0.66461
  -6   7  -6   29.70    9.52  69-0.75789-0.33797-0.12051 0.90365-0.86366-0.05555
  -6   7  -5  -22.88   10.46  69-0.75775-0.29164-0.12162 0.92447-0.86383 0.07074
  -5   4   1   84.95    8.15  69-0.75720 0.06925-0.12565 0.63696-0.86444 0.82470
  -5   5   0   22.68    9.90  69-0.75711 0.04246-0.12631 0.75928-0.86454 0.71887
  -5   7  -8   -6.70    6.66  69-0.75673-0.26024-0.12912 0.88634-0.86496-0.26039
  -5   7  -4   27.29   10.15  69-0.75656-0.10014-0.13029 0.96666-0.86513 0.25243
  -4   7  -9   -1.24    7.95  69-0.75766-0.14499-0.12227 0.87356-0.86393-0.33803
  -4   7  -4   73.24   11.00  68-0.75611 0.05954-0.13352 0.98390-0.86560 0.30893
  -2   7  -9    7.29    8.74  69-0.75783 0.15784-0.12102 0.90111-0.86374-0.23517
  -1   6 -11    4.71    6.40  70-0.75869 0.21965-0.11436 0.72761-0.86269-0.46397
  -1   6  -4   40.81    8.03  68-0.75625 0.51057-0.13248 0.88553-0.86545 0.43638
   0   6 -10    2.35    7.48  69-0.75879 0.41755-0.11354 0.76021-0.86256-0.28427
   0   6  -6    0.87    7.04  68-0.75623 0.58291-0.13266 0.85986-0.86547 0.23022
  -9   3   0  -14.65    6.32  70-0.75956-0.60844-0.10586 0.40470-0.86131 0.46319
  -7   6  -8   -4.16    4.66  69-0.75859-0.58436-0.11368 0.69491-0.86260-0.38172
  -7   6  -2   14.49   10.78  70-0.75941-0.33786-0.10711 0.81262-0.86152 0.38039
  -6   7  -7   10.09    7.63  70-0.75956-0.37868-0.10586 0.86721-0.86131-0.18649
  -6   7  -4  -33.63   11.56  70-0.75973-0.24816-0.10444 0.92729-0.86107 0.19605
  -4   6 -11    2.48    4.54  70-0.75996-0.24806-0.10245 0.67310-0.86073-0.62078
  -3   7  -4   -0.28   10.24  70-0.75869 0.21781-0.11295 0.97691-0.86248 0.35297
  -2   7  -5  115.72    9.61  70-0.75892 0.32847-0.11110 0.96916-0.86218 0.27846
  -1  -1   1  449.17    1.31  70-0.75989 0.63481-0.10309-0.03078-0.86084 0.91506
  -1   4  -1 1474.76    7.64  70-0.75909 0.61298-0.10967 0.64149-0.86194 0.76974
  -9   4  -1   -2.02    7.07  71-0.76142-0.63270-0.09007 0.50572-0.85855 0.35930
  -8   5  -1   21.24    8.82  72-0.76192-0.46820-0.08533 0.66093-0.85768 0.43275
  -8   6  -5   -8.38    6.75  71-0.76150-0.61674-0.08932 0.72598-0.85841-0.06200
  -8   6  -4   18.72    7.81  70-0.76103-0.57504-0.09372 0.74423-0.85921 0.07153
  -7   4   1   14.28    8.41  71-0.76121-0.23532-0.09204 0.57429-0.85891 0.71595
  -5   6  -1    0.45   11.62  71-0.76133 0.01732-0.09093 0.84714-0.85871 0.60770
  -5   7  -3    8.47   12.37  71-0.76153-0.05384-0.08906 0.94695-0.85836 0.37389
  -4   4   1   26.22    8.19  71-0.76173 0.23134-0.08720 0.61556-0.85802 0.87086
  -4   5   0   -4.53    7.82  71-0.76048 0.20264-0.09864 0.74916-0.86007 0.76678
  -4   7  -3   85.02   13.79  71-0.76177 0.10462-0.08675 0.95700-0.85794 0.42617
  -2   5  -1   99.68    9.51  71-0.76165 0.47287-0.08795 0.74560-0.85816 0.73908
  -1   5  -2  241.52    7.57  70-0.76039 0.58527-0.09935 0.75131-0.86020 0.66294
  -1   7  -8  141.18    8.27  70-0.76077 0.35951-0.09602 0.91053-0.85962-0.05783
  -1   7  -7  196.41    9.00  70-0.76080 0.40179-0.09573 0.92922-0.85956 0.06860
   0   4  -2   13.17    6.86  71-0.76160 0.73000-0.08841 0.61166-0.85825 0.69224
   1   5 -11   18.94    5.13  71-0.76268 0.52140-0.07770 0.57606-0.85623-0.38785
   2   4  -6   41.08    4.60  71-0.76210 0.87397-0.08360 0.55907-0.85735 0.28076
  -9   5  -5    1.42    4.69  72-0.76360-0.78439-0.06805 0.54362-0.85433-0.13475
  -9   5  -4    2.22    5.57  72-0.76268-0.74462-0.07792 0.57476-0.85627-0.00501
  -9   5  -3   -1.74    6.37  72-0.76317-0.69927-0.07279 0.58772-0.85527 0.12237
  -8   6  -6   -5.64    5.27  71-0.76251-0.65514-0.07970 0.68862-0.85661-0.18540
  -8   6  -3   11.67    9.03  72-0.76325-0.53347-0.07195 0.74291-0.85510 0.19544
  -7   5   0    0.01    8.26  72-0.76251-0.26548-0.07970 0.68643-0.85661 0.61030
  -6   3   2   12.16    6.21  71-0.76257-0.04804-0.07902 0.45677-0.85648 0.87163
  -6   6  -1    5.91    9.76  71-0.76239-0.13765-0.08093 0.82211-0.85685 0.55514
  -6   7  -8   -4.05    5.89  73-0.76407-0.41935-0.06263 0.80886-0.85322-0.32505
  -6   7  -3  -11.81   11.55  72-0.76340-0.20721-0.07032 0.91230-0.85478 0.31916
  -5   3   2   -9.68    6.01  72-0.76360 0.10634-0.06803 0.45997-0.85432 0.92138
  -5   7  -9    3.30    5.11  71-0.76225-0.30367-0.08224 0.81827-0.85709-0.39491
  -4   6  -1   -9.37    9.90  72-0.76277 0.17788-0.07699 0.84490-0.85609 0.65575
  -3   7 -10    2.42    5.46  71-0.76226-0.03370-0.08215 0.82727-0.85708-0.42101
  -2   4   0   -2.19    6.52  72-0.76251 0.50268-0.07970 0.61671-0.85661 0.84349
  -2   7 -10   -7.10    7.29  72-0.76326 0.13210-0.07181 0.83062-0.85508-0.37121
  -1   7  -9    6.41    8.15  72-0.76295 0.32100-0.07516 0.86896-0.85574-0.19214
  -1   7  -6   27.61   10.69  72-0.76320 0.44814-0.07250 0.92867-0.85521 0.19376
   0  -1   0   55.67    1.20  72-0.76324 0.75255-0.07205-0.06678-0.85513 0.83226
   0   6  -5    8.64    7.30  71-0.76222 0.62920-0.08258 0.83017-0.85716 0.35321
   1   5  -5  121.66    5.33  72-0.76249 0.77369-0.07984 0.70035-0.85664 0.37831
  -8   2   2   15.82    4.47  74-0.76597-0.37416-0.03733 0.24520-0.84778 0.74053
  -7   7  -6    6.76    7.01  73-0.76448-0.48571-0.05777 0.82259-0.85226-0.11740
  -7   7  -5   18.99    6.95  72-0.76409-0.44493-0.06257 0.84960-0.85326 0.01050
  -7   7  -4   11.13    9.56  74-0.76532-0.40572-0.04683 0.85791-0.84991 0.13483
  -6   0   3    8.29    1.64  77-0.76810-0.04336 0.00870-0.03530-0.83636 0.91677
  -4   7 -10    2.52    5.27  73-0.76502-0.18959-0.05097 0.78624-0.85081-0.48332
  -3   7  -3   44.68   13.57  73-0.76456 0.26484-0.05686 0.94101-0.85207 0.47227
  -2   6  -2   28.05   11.58  73-0.76448 0.44429-0.05788 0.83604-0.85228 0.62700
  -2   7  -4    1.66    9.64  72-0.76404 0.37547-0.06318 0.94253-0.85339 0.39408
  -1   3   0  516.99    6.96  73-0.76467 0.64814-0.05541 0.46569-0.85176 0.86616
  -1   6  -3 1127.40   11.07  73-0.76487 0.56099-0.05285 0.82599-0.85122 0.54809
   0   5  -3   53.07    6.52  72-0.76376 0.70376-0.06638 0.71232-0.85404 0.58083
  -9   5  -2   10.10    6.91  75-0.76637-0.66055-0.03204 0.57017-0.84645 0.24096
  -8   6  -2   17.84    9.04  74-0.76628-0.48845-0.03349 0.72604-0.84679 0.31485
  -7   3   2  -11.62    5.96  74-0.76597-0.20659-0.03851 0.40556-0.84794 0.81094
  -7   6  -1   15.54    8.80  73-0.76548-0.29001-0.04565 0.77141-0.84954 0.49624
  -5   7  -2   65.34   12.57  74-0.76614-0.00744-0.03580 0.91081-0.84732 0.49047
  -4   8  -7    2.16    9.70  75-0.76657-0.04955-0.02863 0.96948-0.84565-0.08103
  -4   8  -6   -1.99   10.75  73-0.76547-0.00501-0.04573 0.99249-0.84955 0.05478
  -3   5   0  -15.00    7.76  74-0.76559 0.36335-0.04402 0.70587-0.84917 0.80559
  -3   8  -7   22.48   10.56  74-0.76610 0.10895-0.03648 0.98040-0.84747-0.02444
  -1   7 -10    3.74    6.76  74-0.76649 0.28262-0.02997 0.80355-0.84596-0.33015
  -1   7  -5  -15.64   10.68  74-0.76605 0.49588-0.03727 0.90929-0.84766 0.31338
   0   3  -1 5996.95    8.64  74-0.76548 0.76300-0.04558 0.45130-0.84952 0.78618
   0   6 -11   14.77    5.54  73-0.76579 0.38148-0.04116 0.66647-0.84853-0.42454
   1   6  -8    1.21    6.67  75-0.76645 0.66616-0.03066 0.73302-0.84613 0.00569
   2   0  -3  542.86    1.69  75-0.76731 0.95633-0.01431-0.01298-0.84219 0.55693
  -8   4   1   35.29    7.38  76-0.76740-0.38868-0.01232 0.48228-0.84164 0.65075
  -8   5   0   20.52    8.65  75-0.76726-0.41590-0.01534 0.60595-0.84240 0.54430
  -8   6  -7    4.31    3.77  74-0.76649-0.69731-0.02987 0.62175-0.84590-0.32626
  -7   7  -7   -2.88    4.69  75-0.76662-0.52169-0.02761 0.77688-0.84537-0.25656
  -7   7  -3  -18.08    8.21  75-0.76666-0.35607-0.02695 0.85602-0.84521 0.25558
  -6   7  -2   18.46   11.62  75-0.76697-0.16271-0.02130 0.88237-0.84385 0.43719
  -5   0   3    2.12    1.43  79-0.76862 0.11317 0.04654-0.05899-0.82542 0.95624
  -5   8  -7    5.55    8.30  76-0.76734-0.20407-0.01362 0.93514-0.84197-0.13394
  -5   8  -6    9.54    8.33  74-0.76660-0.16077-0.02806 0.96491-0.84547-0.00104
  -5   8  -5  -10.28   10.38  75-0.76702-0.11310-0.02018 0.97823-0.84358 0.12428
  -4   7  -2   -9.43   13.10  75-0.76688 0.14994-0.02297 0.91390-0.84426 0.53877
  -4   8  -8   -7.32    8.33  74-0.76656-0.08663-0.02871 0.93335-0.84563-0.20282
  -4   8  -5  141.92   10.24  74-0.76663 0.03529-0.02748 0.99741-0.84533 0.17953
  -3   8  -8    6.27    9.37  76-0.76743 0.06650-0.01160 0.94571-0.84147-0.16225
  -3   8  -6  -20.94    9.90  75-0.76654 0.15727-0.02917 0.99467-0.84573 0.10210
   1   6  -9   22.42    6.05  75-0.76701 0.62172-0.02038 0.70456-0.84363-0.12308
   1   6  -7    5.41    7.08  75-0.76710 0.70797-0.01855 0.73982-0.84318 0.13099
  -9   4   0    5.61    6.58  75-0.76730-0.58349-0.01148 0.44795-0.84161 0.46922
  -6   5   1   52.59    9.32  76-0.76771-0.06311-0.00124 0.64128-0.83900 0.77091
  -6   7  -9    2.67    4.05  76-0.76763-0.45658-0.00318 0.72643-0.83950-0.46626
  -5   5   1   18.15    9.36  76-0.76779 0.09637 0.00112 0.65403-0.83839 0.82115
  -5   7 -10    4.87    4.23  76-0.76746-0.33942-0.00767 0.72230-0.84065-0.53839
  -4   3   2   39.16    5.12  75-0.76724 0.26675-0.01277 0.41881-0.84193 0.96025
  -3  -2   2  164.80    1.59  77-0.76797 0.35930 0.00708-0.29164-0.83681 0.89507
  -3   2   2  287.98    4.93  76-0.76746 0.40929-0.00764 0.28823-0.84064 0.98709
  -3   4   1   47.69    6.36  75-0.76728 0.39686-0.01187 0.55416-0.84171 0.90414
  -3   8  -5  544.54   11.25  76-0.76740 0.19221-0.00913 0.99405-0.84102 0.22480
  -2   3   1   -7.32    6.55  75-0.76730 0.53597-0.01148 0.42330-0.84161 0.93104
  -2   8  -7   -3.45   10.24  76-0.76768 0.26635-0.00206 0.96306-0.83921 0.01786
   0   6  -4   26.72    7.13  76-0.76733 0.67743-0.01077 0.77716-0.84143 0.46295
   0   7  -8  246.41    9.01  76-0.76746 0.52167-0.00771 0.83539-0.84066-0.02885
   0   7  -7    9.17    9.16  76-0.76774 0.56518-0.00031 0.84887-0.83876 0.09889
   1   4  -3  268.70    6.08  76-0.76758 0.85002-0.00456 0.52504-0.83986 0.59346
   2   5  -8   23.44    5.17  77-0.76812 0.80872 0.01249 0.56458-0.83536 0.02577
  -9   5  -1   -6.92    6.87  77-0.76822-0.61313 0.01623 0.54064-0.83428 0.35714
  -7   7  -2   17.17   10.60  77-0.76825-0.31542 0.01778 0.83036-0.83386 0.37581
  -6   6   0   64.85    9.17  77-0.76795-0.08964 0.00582 0.75451-0.83709 0.66383
  -6   8  -6  -18.46    7.39  78-0.76835-0.32092 0.02279 0.90957-0.83246-0.06826
  -6   8  -5   -4.53    9.27  78-0.76835-0.27765 0.02279 0.93058-0.83246 0.06230
  -5   6   0  -18.20    8.92  77-0.76792 0.06759 0.00465 0.77246-0.83740 0.71428
  -5   8  -8   -1.93    6.55  76-0.76795-0.24226 0.00568 0.88939-0.83713-0.26414
  -5   8  -4   34.66    9.55  77-0.76793-0.07642 0.00503 0.97350-0.83730 0.24665
  -4   8  -4  -24.58   10.02  77-0.76793 0.08462 0.00508 0.98783-0.83729 0.29793
  -3   7 -11    0.80    4.62  76-0.76791-0.06974 0.00436 0.71969-0.83748-0.56791
  -3   8  -9   18.73    7.16  78-0.76828 0.02504 0.01904 0.89254-0.83351-0.29742
  -2   7 -11   -2.97    4.98  77-0.76805 0.08606 0.00910 0.73039-0.83622-0.51923
  -2   7  -3  125.74   10.25  76-0.76780 0.42243 0.00107 0.89779-0.83834 0.50797
  -2   8  -8   14.19    7.61  77-0.76794 0.22458 0.00550 0.93605-0.83718-0.11258
  -2   8  -6   19.80    9.30  77-0.76801 0.30830 0.00767 0.97194-0.83660 0.14319
  -1   7  -4  -16.00   10.78  76-0.76795 0.53213 0.00568 0.87720-0.83713 0.42699
   0   7  -9   21.94    7.44  76-0.76795 0.47966 0.00568 0.80105-0.83713-0.15693
   1   5  -4   72.73    6.60  77-0.76830 0.82114 0.02022 0.62252-0.83318 0.48269
   1   6 -10  117.87    5.83  77-0.76837 0.57984 0.02426 0.64052-0.83205-0.26181
   1   6  -6    3.64    7.10  77-0.76831 0.75109 0.02072 0.72077-0.83304 0.24870
   2   3  -4   -1.20    3.35  78-0.76834 0.95222 0.02235 0.35008-0.83259 0.48909
   2   4  -5   60.33    4.69  78-0.76845 0.92382 0.03038 0.46447-0.83031 0.38222
   2   5  -9   -6.45    4.45  78-0.76845 0.76924 0.03036 0.52496-0.83032-0.10924
  -9   6  -4   -5.75    4.86  78-0.76829-0.72242 0.03302 0.60579-0.82976-0.01193
  -8   3   2    4.68    5.83  79-0.76832-0.35996 0.05016 0.29914-0.82468 0.74011
  -8   6  -1  -17.07    7.58  78-0.76816-0.44300 0.02244 0.69396-0.83277 0.42490
  -8   7  -5    4.89    5.67  79-0.76833-0.60368 0.03999 0.73759-0.82772-0.06826
  -8   7  -4   19.34    6.85  78-0.76824-0.55454 0.02784 0.76329-0.83124 0.06536
  -7   5   1   36.37    9.16  78-0.76820-0.21614 0.02513 0.60007-0.83201 0.71212
  -7   6   0   -1.01   10.28  78-0.76829-0.24277 0.03291 0.71312-0.82979 0.60268
  -6   4   2  368.46    7.88  78-0.76829-0.03464 0.03300 0.48575-0.82976 0.86578
  -6   8  -7   -2.32    6.14  79-0.76833-0.36217 0.03999 0.87064-0.82772-0.20151
  -6   8  -4    7.97    9.83  78-0.76826-0.23261 0.02994 0.93494-0.83064 0.18837
  -4   6   0   -2.67   10.97  78-0.76828 0.22479 0.03106 0.75939-0.83032 0.75893
  -4   8  -9    5.12    5.06  77-0.76814-0.12855 0.02101 0.87095-0.83317-0.34617
  -3   8  -4  730.60   13.66  78-0.76825 0.23518 0.02887 0.97735-0.83095 0.34199
  -2   8  -9    2.10    7.87  77-0.76822 0.18331 0.02668 0.89066-0.83157-0.24409
   0   7  -6  -17.10    9.36  78-0.76822 0.60650 0.02640 0.84317-0.83165 0.21972
   2   5  -7   12.56    5.17  78-0.76831 0.84999 0.03533 0.56198-0.82909 0.14862
  -9   6  -3   -2.96    5.61  79-0.76820-0.68428 0.04771 0.61161-0.82558 0.11340
  -8   7  -6   -0.82    4.45  79-0.76819-0.63797 0.04991 0.70259-0.82492-0.19686
  -8   7  -3    1.01    7.52  79-0.76819-0.51487 0.05048 0.76281-0.82475 0.18621
  -7   1   3   -6.57    2.53  81-0.76758-0.18725 0.08280 0.01820-0.81446 0.86240
  -6   7  -1  -11.71   11.67  79-0.76821-0.11718 0.04717 0.83735-0.82575 0.54708
  -5   4   2   32.17    7.52  79-0.76821 0.12514 0.04320 0.48892-0.82694 0.91479
  -5   7  -1  140.33   10.62  78-0.76820 0.03908 0.03807 0.85821-0.82845 0.60014
  -5   8  -3   29.70    9.70  78-0.76821-0.03293 0.04091 0.95493-0.82762 0.36402
  -4   5   1   20.79    7.46  78-0.76819 0.25441 0.03636 0.63101-0.82895 0.86285
  -4   8  -3  259.00   13.10  79-0.76820 0.12149 0.04948 0.96258-0.82505 0.41210
  -2   6  -1   94.31   11.34  79-0.76819 0.49139 0.04986 0.74873-0.82493 0.72705
  -2   8  -5  352.49   10.40  78-0.76820 0.35127 0.03693 0.96414-0.82878 0.26385
  -1   5  -1  368.77    7.63  78-0.76820 0.63508 0.03724 0.63499-0.82870 0.75994
  -1   6  -2  320.85   10.41  79-0.76820 0.60688 0.04796 0.74581-0.82551 0.65095
  -1   7 -11   -1.58    5.36  80-0.76797 0.24258 0.06792 0.69204-0.81931-0.49053
   0   7 -10  -14.38    6.56  79-0.76813 0.44055 0.05711 0.73148-0.82271-0.30180
   1   3  -2  101.26    4.66  79-0.76821 0.87969 0.04576 0.35279-0.82617 0.68729
  -7   4   2  -17.19    7.07  80-0.76799-0.18570 0.06398 0.44014-0.82053 0.81058
  -6   2   3  117.29    4.26  81-0.76756-0.02080 0.08164 0.17153-0.81481 0.93704
  -6   8  -3  -10.51    8.64  80-0.76806-0.18763 0.05866 0.92299-0.82219 0.31071
  -5   8  -9   -6.90    4.69  80-0.76797-0.28668 0.06462 0.81477-0.82032-0.41010
  -4   7  -1   30.43   10.37  79-0.76809 0.19564 0.05677 0.85338-0.82278 0.64562
  -2   5   0   34.05    7.65  79-0.76811 0.52168 0.05399 0.62333-0.82364 0.83174
  -1   1   1  802.41    3.05  80-0.76797 0.66724 0.06512 0.08406-0.82016 0.91849
  -1   8  -8    0.96    8.63  80-0.76804 0.38132 0.06041 0.89473-0.82165-0.07601
  -1   8  -7  -10.23    8.14  80-0.76807 0.42287 0.05830 0.91666-0.82231 0.05247
   0   5  -2   81.71    7.95  80-0.76801 0.74942 0.06266 0.60380-0.82094 0.67611
  -9   6  -2    7.38    5.81  81-0.76764-0.64260 0.07665 0.60081-0.81655 0.23282
  -8   5   1  -10.20    7.92  81-0.76738-0.37048 0.08523 0.52436-0.81371 0.64265
  -8   7  -2    4.56    8.16  81-0.76733-0.47291 0.08660 0.74667-0.81325 0.30344
  -7   7  -1  -11.54   10.15  81-0.76760-0.27589 0.07822 0.78968-0.81603 0.48452
  -7   8  -6   -0.77    5.33  81-0.76748-0.47330 0.08233 0.82815-0.81468-0.13485
  -7   8  -5    8.62    5.62  81-0.76770-0.43200 0.07436 0.85777-0.81729-0.00425
  -7   8  -4  -34.15    7.85  81-0.76750-0.38842 0.08162 0.87039-0.81491 0.12245
  -6   8  -8   -8.76    4.14  81-0.76777-0.40085 0.07169 0.81328-0.81816-0.33430
  -3   8 -10    2.27    4.45  81-0.76769-0.01515 0.07474 0.81367-0.81717-0.43945
  -3   8  -3    0.76   12.83  81-0.76749 0.27803 0.08202 0.94548-0.81478 0.45416
  -2   8 -10   -7.25    5.57  80-0.76770 0.14173 0.07436 0.82064-0.81729-0.38285
  -2   8  -4   -4.86   12.25  81-0.76749 0.39389 0.08195 0.94036-0.81480 0.37796
  -1   4   0  506.14    6.77  81-0.76763 0.66277 0.07694 0.47461-0.81645 0.85294
  -1   8  -9  -19.57    7.52  81-0.76743 0.34074 0.08367 0.85074-0.81423-0.21065
  -1   8  -6  287.93    9.44  80-0.76768 0.46502 0.07504 0.91951-0.81707 0.17552
   0   1   0   63.72    1.70  80-0.76774 0.78177 0.07290 0.07099-0.81777 0.83975
   0   6  -3  101.12    8.90  81-0.76748 0.71992 0.08208 0.70527-0.81476 0.56466
   0   7  -5   -8.25    7.69  81-0.76772 0.65017 0.07376 0.81620-0.81749 0.33151
   1   6  -5    1.24    7.42  81-0.76739 0.79370 0.08507 0.67859-0.81376 0.35791
   2   5 -10   13.94    3.84  82-0.76697 0.72559 0.09593 0.44040-0.81008-0.25543
  -9   4   1    2.73    6.27  83-0.76580-0.55008 0.11777 0.33879-0.80247 0.55987
  -9   5   0   18.55    6.36  81-0.76698-0.57237 0.09452 0.48194-0.81068 0.46027
  -8   6   0    7.61    8.32  82-0.76661-0.40602 0.10277 0.63115-0.80782 0.53195
  -7   8  -3   12.47    9.00  82-0.76655-0.34745 0.10405 0.86524-0.80737 0.24216
  -5   2   3  104.46    4.03  82-0.76661 0.13812 0.10275 0.16735-0.80783 0.98074
  -5   8  -2   -4.17   12.21  82-0.76694 0.00729 0.09547 0.92162-0.81035 0.47490
  -4   4   2   95.30    6.23  82-0.76705 0.27879 0.09283 0.45451-0.81126 0.94941
  -4   9  -6    8.99    9.55  82-0.76662 0.00964 0.10263 0.99175-0.80787 0.03674
  -3   3   2   11.78    5.08  82-0.76703 0.42167 0.09321 0.32692-0.81113 0.97932
  -3   6   0  -16.84    9.46  82-0.76721 0.38081 0.08859 0.71711-0.81270 0.79285
  -1   7  -3  226.81    9.19  81-0.76714 0.57671 0.09049 0.82354-0.81206 0.53259
   0   4  -1   -7.20    5.92  82-0.76706 0.77805 0.09260 0.45113-0.81134 0.77077
   2   5  -6  267.28    5.08  82-0.76676 0.89434 0.09953 0.51667-0.80895 0.25325
  -7   8  -7   -0.42    3.97  83-0.76547-0.51899 0.11906 0.77278-0.80201-0.27703
  -6   6   1   35.16   10.50  83-0.76595-0.04886 0.11075 0.66898-0.80501 0.75740
  -6   8  -2    3.21    8.96  83-0.76608-0.14989 0.10846 0.89577-0.80583 0.41992
  -5   6   1   44.26   10.40  83-0.76563 0.10579 0.11652 0.67755-0.80293 0.80669
  -5   9  -6    0.70    7.87  83-0.76560-0.14942 0.11701 0.96515-0.80276-0.02252
  -5   9  -5   17.52    9.33  83-0.76551-0.10634 0.11842 0.98002-0.80224 0.10567
  -4   8  -2  -14.00   10.78  83-0.76605 0.16647 0.10896 0.92292-0.80565 0.52180
  -4   9  -7  -13.38    6.60  82-0.76621-0.03294 0.10598 0.96763-0.80671-0.09411
  -4   9  -5   40.65   10.33  83-0.76581 0.04992 0.11337 0.99891-0.80407 0.15911
  -3   5   1  186.50    7.70  82-0.76613 0.40563 0.10740 0.57620-0.80621 0.89099
  -3   9  -7    3.17    9.09  83-0.76589 0.12270 0.11199 0.97472-0.80457-0.04489
  -3   9  -6    2.68    9.95  83-0.76559 0.16380 0.11710 0.99201-0.80273 0.08024
  -2   4   1   13.62    6.25  83-0.76603 0.54805 0.10936 0.44627-0.80551 0.91889
  -1   8  -5    6.98    9.11  83-0.76600 0.50553 0.10993 0.90584-0.80530 0.29135
  -9   6  -1  -13.47    6.33  83-0.76503-0.60167 0.12540 0.57030-0.79966 0.34346
  -8   4   2  -17.73    6.01  84-0.76451-0.35107 0.13285 0.36137-0.79687 0.72965
  -7   6   1   -7.53    9.58  85-0.76385-0.21021 0.14155 0.62666-0.79356 0.69774
  -6   5   2  114.59    8.53  84-0.76402-0.02450 0.13932 0.52033-0.79441 0.85492
  -6   7   0   48.57    9.38  84-0.76496-0.08097 0.12638 0.77460-0.79929 0.64710
  -5   7   0  -20.80    9.88  84-0.76501 0.07881 0.12571 0.79171-0.79954 0.69722
  -5   9  -7    0.04    5.57  84-0.76493-0.19122 0.12691 0.93341-0.79910-0.15326
  -4   9  -8    3.42    6.08  83-0.76496-0.07570 0.12647 0.92501-0.79926-0.22839
  -3   9  -8    0.71    7.20  83-0.76500 0.08025 0.12582 0.93932-0.79950-0.17681
  -3   9  -5   64.55   11.07  84-0.76439 0.20382 0.13456 0.99357-0.79622 0.20544
  -1   2   1 1205.62    5.59  84-0.76457 0.67731 0.13198 0.15826-0.79720 0.91691
  -1   8 -10   -5.02    5.47  84-0.76433 0.30337 0.13530 0.77592-0.79595-0.35513
   0   7  -4    7.16    9.68  84-0.76433 0.68882 0.13530 0.77369-0.79595 0.43907
   1   7  -8  144.13    7.03  84-0.76450 0.67499 0.13304 0.71383-0.79680-0.01639
  -8   7  -1  -16.23    6.96  85-0.76368-0.43377 0.14157 0.71586-0.79358 0.40756
  -7   7   0   59.26   10.07  85-0.76252-0.23873 0.15511 0.73324-0.78828 0.58502
  -7   8  -2  -11.79    7.69  85-0.76354-0.30420 0.14325 0.84789-0.79293 0.35283
  -6   3   3   99.74    5.27  85-0.76317-0.01259 0.14771 0.24632-0.79120 0.93416
  -6   9  -6   14.35    5.89  86-0.76223-0.30992 0.15817 0.91092-0.78706-0.08888
  -6   9  -5    1.94    7.23  84-0.76363-0.26137 0.14216 0.93659-0.79335 0.04677
  -5   5   2    0.63    8.91  84-0.76363 0.13304 0.14216 0.52832-0.79335 0.90009
  -5   9  -4   11.38    8.56  85-0.76371-0.06630 0.14117 0.97874-0.79374 0.22536
  -4   6   1   -1.36   10.67  85-0.76287 0.25905 0.15119 0.65800-0.78983 0.84536
  -4   7   0   -2.06   11.84  85-0.76291 0.23042 0.15074 0.77912-0.79001 0.73945
  -4   9  -4    6.92    9.86  85-0.76358 0.08985 0.14283 0.99149-0.79310 0.27597
  -3   8  -2   22.75   11.07  84-0.76362 0.31789 0.14232 0.89861-0.79330 0.56115
  -2   8  -3   83.56    9.91  84-0.76399 0.43281 0.13761 0.90200-0.79510 0.48740
  -2   9  -7   -0.61    9.08  84-0.76345 0.27641 0.14438 0.95524-0.79250-0.00537
   0   2   0    9.21    3.51  84-0.76363 0.78962 0.14216 0.14316-0.79335 0.83826
   0   8  -8    9.36    7.71  85-0.76257 0.53313 0.15450 0.81595-0.78853-0.05731
   0   8  -7   -9.86    8.89  85-0.76277 0.58061 0.15228 0.83183-0.78940 0.07361
   1   5  -3  510.89    6.14  84-0.76380 0.86050 0.14003 0.52249-0.79417 0.57153
   1   7  -9  107.37    6.71  85-0.76266 0.63225 0.15352 0.67485-0.78891-0.15163
   1   7  -7  -13.97    7.27  85-0.76313 0.72545 0.14821 0.71349-0.79100 0.10404
  -9   7  -3    1.63    4.82  85-0.76175-0.67393 0.16337 0.63151-0.78505 0.09572
  -8   8  -5    1.70    4.57  87-0.76049-0.59787 0.17555 0.74242-0.78005-0.09387
  -8   8  -4  -10.58    5.28  87-0.76045-0.55843 0.17591 0.76507-0.77990 0.03403
  -7   3   3   36.40    5.31  87-0.76046-0.16834 0.17581 0.20657-0.77994 0.87207
  -7   5   2   87.63    8.22  86-0.76210-0.18373 0.15968 0.48350-0.78653 0.79412
  -6   8  -1   19.89   11.21  86-0.76097-0.11363 0.17103 0.85398-0.78192 0.52427
  -6   9  -4    8.39    7.03  85-0.76216-0.22256 0.15905 0.94180-0.78679 0.16700
  -5   3   3   28.74    5.48  86-0.76103 0.14640 0.17049 0.24189-0.78214 0.97794
  -5   8  -1   17.07   10.09  86-0.76184 0.04439 0.16239 0.87430-0.78545 0.57784
  -5   9  -8    3.66    4.18  85-0.76229-0.23462 0.15773 0.88039-0.78732-0.29214
  -3   9  -9   -4.29    5.26  86-0.76126 0.04326 0.16822 0.87752-0.78308-0.32290
  -3   9  -4   18.44   11.64  86-0.76128 0.24402 0.16805 0.98013-0.78315 0.31882
  -2   9  -8   -0.93    6.19  86-0.76210 0.23333 0.15972 0.92377-0.78652-0.14021
  -2   9  -6   13.45    8.61  85-0.76242 0.31753 0.15629 0.96700-0.78789 0.11703
  -1   6  -1  210.74    8.64  86-0.76187 0.64167 0.16213 0.65130-0.78555 0.73921
  -1   8  -4   20.29    9.01  85-0.76218 0.54382 0.15886 0.87671-0.78686 0.40073
   1   4  -2   74.38    6.10  86-0.76119 0.88558 0.16889 0.36975-0.78280 0.66723
   1   6  -4   22.16    7.58  86-0.76169 0.82977 0.16399 0.61828-0.78480 0.45953
   1   7  -6   15.17    7.88  87-0.76060 0.75789 0.17448 0.70952-0.78050 0.21907
   2   4  -4  369.06    4.54  86-0.76088 0.95942 0.17186 0.34335-0.78158 0.45881
  -8   8  -3   14.89    6.21  88-0.75836-0.51790 0.19251 0.76960-0.77292 0.15679
  -6   9  -7    6.54    3.97  87-0.76024-0.35138 0.17634 0.86872-0.77978-0.22368
  -5   9  -3  -27.91    9.21  87-0.76030-0.02223 0.17570 0.96464-0.78004 0.33797
  -4   2   3   51.61    4.09  87-0.75911 0.28680 0.18628 0.09910-0.77559 0.99757
  -4   8  -1   13.40   12.73  87-0.75966 0.19869 0.18148 0.86989-0.77762 0.62123
  -4   9  -9   -7.15    4.48  87-0.75951-0.11864 0.18279 0.85257-0.77707-0.38206
  -4   9  -3   25.70   11.72  88-0.75873 0.12731 0.18945 0.97042-0.77424 0.38637
  -3   4   2   99.31    7.76  87-0.75959 0.42812 0.18210 0.37795-0.77736 0.96727
  -2   1   2  276.11    3.39  87-0.75866 0.54352 0.18998-0.03590-0.77401 0.94883
  -2   6   0   36.61    9.21  87-0.76048 0.52793 0.17408 0.64608-0.78072 0.81185
  -2   9  -5   46.24    9.30  86-0.76014 0.35732 0.17721 0.96330-0.77942 0.23729
  -1   7  -2   44.37    9.19  86-0.76023 0.61223 0.17638 0.75618-0.77976 0.62961
   0   8  -9  -11.56    6.56  87-0.75955 0.49397 0.18243 0.76764-0.77722-0.19695
   0   8  -6    4.99    8.05  87-0.76012 0.61493 0.17743 0.83377-0.77932 0.18890
   2   2  -3   36.64    2.15  88-0.75716 0.97162 0.20191 0.05187-0.76882 0.53176
   2   5  -5  346.73    5.36  87-0.75941 0.93011 0.18365 0.45265-0.77671 0.34919
   2   6  -8   -8.39    4.82  89-0.75614 0.81845 0.20953 0.51314-0.76544-0.02439
  -9   5   1  -13.14    5.71  89-0.75598-0.54548 0.20946 0.38699-0.76590 0.54430
  -9   6   0   -1.87    6.03  88-0.75680-0.57034 0.20337 0.51263-0.76860 0.43946
  -9   7  -2  -10.90    5.16  88-0.75717-0.64051 0.20053 0.61834-0.76986 0.20726
  -8   6   1  -15.74    7.60  88-0.75780-0.37133 0.19559 0.55511-0.77201 0.62199
  -7   8  -1   15.89    9.58  88-0.75721-0.27284 0.20021 0.80787-0.76999 0.45956
  -6   9  -3    1.16    7.79  88-0.75807-0.18655 0.19339 0.93179-0.77297 0.28029
  -4   5   2   34.61    7.29  88-0.75815 0.28342 0.19277 0.49496-0.77323 0.93442
  -2   2   2  416.24    5.08  88-0.75691 0.55475 0.20249 0.09180-0.76899 0.96506
  -2   9  -9    3.81    5.76  89-0.75672 0.18610 0.20394 0.86595-0.76835-0.28983
  -1   3   1   17.59    6.71  88-0.75719 0.68203 0.20033 0.22773-0.76995 0.91147
  -1   5   0   20.30    7.37  88-0.75816 0.67070 0.19271 0.50043-0.77326 0.83448
   0   6  -2  109.00    7.39  87-0.75860 0.75398 0.18903 0.61814-0.77484 0.65261
   1   7 -10  -12.77    5.08  87-0.75790 0.58488 0.19477 0.60394-0.77237-0.29590
   2   6  -9   -2.44    4.66  88-0.75665 0.76912 0.20451 0.49075-0.76810-0.14568
   2   6  -7   11.94    5.61  89-0.75574 0.85715 0.21121 0.52917-0.76511 0.10443
  -8   5   2   15.68    6.68  89-0.75519-0.34349 0.21500 0.41242-0.76340 0.71719
  -8   7   0   24.93    8.14  89-0.75472-0.40604 0.21827 0.65677-0.76192 0.50710
  -8   8  -2   -5.82    6.66  89-0.75500-0.47386 0.21632 0.76037-0.76281 0.27355
  -7   9  -5   14.95    4.42  88-0.75603-0.42771 0.20892 0.85995-0.76613-0.03339
  -7   9  -4   -3.08    6.18  90-0.75408-0.39252 0.22261 0.87270-0.75994 0.08701
  -6   4   3   52.06    6.73  89-0.75466-0.00316 0.21871 0.32033-0.76172 0.92591
  -3   6   1  -10.52    8.82  89-0.75570 0.41169 0.21138 0.60963-0.76504 0.86992
  -3   9  -3  142.44   12.62  89-0.75538 0.27767 0.21362 0.95420-0.76403 0.42480
  -2   5   1   36.22    7.51  88-0.75595 0.55330 0.20949 0.48513-0.76588 0.90091
  -2   8  -2   65.83   10.44  88-0.75603 0.46836 0.20896 0.84986-0.76612 0.58623
  -2   9  -4   49.94   11.68  89-0.75525 0.39541 0.21455 0.94465-0.76361 0.34853
  -1   9  -8   18.23    7.77  89-0.75411 0.38252 0.22244 0.87811-0.76001-0.11629
  -1   9  -7  -16.01    8.69  89-0.75509 0.42780 0.21568 0.90475-0.76309 0.01479
   0   3   0   49.97    5.16  89-0.75560 0.79504 0.21208 0.21135-0.76472 0.83092
   0   5  -1  749.93    7.60  88-0.75632 0.77992 0.20678 0.48092-0.76709 0.74988
   0   7  -3  139.60    8.29  89-0.75566 0.72118 0.21160 0.71695-0.76494 0.53626
   0   8  -5  -21.24   10.24  89-0.75493 0.65355 0.21683 0.81459-0.76257 0.29978
   1  -1  -2  823.15    2.51  89-0.75497 0.81797 0.21652-0.38057-0.76271 0.53511
  -7   4   3    0.27    6.81  90-0.75135-0.16440 0.24153 0.28128-0.75084 0.86409
  -7   9  -6  -10.25    3.54  90-0.75363-0.46945 0.22716 0.82478-0.75760-0.17170
  -7   9  -3   -1.29    7.11  89-0.75381-0.34278 0.22594 0.87582-0.75817 0.21429
  -6   6   2  -16.97    9.68  90-0.75225-0.02261 0.23596 0.56420-0.75348 0.83404
  -6   7   1   -0.97    8.98  89-0.75433-0.04898 0.22251 0.69846-0.75975 0.73430
  -6   9  -2   -0.52    9.81  90-0.75223-0.15086 0.23608 0.90879-0.75343 0.38904
  -5   4   3   11.98    6.87  91-0.75144 0.14793 0.24097 0.31215-0.75110 0.96872
  -5   7   1    4.25    9.67  90-0.75346 0.10615 0.22822 0.70805-0.75711 0.78322
  -5   9  -2  226.49   10.04  89-0.75400 0.00549 0.22468 0.93351-0.75875 0.44665
  -4   3   3  330.31    6.08  90-0.75256 0.29149 0.23404 0.19309-0.75439 0.99850
  -4   9  -2  112.84   12.16  90-0.75209 0.16263 0.23698 0.93574-0.75300 0.49228
  -3   8  -1    5.01   10.89  89-0.75399 0.34892 0.22478 0.84181-0.75870 0.65349
  -1   8  -3   33.98    9.50  89-0.75448 0.57824 0.22148 0.83390-0.76022 0.50159
  -1   9  -6   -3.20    8.18  89-0.75433 0.46557 0.22251 0.91485-0.75975 0.14001
   0   8 -10   13.75    5.28  91-0.75128 0.43849 0.24196 0.69103-0.75063-0.35225
   1   7  -5   26.11    6.80  89-0.75403 0.79336 0.22448 0.68001-0.75884 0.32743
   2   6  -6   69.42    6.31  91-0.75037 0.89200 0.24735 0.51215-0.74804 0.21851
  -9   7  -1    7.96    5.37  91-0.74909-0.60795 0.25092 0.58779-0.74625 0.31235
  -7   6   2   19.83    8.89  91-0.74810-0.17965 0.25654 0.53181-0.74349 0.77369
  -7   7   1   39.59    9.42  91-0.75008-0.21034 0.24513 0.65931-0.74905 0.67292
  -6   8   0   10.97    8.80  91-0.75031-0.08110 0.24374 0.79880-0.74972 0.61940
  -5   6   2   32.83    9.75  91-0.75005 0.13233 0.24529 0.56900-0.74897 0.88030
  -5   8   0   -1.30    9.85  91-0.75037 0.07528 0.24340 0.81396-0.74988 0.67084
  -4  10  -6    4.99    7.29  91-0.74945 0.00609 0.24887 0.98642-0.74724-0.00350
  -2   3   2    7.32    6.37  92-0.74815 0.55966 0.25624 0.18029-0.74364 0.96612
  -1   9  -9   -8.69    5.74  91-0.74911 0.34202 0.25079 0.82437-0.74631-0.25577
  -1   9  -5   27.40   10.63  91-0.74909 0.50369 0.25092 0.90725-0.74624 0.25536
   2   3  -3  110.01    3.82  92-0.74683 0.97599 0.26352 0.13180-0.74003 0.52513
  -8   8  -1  -12.54    6.88  92-0.74665-0.43964 0.26616 0.73219-0.73898 0.37608
  -7   8   0   20.74    9.29  93-0.74528-0.24422 0.27337 0.75675-0.73534 0.55415
  -5  10  -6   -1.83    5.11  91-0.74794-0.15210 0.25918 0.95964-0.74246-0.05968
  -5  10  -5   20.80    6.03  92-0.74752-0.11006 0.26148 0.97904-0.74132 0.06803
  -4   7   1   71.86    9.55  91-0.74808 0.26089 0.25838 0.69243-0.74286 0.81973
  -4   8   0   14.25   12.29  93-0.74542 0.22573 0.27268 0.80505-0.73569 0.71007
  -4  10  -7   -8.00    5.14  92-0.74800-0.03412 0.25881 0.95661-0.74265-0.13691
  -4  10  -5   85.02    7.53  91-0.74851 0.04523 0.25595 0.99870-0.74405 0.12486
  -3   5   2   49.33    8.85  92-0.74662 0.42428 0.26635 0.43598-0.73889 0.95065
  -3  10  -7    0.21    6.91  91-0.74794 0.11854 0.25918 0.96521-0.74246-0.08413
  -3  10  -6   25.18    8.42  91-0.74774 0.15867 0.26025 0.98785-0.74193 0.04334
  -2   9  -3   31.15   12.32  92-0.74615 0.42617 0.26887 0.91486-0.73762 0.45076
   0   8  -4   -4.43   10.08  92-0.74584 0.68559 0.27048 0.78293-0.73681 0.40241
   1   2  -1  975.21    4.06  92-0.74678 0.88914 0.26546 0.01405-0.73933 0.70609
   1   6  -3    5.25    6.32  92-0.74788 0.85822 0.25947 0.54350-0.74232 0.54243
  -7   9  -2  -16.93    6.44  93-0.74512-0.31168 0.27404 0.85793-0.73493 0.31900
  -5   9  -1   94.24   11.55  93-0.74307 0.03663 0.28436 0.89148-0.72963 0.54611
  -5  10  -7   -4.43    4.58  92-0.74483-0.19601 0.27555 0.92135-0.73417-0.19457
  -5  10  -4   -9.41    6.75  92-0.74483-0.07126 0.27555 0.98220-0.73417 0.18734
  -4   6   2   42.00   10.10  93-0.74318 0.28195 0.28384 0.54394-0.72990 0.91285
  -4  10  -4    2.44    7.50  92-0.74483 0.08471 0.27555 0.99576-0.73417 0.23828
  -3   9  -2   65.27   10.43  92-0.74536 0.31315 0.27279 0.91493-0.73557 0.52597
  -3  10  -5  -15.41    7.89  92-0.74506 0.19918 0.27435 0.99392-0.73478 0.16264
  -1   4   1   13.31    6.46  93-0.74496 0.68410 0.27486 0.29682-0.73452 0.90045
  -1   7  -1    1.98    9.84  93-0.74483 0.63969 0.27555 0.67981-0.73417 0.70984
   0   4   0   -9.52    7.37  93-0.74341 0.79651 0.28266 0.28003-0.73051 0.81903
   1   5  -2   18.72    6.01  93-0.74508 0.88508 0.27422 0.40829-0.73484 0.64129
   1   7  -4   -7.72    8.59  93-0.74204 0.82383 0.28938 0.63484-0.72701 0.42145
   2   5  -4    4.85    5.29  93-0.74249 0.95550 0.28721 0.37007-0.72814 0.42995
  -9   6   1    2.60    5.37  93-0.74061-0.54309 0.29598 0.43835-0.72341 0.52154
  -8   7   1   -1.93    7.84  95-0.73830-0.37995 0.30651 0.58777-0.71776 0.59195
  -6   5   3   22.12    7.76  94-0.74075-0.00368 0.29531 0.38464-0.72377 0.91104
  -6   9  -1   21.38    8.43  93-0.74159-0.11904 0.29137 0.87260-0.72585 0.48931
  -6  10  -5    1.50    4.30  93-0.74150-0.27237 0.29176 0.93183-0.72565 0.00029
  -6  10  -4    3.69    6.26  94-0.73876-0.23482 0.30447 0.94236-0.71887 0.12100
  -4   4   3   10.16    5.71  94-0.74121 0.29439 0.29316 0.27345-0.72490 0.99204
  -4   9  -1   16.97   11.85  94-0.73880 0.19067 0.30428 0.89091-0.71897 0.58604
  -4  10  -8    1.69    4.01  93-0.74190-0.08541 0.28986 0.90406-0.72664-0.27947
  -3  10  -8   -4.95    4.42  94-0.74169 0.07896 0.29089 0.91762-0.72610-0.23116
  -3  10  -4   32.33   10.38  94-0.73932 0.23530 0.30194 0.98625-0.72022 0.27578
  -2   6   1  300.17   11.41  94-0.73921 0.54670 0.30242 0.53800-0.71997 0.87717
  -2   8  -1   26.30   10.84  94-0.74159 0.49327 0.29135 0.79040-0.72586 0.67237
  -2  10  -7   -3.53    7.67  93-0.74150 0.26787 0.29176 0.94571-0.72565-0.04927
  -2  10  -6   13.64    9.14  94-0.73939 0.30820 0.30160 0.96299-0.72041 0.07179
  -1   6   0  245.23    8.97  93-0.74240 0.66533 0.28744 0.54616-0.72791 0.80982
  -1   8  -2   13.71    9.59  94-0.74090 0.60630 0.29460 0.77999-0.72414 0.59322
  -1   9  -4   62.66    9.00  93-0.74159 0.53691 0.29136 0.88556-0.72586 0.36495
   0   7  -2   33.07   10.29  94-0.74030 0.74735 0.29740 0.64843-0.72265 0.61992
   0   9  -7   15.68    7.73  94-0.73934 0.56454 0.30184 0.82751-0.72028 0.02469
   1   3  -1   14.61    4.28  94-0.74082 0.89517 0.29501 0.12346-0.72393 0.71392
   1   8  -8   -7.03    6.33  95-0.73796 0.66966 0.30805 0.68373-0.71692-0.07970
   1   8  -7    5.73    7.22  93-0.74143 0.71027 0.29210 0.71258-0.72547 0.05870
   2   6  -5    5.07    5.85  94-0.73838 0.92142 0.30615 0.47129-0.71795 0.31381
  -9   7   0    9.44    5.30  95-0.73610-0.57779 0.31563 0.54108-0.71274 0.40627
  -8   4   3   33.17    5.22  96-0.73392-0.34004 0.32482 0.18448-0.70762 0.77278
  -8   6   2  -28.41    7.26  95-0.73625-0.35212 0.31498 0.46198-0.71310 0.68983
  -8   9  -3   -7.90    4.70  95-0.73590-0.51733 0.31647 0.78211-0.71227 0.11376
  -7   5   3   16.27    7.05  95-0.73630-0.16647 0.31474 0.34910-0.71323 0.84888
  -6  10  -6    1.80    3.58  94-0.73827-0.31867 0.30608 0.90037-0.71796-0.13550
  -5   5   3   14.53    6.82  95-0.73761 0.14788 0.30902 0.38365-0.71636 0.95356
  -5  10  -3   34.50    7.64  94-0.73780-0.03691 0.30818 0.97112-0.71682 0.29938
  -4  10  -3    8.06    9.98  95-0.73672 0.11866 0.31294 0.97990-0.71422 0.34658
  -3  -1   2   43.68    1.15  97-0.72686 0.33027 0.35257-0.49763-0.69165 0.77200
  -3   7   1  195.72   12.63  95-0.73669 0.40153 0.31307 0.65244-0.71415 0.84270
  -3   8   0   55.98   13.42  95-0.73678 0.37441 0.31270 0.77316-0.71435 0.73767
  -2   4   2  177.01    6.47  94-0.73789 0.56339 0.30780 0.26910-0.71702 0.95833
  -2  10  -8   16.67    5.84  95-0.73608 0.22142 0.31571 0.90653-0.71269-0.18933
  -2  10  -5    2.44    9.63  95-0.73541 0.34637 0.31857 0.96548-0.71111 0.19076
   0   6  -1    6.90    7.65  94-0.73843 0.77625 0.30537 0.52240-0.71834 0.72314
   0   9  -8    8.19    6.79  95-0.73547 0.52136 0.31830 0.79704-0.71126-0.11332
   0   9  -6    2.85    9.09  95-0.73526 0.60394 0.31921 0.83335-0.71076 0.14293
   1   8  -9  -16.38    5.37  94-0.73782 0.61969 0.30813 0.65050-0.71685-0.20144
   1   8  -6   31.84    8.24  94-0.73709 0.74743 0.31130 0.71254-0.71512 0.17777
   3   4  -7   23.66    1.99  98-0.72379 0.95351 0.36381 0.10759-0.68495 0.03289
  -8   8   0    2.47    7.12  96-0.73281-0.41182 0.32925 0.68413-0.70507 0.47241
  -7   9  -1   -1.13    6.64  96-0.73383-0.28349 0.32505 0.82530-0.70743 0.42043
  -6   7   2   -5.79   10.39  96-0.73198-0.02765 0.33260 0.61203-0.70317 0.80501
  -6   8   1   -5.06   10.52  97-0.73097-0.06079 0.33666 0.73061-0.70085 0.70105
  -6  10  -3   19.12    5.96  96-0.73357-0.19696 0.32614 0.93852-0.70683 0.23725
  -5   8   1   -2.34   11.76  96-0.73190 0.10148 0.33295 0.74535-0.70297 0.75002
  -3   2   3   -3.82    4.26  96-0.73102 0.41407 0.33644-0.03784-0.70098 0.97517
  -2   9  -2   37.78   12.50  96-0.73293 0.45782 0.32875 0.87127-0.70535 0.54841
   0   8  -3   -5.08   10.63  95-0.73400 0.71108 0.32435 0.73983-0.70783 0.49913
   1   1  -1  511.25    1.81  97-0.72905 0.85946 0.34415-0.20565-0.69652 0.64088
   2   0  -4    6.82    1.65  96-0.72959 0.87708 0.34206-0.39123-0.69774 0.28941
   2   4  -3  -10.32    4.45  97-0.73000 0.97670 0.34045 0.19885-0.69867 0.50728
  -8   9  -2   -1.11    5.01  97-0.72836-0.48673 0.34543 0.76898-0.69602 0.22975
  -7   7   2    8.05    8.82  97-0.72663-0.19108 0.35195 0.57404-0.69220 0.74369
  -5   7   2   25.72    9.06  96-0.72962 0.12447 0.34051 0.61507-0.69888 0.85280
  -3   3   3   27.87    6.09  97-0.72877 0.42599 0.34382 0.09499-0.69696 0.99206
  -3   6   2   -6.06   10.20  97-0.72752 0.42426 0.34860 0.49504-0.69417 0.92848
  -3   9  -1    8.06   10.46  97-0.72954 0.33832 0.34083 0.86683-0.69869 0.61601
  -3  10  -3   -3.75    8.97  96-0.72963 0.26804 0.34050 0.96601-0.69888 0.38239
  -2  10  -4   20.28   10.56  97-0.72794 0.38052 0.34701 0.95416-0.69510 0.30231
  -1   5   1   -0.80    7.55  96-0.72963 0.68059 0.34050 0.36986-0.69888 0.88438
  -1   9  -3   54.16   11.74  97-0.72838 0.56602 0.34535 0.85258-0.69607 0.46169
   0   9  -9   -7.65    5.08  97-0.72748 0.47600 0.34878 0.74002-0.69406-0.25688
   0   9  -5   35.67   10.09  97-0.72689 0.63890 0.35099 0.82405-0.69277 0.25409
   1   4  -1   12.19    6.44  98-0.72673 0.89715 0.35159 0.21111-0.69241 0.70582
   1   8  -5    3.92    8.84  97-0.72855 0.77882 0.34469 0.69567-0.69645 0.28536
   2   7  -8   72.12    5.30  97-0.72782 0.79794 0.34745 0.51540-0.69484-0.06662
   2   7  -7   -7.83    5.30  98-0.72541 0.84204 0.35650 0.52607-0.68950 0.05190
  -7   8   1   39.78    7.29  98-0.72565-0.22223 0.35597 0.69245-0.69001 0.63658
  -7  10  -4  -13.35    4.38  98-0.72371-0.40387 0.36304 0.87114-0.68578 0.03466
  -6   9   0   95.68    8.36  98-0.72477-0.09747 0.35918 0.82203-0.68809 0.58039
  -6  10  -2   15.51    7.65  97-0.72463-0.16271 0.35971 0.92084-0.68778 0.34496
  -5   9   0   31.85    9.21  97-0.72548 0.06481 0.35661 0.84229-0.68962 0.63143
  -5  10  -2  -13.29    7.51  98-0.72550-0.00789 0.35654 0.94838-0.68967 0.39992
  -4   5   3   39.24    6.95  97-0.72567 0.29429 0.35589 0.35202-0.69005 0.97872
  -4   8   1   73.41   10.51  98-0.72480 0.24682 0.35911 0.73124-0.68814 0.78667
  -4  10  -2   -1.98   10.34  97-0.72550 0.14937 0.35654 0.95205-0.68967 0.44828
  -1  10  -7    9.62    7.52  98-0.72375 0.40732 0.36289 0.89696-0.68587-0.03939
  -1  10  -6    6.85    8.94  97-0.72550 0.44909 0.35654 0.91450-0.68967 0.09333
   0   5   0   -7.17    7.15  97-0.72623 0.79289 0.35383 0.35307-0.69127 0.80172
   1   6  -2  -17.36    8.38  97-0.72550 0.87412 0.35654 0.46213-0.68967 0.61549
   1   7  -3   64.77    9.13  98-0.72298 0.84672 0.36567 0.57850-0.68419 0.50750
   2   7  -6    2.75    6.88  98-0.72148 0.87554 0.37094 0.52748-0.68099 0.17164
  -8   5   3   12.48    5.77  99-0.71840-0.34166 0.38218 0.26822-0.67413 0.75955
  -7  10  -3   -1.32    4.99  99-0.72025-0.36762 0.37589 0.87528-0.67802 0.15647
  -6   6   3  -13.51    6.95  99-0.72132-0.00959 0.37219 0.44859-0.68029 0.88913
  -5   6   3  -26.21    9.33  99-0.71862 0.14417 0.38144 0.45273-0.67459 0.93215
  -4   7   2  -18.56    9.04  99-0.72108 0.27505 0.37301 0.59675-0.67979 0.88479
  -4   9   0   14.28   12.04  98-0.72073 0.21450 0.37424 0.83612-0.67904 0.67076
  -3   4   3   65.75    7.53  99-0.71937 0.42940 0.37891 0.20309-0.67616 0.99293
  -2   5   2  128.28    7.70  98-0.72201 0.55964 0.36977 0.34730-0.68177 0.94535
  -2   8   0  -29.40   13.32  99-0.71882 0.51222 0.38075 0.72080-0.67502 0.74909
  -1   8  -1    9.93   12.26  99-0.71827 0.62771 0.38260 0.71728-0.67387 0.67322
  -1  10  -8   -2.20    5.77 100-0.71662 0.35892 0.38810 0.85682-0.67043-0.18400
   2   6  -4   53.85    6.42  99-0.71815 0.94271 0.38304 0.41597-0.67360 0.40151
   2   7  -9    0.14    4.16 101-0.71089 0.74199 0.40643 0.43559-0.65870-0.23568
  -9   7   1    6.78    5.61 100-0.71387-0.55627 0.39755 0.47659-0.66467 0.48295
  -8   9  -1   -7.54    5.36  99-0.71679-0.45598 0.38808 0.74557-0.67068 0.33076
  -7   6   3   -3.24    7.81 100-0.71380-0.17818 0.39777 0.41060-0.66453 0.82463
  -7   9   0   25.60    6.53 100-0.71679-0.25921 0.38807 0.78137-0.67068 0.51046
  -6   3   4   -1.29    4.54 100-0.71300-0.01794 0.40032 0.01549-0.66289 0.93235
  -3  10  -2    1.87   11.17 100-0.71528 0.29448 0.39302 0.93566-0.66755 0.47807
  -2   0   2 1381.99    1.67 103-0.70130 0.47398 0.43528-0.42419-0.63971 0.79319
  -2  10  -3    3.43   10.86 100-0.71546 0.40909 0.39242 0.93158-0.66794 0.40213
  -1  10  -5    2.81    7.96  99-0.71771 0.48428 0.38503 0.91352-0.67259 0.20254
   0   7  -1   -3.79   10.50 100-0.71483 0.76399 0.39446 0.57260-0.66664 0.69158
   0   9  -4    5.14    8.74  99-0.71679 0.66743 0.38808 0.80222-0.67068 0.35722
   2   5  -3  316.99    6.17 100-0.71406 0.96793 0.39695 0.28049-0.66505 0.49422
   3   4  -6  553.76    2.87 101-0.70711 0.97841 0.41842 0.07397-0.65107 0.12572
  -8   7   2   11.03    7.02 101-0.70964-0.36662 0.41045 0.50339-0.65640 0.65690
  -8   8   1  -13.40    6.87 101-0.70944-0.39219 0.41104 0.62919-0.65601 0.54669
  -7  10  -2    1.74    5.49 100-0.71177-0.33294 0.40384 0.86524-0.66070 0.26624
  -6   4   4    7.87    6.53 101-0.70730-0.00966 0.41752 0.13894-0.65174 0.94146
  -6  10  -1   -6.39    8.18 101-0.70899-0.13326 0.41243 0.89436-0.65510 0.43646
  -5   3   4  -14.12    5.39 102-0.70670 0.13043 0.41930 0.01467-0.65056 0.97140
  -5  10  -1   24.56    7.73 101-0.71107 0.01913 0.40604 0.91412-0.65927 0.49579
  -5  11  -5   -0.70    4.87 100-0.71163-0.13210 0.40429 0.97152-0.66040 0.00839
  -4  11  -6   14.76    4.61 101-0.71146-0.01926 0.40482 0.97392-0.66006-0.06861
  -4  11  -5   -9.83    5.19 101-0.71206 0.03057 0.40295 0.99453-0.66127 0.05693
  -3   8   1   17.75   10.69 101-0.71036 0.38911 0.40823 0.69857-0.65785 0.80792
  -3  11  -6    9.80    5.89 101-0.70857 0.13383 0.41370 0.97838-0.65426-0.02384
  -2   9  -1  -16.59   10.46 101-0.71243 0.48176 0.40179 0.82137-0.66202 0.63038
  -1   6   1   34.12   11.11 101-0.70881 0.67368 0.41296 0.43983-0.65475 0.86280
  -1   9  -2   -4.47   10.19 100-0.71179 0.58915 0.40378 0.80977-0.66074 0.55055
   0   8  -2   63.69    9.01 101-0.71140 0.73409 0.40501 0.68403-0.65994 0.58174
   1   5  -1    2.84    6.31 100-0.71179 0.89126 0.40378 0.29639-0.66074 0.69355
   1   8  -4   34.08    7.43 101-0.71180 0.80714 0.40376 0.66183-0.66075 0.37793
   2   7  -5    1.38    6.46 100-0.71089 0.90188 0.40659 0.50750-0.65891 0.27651
  -6   8   2   32.49   10.04 102-0.70338-0.04431 0.42846 0.65471-0.64465 0.76913
  -5  11  -4    9.34    4.83 101-0.70623-0.09706 0.42011 0.98120-0.65025 0.12502
  -4   6   3  -16.73    8.03 102-0.70600 0.28704 0.42081 0.42907-0.64979 0.95805
  -4  10  -1   32.17    9.26 101-0.70667 0.17189 0.41881 0.91481-0.65112 0.53890
  -4  11  -4   -2.67    6.21 102-0.70675 0.06639 0.41857 0.99917-0.65127 0.17507
  -3   5   3  198.59    9.06 102-0.70445 0.42541 0.42536 0.29697-0.64674 0.98405
  -3   7   2   54.22   11.62 102-0.70412 0.41252 0.42633 0.55757-0.64609 0.90018
  -3   9   0    4.28   10.48 101-0.70684 0.35707 0.41829 0.81009-0.65146 0.69600
  -3  11  -7   12.53    4.74 102-0.70490 0.08809 0.42404 0.94581-0.64762-0.15714
  -3  11  -5   19.62    5.99 101-0.70685 0.17457 0.41826 0.99319-0.65148 0.10249
  -1  10  -4   18.13    8.96 101-0.70678 0.51547 0.41847 0.90075-0.65134 0.30944
   0   6   0  378.38   10.31 102-0.70465 0.78367 0.42478 0.42444-0.64713 0.78014
   3   5  -7    4.98    2.82 104-0.69433 0.93768 0.45360 0.16025-0.62727-0.00152
  -8   6   3   -6.42    7.07 104-0.69462-0.35300 0.45267 0.33858-0.62806 0.73435
  -7   4   4   14.85    5.17 104-0.69327-0.18219 0.45626 0.08650-0.62552 0.86885
  -6   9   1  -12.07    7.96 103-0.70066-0.07276 0.43603 0.77042-0.63962 0.65505
  -5   4   4  -15.40    6.34 103-0.69903 0.13676 0.44062 0.13471-0.63647 0.98065
  -5   8   2  -19.00    9.09 103-0.70141 0.11214 0.43392 0.66660-0.64107 0.81568
  -5   9   1   22.15    9.22 103-0.70021 0.07939 0.43732 0.78141-0.63874 0.70761
  -5  11  -3  -15.54    6.32 103-0.69806-0.05765 0.44329 0.97896-0.63462 0.23429
  -3  11  -4    0.95    7.87 102-0.70109 0.21024 0.43484 0.99266-0.64044 0.21727
  -2   6   2  343.90    9.55 102-0.70131 0.54993 0.43421 0.42588-0.64087 0.92571
  -2  10  -2    6.31   11.39 103-0.69728 0.43346 0.44544 0.89921-0.63313 0.49497
  -1   3   2   52.27    5.59 103-0.70023 0.66734 0.43726 0.01063-0.63878 0.90793
   0  -1  -1  171.71    1.50 102-0.70241 0.65206 0.43107-0.58964-0.64301 0.49170
   0   3   1   57.76    6.95 103-0.69796 0.78001 0.44357-0.00004-0.63443 0.82845
   0   9  -3   37.11   11.08 103-0.69743 0.69228 0.44505 0.76837-0.63340 0.45260
   1   9  -8   12.92    5.91 103-0.69581 0.63636 0.44946 0.67852-0.63032-0.14133
   1   9  -7    4.56    6.72 102-0.70066 0.68329 0.43603 0.71170-0.63963-0.00509
   1   9  -6   35.29    7.91 103-0.69669 0.72287 0.44707 0.72218-0.63199 0.11972
  -8   9   0    9.12    5.58 103-0.69552-0.43668 0.45019 0.70496-0.62970 0.41737
  -7   8   2   42.92    7.21 104-0.69561-0.21073 0.44994 0.61816-0.62987 0.70270
  -7  10  -1   -6.07    5.11 104-0.69539-0.30438 0.45054 0.84401-0.62945 0.35971
  -6   5   4   -2.11    7.21 103-0.69557-0.00716 0.45006 0.24489-0.62979 0.93615
  -6   7   3    1.70    7.93 103-0.69577-0.02402 0.44951 0.51113-0.63017 0.85883
  -6  11  -4   -3.40    4.05 104-0.69325-0.26491 0.45626 0.93516-0.62541 0.04697
  -5   7   3  -22.25   10.57 104-0.69247 0.13116 0.45832 0.51773-0.62395 0.90397
  -4   8   2    2.27   11.86 103-0.69557 0.25912 0.45006 0.65311-0.62979 0.84821
  -4   9   1   47.70   11.85 104-0.69230 0.22860 0.45877 0.77394-0.62363 0.74403
  -4  11  -3   -0.65    6.30 104-0.69625 0.09685 0.44820 0.99064-0.63109 0.28284
  -3  10  -1   -3.63    9.30 104-0.69424 0.31563 0.45364 0.89639-0.62726 0.56558
  -2  11  -7   14.47    5.12 104-0.69299 0.23297 0.45697 0.92834-0.62491-0.12968
  -2  11  -6  -14.13    5.23 104-0.69566 0.28495 0.44981 0.95482-0.62996 0.00111
  -2  11  -5    7.79    7.67 104-0.69186 0.31598 0.45994 0.96841-0.62279 0.12350
  -1   2   2  411.78    5.64 104-0.69295 0.64707 0.45707-0.14704-0.62484 0.87257
  -1   4   2   19.26    6.58 103-0.69474 0.67406 0.45229 0.13690-0.62822 0.91826
   0   4   1   -4.74    7.92 104-0.69270 0.78783 0.45773 0.12649-0.62436 0.83920
   0  10  -7   -0.61    6.72 103-0.69557 0.53313 0.45006 0.82307-0.62979-0.04270
   0  10  -6    5.61    8.14 103-0.69543 0.57472 0.45042 0.83921-0.62953 0.08304
   1   7  -2   56.51    7.74 103-0.69583 0.86072 0.44935 0.51398-0.63028 0.58333
   3   5  -6   -0.88    3.31 104-0.69083 0.97177 0.46262 0.16706-0.62088 0.11860
  -7   7   3   -7.82    7.84 105-0.68650-0.18911 0.47210 0.47771-0.61384 0.79358
  -7   9   1  -17.34    6.41 105-0.68956-0.24212 0.46427 0.72752-0.61952 0.58778
  -6  10   0   13.23    8.10 105-0.68515-0.12018 0.47549 0.85029-0.61136 0.52483
  -6  11  -3   -5.28    4.67 105-0.68669-0.22824 0.47161 0.93958-0.61421 0.16503
  -5   5   4   -8.96    7.65 106-0.68320 0.13381 0.48034 0.23406-0.60778 0.97627
  -5  10   0   57.89    9.81 105-0.68759 0.03529 0.46932 0.86937-0.61587 0.58137
  -4   3   4  104.82    6.12 105-0.68489 0.26597 0.47615-0.02978-0.61087 0.98158
  -3  11  -3   16.08    8.82 104-0.68866 0.24027 0.46659 0.98003-0.61785 0.32260
  -2   8   1  -33.03   13.18 105-0.68594 0.52335 0.47352 0.64550-0.61281 0.81380
  -1   8   0  -22.31   10.53 104-0.68914 0.63865 0.46535 0.64972-0.61874 0.74302
  -1  10  -3   30.98    8.97 104-0.69028 0.54143 0.46240 0.87712-0.62087 0.40712
   0   2   1   -0.20    4.12 105-0.68786 0.75627 0.46862-0.16585-0.61637 0.78810
   0  10  -8   -3.99    5.10 105-0.68580 0.48954 0.47386 0.77691-0.61255-0.18897
   0  10  -5    0.45    8.78 104-0.68914 0.60949 0.46535 0.83982-0.61874 0.20027
   1   6  -1  110.73    8.86 105-0.68682 0.88100 0.47129 0.37220-0.61443 0.67390
   1   8  -3   23.01    7.95 104-0.68941 0.82701 0.46466 0.62131-0.61924 0.46426
   1   9  -5    5.42    8.78 105-0.68619 0.75414 0.47287 0.71550-0.61328 0.22434
   2   3  -2   26.47    3.97 105-0.68729 0.95619 0.47008-0.05724-0.61532 0.53048
   2   4  -2   -3.67    5.29 105-0.68603 0.96841 0.47328 0.07967-0.61298 0.54823
   2   6  -3   22.36    6.99 105-0.68783 0.95615 0.46871 0.35033-0.61631 0.46853
   2   7  -4    4.53    7.33 105-0.68559 0.92488 0.47439 0.46549-0.61216 0.35793
   2   8  -7    1.09    6.34 105-0.68359 0.81107 0.47938 0.54192-0.60849-0.00562
  -7   5   4   12.29    5.87 106-0.68162-0.18008 0.48395 0.19918-0.60519 0.86739
  -5  11  -2   -6.41    5.82 106-0.68294-0.03338 0.48069 0.96189-0.60761 0.33879
  -4   4   4   -4.39    6.76 106-0.68016 0.27538 0.48750 0.09963-0.60254 0.99717
  -4  10   0   15.76   10.76 106-0.68153 0.18788 0.48416 0.86956-0.60503 0.62025
  -4  11  -2  -12.79    8.36 106-0.68009 0.12102 0.48766 0.97053-0.60241 0.38420
  -3   6   3  -14.70    8.42 106-0.68194 0.41723 0.48315 0.38084-0.60578 0.96755
  -2   3   3   16.21    5.34 106-0.68224 0.53422 0.48241-0.02748-0.60633 0.95317
  -2   4   3   -9.07    7.63 106-0.67891 0.54402 0.49051 0.10509-0.60027 0.96879
  -2   9   0    2.84   10.65 105-0.68439 0.49125 0.47710 0.76601-0.61026 0.70581
  -2  11  -4    1.87    7.30 106-0.68282 0.35286 0.48098 0.96465-0.60740 0.23656
  -1   9  -1   15.51   10.45 105-0.68382 0.60583 0.47853 0.76032-0.60921 0.62875
   0   8  -1   11.66   11.48 106-0.68103 0.74773 0.48538 0.62342-0.60412 0.65405
   2   8  -8   30.05    5.22 106-0.67752 0.76231 0.49381 0.50841-0.59777-0.14213
   2   8  -6   10.21    6.39 107-0.67769 0.84828 0.49340 0.54938-0.59808 0.11060
   3   4  -5   32.55    2.75 107-0.67435 0.98899 0.50126 0.01110-0.59208 0.19696
  -8   8   2   -0.25    6.12 107-0.67265-0.38906 0.50540 0.54818-0.58880 0.61187
  -6  11  -2    2.48    5.34 107-0.67470-0.20127 0.50064 0.92805-0.59247 0.27321
  -4   7   3  -36.75    9.32 107-0.67778 0.27254 0.49340 0.50010-0.59799 0.93174
  -3   9   1   66.06   12.20 107-0.67451 0.36674 0.50109 0.74746-0.59212 0.76567
  -2   7   2   64.99   13.24 106-0.67618 0.53951 0.49720 0.49934-0.59510 0.89876
  -1   5   2   14.43    7.77 106-0.67927 0.67247 0.48984 0.24197-0.60068 0.91452
   0   5   1   -2.29    7.48 107-0.67751 0.78646 0.49404 0.23204-0.59750 0.83556
   0   7   0  179.13    9.60 106-0.67698 0.76917 0.49530 0.49444-0.59655 0.75176
   0   9  -2    4.47   11.48 107-0.67330 0.70938 0.50389 0.72889-0.58997 0.53261
   1   3   0  109.81    6.10 107-0.67357 0.86914 0.50327-0.06436-0.59044 0.70764
   2   5  -2   27.61    6.42 107-0.67125 0.96803 0.50858 0.18806-0.58633 0.54431
  -8   9   1   -7.42    5.23 107-0.67004-0.41486 0.51103 0.65687-0.58449 0.49845
  -7  10   0   -4.59    5.07 108-0.67087-0.28749 0.50914 0.80709-0.58597 0.44639
  -6   6   4   -9.01    8.27 108-0.66765-0.02425 0.51639 0.32840-0.58028 0.91733
  -4   2   4   -3.04    3.54 108-0.66765 0.23485 0.51638-0.21306-0.58029 0.93056
  -4   5   4   41.31    8.20 108-0.66760 0.27493 0.51651 0.21112-0.58019 0.99683
  -3   8   2   18.55   10.44 107-0.67187 0.39197 0.50687 0.61998-0.58774 0.86580
  -3  10   0   24.28   11.14 108-0.66810 0.33058 0.51539 0.84939-0.58107 0.64515
  -3  11  -2   -0.66    8.99 107-0.67047 0.26371 0.51006 0.95760-0.58525 0.41791
  -2   2   3    7.80    4.85 108-0.66779 0.50787 0.51608-0.20267-0.58053 0.90609
  -2   5   3  495.72    9.65 108-0.66671 0.54316 0.51847 0.22120-0.57864 0.96870
  -2  10  -1   26.02    9.76 107-0.67243 0.45143 0.50558 0.85912-0.58874 0.57862
  -2  11  -3    5.00    9.06 107-0.66990 0.37746 0.51135 0.95088-0.58425 0.34057
  -1  10  -2   29.68   11.22 108-0.66913 0.56153 0.51307 0.84432-0.58290 0.49690
  -1  11  -7   -4.04    5.09 108-0.66700 0.37290 0.51784 0.87936-0.57914-0.12490
  -1  11  -6   -2.99    5.27 107-0.67070 0.41089 0.50953 0.91194-0.58567 0.01130
  -1  11  -5   15.62    7.50 108-0.66600 0.44790 0.52003 0.92198-0.57740 0.13057
   0  10  -4   70.84    8.23 107-0.67139 0.63837 0.50796 0.82616-0.58689 0.30147
   1   4   0   35.43    5.94 107-0.67261 0.88107 0.50518 0.07172-0.58905 0.72878
   1   9  -4    1.62    7.90 107-0.67047 0.77925 0.51006 0.69690-0.58525 0.32370
   2   8  -5   -5.70    7.33 109-0.66392 0.87754 0.52460 0.53946-0.57375 0.21418
   3   3  -5    0.35    1.37 113-0.63568 0.93824 0.58116-0.21157-0.52598 0.10777
   3   5  -5    3.35    3.79 109-0.65953 0.98940 0.53400 0.11957-0.56615 0.19197
  -8   7   3   14.82    6.02 109-0.66131-0.37333 0.53036 0.40274-0.56901 0.69917
  -7   6   4   22.46    6.71 109-0.65834-0.19068 0.53667 0.28841-0.56387 0.85013
  -6   8   3   28.87    9.15 109-0.66019-0.04674 0.53275 0.56949-0.56706 0.82160
  -6   9   2   -5.12    7.80 109-0.66425-0.06827 0.52402 0.70469-0.57411 0.72010
  -5   6   4   -1.04    7.57 109-0.66384 0.12761 0.52492 0.33006-0.57339 0.96155
  -5   9   2   -7.21    9.26 108-0.66420 0.08496 0.52414 0.71461-0.57402 0.77196
  -5  11  -1    5.90    6.09 109-0.66260-0.01502 0.52760 0.93512-0.57124 0.43072
   1   5   0   18.64    8.08 109-0.66168 0.88237 0.52956 0.18965-0.56965 0.73005
   1   8  -2   73.09   10.23 109-0.66032 0.84017 0.53248 0.57192-0.56728 0.54225
   3   6  -7   13.21    3.15 110-0.65515 0.91350 0.54328 0.21086-0.55842-0.04940
   3   6  -6    3.93    4.30 110-0.65516 0.95332 0.54327 0.22966-0.55842 0.07780
  -7   9   2   18.33    7.26 109-0.65697-0.22845 0.53887 0.66518-0.56187 0.65601
  -6  10   1   47.13    8.07 110-0.65432-0.11249 0.54434 0.79855-0.55735 0.60103
  -6  11  -1   -0.48    5.50 110-0.65513-0.17855 0.54268 0.90585-0.55873 0.36781
  -5   8   3  -13.86    8.63 110-0.65767 0.10978 0.53740 0.58374-0.56308 0.86713
  -5  10   1   39.95    7.99 110-0.65661 0.04918 0.53962 0.81980-0.56125 0.65472
  -4   9   2   24.76   11.20 110-0.65451 0.23182 0.54395 0.70767-0.55768 0.80550
  -4  11  -1   20.79    7.14 110-0.65777 0.13723 0.53719 0.94135-0.56325 0.47453
  -3   7   3  527.46   10.16 110-0.65583 0.40099 0.54123 0.46516-0.55993 0.94280
  -2  -1   1  123.79    1.47 111-0.65005 0.36798 0.55300-0.70287-0.55009 0.55357
  -1  -1   0   72.73    1.42 110-0.65155 0.48520 0.54998-0.70433-0.55264 0.47953
  -1  11  -4   82.19    8.67 109-0.65619 0.47897 0.54050 0.91871-0.56053 0.24433
   0   6   1   25.77    8.97 109-0.65730 0.77865 0.53817 0.33010-0.56245 0.82193
   1   7  -1   29.89    8.07 109-0.65842 0.86714 0.53584 0.44748-0.56436 0.64350
   2   2  -2    5.60    2.45 111-0.64997 0.90713 0.55317-0.28088-0.54996 0.44081
   2   7  -3  -17.31    6.32 110-0.65684 0.93976 0.53913 0.41572-0.56166 0.43510
  -7   8   3   -6.75    6.22 111-0.65017-0.21106 0.55301 0.54099-0.55017 0.75073
  -4   6   4  -15.25    9.88 110-0.65005 0.27035 0.55324 0.31374-0.54998 0.98482
  -4   8   3   39.55   11.49 111-0.64690 0.25214 0.55950 0.57058-0.54466 0.89757
  -4  10   1    2.13    8.42 111-0.64838 0.19720 0.55657 0.81874-0.54716 0.69102
  -4  12  -4   -6.99    4.63 111-0.64608 0.02102 0.56112 0.99634-0.54328 0.09001
  -3   4   4   19.16    7.28 111-0.64721 0.39919 0.55890 0.04113-0.54517 0.98966
  -2   6   3   94.05   10.98 111-0.64776 0.53870 0.55781 0.32034-0.54611 0.95689
  -2   9   1    1.81   10.47 111-0.64823 0.49633 0.55687 0.70615-0.54691 0.77033
  -2  11  -2   -3.31    9.50 111-0.64742 0.39778 0.55848 0.92839-0.54554 0.43066
  -1   8   1  -14.73   10.82 111-0.64957 0.64284 0.55421 0.57943-0.54916 0.80041
  -1   9   0   -0.95   10.15 111-0.65005 0.61412 0.55324 0.70680-0.54998 0.69821
   0  10  -3    0.26    8.34 110-0.65160 0.66024 0.55014 0.80460-0.55259 0.38984
   1   2   0  139.29    4.45 111-0.64787 0.83132 0.55760-0.25896-0.54629 0.64126
   1   9  -3   19.78   10.28 111-0.64748 0.79854 0.55837 0.66826-0.54563 0.41328
   2   6  -2   14.76    6.10 110-0.65003 0.95912 0.55329 0.28451-0.54994 0.52833
   2   8  -4  -10.99    8.08 111-0.64626 0.90133 0.56077 0.51395-0.54358 0.31075
  -7  10   1   82.45    6.10 112-0.63898-0.28514 0.57480 0.75318-0.53136 0.52321
  -6   7   4    4.98    8.65 111-0.64216-0.03614 0.56876 0.41019-0.53664 0.89224
  -3   3   4  102.71    4.99 112-0.64305 0.37928 0.56704-0.10771-0.53813 0.96199
  -3   5   4   41.83    8.87 112-0.64009 0.40365 0.57269 0.16703-0.53321 0.99643
  -3  11  -1  -10.70    7.41 112-0.64386 0.28556 0.56549 0.92852-0.53947 0.50013
  -3  12  -5  -10.41    3.94 112-0.64269 0.13318 0.56775 0.98484-0.53752 0.00799
  -3  12  -4   -8.98    5.40 113-0.63558 0.15955 0.58115 0.99644-0.52575 0.12702
  -2   8   2   60.73   10.91 111-0.64263 0.52108 0.56786 0.57187-0.53742 0.86592
  -2  10   0   11.90    9.50 112-0.64122 0.46116 0.57056 0.81420-0.53507 0.65324
  -1   1   2  827.16    3.76 112-0.63998 0.58098 0.57292-0.40450-0.53301 0.75986
  -1  10  -1    8.16   11.32 112-0.63944 0.57450 0.57393 0.80735-0.53212 0.57401
  -1  11  -3   18.57    9.04 112-0.63820 0.50308 0.57627 0.90466-0.53007 0.33845
   0   8   0    8.29    9.55 111-0.64334 0.75005 0.56649 0.56544-0.53860 0.71506
   0   9  -1    9.30    9.68 112-0.64194 0.71972 0.56918 0.68363-0.53627 0.60665
   1   6   0   61.44    7.62 112-0.64062 0.87684 0.57169 0.28920-0.53409 0.71767
   1  10  -7    8.24    6.04 113-0.63248 0.63349 0.58683 0.70830-0.52067-0.10282
   1  10  -6   12.25    6.83 112-0.63951 0.67956 0.57381 0.73621-0.53223 0.03772
   3   6  -5    7.65    4.82 111-0.64211 0.97854 0.56886 0.22205-0.53655 0.18569
  -7   7   4   -4.71    7.94 114-0.62831-0.20656 0.59499 0.37577-0.51382 0.82094
  -5   1   4  165.35    1.63 116-0.60737 0.00504 0.63047-0.48388-0.48034 0.75988
  -5   7   4   -2.80    8.15 113-0.63640 0.11531 0.58027 0.41656-0.52706 0.93760
  -5  11   0   13.57    6.10 112-0.63582-0.00049 0.58135 0.90012-0.52610 0.51347
  -5  12  -3    0.31    3.88 114-0.62860-0.12068 0.59449 0.97541-0.51428 0.14036
  -4  12  -3    3.08    4.41 113-0.63486 0.04313 0.58312 0.99652-0.52452 0.20138
  -3   9   2    5.34   10.19 113-0.63455 0.36673 0.58370 0.68345-0.52401 0.82261
  -3  10   1   -6.09   11.18 113-0.63097 0.33510 0.59022 0.79952-0.51816 0.71205
   0   7   1  138.99   12.91 113-0.63185 0.76481 0.58864 0.41880-0.51958 0.79966
   0  11  -6    7.80    5.90 113-0.63052 0.52571 0.59104 0.84307-0.51741-0.00661
   1   0  -2  620.40    1.70 114-0.62615 0.70297 0.59882-0.62141-0.51032 0.30482
   1  10  -5   14.26    8.03 114-0.62986 0.71311 0.59221 0.74119-0.51635 0.14871
   3   4  -4   26.06    3.23 113-0.63028 0.98684 0.59146-0.05937-0.51703 0.24924
   3   5  -4   18.98    4.65 114-0.62678 0.99793 0.59771 0.07452-0.51134 0.26412
  -8   9   2    4.21    5.44 115-0.61850-0.43240 0.61219 0.58529-0.49770 0.54477
  -6  11   0   10.45    5.00 113-0.62905-0.16397 0.59380 0.87416-0.51472 0.45107
  -4  11   0   41.82    7.12 113-0.63016 0.15163 0.59181 0.90345-0.51653 0.55783
  -3   8   3   19.86   12.22 114-0.62283 0.38352 0.60476 0.54226-0.50465 0.91074
  -3  12  -3    4.44    5.71 114-0.62350 0.18804 0.60359 0.99391-0.50573 0.23408
  -2  12  -5   10.03    5.16 113-0.62755 0.26538 0.59648 0.96789-0.51228 0.03677
   0  10  -2   25.45   10.63 114-0.62533 0.67495 0.60040 0.77620-0.50868 0.47344
   0  11  -7   -5.96    5.10 115-0.61942 0.47372 0.61061 0.80810-0.49918-0.15513
   0  11  -5  -29.27    7.14 114-0.62464 0.56645 0.60161 0.85181-0.50757 0.10950
   1   8  -1    3.62   10.62 115-0.62187 0.84546 0.60642 0.52340-0.50310 0.60451
   2   4  -1  554.57    6.80 114-0.62424 0.94919 0.60231-0.02620-0.50692 0.56846
   2   9  -7  -10.68    5.43 115-0.62072 0.76486 0.60840 0.54920-0.50125-0.09407
   2   9  -6   -7.95    6.27 114-0.62574 0.80646 0.59968 0.58140-0.50934 0.04301
  -8   8   3   -3.67    5.28 116-0.61289-0.41133 0.62156 0.45711-0.48821 0.64486
  -6   4   5    7.77    5.49 116-0.60730-0.07156 0.63065-0.05232-0.47940 0.90488
  -6   9   3  -11.90    8.68 116-0.61279-0.08348 0.62171 0.62913-0.48806 0.76965
  -5   9   3    1.30    9.95 115-0.61713 0.07881 0.61447 0.64519-0.49496 0.82221
  -5  10   2    6.31    9.42 115-0.61523 0.04840 0.61767 0.76537-0.49192 0.71485
  -5  12  -2    9.00    4.21 115-0.61787-0.08839 0.61324 0.96969-0.49613 0.25057
  -4   7   4   42.22    8.97 115-0.62093 0.25437 0.60802 0.40394-0.50103 0.96355
  -4  12  -2    7.59    5.36 115-0.61760 0.06725 0.61368 0.98587-0.49571 0.30110
  -3   2   4  401.60    4.69 115-0.61467 0.33838 0.61860-0.29905-0.49103 0.89346
  -3   6   4   15.15    8.27 114-0.62063 0.39678 0.60854 0.27505-0.50054 0.98970
  -2   7   3   43.22    9.87 114-0.62126 0.52606 0.60745 0.41323-0.50156 0.93661
  -2  11  -1   25.22    7.99 115-0.62077 0.41183 0.60830 0.89865-0.50077 0.51387
  -2  12  -4    6.41    5.56 115-0.61861 0.29783 0.61198 0.97544-0.49732 0.14895
  -1   4   3  184.44    7.04 115-0.61976 0.64121 0.61003 0.00056-0.49915 0.91800
  -1  11  -2   55.70    9.78 115-0.61462 0.52039 0.61869 0.88263-0.49095 0.42906
   0   1   1  186.07    2.63 114-0.62292 0.68066 0.60459-0.44087-0.50422 0.65368
   0   4   2   22.75    6.91 115-0.62124 0.75736 0.60749-0.00198-0.50153 0.84521
   0   5   2  -16.55    9.73 116-0.61279 0.76467 0.62171 0.12737-0.48806 0.85730
   1   9  -2   60.32   10.76 115-0.61884 0.81088 0.61158 0.63339-0.49769 0.49195
   1  10  -4  147.26    8.70 115-0.61796 0.73983 0.61308 0.73500-0.49627 0.25908
   2   5  -1   37.00    6.01 114-0.62060 0.95666 0.60859 0.10684-0.50049 0.58556
   2   7  -2  263.35    7.38 114-0.62130 0.94270 0.60739 0.37110-0.50162 0.50525
   2   8  -3   93.87    9.08 115-0.61983 0.91198 0.60990 0.48999-0.49927 0.39587
   2   9  -5    9.12    7.10 115-0.61571 0.83865 0.61687 0.58455-0.49269 0.15443
   3   7  -7   38.50    3.96 116-0.60820 0.87821 0.62921 0.26652-0.48080-0.10433
   3   7  -6    2.01    4.48 116-0.60953 0.92440 0.62705 0.28862-0.48290 0.02372
  -6   5   5   14.56    6.25 116-0.60739-0.05743 0.63032 0.08904-0.47971 0.92481
  -6  10   2    0.62    6.25 116-0.61276-0.11060 0.62157 0.74647-0.48818 0.65996
  -5   4   5   -8.53    5.83 116-0.60927 0.08780 0.62728-0.03087-0.48267 0.95656
  -5   5   5   12.03    7.18 116-0.60855 0.10089 0.62844 0.10388-0.48154 0.97301
  -3  11   0   -4.27    7.16 116-0.61338 0.29548 0.62053 0.89273-0.48918 0.57747
  -1   3   3    3.74    5.87 115-0.61276 0.61913 0.62157-0.15350-0.48818 0.88320
  -1   5   3    7.30    8.02 115-0.61305 0.64710 0.62107 0.13084-0.48865 0.93072
  -1   9   1    3.73   12.59 115-0.61276 0.61367 0.62157 0.65127-0.48818 0.75917
   0   3   2   11.12    5.87 115-0.61254 0.73493 0.62193-0.15814-0.48784 0.80894
   0  11  -4   11.51    6.79 115-0.61335 0.59185 0.62058 0.85396-0.48912 0.22081
   1   7   0   23.99    8.77 115-0.61446 0.86181 0.61874 0.38545-0.49089 0.69745
   2   3  -1   82.52    4.96 116-0.60769 0.91884 0.62982-0.19584-0.48019 0.52114
   3   6  -4   56.44    5.19 116-0.60944 0.99249 0.62699 0.18625-0.48295 0.26131
  -7   9   3  -12.59    6.54 117-0.60120-0.24714 0.64030 0.59699-0.46986 0.69380
  -6   8   4   -5.88    8.25 117-0.60295-0.06312 0.63755 0.48595-0.47260 0.85439
  -5   3   5  109.40    4.95 118-0.59485 0.06220 0.65010-0.19833-0.46001 0.90981
  -5   8   4    0.86    9.69 116-0.60478 0.09528 0.63466 0.49950-0.47545 0.90366
  -5  11   1   15.62    7.01 117-0.59962 0.00394 0.64277 0.85937-0.46740 0.58383
  -4   9   3    7.76    9.07 117-0.60478 0.22302 0.63466 0.64038-0.47545 0.85414
  -4  10   2  -10.71    8.07 117-0.60588 0.20033 0.63291 0.76643-0.47718 0.74940
  -3  12  -2    4.82    5.39 117-0.60478 0.21125 0.63466 0.98106-0.47545 0.33259
  -2   1   3 7198.78    6.95 117-0.60256 0.42891 0.63818-0.46572-0.47198 0.77568
  -2   9   2   56.24   10.32 117-0.60326 0.49331 0.63706 0.64298-0.47308 0.82658
  -2  10   1   25.33    9.38 117-0.60347 0.46361 0.63674 0.76602-0.47340 0.71831
  -2  12  -3    2.68    5.35 116-0.60478 0.32573 0.63466 0.97114-0.47545 0.25509
  -1   8   2   -8.29   13.20 116-0.60478 0.63269 0.63466 0.51446-0.47545 0.84902
  -1  10   0  -19.74   10.10 117-0.60499 0.58508 0.63432 0.76332-0.47579 0.64401
   0   9   0   45.23   10.16 116-0.60459 0.72042 0.63496 0.63590-0.47516 0.67486
   1   4   1  103.20    6.48 117-0.60283 0.85343 0.63774-0.03759-0.47241 0.73872
   1   5   1   22.77    9.11 117-0.59906 0.86344 0.64363 0.09802-0.46653 0.75561
   2   6  -1  175.35    6.93 117-0.60398 0.95325 0.63593 0.22152-0.47420 0.58107
   2   9  -4    4.18    8.46 117-0.60155 0.86194 0.63976 0.57703-0.47040 0.25890
   3   7  -5    1.10    4.80 117-0.60149 0.95547 0.63984 0.29444-0.47032 0.13920
  -7   5   5    2.76    5.31 118-0.59352-0.22510 0.65176 0.05116-0.45848 0.84666
  -7  10   2    1.16    5.31 118-0.59388-0.28609 0.65122 0.70164-0.45904 0.57912
  -6   6   5   14.27    7.25 118-0.59197-0.05937 0.65410 0.20621-0.45609 0.92161
  -6  11   1   -2.68    5.42 118-0.59228-0.15409 0.65363 0.83906-0.45657 0.51836
  -5   0   3    1.24    1.10 121-0.56657-0.09094 0.69031-0.70471-0.41753 0.54708
  -5   6   5   -4.17    8.74 118-0.59063 0.09575 0.65612 0.21828-0.45402 0.96951
  -5  12  -1   -5.44    4.63 119-0.58779-0.07842 0.66034 0.95249-0.44965 0.33390
  -4   1   4  481.12    2.47 120-0.57542 0.12965 0.67814-0.51573-0.43083 0.76088
  -4   4   5    2.69    6.72 117-0.59523 0.23032 0.64916-0.04461-0.46112 0.97649
  -4  11   1    8.32    8.21 118-0.59326 0.15462 0.65216 0.86419-0.45807 0.62403
  -4  12  -1    3.22    5.46 117-0.59480 0.08671 0.64982 0.96560-0.46046 0.39285
  -3   7   4    5.77    8.89 118-0.59471 0.38407 0.64997 0.37521-0.46031 0.97198
  -2   4   4  -23.20    6.57 118-0.59662 0.50313 0.64704-0.03010-0.46327 0.96059
  -2   5   4   92.93    9.48 118-0.59455 0.51415 0.65021 0.10539-0.46006 0.97648
  -1  12  -5    1.20    5.02 117-0.59627 0.38942 0.64758 0.92825-0.46272 0.03861
   0   8   1   16.25   10.02 118-0.59627 0.74436 0.64758 0.50350-0.46272 0.77087
   0  10  -1   28.87   11.01 118-0.59196 0.68384 0.65412 0.74302-0.45607 0.55055
   0  11  -3   29.13    8.97 118-0.59193 0.61338 0.65416 0.84334-0.45603 0.31564
   1  10  -3    6.50    9.08 117-0.59437 0.75853 0.65047 0.71919-0.45979 0.34809
   3   3  -4   -3.78    2.02 120-0.57611 0.91886 0.67716-0.28899-0.43188 0.14009
   3   5  -3  107.74    5.77 119-0.58520 0.99769 0.66414 0.02696-0.44569 0.32970
  -7   8   4    7.86    6.49 119-0.58418-0.24011 0.66543 0.44533-0.44414 0.77749
  -4   5   5   31.30    6.56 119-0.58750 0.23732 0.66057 0.08742-0.44922 0.99385
  -4   8   4   -1.24    9.04 119-0.58715 0.23351 0.66108 0.49142-0.44869 0.93227
  -3   9   3  -13.21   11.38 119-0.58222 0.35666 0.66827 0.61990-0.44116 0.86963
  -3  10   2   61.53    8.99 119-0.58671 0.33186 0.66172 0.74685-0.44802 0.77071
  -2   3   4  303.26    7.03 119-0.58480 0.47811 0.66452-0.18898-0.44509 0.91910
  -2   8   3   -2.66   10.21 119-0.58797 0.50898 0.65987 0.50190-0.44994 0.90688
  -2  11   0    1.51    7.70 119-0.58631 0.41920 0.66231 0.86411-0.44741 0.58829
  -2  12  -2  -17.82    6.82 119-0.58285 0.35228 0.66736 0.95666-0.44211 0.34612
  -1  11  -1    5.56    9.71 119-0.58450 0.53193 0.66497 0.85535-0.44462 0.50840
  -1  12  -4  -13.49    5.87 119-0.58336 0.42708 0.66662 0.93268-0.44289 0.14280
   1   3   1  131.28    5.76 119-0.58696 0.82521 0.66136-0.20218-0.44840 0.69226
   1   6   1   -1.80   10.42 119-0.58223 0.86218 0.66826 0.21726-0.44117 0.75436
   1   9  -1   -0.59   11.05 119-0.58179 0.81524 0.66889 0.59787-0.44050 0.56175
   2   8  -2   11.15    9.56 120-0.58047 0.92065 0.67079 0.45393-0.43848 0.46330
   3   4  -3   95.57    4.40 120-0.57747 0.97618 0.67505-0.12484-0.43395 0.29460
   3   7  -4  -10.74    6.98 120-0.57908 0.97569 0.67277 0.27653-0.43638 0.23202
  -7   6   5    1.73    6.43 119-0.57777-0.22796 0.67455 0.16917-0.43441 0.84520
  -4   3   5   16.78    5.88 120-0.57316 0.19486 0.68101-0.21624-0.42745 0.92619
  -4   6   5   64.45    9.33 120-0.57382 0.23594 0.68010 0.20921-0.42845 0.99404
  -3  11   1  -20.81    8.99 121-0.57013 0.28883 0.68521 0.85403-0.42288 0.64453
  -3  12  -1   10.31    5.58 119-0.57938 0.22769 0.67225 0.95983-0.43687 0.42126
  -2   6   4   58.94    8.85 120-0.57878 0.51397 0.67311 0.22422-0.43595 0.97590
  -1   2   3  199.31    5.88 120-0.57412 0.56959 0.67967-0.35111-0.42890 0.80358
   1   8   0   -3.11    9.56 120-0.57964 0.84447 0.67188 0.47099-0.43727 0.66373
   2   7  -1   72.26    7.64 120-0.57779 0.94043 0.67451 0.32241-0.43446 0.56442
   3   6  -3   20.99    6.03 121-0.57169 0.99837 0.68305 0.14979-0.42524 0.32829
  -6   7   5   -3.63    7.71 122-0.56123-0.07797 0.69726 0.30640-0.40965 0.90107
  -5   7   5  -13.95    9.37 121-0.56540 0.08589 0.69168 0.32485-0.41588 0.95302
  -5  10   3   10.47    8.39 120-0.56856 0.04390 0.68741 0.70762-0.42060 0.76535
  -1   7   3    9.14   10.97 120-0.57321 0.63328 0.68100 0.35357-0.42760 0.91325
  -1  12  -3   -9.24    6.52 121-0.56618 0.44802 0.69063 0.93180-0.41704 0.24665
   0   2   2  138.99    5.13 120-0.57263 0.68370 0.68180-0.35667-0.42674 0.72668
   0  11  -2   49.65    9.27 121-0.56579 0.62880 0.69116 0.82468-0.41646 0.40629
   1  10  -2  -11.98    9.89 121-0.56559 0.77328 0.69142 0.69414-0.41617 0.43106
   2   1  -4   18.91    1.32 122-0.55942 0.72233 0.69965-0.60749-0.40696 0.02023
   2   9  -3   21.93    7.51 121-0.57062 0.87822 0.68458 0.55800-0.42370 0.34110
   3   8  -6   -4.74    5.23 120-0.56727 0.88824 0.68916 0.36242-0.41867-0.01703
  -6   9   4  -11.10    7.55 122-0.55589-0.09517 0.70398 0.55901-0.40184 0.80583
  -6  10   3   -4.91    5.68 122-0.56075-0.11831 0.69761 0.68880-0.40906 0.70772
  -5   9   4   22.68    9.05 122-0.55481 0.05785 0.70538 0.57575-0.40024 0.85748
  -5  12   0   -3.92    3.99 121-0.56182-0.06061 0.69620 0.92705-0.41064 0.42151
  -4  12   0    6.57    4.74 121-0.56111 0.09485 0.69714 0.93918-0.40959 0.47056
  -3   8   4   44.40    9.99 122-0.56104 0.36438 0.69724 0.46868-0.40948 0.94447
  -2   7   4  -15.93   11.69 122-0.55614 0.50351 0.70366 0.33305-0.40221 0.96353
  -1   9   2    9.67   10.40 121-0.56082 0.60518 0.69751 0.59811-0.40916 0.81002
  -1  10   1    4.44   10.00 121-0.56178 0.57872 0.69625 0.72203-0.41058 0.70721
   0   9   1   10.39   12.38 123-0.55365 0.71715 0.70687 0.59033-0.39853 0.72815
   1   0  -3   46.50    1.39 122-0.55407 0.58928 0.70633-0.74892-0.39916 0.06609
   1   7   1   24.96    9.19 122-0.56086 0.85088 0.69747 0.32651-0.40921 0.74166
   1  11  -6    8.36    4.86 121-0.56111 0.61351 0.69714 0.75200-0.40959-0.05950
   1  11  -5    1.39    5.92 121-0.56069 0.65417 0.69769 0.77068-0.40896 0.06482
   2   4   0  136.77    7.32 122-0.55459 0.91997 0.70566-0.11100-0.39991 0.59089
   2   5   0  167.75    6.86 122-0.55955 0.93814 0.69919 0.03658-0.40727 0.61908
   3   8  -5   20.46    6.35 122-0.55358 0.92253 0.70696 0.37068-0.39843 0.09237
  -7   7   5  -28.45    6.55 124-0.54272-0.25026 0.72052 0.27032-0.38233 0.82058
  -6  11   2   -0.13    5.12 123-0.54627-0.16220 0.71612 0.78931-0.38752 0.58034
  -5  11   2    4.60    5.72 122-0.55357 0.00091 0.70686 0.81472-0.39827 0.64252
  -4   7   5   15.10   10.40 124-0.54547 0.22027 0.71712 0.31622-0.38635 0.97999
  -4  10   3    3.28    8.05 122-0.55413 0.18588 0.70614 0.70881-0.39909 0.79959
  -4  11   2  -17.31    7.80 123-0.54703 0.15364 0.71517 0.82097-0.38864 0.68245
  -3   4   5   30.64    6.07 123-0.55173 0.34457 0.70923-0.08798-0.39555 0.96927
  -3   5   5   -3.78    7.26 122-0.55344 0.35805 0.70703 0.05547-0.39807 0.99400
  -2   9   3   -1.22   12.16 123-0.54719 0.47804 0.71496 0.58839-0.38888 0.86892
  -2  10   2    0.56    8.88 123-0.55188 0.45596 0.70904 0.71881-0.39576 0.77287
  -2  12  -1   -8.14    5.88 123-0.55203 0.35964 0.70884 0.93797-0.39599 0.43163
  -1  11   0   -6.00    9.75 123-0.54664 0.53600 0.71565 0.82446-0.38807 0.57992
   0  10   0   -4.44    9.10 123-0.55266 0.68800 0.70803 0.70553-0.39692 0.61813
   1  11  -4    6.81    7.19 123-0.54896 0.68415 0.71273 0.77537-0.39148 0.17449
   2   6   0   31.56    9.29 123-0.54882 0.94057 0.71292 0.16456-0.39126 0.62482
   2  10  -6    2.37    5.04 124-0.54485 0.74388 0.71789 0.60842-0.38544-0.05815
   2  10  -5   14.66    6.52 122-0.54990 0.78604 0.71156 0.62976-0.39285 0.07717
   3   7  -3   -6.05    6.88 123-0.54743 0.98588 0.71466 0.25632-0.38923 0.31235
   3   8  -7   -0.48    4.13 126-0.52453 0.81363 0.74217 0.29635-0.35599-0.21234
  -8   8   4    1.29    4.78 124-0.53988-0.43825 0.72400 0.36910-0.37797 0.65897
  -7  10   3   12.35    4.84 124-0.53571-0.30105 0.72905 0.64193-0.37191 0.62079
  -4   9   4   12.16    8.58 124-0.54346 0.20348 0.71961 0.57493-0.38319 0.89055
  -3   6   5   24.06    8.28 124-0.54186 0.36081 0.72158 0.18211-0.38086 0.99893
  -3  12   0   -0.17    5.42 124-0.54348 0.23682 0.71958 0.93411-0.38322 0.49622
  -2   2   4  883.61    6.10 124-0.53888 0.41871 0.72522-0.39010-0.37651 0.83051
  -2  11   1    3.45    7.83 123-0.54400 0.41881 0.71895 0.82718-0.38397 0.65320
  -1   8   3    2.64   10.75 124-0.54173 0.61694 0.72175 0.45158-0.38066 0.88786
  -1  12  -2   -1.97    5.71 124-0.54266 0.46583 0.72060 0.92070-0.38202 0.34044
   0   4   3   20.68    9.07 123-0.54196 0.71535 0.72146-0.09953-0.38100 0.84681
   0   5   3   18.32    8.70 124-0.54141 0.73150 0.72214 0.04435-0.38019 0.87289
   0   8   2   -3.74   10.84 124-0.54286 0.73305 0.72036 0.44869-0.38231 0.81367
   0  12  -5    5.06    4.88 124-0.53647 0.48834 0.72814 0.86850-0.37300-0.00009
   1   9   0   42.23   11.76 124-0.53769 0.81351 0.72666 0.55961-0.37478 0.62513
   2   2  -1    6.35    3.41 124-0.53453 0.83226 0.73045-0.43830-0.37020 0.38816
   2   8  -1  124.20    8.46 123-0.54277 0.91903 0.72047 0.41786-0.38218 0.53740
   2   9  -2   53.68    9.91 124-0.53952 0.88663 0.72444 0.53566-0.37745 0.42446
   2  10  -4  -13.89    7.21 124-0.53656 0.81594 0.72802 0.62904-0.37314 0.18307
   3   5  -2   -9.65    5.86 124-0.53850 0.99087 0.72568-0.01465-0.37596 0.38331
   3   8  -4   10.51    6.64 124-0.53848 0.94650 0.72571 0.36874-0.37593 0.19418
  -7   9   4    2.36    5.27 125-0.53180-0.27650 0.73337 0.51652-0.36633 0.72148
  -6   8   5   -9.22    7.90 125-0.52732-0.09410 0.73863 0.40562-0.35987 0.87003
  -5   8   5    2.76    8.80 124-0.53098 0.06342 0.73434 0.42075-0.36514 0.92350
  -3   3   5   84.56    6.04 125-0.52853 0.30781 0.73722-0.25587-0.36160 0.91425
  -3  10   3   10.71    8.39 124-0.53284 0.32083 0.73214 0.69525-0.36783 0.81803
  -1   4   4  -31.41    8.63 125-0.52861 0.59329 0.73712-0.10632-0.36172 0.91077
  -1   5   4  280.90    8.81 124-0.53322 0.60853 0.73169 0.04170-0.36839 0.93907
   0  11  -1  -26.41    7.77 125-0.53245 0.64194 0.73260 0.79971-0.36727 0.48091
   0  12  -4    5.22    5.41 124-0.53202 0.52487 0.73311 0.88080-0.36665 0.12185
   1   2   1   24.06    4.69 124-0.53284 0.75636 0.73214-0.41591-0.36783 0.59040
   1   5   2   -0.89   10.18 125-0.52866 0.83404 0.73706 0.02454-0.36180 0.77824
   1   8   1  139.42   12.43 125-0.52869 0.83213 0.73702 0.42593-0.36185 0.71783
   1  10  -1   20.31   10.28 125-0.52645 0.77639 0.73963 0.67173-0.35862 0.50452
   1  11  -3   -2.56    7.75 125-0.52749 0.70812 0.73842 0.76759-0.36012 0.26978
   2   7   0  112.07   10.29 125-0.52591 0.93182 0.74026 0.27742-0.35784 0.61569
   3   3  -3    9.25    2.97 126-0.51864 0.90215 0.74855-0.34089-0.34743 0.18429
   3   6  -2   16.95    7.00 125-0.53077 0.99700 0.73459 0.11824-0.36484 0.39506
  -5  12   1   -5.26    4.60 127-0.51345-0.06814 0.75440 0.89653-0.33987 0.48245
  -4  12   1  -11.43    5.35 125-0.52329 0.09954 0.74334 0.90688-0.35392 0.54124
  -3   7   5    5.33   11.12 126-0.51954 0.35076 0.74761 0.29769-0.34855 0.98916
  -3   9   4  -35.71   11.17 126-0.51861 0.33824 0.74865 0.56067-0.34722 0.90513
  -3  11   2    5.90    7.25 125-0.52567 0.28612 0.74061 0.81091-0.35733 0.70420
  -2   8   4   -0.31   10.25 125-0.52329 0.48256 0.74334 0.43807-0.35392 0.93949
  -1   6   4   23.93    9.85 125-0.52321 0.61518 0.74344 0.16846-0.35380 0.94521
   1   1   0   85.09    2.70 126-0.51923 0.69124 0.74795-0.58977-0.34811 0.42155
   1   4   2   -4.43    7.17 126-0.52312 0.81524 0.74354-0.12337-0.35367 0.74803
   1   6   2   93.90   12.12 126-0.52009 0.83661 0.74698 0.15425-0.34934 0.78940
   2   3   0    0.07    4.88 126-0.52363 0.87635 0.74295-0.28996-0.35441 0.52130
   3   4  -2   40.74    4.82 126-0.52097 0.96145 0.74598-0.17599-0.35060 0.33735
  -4   2   5  349.45    4.10 127-0.50539 0.11406 0.76310-0.43904-0.32836 0.80917
  -4   8   5    0.36    8.44 127-0.51344 0.20209 0.75435 0.41891-0.33976 0.95378
  -2  12   0   -1.73    5.63 127-0.51416 0.36502 0.75356 0.91416-0.34078 0.50493
  -1  10   2  -20.32   10.80 127-0.50945 0.56905 0.75872 0.68034-0.33410 0.76018
  -1  12  -1  -25.28    6.85 127-0.50920 0.47644 0.75899 0.90429-0.33375 0.42001
   0   3   3   -9.33    6.39 126-0.51443 0.67863 0.75326-0.26913-0.34117 0.79063
   0  12  -3   14.95    5.92 127-0.51095 0.54728 0.75708 0.88198-0.33624 0.21956
   2  10  -3    5.13    8.15 127-0.51132 0.83230 0.75668 0.62613-0.33676 0.27683
   3   7  -2  226.58    8.16 127-0.50847 0.98860 0.75979 0.23354-0.33271 0.38744
   3   8  -3   10.24    7.82 127-0.50790 0.96107 0.76040 0.35629-0.33190 0.27894
  -7   8   5    0.38    5.44 128-0.50012-0.27988 0.76854 0.35958-0.32107 0.78184
  -6   5   6    3.45    6.18 129-0.49258-0.13011 0.77636-0.03756-0.31050 0.88377
  -5   5   6    4.02    6.88 128-0.49900 0.03240 0.76972-0.01574-0.31949 0.94490
  -5   6   6    7.43    7.92 129-0.49363 0.04063 0.77528 0.11981-0.31197 0.95824
  -5  10   4    1.85    7.49 128-0.49911 0.01801 0.76960 0.65179-0.31964 0.79852
  -5  11   3    0.04    5.84 128-0.49515-0.01520 0.77372 0.76809-0.31408 0.68780
  -3  12   1   16.84    6.05 128-0.50028 0.23164 0.76838 0.90384-0.32129 0.56417
  -2   4   5  115.17    8.54 128-0.50000 0.44753 0.76867-0.13303-0.32089 0.94468
  -2   5   5    3.82    7.81 127-0.50479 0.46618 0.76360 0.01430-0.32764 0.97622
  -2   6   5  -12.86   10.82 128-0.49880 0.47244 0.76993 0.14788-0.31920 0.98680
  -2  10   3  -11.54   10.65 129-0.49317 0.43990 0.77576 0.67318-0.31132 0.81885
  -1   3   4   71.90    6.23 127-0.50508 0.55536 0.76329-0.27406-0.32804 0.85488
  -1   7   4   14.47   10.15 127-0.50291 0.60512 0.76559 0.28908-0.32499 0.93937
  -1   9   3    7.28   11.82 129-0.49317 0.58612 0.77576 0.55129-0.31132 0.85215
  -1  11   1    1.02    9.21 129-0.49541 0.53023 0.77345 0.79527-0.31445 0.63995
   0   9   2  -14.68    9.83 128-0.50263 0.70829 0.76589 0.54349-0.32460 0.77656
   0  10   1   12.00    9.24 127-0.50576 0.68050 0.76256 0.67146-0.32901 0.67849
   1   7   2   15.22   12.43 128-0.49859 0.83259 0.77014 0.27259-0.31892 0.78063
   1  11  -2   31.03    8.71 128-0.49582 0.71856 0.77303 0.75903-0.31502 0.35603
   2   9  -1   81.98   10.64 128-0.49854 0.88911 0.77020 0.50964-0.31884 0.49499
   3   9  -5   -6.59    6.24 128-0.49382 0.87497 0.77508 0.44103-0.31223 0.02611
  -6   2   5   15.07    1.49 135-0.42571-0.28025 0.83706-0.54451-0.21936 0.59908
  -6   6   6   26.57    6.27 129-0.48756-0.12195 0.78141 0.09904-0.30355 0.89907
  -6  10   4    3.47    5.72 129-0.49062-0.14852 0.77833 0.62811-0.30781 0.73642
  -5   4   6   42.40    5.39 129-0.48652 0.00843 0.78246-0.17046-0.30209 0.90424
  -4   5   6  -11.08    8.23 130-0.48295 0.17356 0.78601-0.01730-0.29714 0.97460
  -4  10   4   11.46    8.69 129-0.48680 0.16060 0.78218 0.65637-0.30248 0.83494
  -4  11   3    6.19    7.16 130-0.48563 0.13129 0.78334 0.77708-0.30086 0.72758
  -3   8   5   35.31   10.98 129-0.48869 0.33240 0.78028 0.40473-0.30511 0.96660
  -2  11   2   34.20    7.69 128-0.49323 0.41044 0.77566 0.78959-0.31145 0.70928
  -2  13  -2   -8.24    4.14 129-0.48657 0.26473 0.78241 0.98457-0.30217 0.23433
   0  11   0    4.23    7.80 129-0.49142 0.63785 0.77751 0.77756-0.30893 0.55302
   0  12  -2   -6.99    6.45 129-0.48784 0.56883 0.78114 0.87200-0.30393 0.31227
   1   3   2  337.90    6.68 128-0.49491 0.77432 0.77394-0.29415-0.31380 0.68640
   1   9   1  137.53   11.91 129-0.48694 0.80478 0.78204 0.52328-0.30267 0.68155
   2   5   1   14.20    7.21 128-0.49308 0.91348 0.77582-0.01946-0.31125 0.65109
   2   6   1   55.47   10.12 129-0.48654 0.92153 0.78244 0.11453-0.30213 0.66551
   2   8   0   11.33    9.14 129-0.49353 0.91340 0.77535 0.38575-0.31188 0.59134
   3   5  -1   -6.22    6.90 129-0.48698 0.97799 0.78199-0.05516-0.30274 0.43637
   3   9  -6   -4.14    4.69 130-0.48322 0.82467 0.78574 0.41166-0.29751-0.11675
   3   9  -4   -1.04    7.69 130-0.47751 0.90420 0.79132 0.44833-0.28961 0.13139
  -6   9   5  -14.02    6.34 129-0.48313-0.12529 0.78596 0.49180-0.29718 0.82356
  -6  11   3    4.74    4.64 130-0.48208-0.18527 0.78699 0.74074-0.29573 0.61875
  -5   9   5   11.89    8.12 130-0.48172 0.02734 0.78734 0.51135-0.29523 0.87905
  -4   4   6   -5.05    6.42 130-0.47676 0.15571 0.79217-0.16652-0.28837 0.93741
  -4   6   6  100.20    9.30 130-0.48052 0.18435 0.78852 0.12152-0.29356 0.98911
  -3  13  -1   -1.87    3.81 130-0.48344 0.14957 0.78565 0.98837-0.29761 0.30514
  -2   7   5   -6.29   11.82 131-0.47268 0.46323 0.79608 0.26833-0.28274 0.98231
  -2   9   4   12.51    9.54 129-0.48313 0.45536 0.78596 0.53569-0.29718 0.90430
   0   8   3   21.46   13.11 129-0.48215 0.71035 0.78692 0.40156-0.29582 0.85289
   1  10   0   45.09    8.95 129-0.48476 0.77475 0.78434 0.64365-0.29944 0.57427
   2   4   1   -2.92    6.44 130-0.48087 0.88813 0.78817-0.17327-0.29406 0.61200
   2  10  -2  -16.55    8.60 130-0.47872 0.84411 0.79028 0.61292-0.29107 0.35902
   3   6  -1   36.95    6.53 129-0.48278 0.98937 0.78630 0.08502-0.29670 0.45622
   3   8  -2   80.33    8.94 130-0.47432 0.96812 0.79452 0.33965-0.28500 0.36479
  -6   7   6   25.52    7.02 131-0.46544-0.13027 0.80293 0.21944-0.27263 0.89053
  -5   7   6   -7.28    7.07 131-0.47296 0.03587 0.79587 0.24198-0.28295 0.95139
  -5  12   2   -0.18    4.12 131-0.46379-0.07573 0.80445 0.86133-0.27037 0.53907
  -4   9   5   39.78    8.98 130-0.47120 0.17414 0.79754 0.51608-0.28053 0.91440
  -4  12   2   -6.74    5.12 131-0.46696 0.08415 0.80151 0.87467-0.27471 0.59236
  -3   2   5  328.32    4.88 131-0.46452 0.22949 0.80378-0.46378-0.27137 0.80201
  -3  10   4   -2.41    8.99 132-0.46219 0.29367 0.80592 0.64877-0.26819 0.85348
  -3  11   3    5.79    7.91 131-0.46964 0.27096 0.79901 0.76975-0.27839 0.75142
  -2   3   5  111.72    7.14 131-0.46968 0.40543 0.79897-0.30337-0.27844 0.88214
  -2  12   1    8.62    6.44 131-0.46591 0.35542 0.80249 0.88956-0.27327 0.56814
  -1   8   4   49.27   10.22 130-0.47265 0.58895 0.79616 0.39843-0.28253 0.92025
  -1  12   0   34.91    6.17 130-0.47270 0.47577 0.79611 0.88339-0.28260 0.49890
   1   8   2  191.03   12.62 131-0.46917 0.81543 0.79945 0.38648-0.27775 0.76190
   2   7   1   12.53   10.88 131-0.46912 0.91671 0.79950 0.23992-0.27767 0.66277
   3   4  -1  185.70    6.05 131-0.46311 0.94404 0.80508-0.21586-0.26944 0.38304
   3   7  -1  291.62    9.21 131-0.46437 0.98504 0.80392 0.20908-0.27117 0.45343
  -4   7   6   -2.32    9.63 132-0.45986 0.17737 0.80788 0.24351-0.26501 0.98382
  -3   5   6   -0.77    9.14 133-0.45132 0.29909 0.81551-0.03150-0.25340 0.98199
  -2  13  -1   -1.52    4.15 132-0.45557 0.27502 0.81174 0.97616-0.25918 0.31931
  -1   1   3    6.57    3.53 132-0.46254 0.44439 0.80543-0.61859-0.26866 0.62401
   0   1   2 2558.03    6.00 132-0.45739 0.55560 0.81011-0.62657-0.26165 0.53937
   0   2   3   25.75    6.82 132-0.45357 0.60630 0.81352-0.47029-0.25646 0.68532
   0   5   4   45.49    9.73 131-0.46048 0.69244 0.80731-0.02004-0.26586 0.88551
   1  11  -1    8.71    7.08 131-0.46284 0.72412 0.80516 0.74397-0.26907 0.43698
   2  11  -5   -5.95    5.14 134-0.44044 0.69825 0.82490 0.66853-0.23872-0.05389
   2  11  -4   -2.74    6.13 132-0.45246 0.74386 0.81450 0.68849-0.25495 0.08966
   3   3  -2   19.25    3.51 132-0.45748 0.88399 0.81003-0.38198-0.26176 0.22634
   3   9  -3   15.88    7.49 132-0.46043 0.92428 0.80736 0.44841-0.26579 0.23563
  -3   6   6   -5.01    8.50 133-0.44974 0.31009 0.81677 0.10781-0.25152 0.99865
  -3   9   5   -0.18   10.09 133-0.44286 0.30236 0.82271 0.50750-0.24224 0.93069
  -3  12   2   -2.22    5.66 133-0.44439 0.21904 0.82140 0.87472-0.24430 0.61614
  -3  13   0    4.72    3.75 133-0.44370 0.14783 0.82200 0.97310-0.24337 0.38021
  -2   8   5   19.60   11.46 133-0.44445 0.44757 0.82135 0.38375-0.24438 0.96311
  -1   2   4    9.91    6.50 133-0.44673 0.48317 0.81938-0.47101-0.24746 0.75171
  -1   5   5   73.40   10.75 133-0.44356 0.56342 0.82212-0.02974-0.24318 0.94280
  -1  10   3   20.07    8.39 132-0.45011 0.55118 0.81645 0.64145-0.25202 0.80564
  -1  11   2   59.30    9.13 133-0.44842 0.52089 0.81792 0.75932-0.24973 0.69969
   0   4   4    6.83    9.77 133-0.44569 0.66683 0.82029-0.17360-0.24605 0.84839
   0  10   2  154.40    9.32 132-0.45112 0.66747 0.81556 0.63748-0.25339 0.73166
   0  12  -1   -8.83    5.44 133-0.45121 0.57128 0.81548 0.86344-0.25351 0.39418
   1   5   3  199.46    9.92 132-0.45170 0.79982 0.81504-0.03307-0.25418 0.79927
   1  12  -4   -1.77    4.76 134-0.44033 0.59440 0.82487 0.81365-0.23882 0.04646
   2   9   0   24.14    8.92 132-0.45169 0.88450 0.81505 0.48669-0.25417 0.55637
  -5   8   6  106.47    8.36 134-0.43900 0.00873 0.82610 0.35046-0.23685 0.92477
  -4   3   6    2.78    5.78 133-0.44051 0.10529 0.82483-0.33904-0.23887 0.86148
  -3   4   6  -13.24    6.17 134-0.44089 0.27623 0.82450-0.18028-0.23938 0.94276
  -2  11   3   22.12    8.01 134-0.43661 0.39380 0.82811 0.75227-0.23363 0.75711
  -1   4   5   -2.74    9.34 134-0.43264 0.53768 0.83139-0.18022-0.22832 0.90493
  -1   6   5   -4.34    9.48 134-0.44011 0.57207 0.82517 0.10901-0.23833 0.95999
  -1  13  -2   -0.76    3.93 134-0.44065 0.38128 0.82471 0.95598-0.23906 0.21796
   0   7   4   33.26   13.00 134-0.43599 0.69657 0.82862 0.24229-0.23280 0.90074
   0   9   3   82.80    9.72 133-0.43996 0.68455 0.82529 0.50426-0.23814 0.82253
   0  11   1   24.19    7.82 133-0.44318 0.63190 0.82255 0.75143-0.24247 0.61592
   1   4   3   69.42    8.01 134-0.43972 0.77273 0.82549-0.18540-0.23781 0.76121
   1  10   1   24.50   10.51 134-0.43596 0.76619 0.82864 0.61836-0.23277 0.63309
   1  12  -3   14.10    5.18 134-0.43561 0.62709 0.82894 0.82141-0.23229 0.16733
   2   2   0   19.38    4.90 134-0.43744 0.77608 0.82741-0.51574-0.23475 0.38175
   2   3   1   32.93    5.86 133-0.44081 0.83487 0.82457-0.35146-0.23927 0.53607
   2   8   1   24.01    9.66 133-0.44007 0.90076 0.82520 0.35504-0.23828 0.64565
   2  10  -1   10.46    7.53 133-0.44186 0.84683 0.82368 0.59964-0.24068 0.43770
   2  11  -3  -15.72    6.53 134-0.43447 0.77252 0.82988 0.68735-0.23076 0.19020
   3   8  -1   -2.20    9.67 134-0.43373 0.96767 0.83049 0.32434-0.22978 0.43298
  -6   8   6   82.75    6.31 135-0.42816-0.15824 0.83510 0.32636-0.22233 0.85963
  -5  11   4    1.46    5.11 134-0.42921-0.03807 0.83425 0.72189-0.22374 0.72103
  -4   8   6   22.36    9.17 135-0.42802 0.15874 0.83522 0.35708-0.22214 0.96263
  -3   7   6   25.48    8.78 135-0.43062 0.30513 0.83311 0.23367-0.22561 0.99669
  -2  10   4   -2.85    7.94 135-0.42971 0.42182 0.83385 0.63176-0.22439 0.85443
  -1   7   5   33.40   12.39 135-0.42189 0.56828 0.84012 0.23607-0.21398 0.95996
  -1   9   4   32.15    9.72 134-0.43235 0.56289 0.83169 0.50570-0.22792 0.88797
  -1  12   1   41.08    6.51 135-0.42327 0.46838 0.83903 0.86113-0.21582 0.56395
   1   2   2   36.68    5.81 135-0.42775 0.69402 0.83543-0.49795-0.22179 0.57083
   1   7   3   43.83   10.48 135-0.43068 0.80641 0.83305 0.23008-0.22570 0.81711
   1   9   2   -3.53    9.63 134-0.42953 0.78892 0.83400 0.49279-0.22415 0.73057
   2   5   2   54.42   10.19 135-0.42352 0.88407 0.83883-0.06258-0.21616 0.68502
   3   5   0    9.12    7.85 135-0.42691 0.96165 0.83611-0.08709-0.22066 0.48550
   3   6   0   34.38    7.47 135-0.42865 0.97706 0.83471 0.05599-0.22298 0.51023
   3   9  -2   63.60    8.47 134-0.42922 0.93472 0.83425 0.44102-0.22374 0.32536
   4   6  -4  -14.77    4.78 136-0.41283 0.95116 0.84718-0.02559-0.20199 0.02699
  -5  10   5   16.48    5.23 136-0.41822-0.02149 0.84288 0.59863-0.20917 0.81685
  -4  10   5   -5.59    7.54 135-0.41822 0.13441 0.84289 0.60655-0.20916 0.86120
  -4  11   4    1.41    5.14 136-0.41799 0.10595 0.84307 0.73443-0.20885 0.76226
  -2   1   4   21.94    3.71 136-0.41252 0.28262 0.84729-0.65512-0.20162 0.63382
  -2  12   2    3.35    5.76 135-0.41656 0.34674 0.84418 0.85998-0.20696 0.62656
  -2  13   0   -0.49    3.91 136-0.41426 0.27496 0.84596 0.96332-0.20392 0.39199
   0   3   4  -19.23    8.50 136-0.41322 0.62125 0.84676-0.34236-0.20254 0.78054
   0  12   0    1.24    6.59 136-0.40992 0.57088 0.84928 0.84890-0.19819 0.46655
   1  11   0   17.83    7.27 136-0.41825 0.72222 0.84286 0.72772-0.20920 0.50598
   1  12  -2    3.75    5.63 136-0.40911 0.64311 0.84989 0.82151-0.19713 0.26063
   2   6   2    9.08    9.10 135-0.42124 0.89700 0.84052 0.07554-0.21316 0.70489
   3   7   0   65.75   10.20 136-0.41266 0.97625 0.84719 0.18667-0.20181 0.51243
   3  10  -5    6.20    5.06 136-0.40973 0.80487 0.84942 0.50780-0.19794-0.06211
   3  10  -4  -21.38    6.19 137-0.40741 0.84626 0.85117 0.52205-0.19489 0.05645
   4   6  -5    8.73    3.09 137-0.40119 0.89957 0.85579-0.04982-0.18672-0.11346
   4   7  -4   92.91    5.32 137-0.40340 0.95623 0.85416 0.11406-0.18961 0.04114
  -6  10   5   -6.68    4.82 137-0.40162-0.19224 0.85529 0.57468-0.18721 0.74435
  -4  12   3    4.60    4.51 136-0.40624 0.06658 0.85187 0.83958-0.19327 0.63759
  -3   3   6   57.35    6.40 137-0.40158 0.22332 0.85532-0.35429-0.18716 0.86648
  -3   8   6  -27.73    9.97 137-0.40112 0.29172 0.85567 0.35272-0.18654 0.97900
  -2   2   5  580.44    6.34 137-0.40204 0.32386 0.85499-0.49934-0.18775 0.76997
  -2   5   6   -3.20    8.11 137-0.40674 0.41098 0.85149-0.05285-0.19393 0.97166
  -2   6   6   -8.08    8.73 137-0.40625 0.42564 0.85186 0.08637-0.19328 0.99110
  -2   9   5   -6.51    8.75 137-0.40629 0.42447 0.85183 0.49062-0.19333 0.93083
  -1  13  -1   -5.07    3.86 137-0.40789 0.38728 0.85063 0.95209-0.19544 0.30619
   0   8   4   61.41   10.53 136-0.40795 0.68186 0.85059 0.35933-0.19552 0.88647
   1   3   3  559.94    9.29 137-0.40280 0.72454 0.85443-0.35379-0.18875 0.69037
   1   8   3   33.05   10.15 137-0.40382 0.79119 0.85367 0.34799-0.19009 0.80472
   2   4   2   96.85    7.57 137-0.40458 0.85464 0.85310-0.21702-0.19109 0.63736
   2   7   2    1.92    9.56 137-0.40632 0.89593 0.85180 0.20765-0.19338 0.70719
   2   9   1   -0.08   10.88 137-0.39731 0.87370 0.85844 0.46479-0.18156 0.61357
   2  11  -2   -1.75    6.89 136-0.40674 0.78286 0.85149 0.69142-0.19393 0.28598
   3   3  -1   65.47    4.97 137-0.39894 0.86750 0.85726-0.40921-0.18369 0.27712
   3   4   0  946.99    8.05 137-0.40163 0.92491 0.85529-0.24468-0.18722 0.42891
   4   6  -3   42.72    5.76 138-0.39477 0.97800 0.86027-0.01388-0.17824 0.13688
   4   7  -5   -1.49    3.54 137-0.39987 0.91045 0.85658 0.09106-0.18491-0.09049
  -5   9   6    9.62    6.95 139-0.38550-0.02657 0.86673 0.45472-0.16625 0.88205
  -3  10   5   -4.44    8.25 139-0.38370 0.25754 0.86797 0.60716-0.16392 0.87920
  -3  11   4   -0.67    5.72 137-0.39801 0.24254 0.85783 0.73298-0.18258 0.78666
  -2   4   6  -22.62    8.72 138-0.39049 0.38318 0.86323-0.20577-0.17275 0.92824
  -2   7   6   15.83   11.47 139-0.38370 0.41759 0.86797 0.21513-0.16392 0.99361
  -1   3   5  183.08    6.78 137-0.39702 0.48869 0.85855-0.34760-0.18129 0.83669
  -1   8   5   30.25    9.98 138-0.39495 0.55343 0.86005 0.35700-0.17857 0.94519
   0  10   3   13.84   10.09 138-0.39081 0.64694 0.86300 0.60754-0.17317 0.77719
   2  10   0  -11.83    7.85 138-0.39611 0.84522 0.85921 0.58223-0.18009 0.50533
   3   9  -1  -14.44    9.12 138-0.38941 0.93884 0.86399 0.42813-0.17134 0.39597
   3  10  -3    2.24    6.69 138-0.39315 0.87137 0.86134 0.53555-0.17622 0.17059
   4   5  -4   -3.78    3.13 137-0.39502 0.91695 0.86000-0.17588-0.17866-0.01559
   4   7  -3   10.63    5.90 138-0.38852 0.98182 0.86462 0.12257-0.17018 0.14798
  -6   9   6   -1.10    5.69 138-0.38111-0.18564 0.86982 0.42989-0.16065 0.81564
  -5   5   7   -5.89    7.01 140-0.37229-0.05190 0.87574-0.10110-0.14924 0.90161
  -5   6   7   17.89    6.89 139-0.37811-0.03268 0.87185 0.04412-0.15676 0.93048
  -4   9   6    9.21    8.11 139-0.37691 0.12111 0.87266 0.46571-0.15521 0.92376
  -3  12   3   -4.10    4.36 139-0.38243 0.19827 0.86891 0.84362-0.16237 0.66148
  -1  10   4   51.33    9.99 139-0.38079 0.52279 0.87003 0.60721-0.16024 0.84415
  -1  11   3   -4.22    6.41 139-0.38411 0.50526 0.86775 0.73325-0.16455 0.74039
   0  11   2   80.01    7.47 138-0.38675 0.61678 0.86593 0.72781-0.16797 0.67057
   1   1   1   11.50    3.53 139-0.38306 0.59497 0.86848-0.69170-0.16318 0.36486
   1  10   2   64.80   10.30 139-0.37878 0.75118 0.87140 0.59342-0.15764 0.68738
   1  12  -1   -8.77    5.63 139-0.37712 0.65681 0.87252 0.81204-0.15549 0.34202
   2   8   2  235.03   12.10 139-0.37921 0.88192 0.87111 0.32868-0.15819 0.69555
   3   8   0  632.68    9.72 138-0.38513 0.96131 0.86705 0.30753-0.16587 0.49952
   4   5  -3    5.80    4.14 140-0.37441 0.94440 0.87433-0.16896-0.15199 0.08533
   4   8  -4   51.85    5.90 140-0.36671 0.93454 0.87939 0.22965-0.14205 0.01726
  -5   7   7    1.90    7.17 140-0.36671-0.03024 0.87934 0.17610-0.14211 0.93413
  -4   5   7   31.50    7.75 140-0.36903 0.10182 0.87784-0.08790-0.14509 0.94780
  -4   6   7    3.15    7.15 140-0.37205 0.11790 0.87585 0.05471-0.14899 0.97321
  -2  13   1    0.87    3.75 141-0.36093 0.26383 0.88304 0.94832-0.13469 0.45316
  -1  12   2   17.98    6.02 140-0.36460 0.45241 0.88070 0.84187-0.13939 0.61463
  -1  13   0    1.27    4.11 141-0.36127 0.37988 0.88283 0.94537-0.13512 0.37745
   0   5   5   35.99    9.91 139-0.37202 0.64826 0.87587-0.06875-0.14895 0.89713
   0   6   5    8.88   10.27 140-0.37137 0.65936 0.87630 0.07271-0.14811 0.92040
   0   9   4   43.33   11.21 139-0.37119 0.65703 0.87642 0.47301-0.14788 0.85810
   1   9   3 1340.02   13.88 140-0.36442 0.76519 0.88082 0.46592-0.13917 0.77620
   1  11   1   -5.56    8.33 140-0.36694 0.71635 0.87919 0.70973-0.14241 0.56601
   2  11  -1    7.23    7.16 139-0.37230 0.78905 0.87569 0.68511-0.14931 0.37094
   3   5   1  114.38    9.29 140-0.36429 0.94268 0.88090-0.10902-0.13899 0.53260
   3   6   1  -11.53   10.02 139-0.37230 0.96013 0.87569 0.03568-0.14931 0.56255
   3  10  -2   53.70    7.71 140-0.36724 0.88606 0.87900 0.53708-0.14279 0.26569
   4   5  -5   27.33    2.08 142-0.33812 0.82342 0.89685-0.23157-0.10563-0.21607
   4   6  -2   -8.34    6.37 141-0.36278 0.98974 0.88186-0.01403-0.13707 0.22137
   4   8  -5   -5.34    4.50 141-0.35491 0.87960 0.88680 0.19533-0.12699-0.13164
  -6   6   7   15.08    5.25 142-0.35210-0.21549 0.88850 0.01305-0.12330 0.84815
  -4   7   7   39.82    8.49 140-0.35945 0.12022 0.88394 0.18779-0.13270 0.97685
  -3   9   6   -6.73    8.97 141-0.35788 0.25870 0.88492 0.46417-0.13068 0.94573
  -2   3   6   34.94    7.32 141-0.35280 0.33048 0.88806-0.37191-0.12420 0.85408
  -2   8   6  -13.90    8.96 141-0.36119 0.40798 0.88284 0.33957-0.13492 0.97873
  -2  11   4   12.92    6.04 141-0.36132 0.36239 0.88276 0.72390-0.13509 0.79123
  -1   9   5  146.63   10.83 141-0.35632 0.52666 0.88590 0.47111-0.12869 0.91660
   0   0  -2  211.36    1.85 141-0.35769 0.27852 0.88504-0.92467-0.13044-0.12467
   0   4   5   -2.75   10.54 141-0.35451 0.61769 0.88702-0.22156-0.12638 0.85298
   0   7   5  -49.20   12.51 141-0.35529 0.66057 0.88653 0.20383-0.12738 0.92404
   0  12   1   14.11    5.23 140-0.36144 0.56477 0.88268 0.83082-0.13525 0.53457
   1   4   4  252.27   11.34 141-0.35351 0.72888 0.88763-0.22527-0.12511 0.77794
   1   7   4   60.67   10.93 141-0.35906 0.77462 0.88418 0.19834-0.13220 0.84916
   2   2   1  148.37    6.40 141-0.35404 0.73523 0.88730-0.55471-0.12578 0.39985
   2   3   2   75.69    6.71 140-0.36056 0.79555 0.88324-0.39089-0.13411 0.55912
   3   7   1   37.02   10.39 141-0.35630 0.96196 0.88591 0.16847-0.12866 0.56882
   4   5  -2   -1.47    5.40 141-0.35187 0.96127 0.88864-0.16345-0.12301 0.18389
   4   7  -2   71.09    7.25 141-0.35879 0.99516 0.88435 0.12334-0.13186 0.24020
   4   8  -3   57.46    6.23 141-0.35473 0.96385 0.88688 0.24248-0.12666 0.12863
  -6   7   7    4.74    6.00 143-0.33761-0.21646 0.89713 0.14609-0.10474 0.85198
  -5   4   7   -8.35    5.40 144-0.32488-0.11515 0.90429-0.27038-0.08870 0.82683
  -4   4   7   38.52    6.61 142-0.34221 0.06154 0.89445-0.24662-0.11056 0.89167
  -3   5   7   23.16    8.78 142-0.34199 0.23125 0.89458-0.08986-0.11029 0.96609
  -3   6   7   24.97    9.87 143-0.33823 0.24440 0.89677 0.05147-0.10553 0.99115
  -2  10   5   -2.32    7.39 142-0.35037 0.38242 0.88957 0.59669-0.12094 0.88322
  -2  12   3   -0.18    4.38 142-0.34790 0.32054 0.89107 0.83665-0.11779 0.66862
  -1   5   6   12.14    8.83 141-0.34939 0.50956 0.89017-0.07662-0.11969 0.94718
  -1   6   6   -2.38    9.86 142-0.34963 0.52547 0.89002 0.06343-0.11999 0.96975
   0   2   4    0.24    5.97 142-0.34732 0.54076 0.89141-0.52816-0.11706 0.67020
   2   5   3   25.19    9.72 141-0.34883 0.85306 0.89051-0.09351-0.11898 0.71576
   2   6   3    2.28   10.00 141-0.35094 0.86736 0.88923 0.04822-0.12166 0.74319
   2  10   1   55.88    9.51 142-0.34582 0.83406 0.89231 0.56856-0.11515 0.56897
   3   3  -5   -1.09    1.17 144-0.31480 0.61943 0.90970-0.54395-0.07607-0.34440
   3   3   0   55.06    6.37 142-0.34144 0.85036 0.89490-0.42801-0.10959 0.32969
   3   9   0   90.22    9.62 142-0.34287 0.93307 0.89406 0.42313-0.11141 0.46658
  -5   8   7    4.55    6.82 143-0.33149-0.05200 0.90050 0.29675-0.09708 0.91346
  -4   2   6  815.76    4.72 144-0.32339-0.02719 0.90499-0.55992-0.08689 0.69469
  -4  11   5  -10.40    4.98 143-0.33151 0.06680 0.90049 0.70284-0.09710 0.77826
  -3   7   7  -28.10    9.65 143-0.33127 0.25099 0.90062 0.19076-0.09680 0.99633
  -1   4   6  270.58   10.04 143-0.33238 0.47761 0.89999-0.22648-0.09821 0.90251
  -1   7   6   10.43    9.83 143-0.33631 0.52306 0.89775 0.19863-0.10317 0.97551
   0   8   5   27.04   11.62 143-0.33172 0.64519 0.90037 0.33037-0.09737 0.91423
   1   2   3    8.94    7.70 144-0.32617 0.63712 0.90346-0.54649-0.09039 0.57056
   1   8   4  151.13   12.11 143-0.33226 0.76126 0.90006 0.32612-0.09806 0.83913
   1  12   0   10.99    5.81 143-0.32881 0.64728 0.90200 0.81152-0.09371 0.41547
   2   7   3    1.62   10.26 142-0.33879 0.86982 0.89632 0.18326-0.10631 0.74852
   2   9   2   10.10    9.19 142-0.33877 0.85616 0.89633 0.44657-0.10629 0.66669
   3   4   1    8.42    6.77 142-0.33896 0.90305 0.89622-0.26632-0.10652 0.47693
   3   8   1  104.51   10.90 143-0.33141 0.94920 0.90054 0.29429-0.09698 0.55891
   3  10  -1    9.90    8.21 142-0.33430 0.89184 0.89890 0.53488-0.10063 0.34907
   4   6  -1   -4.01    7.33 143-0.32950 0.99399 0.90161-0.01465-0.09457 0.30562
   4   8  -2   -7.97    7.26 143-0.33054 0.98077 0.90103 0.24102-0.09588 0.22007
  -5  10   6    1.67    4.93 145-0.31443-0.08414 0.90968 0.55352-0.07560 0.81487
  -4   8   7   -3.48    6.60 144-0.32507 0.10304 0.90395 0.31512-0.08893 0.95947
  -4  10   6    1.30    6.09 145-0.31237 0.07069 0.91075 0.56954-0.07303 0.86574
  -3   2   6   17.47    5.54 144-0.31657 0.12490 0.90855-0.54828-0.07827 0.73360
  -3   4   7    2.10    7.63 144-0.32087 0.19635 0.90624-0.24331-0.08366 0.91479
  -2   9   6   37.48    9.30 144-0.32158 0.37788 0.90586 0.45582-0.08455 0.94939
  -1   1   4  857.80    5.92 144-0.32067 0.34458 0.90635-0.69748-0.08341 0.56626
  -1   2   5  536.14    6.38 143-0.32626 0.40491 0.90330-0.53335-0.09042 0.72405
   0   1   3   18.61    4.70 143-0.32664 0.46621 0.90309-0.70122-0.09090 0.49621
   0  10   4   97.13    9.14 144-0.31669 0.61610 0.90848 0.58490-0.07843 0.81549
   0  11   3   74.40    7.71 143-0.32267 0.59262 0.90527 0.70861-0.08592 0.71608
   2   4   3   40.29    8.69 143-0.32734 0.81814 0.90270-0.24811-0.09178 0.66672
   2  11   0  -10.47    6.32 144-0.32474 0.79050 0.90414 0.67594-0.08851 0.43261
   4   4  -3   51.52    3.84 145-0.30464 0.86073 0.91472-0.35081-0.06340-0.02441
   4   5  -1   13.32    6.77 144-0.31502 0.96595 0.90937-0.16534-0.07633 0.26786
   4   7  -1  290.50    8.42 144-0.32255 0.99953 0.90533 0.12373-0.08576 0.31934
   4   9  -4   -1.23    5.22 144-0.31026 0.88935 0.91185 0.33736-0.07039-0.03421
  -6   8   7   11.59    5.53 146-0.29761-0.24341 0.91825 0.26680-0.05461 0.82512
  -3   1   5  154.79    3.29 146-0.29693 0.05045 0.91858-0.71990-0.05377 0.56316
  -3   8   7    6.12    8.86 145-0.30324 0.23502 0.91546 0.31252-0.06160 0.98266
  -3  11   5   -0.46    4.77 145-0.31252 0.19919 0.91071 0.70272-0.07315 0.80804
  -3  12   4   -3.46    4.31 146-0.30108 0.15935 0.91654 0.81835-0.05891 0.68868
  -2   5   7   34.00    9.98 145-0.30534 0.35120 0.91440-0.09629-0.06420 0.96605
  -2   6   7   -3.12   10.69 145-0.30558 0.36447 0.91428 0.04652-0.06450 0.99238
  -1   0   2  728.14    2.09 145-0.30109 0.23013 0.91653-0.89012-0.05893 0.26430
  -1   8   6   13.49   10.86 144-0.31252 0.51089 0.91071 0.32470-0.07315 0.96412
  -1  11   4    2.59    5.86 144-0.31252 0.46969 0.91071 0.70944-0.07315 0.77969
   0   0  -1  100.01    1.07 145-0.30781 0.27039 0.91315-0.93235-0.06727-0.06037
   0   3   5   16.78    7.44 144-0.31537 0.56325 0.90922-0.38574-0.07671 0.78077
   1   3   4   18.92    7.86 145-0.31277 0.67579 0.91058-0.39051-0.07346 0.70283
   1  10   3  -10.33    7.77 145-0.31216 0.73207 0.91090 0.57616-0.07270 0.72786
   1  11   2    5.01    7.58 144-0.31107 0.69678 0.91147 0.69671-0.07134 0.62355
   2   8   3   60.30    9.98 144-0.31330 0.85941 0.91030 0.30706-0.07413 0.73806
   2  12  -2    3.32    5.00 145-0.30280 0.69202 0.91568 0.76879-0.06104 0.17595
   3   6   2   21.43   10.94 145-0.30722 0.93826 0.91345 0.01813-0.06654 0.61299
   3  11  -3    5.08    5.50 145-0.30241 0.79272 0.91587 0.62033-0.06056 0.07715
   4   4  -2   -0.35    5.09 146-0.29834 0.89405 0.91789-0.33558-0.05552 0.09659
   4   9  -3   32.44    6.08 145-0.30262 0.92558 0.91577 0.35461-0.06083 0.08485
  -5   2   6  580.19    2.92 148-0.26627-0.24085 0.93259-0.60299-0.01614 0.57334
  -4   1   5  469.12    2.21 148-0.27374-0.13018 0.92936-0.74629-0.02528 0.48337
  -3  10   6   -3.70    6.82 146-0.29549 0.21335 0.91931 0.57573-0.05205 0.89269
  -2   7   7   29.95   10.48 146-0.29195 0.36577 0.92102 0.18293-0.04767 0.99883
  -1  10   5   16.39    7.26 145-0.30124 0.48656 0.91649 0.58344-0.05917 0.87156
  -1  12   3   -9.60    4.94 146-0.29538 0.42890 0.91937 0.82581-0.05191 0.65405
   0  12   2   49.95    4.88 145-0.30114 0.54595 0.91654 0.81806-0.05905 0.58696
   1   9   4  363.26   11.58 146-0.29315 0.73576 0.92044 0.44688-0.04916 0.81423
   3   5   2  -14.13    8.49 146-0.30075 0.92041 0.91673-0.12609-0.05857 0.57807
   3   7   2   81.73   11.70 146-0.29629 0.94355 0.91892 0.15184-0.05304 0.61979
   3   9   1  133.13   10.19 146-0.29130 0.92315 0.92133 0.41361-0.04687 0.53127
   4   8  -1  -11.13    8.38 146-0.29471 0.98736 0.91969 0.24665-0.05108 0.30482
  -4   3   7  311.56    5.38 147-0.27993-0.01649 0.92681-0.41948-0.03236 0.79028
  -2   4   7   30.66    8.89 147-0.28264 0.31600 0.92558-0.24678-0.03569 0.91660
  -2  11   5    6.13    6.04 148-0.27698 0.31935 0.92813 0.70097-0.02875 0.81523
  -1   3   6    1.17    7.15 147-0.28844 0.42208 0.92290-0.39164-0.04283 0.82712
   0   5   6   -1.61   11.79 147-0.28060 0.59662 0.92651-0.09788-0.03318 0.91172
   0   6   6   -6.08   12.31 147-0.28251 0.61466 0.92564 0.04344-0.03553 0.93689
   0   9   5   70.65    8.66 146-0.29099 0.61982 0.92169 0.45133-0.04598 0.88817
   1   1   2  204.05    5.07 147-0.28656 0.54072 0.92377-0.72586-0.04052 0.36925
   1   6   5  168.01   10.89 146-0.29112 0.73507 0.92163 0.04248-0.04614 0.87033
   1  12   1    0.73    5.39 147-0.27939 0.63749 0.92706 0.80384-0.03170 0.48085
   2   3   3 1093.91   10.38 147-0.28275 0.76157 0.92553-0.40996-0.03583 0.58899
   2  10   2    5.72    7.57 147-0.28708 0.81594 0.92353 0.55960-0.04115 0.62341
   3   3   1 1174.53    8.59 147-0.28251 0.83477 0.92564-0.43545-0.03553 0.38352
   3  10   0   -2.68    8.20 146-0.28844 0.88912 0.92290 0.53303-0.04283 0.41994
   3  11  -2    7.17    5.27 147-0.28036 0.81332 0.92662 0.63098-0.03289 0.17848
   4   4  -4   -5.83    2.14 149-0.25644 0.77173 0.93686-0.39382-0.00368-0.21197
   4   6   0   11.91    8.68 147-0.28526 0.99059 0.92438-0.01949-0.03891 0.37951
   4   7   0   39.82    9.46 147-0.28045 0.99714 0.92658 0.11953-0.03300 0.39457
   4   9  -2   35.92    7.06 146-0.28656 0.94730 0.92377 0.36506-0.04052 0.19334
  -5   9   7  -11.43    5.12 149-0.26349-0.10917 0.93400 0.41230-0.01237 0.86099
  -4   9   7    9.62    5.24 148-0.27643 0.06215 0.92842 0.42728-0.02817 0.92141
  -3   3   7    7.21    6.42 149-0.26540 0.12774 0.93319-0.41136-0.01470 0.82573
  -2   2   6  -10.12    6.16 148-0.27185 0.23555 0.93043-0.55530-0.02257 0.73203
  -2  12   4   -9.84    4.29 149-0.26349 0.27780 0.93400 0.82004-0.01237 0.69533
  -1   9   6   25.56    9.61 148-0.27140 0.48357 0.93063 0.44678-0.02202 0.93743
   0   7   6   20.42   12.23 147-0.27379 0.61510 0.92959 0.18046-0.02495 0.94579
   1   7   5   14.58   10.45 147-0.27938 0.73722 0.92710 0.17859-0.03179 0.87891
   2   2   2  335.55    6.33 147-0.27801 0.70193 0.92772-0.57374-0.03011 0.43312
   2   6   4   -6.07   10.78 147-0.27797 0.83675 0.92774 0.03079-0.03006 0.77741
   2   9   3   66.14    9.02 147-0.27578 0.83385 0.92871 0.43137-0.02738 0.71408
   2  11   1  -16.24    6.97 149-0.26349 0.77228 0.93400 0.68054-0.01237 0.49547
   2  12  -1    3.10    4.88 147-0.27602 0.70402 0.92860 0.77138-0.02767 0.27110
   3   2  -2  195.78    2.88 149-0.25307 0.66933 0.93824-0.65066 0.00028-0.05691
   3   4   2   75.49    7.54 147-0.27533 0.87979 0.92891-0.27969-0.02683 0.52582
   3   8   2   -7.94   10.74 147-0.27602 0.93195 0.92860 0.28493-0.02767 0.61397
   4   4  -1   28.27    5.83 148-0.26936 0.90762 0.93151-0.32816-0.01953 0.18661
   4   5   0   71.31    8.11 148-0.27287 0.96465 0.92999-0.16372-0.02381 0.34086
  -3   9   7   51.84    7.77 149-0.25954 0.20091 0.93566 0.43203-0.00771 0.95015
  -2   1   5  426.58    4.79 149-0.26069 0.16979 0.93519-0.72102-0.00911 0.56866
  -2   8   7   13.62    7.93 148-0.26542 0.35093 0.93322 0.31060-0.01487 0.98765
  -2  10   6   20.68    6.08 149-0.26263 0.33322 0.93439 0.57147-0.01147 0.90103
   0   4   6  418.18   11.49 149-0.26065 0.56254 0.93521-0.24596-0.00906 0.86607
   2   7   4  289.72   10.48 148-0.26622 0.83944 0.93288 0.16662-0.01584 0.78763
   3   2  -1  252.69    4.12 149-0.25344 0.71001 0.93813-0.63029-0.00030 0.07161
   4   8   0  187.66    9.57 149-0.25332 0.98614 0.93817 0.25093-0.00015 0.38768
   4   9  -1   11.83    7.52 150-0.25056 0.95609 0.93926 0.37184 0.00318 0.27787
  -5   6   8   -8.17    6.72 151-0.23906-0.12785 0.94367-0.00193 0.01687 0.88787
  -4   5   8   -4.08    7.15 150-0.24103 0.01525 0.94294-0.13240 0.01450 0.91508
  -4   6   8    3.34    7.58 150-0.24417 0.03126 0.94176 0.01193 0.01072 0.94700
  -2   0   3  607.25    1.91 152-0.22448 0.03776 0.94885-0.91750 0.03437 0.24616
  -1   5   7   51.87    9.11 149-0.25028 0.45362 0.93940-0.10471 0.00333 0.95185
  -1   6   7   -5.97    9.53 149-0.25399 0.46941 0.93794 0.03769-0.00116 0.97921
  -1   7   7    6.50   11.03 151-0.24027 0.47017 0.94323 0.17464 0.01542 0.98775
   0   2   5   22.13    8.08 150-0.24696 0.48167 0.94070-0.55652 0.00735 0.67322
   0   8   6   -2.46   11.13 151-0.23807 0.60032 0.94404 0.31458 0.01807 0.93812
   0  11   4   21.89    6.46 150-0.24868 0.56198 0.94003 0.69373 0.00527 0.75335
   1   8   5    6.03    9.54 149-0.25415 0.72585 0.93787 0.30905-0.00136 0.87147
   1  11   3   47.77    7.03 150-0.24563 0.67242 0.94121 0.68440 0.00896 0.67343
   2   1  -1  185.39    2.48 151-0.23740 0.52591 0.94428-0.79266 0.01887-0.02089
   2   8   4  -18.31   11.65 149-0.24928 0.82853 0.93980 0.29638 0.00454 0.78161
   3  11  -1    4.38    5.54 150-0.24931 0.82301 0.93978 0.63759 0.00450 0.26930
  -5   5   8   77.32    6.37 152-0.22482-0.16023 0.94871-0.15303 0.03387 0.84434
  -5   7   8    2.26    5.83 151-0.23170-0.12403 0.94631 0.13186 0.02563 0.89702
  -4   7   8    3.52    7.09 150-0.23704 0.03773 0.94439 0.14932 0.01922 0.95657
  -3   6   8   65.76    9.04 151-0.23517 0.17888 0.94507 0.02230 0.02147 0.98013
  -2   3   7   32.39    7.96 151-0.23117 0.25148 0.94650-0.40983 0.02628 0.83488
  -1  11   5   36.59    5.94 151-0.23083 0.42797 0.94662 0.69212 0.02668 0.80810
   0  10   5   -2.61    6.79 151-0.23742 0.58180 0.94425 0.56970 0.01876 0.84497
   0  12   3    3.83    4.77 151-0.22845 0.51451 0.94746 0.81215 0.02953 0.62646
   1   2   4   42.35    6.96 150-0.24038 0.58881 0.94315-0.56804 0.01519 0.58980
   1  10   4   30.58    7.31 150-0.23986 0.69664 0.94335 0.56549 0.01582 0.77268
   2  12   0   -1.72    4.79 151-0.23013 0.70427 0.94687 0.77278 0.02752 0.34083
   3   5   3   -3.45   11.40 151-0.23366 0.89574 0.94561-0.13381 0.02328 0.62681
   3   6   3   -0.42    9.47 150-0.24135 0.91612 0.94279 0.01010 0.01402 0.65825
   3   7   3   84.07   11.78 151-0.23272 0.92069 0.94595 0.14678 0.02441 0.67004
   3   9   2   33.83    9.84 151-0.23069 0.90683 0.94667 0.41143 0.02685 0.58754
   3  10   1   41.47    8.12 151-0.23602 0.87992 0.94476 0.53157 0.02044 0.48698
   4   4   0   53.30    7.13 151-0.23144 0.91134 0.94641-0.32312 0.02595 0.27117
   4   6   1   30.01   10.09 151-0.23296 0.98283 0.94586-0.01821 0.02412 0.44503
   4   7   1   -4.15   10.24 151-0.23047 0.98959 0.94675 0.11715 0.02711 0.45976
   4  10  -3    0.38    5.25 153-0.21360 0.85388 0.95243 0.46288 0.04726 0.00067
  -3   5   8    7.67    7.39 152-0.22522 0.15609 0.94853-0.12303 0.03329 0.94853
  -3   7   8   11.61    8.54 152-0.21750 0.17514 0.95113 0.15847 0.04251 0.98764
  -3  11   6  -12.77    4.46 152-0.21762 0.14979 0.95108 0.68293 0.04237 0.81522
  -2   9   7   27.53    7.81 152-0.22027 0.31957 0.95021 0.43635 0.03921 0.95799
  -1   2   6   34.22    7.59 152-0.21526 0.33705 0.95186-0.56228 0.04518 0.71447
  -1   4   7  -22.46    8.26 152-0.22643 0.41850 0.94811-0.25395 0.03184 0.90277
  -1  12   4    1.31    4.05 152-0.21871 0.38893 0.95072 0.81129 0.04106 0.68993
   0   1   4  113.46    5.49 152-0.22399 0.40472 0.94895-0.72627 0.03476 0.49761
   0   3   6   -2.11    9.59 151-0.22275 0.51046 0.94937-0.40298 0.03625 0.79226
   1   3   5   37.09    8.89 151-0.22486 0.63140 0.94865-0.40791 0.03372 0.72331
   1  12   2   47.56    5.13 152-0.21781 0.61810 0.95102 0.79885 0.04215 0.53657
   2   1   0    7.17    3.21 151-0.22503 0.55198 0.94859-0.77788 0.03351 0.09172
   2  10   3   34.18    8.53 152-0.21808 0.79182 0.95093 0.55401 0.04182 0.67320
   3   2   0    6.73    5.47 151-0.22465 0.72067 0.94873-0.62199 0.03397 0.16485
   3   3   2  158.68    8.50 152-0.22079 0.81405 0.95003-0.44209 0.03858 0.43871
   4   5   1   -4.68    9.21 152-0.21976 0.95647 0.95038-0.16811 0.03982 0.40441
   4  10  -2    1.48    5.89 152-0.21333 0.88938 0.95248 0.47783 0.04748 0.12815
  -4   4   8    3.33    6.23 154-0.20208-0.03770 0.95598-0.28661 0.06086 0.84745
  -4   8   8   27.50    6.43 153-0.20649 0.01969 0.95464 0.27902 0.05564 0.94144
  -4  10   7   16.14    4.75 153-0.20592 0.00365 0.95482 0.54005 0.05631 0.85816
  -1   0  -1  344.13    1.86 153-0.21259 0.01794 0.95273-0.98748 0.04839-0.22770
  -1   8   7   -0.77    7.97 152-0.21536 0.45772 0.95184 0.30637 0.04509 0.97861
  -1  10   6  388.26    7.03 152-0.21280 0.43663 0.95266 0.56679 0.04814 0.89319
   0   9   6  -20.36    9.18 154-0.19934 0.57353 0.95680 0.44170 0.06411 0.91277
   1   6   6   26.04   12.59 153-0.20820 0.69292 0.95411 0.02949 0.05361 0.89601
   1   9   5   47.32    8.23 152-0.21497 0.70097 0.95196 0.43367 0.04556 0.84833
   2   2   3   58.84    8.50 153-0.20498 0.66944 0.95510-0.58330 0.05742 0.47254
   2   3   4   41.49   10.88 153-0.20462 0.72652 0.95522-0.41966 0.05785 0.62460
   2   9   4   59.81   10.18 153-0.20471 0.80375 0.95519 0.42564 0.05774 0.75786
   2  11   2   55.94    5.65 152-0.21454 0.75739 0.95210 0.67053 0.04607 0.56290
   3   4   3   86.16   10.92 153-0.20792 0.85531 0.95420-0.28468 0.05393 0.57454
   3   8   3   48.19   11.04 153-0.20952 0.91003 0.95370 0.28091 0.05204 0.66498
   3  11   0   14.51    5.85 153-0.20578 0.82262 0.95486 0.64353 0.05648 0.34608
   4   8   1   44.64    9.63 153-0.20429 0.97899 0.95532 0.25322 0.05825 0.45743
   4   9   0    4.54    8.09 153-0.20465 0.95691 0.95521 0.37920 0.05781 0.35295
  -5   8   8   -2.04    4.83 155-0.18647-0.15776 0.96045 0.26123 0.07943 0.87168
  -3   0   1   -3.30    1.43 154-0.19223-0.24059 0.95886-0.98194 0.07265-0.09445
  -3   4   8    1.12    7.93 154-0.19661 0.11359 0.95760-0.27340 0.06748 0.89091
  -3   8   8   12.20    7.59 154-0.19144 0.16255 0.95908 0.28935 0.07359 0.97589
  -3  10   7   22.16    5.28 154-0.19174 0.14476 0.95899 0.55099 0.07323 0.89375
  -2   5   8   24.95    9.90 153-0.19708 0.28458 0.95747-0.11877 0.06694 0.96091
  -2   6   8   -9.91    8.15 154-0.19918 0.30399 0.95686 0.02755 0.06445 0.99102
  -1   1   5   23.59    5.00 153-0.20109 0.26979 0.95629-0.72811 0.06219 0.54706
   0   0   1   91.08    1.34 153-0.19893 0.24405 0.95693-0.93546 0.06475 0.06391
   1   1   3   25.74    5.80 153-0.20308 0.49677 0.95569-0.74059 0.05984 0.39413
   1   5   6  133.20   10.38 153-0.20080 0.67463 0.95638-0.11250 0.06253 0.86838
   1   7   6    9.70   11.62 155-0.18804 0.69477 0.96002 0.16958 0.07758 0.90677
   2   5   5    5.31   13.13 154-0.19576 0.78275 0.95785-0.12040 0.06849 0.78372
   2   6   5  320.90   11.14 153-0.19980 0.80091 0.95667 0.02150 0.06371 0.81293
  -3   0   2   -2.87    1.20 156-0.16640-0.22393 0.96553-0.96773 0.10274 0.00329
  -2   7   8    6.54    8.15 155-0.18609 0.30002 0.96056 0.16279 0.07970 0.99959
  -2  11   6  -11.54    4.69 155-0.18048 0.27011 0.96205 0.68943 0.08628 0.82502
  -1   3   7    7.79    9.09 155-0.18419 0.35913 0.96107-0.40888 0.08194 0.82768
   0   5   7   22.68   10.01 155-0.18592 0.54436 0.96061-0.11136 0.07991 0.92689
   0   6   7   34.65    9.77 154-0.18950 0.56238 0.95962 0.03134 0.07569 0.95475
   0   7   7    3.49   10.95 155-0.18107 0.56505 0.96189 0.16878 0.08560 0.96441
   1   4   6   11.04   12.58 155-0.18069 0.64007 0.96199-0.25985 0.08604 0.82059
   2   1   1   19.47    4.66 155-0.18591 0.55389 0.96061-0.76990 0.07992 0.17368
   2   7   5   49.21    9.77 155-0.18749 0.80524 0.96018 0.16063 0.07806 0.82353
   3   2   1  132.26    7.03 155-0.18224 0.72140 0.96159-0.61386 0.08423 0.24320
   3  10   2    9.11    7.64 155-0.17746 0.86358 0.96282 0.53405 0.08982 0.54515
   4   3  -2   22.77    3.94 155-0.17769 0.76030 0.96277-0.52194 0.08955-0.07052
   4   3  -1    1.34    4.87 155-0.17613 0.80270 0.96316-0.50105 0.09138 0.05387
   4   4   1   17.75    6.70 154-0.18707 0.90877 0.96029-0.31607 0.07855 0.34452
   4   6   2   -3.68   10.67 155-0.17972 0.96998 0.96224-0.01949 0.08718 0.50493
   4  10  -1   -3.52    5.80 155-0.18166 0.90425 0.96174 0.48497 0.08491 0.21202
   5   7  -3  306.73    5.58 156-0.16791 0.92064 0.96518 0.03656 0.10098-0.06809
  -3   2   7  262.15    5.52 156-0.16920 0.01733 0.96486-0.58336 0.09919 0.68646
  -2   4   8   30.55    9.14 156-0.16520 0.23924 0.96581-0.26679 0.10386 0.90761
  -1   0   3   70.99    3.00 156-0.16489 0.13579 0.96588-0.91901 0.10422 0.22673
  -1   9   7  -13.14    6.63 156-0.17288 0.43402 0.96396 0.43785 0.09490 0.94996
   1   1  -3   -2.59    1.38 157-0.16035 0.19917 0.96692-0.87629 0.10950-0.41680
   1   8   6   -1.78   10.35 155-0.17319 0.68464 0.96389 0.30044 0.09454 0.89986
   1  11   4  -19.72    5.66 156-0.16674 0.64231 0.96544 0.68429 0.10206 0.70469
   2   8   5   66.90   11.03 156-0.16544 0.79331 0.96575 0.29641 0.10358 0.81873
   2  12   1    3.50    3.95 156-0.17238 0.68779 0.96409 0.78136 0.09549 0.40665
   3   2  -3   17.90    1.02 162-0.08724 0.46131 0.97863-0.71344 0.19306-0.37618
   3   5   4   37.60   12.00 156-0.16415 0.86698 0.96605-0.13553 0.10507 0.67448
   3   6   4    2.57   10.35 156-0.17230 0.89014 0.96411 0.00617 0.09558 0.70113
   3   9   3   53.90    9.36 156-0.16974 0.88423 0.96473 0.41019 0.09856 0.64273
   4   5   2  -15.67   10.25 156-0.16819 0.94539 0.96510-0.15906 0.10038 0.47331
   4   7   2   57.08    8.90 155-0.17298 0.97571 0.96394 0.12149 0.09478 0.52605
   4   9   1   51.66    8.60 156-0.16234 0.95126 0.96647 0.38379 0.10718 0.43209
   5   6  -3  173.38    4.65 157-0.15787 0.89782 0.96747-0.10747 0.11238-0.10209
   5   6  -2   36.45    5.34 156-0.16613 0.94706 0.96559-0.08651 0.10278 0.03567
   5   7  -2  170.84    6.11 156-0.16923 0.96371 0.96485 0.05692 0.09915 0.06280
  -4   9   8   10.73    4.97 158-0.14789-0.02569 0.96960 0.40707 0.12387 0.89801
  -2   0   0   -0.45    1.52 157-0.15492-0.15779 0.96814-0.99712 0.11574-0.21789
  -2   2   7   16.17    6.81 157-0.15287 0.15849 0.96857-0.57279 0.11811 0.71576
  -2   8   8   10.30    6.95 156-0.15948 0.28620 0.96714 0.29665 0.11044 0.98913
  -2  10   7   14.91    4.87 156-0.16008 0.27159 0.96700 0.55838 0.10975 0.90720
  -1   6   8  -15.23   10.55 157-0.15285 0.41355 0.96858 0.02915 0.11813 0.98612
   0   4   7   45.25    9.20 156-0.16371 0.50881 0.96618-0.25961 0.10553 0.87828
   0   8   7    3.45    9.71 156-0.15753 0.55335 0.96757 0.30262 0.11271 0.95691
   0  11   5    4.20    4.43 156-0.16313 0.51803 0.96631 0.68914 0.10620 0.78087
   1   2   5   38.07    9.48 157-0.15574 0.54757 0.96796-0.56943 0.11478 0.61989
   1  10   5   46.18    6.20 156-0.16019 0.65713 0.96698 0.56053 0.10962 0.80730
   3   3   3  112.77    8.24 156-0.15976 0.79326 0.96708-0.43885 0.11013 0.49503
   3   7   4  217.06   10.05 156-0.16301 0.89250 0.96634 0.14730 0.10634 0.71804
   3  11   1    3.15    5.58 157-0.15476 0.81330 0.96817 0.65045 0.11592 0.41486
   4   3   0    7.75    6.32 157-0.15521 0.82272 0.96807-0.48716 0.11540 0.15863
   5   6  -1    4.00    6.96 157-0.15123 0.97342 0.96892-0.06834 0.12000 0.14453
   5   7  -1   11.85    7.18 157-0.15312 0.98668 0.96852 0.07270 0.11782 0.16887
   5   8  -3   26.06    5.37 158-0.14265 0.90869 0.97064 0.17207 0.12992-0.07382
   5   8  -2   19.35    6.56 157-0.14641 0.95313 0.96990 0.19205 0.12558 0.05863
  -3   1   6   23.31    3.67 159-0.13137-0.07152 0.97271-0.75390 0.14299 0.49388
  -3   3   8   21.91    6.92 159-0.13498 0.03956 0.97208-0.43033 0.13885 0.79776
  -3   9   8    7.49    5.59 159-0.13693 0.12033 0.97172 0.42127 0.13660 0.93854
  -1   5   8   73.64    9.19 158-0.14667 0.38900 0.96986-0.11528 0.12539 0.95769
  -1   7   8  -12.63    9.63 158-0.14061 0.41570 0.97104 0.16889 0.13238 0.99539
   0   0   2  242.83    2.88 158-0.14514 0.23103 0.97016-0.92844 0.12715 0.12808
   0   2   6   56.46    7.28 157-0.14871 0.42442 0.96944-0.56506 0.12303 0.68788
   0  10   6   39.27    5.73 157-0.14873 0.53026 0.96944 0.56438 0.12301 0.86974
   0  12   4    4.91    3.03 157-0.15057 0.47656 0.96906 0.80636 0.12088 0.66099
   0  12   4    4.77    1.89 157-0.14725 0.47368 0.96974 0.80905 0.12472 0.65846
   1   3   6   -7.08   11.55 158-0.14011 0.58733 0.97113-0.41063 0.13296 0.74909
   1  12   3   16.73    4.24 158-0.13815 0.58218 0.97150 0.80486 0.13520 0.57445
   2   1   2   96.36    7.04 158-0.13846 0.54861 0.97144-0.76014 0.13485 0.24613
   2  10   4  -17.96    6.29 158-0.14746 0.76594 0.96970 0.55249 0.12447 0.71077
   2  11   3    4.95    4.91 158-0.14525 0.73037 0.97014 0.67475 0.12703 0.60797
   3   4   4   18.33   12.39 158-0.14024 0.82844 0.97111-0.28332 0.13280 0.62277
   3   8   4  137.62   10.78 158-0.13891 0.88283 0.97136 0.28261 0.13433 0.71217
   4   8   2   38.49    8.06 157-0.14911 0.96556 0.96936 0.26061 0.12257 0.52163
   4  10   0   -4.10    5.96 157-0.14821 0.90743 0.96955 0.50114 0.12361 0.30737
   5   5  -2   17.46    5.53 158-0.13214 0.89925 0.97258-0.23481 0.14211-0.02635
   5   7  -4   -1.48    3.54 159-0.12598 0.83609 0.97362 0.00654 0.14916-0.24531
  -4   3   8    3.11    5.34 159-0.12520-0.12728 0.97373-0.44493 0.15032 0.73641
  -2   1   6  293.64    5.38 159-0.13229 0.08239 0.97254-0.73774 0.14221 0.54503
  -1  11   6    4.81    4.46 160-0.12388 0.36525 0.97394 0.69409 0.15183 0.81765
   0   1   5  157.42    6.21 159-0.13298 0.35477 0.97242-0.72833 0.14141 0.51916
   1   1   4   21.82    7.79 160-0.12365 0.46173 0.97398-0.73867 0.15209 0.43391
   1   9   6   78.73    8.54 159-0.13166 0.65704 0.97265 0.43387 0.14293 0.87606
   2   2   4  109.70    8.06 158-0.13479 0.64107 0.97209-0.57876 0.13933 0.51939
   2   9   5   -2.90    8.80 158-0.13439 0.76822 0.97217 0.42432 0.13980 0.79639
   3   2   2   48.83    6.48 158-0.13535 0.71459 0.97199-0.60495 0.13869 0.31651
   4   3  -3    1.53    2.40 161-0.09793 0.64247 0.97752-0.55674 0.18131-0.29285
   4   4   2  -16.19    7.89 159-0.13583 0.89991 0.97191-0.31073 0.13815 0.41047
   5   5  -1  113.80    6.54 159-0.12484 0.93472 0.97379-0.21476 0.15074 0.09315
   5   6   0   12.37    8.27 159-0.12371 0.98689 0.97397-0.05298 0.15202 0.23954
   5   8  -1   73.67    7.07 159-0.12756 0.97635 0.97334 0.20893 0.14763 0.16407
  -4   6   9    9.23    6.39 160-0.11409-0.05797 0.97541-0.00322 0.16296 0.91611
  -3   6   9  -22.81    7.66 160-0.11283 0.10163 0.97559 0.01469 0.16440 0.96526
  -2   3   8  -25.27    8.11 160-0.11538 0.17795 0.97523-0.41555 0.16150 0.82831
  -2   9   8   11.11    6.01 160-0.11177 0.25110 0.97574 0.42843 0.16561 0.95731
  -1   4   8   23.29    8.84 160-0.12208 0.35222 0.97421-0.26034 0.15387 0.90820
  -1   8   8  -18.26    8.18 160-0.11395 0.40119 0.97543 0.30465 0.16312 0.98586
   0   3   7   46.90    8.57 159-0.12253 0.45520 0.97414-0.40694 0.15335 0.80803
   1   5   7   -9.04   12.35 160-0.11106 0.62703 0.97584-0.11151 0.16640 0.89374
   1   6   7   30.45   11.96 160-0.11658 0.64440 0.97505 0.02910 0.16013 0.92142
   2   2  -4  494.13    2.11 161-0.10063 0.27797 0.97718-0.74512 0.17822-0.54193
   2   5   6  338.12   13.61 160-0.11514 0.74316 0.97526-0.11747 0.16177 0.81906
   2   6   6   80.42   10.19 159-0.12051 0.76215 0.97446 0.02547 0.15566 0.84713
   3  10   3   59.79    7.05 160-0.11214 0.83959 0.97569 0.54089 0.16518 0.59888
   4   3   1   17.10    6.23 159-0.12390 0.83122 0.97392-0.47262 0.15179 0.24933
   4   6   3   47.01    9.75 159-0.12173 0.95177 0.97427-0.00694 0.15426 0.57034
   4   7   3   35.65   10.79 160-0.11394 0.95812 0.97543 0.13285 0.16314 0.58320
   5   5  -3   12.75    3.62 161-0.10316 0.82942 0.97687-0.25860 0.17537-0.18980
   5   6  -4   66.84    2.92 162-0.09286 0.79131 0.97806-0.13857 0.18699-0.30602
   5   7   0   16.93    8.41 159-0.12131 0.99754 0.97433 0.08788 0.15475 0.25913
  -4   5   9   10.68    6.33 162-0.09799-0.08764 0.97749-0.14633 0.18126 0.87705
  -4   7   9   27.03    5.67 161-0.10117-0.05751 0.97711 0.13610 0.17767 0.92502
  -3   5   9   31.94    7.81 161-0.10256 0.07519 0.97694-0.13200 0.17610 0.93084
  -3   7   9   19.44    6.97 161-0.09657 0.09429 0.97765 0.15016 0.18287 0.97187
  -1   1   6  104.54    6.67 161-0.09933 0.20605 0.97733-0.72835 0.17975 0.55680
  -1   2   7   23.61    6.89 160-0.11034 0.27412 0.97593-0.56722 0.16728 0.71886
  -1  10   7   26.86    4.68 160-0.11111 0.37629 0.97583 0.56477 0.16641 0.90231
   0   9   7   10.94    6.39 160-0.11136 0.52239 0.97579 0.43814 0.16613 0.93085
   1   7   7   24.48    9.01 160-0.10764 0.64794 0.97630 0.16960 0.17034 0.93132
   2   7   6  -11.21    8.95 161-0.10859 0.76836 0.97617 0.16343 0.16927 0.85557
   3   6   5   44.00   12.24 161-0.09961 0.85807 0.97730 0.01669 0.17943 0.74848
   3   9   4    0.47    8.50 161-0.09980 0.85574 0.97728 0.41946 0.17921 0.68814
   4   5   3   59.83    9.02 160-0.11169 0.92949 0.97575-0.15051 0.16575 0.53502
   4   9   2   24.24    6.68 160-0.10846 0.93821 0.97619 0.39481 0.16941 0.49393
   4  10   1   16.57    6.35 161-0.09818 0.90124 0.97747 0.51515 0.18104 0.37850
   5   5   0   -8.89    7.81 161-0.10237 0.95209 0.97697-0.20159 0.17631 0.18874
   5   8   0   35.85    7.53 161-0.09663 0.98709 0.97764 0.22556 0.18279 0.25599
   5   9  -2   -4.23    5.22 161-0.09346 0.91196 0.97799 0.32510 0.18636 0.01729
  -2   6   9   26.93    8.69 162-0.08349 0.22473 0.97902 0.02296 0.19759 0.98591
   0   0   3  558.84    5.26 162-0.08994 0.21613 0.97840-0.91617 0.19035 0.19272
   0   5   8  -12.00   11.32 162-0.08852 0.49186 0.97854-0.10737 0.19194 0.94252
   0   6   8   13.03    9.09 162-0.09351 0.50581 0.97802 0.03315 0.18633 0.97057
   1   4   7   48.66   10.38 162-0.09262 0.59295 0.97812-0.25641 0.18733 0.84680
   2   1   3   46.08    8.00 162-0.08730 0.53970 0.97866-0.74640 0.19332 0.31483
   2   4   6   10.94   10.94 162-0.09322 0.70924 0.97806-0.26083 0.18666 0.77200
   3   3   4    2.57    9.89 161-0.09626 0.77116 0.97772-0.42781 0.18323 0.55164
   3   5   5  242.53   10.97 161-0.09485 0.83786 0.97788-0.12623 0.18482 0.71950
   3   7   5  106.92   11.45 162-0.09223 0.86118 0.97816 0.15482 0.18776 0.76111
   3  11   2   31.50    4.36 161-0.09575 0.79512 0.97778 0.65988 0.18380 0.47584
   4   8   3   33.71    9.52 162-0.08818 0.94732 0.97857 0.27187 0.19232 0.57834
   5   6   1   27.99    9.37 162-0.08433 0.99122 0.97894-0.03692 0.19665 0.32434
  -2   5   9  196.16    9.36 163-0.07777 0.20347 0.97953-0.11713 0.20407 0.95621
  -2   7   9   19.44    7.81 163-0.07479 0.22728 0.97977 0.16193 0.20741 0.99473
  -1   0   0   23.41    0.85 163-0.07977-0.07347 0.97937-0.99411 0.20184-0.25314
  -1   0   4  144.13    4.20 163-0.07734 0.08890 0.97957-0.91238 0.20455 0.25449
  -1   3   8   11.95    9.52 164-0.07160 0.29025 0.98000-0.40959 0.21097 0.83355
   0   7   8   -1.18    8.14 163-0.08170 0.51282 0.97920 0.17514 0.19968 0.97868
   1   2   6  105.58   10.53 163-0.07693 0.50906 0.97960-0.55760 0.20502 0.65675
   1   8   7   -0.46    7.64 162-0.08171 0.63439 0.97920 0.30773 0.19966 0.92440
   1  11   5  -12.40    3.93 163-0.08086 0.59762 0.97928 0.69129 0.20062 0.73279
   2   8   6   22.36    7.71 162-0.08354 0.75343 0.97904 0.30310 0.19762 0.85154
   3   2   3   -0.17    7.55 162-0.08437 0.70558 0.97896-0.59090 0.19668 0.38478
   4   3   2   57.32    7.40 162-0.08326 0.83288 0.97906-0.45559 0.19793 0.32936
   4   4   3   79.56    8.92 162-0.08463 0.88882 0.97894-0.29366 0.19640 0.48136
   5   4  -1   -3.96    6.50 163-0.06895 0.86423 0.98018-0.36222 0.21393 0.00441
   5   5   1   -3.40    8.80 163-0.07381 0.96104 0.97984-0.18477 0.20850 0.28225
   5   7   1    7.31    7.81 163-0.08143 0.99983 0.97923 0.10367 0.19998 0.34181
   5   9  -1  -11.01    5.51 163-0.07617 0.93876 0.97966 0.33894 0.20587 0.11842
  -4   1   6  268.35    2.17 166-0.03492-0.32820 0.98147-0.77710 0.25157 0.33342
  -4   4   9   23.06    6.44 165-0.04983-0.14930 0.98115-0.29086 0.23516 0.80355
  -4   8   9   10.36    4.75 164-0.06428-0.08093 0.98048 0.27451 0.21914 0.90544
  -3   4   9   16.96    7.31 164-0.06774 0.02567 0.98027-0.27577 0.21529 0.87062
  -3   8   9    3.51    5.36 164-0.06393 0.07410 0.98051 0.28921 0.21953 0.95645
  -1   9   8    1.29    5.87 163-0.06839 0.36353 0.98023 0.43776 0.21456 0.95678
   0   4   8   62.10    9.64 163-0.06818 0.45422 0.98024-0.25102 0.21480 0.89659
   0  11   6    2.42    3.99 163-0.06834 0.46251 0.98023 0.69316 0.21462 0.79792
   1  10   6   -6.45    4.66 164-0.06924 0.61406 0.98017 0.57064 0.21362 0.82722
   2   2   5   39.32    9.31 164-0.06549 0.61440 0.98041-0.56549 0.21779 0.56809
   2  10   5   -4.65    5.33 164-0.06754 0.72616 0.98029 0.56256 0.21552 0.74675
   2  11   4    4.23    4.25 164-0.06721 0.69327 0.98031 0.68523 0.21588 0.64672
   3   4   5  174.84   10.87 163-0.07176 0.80128 0.98000-0.26974 0.21081 0.67243
   3   8   5  -12.42    7.71 164-0.06703 0.85336 0.98032 0.29322 0.21609 0.75110
   5   4  -2  168.13    4.89 165-0.05270 0.80808 0.98105-0.38355 0.23198-0.13977
   5   4   0   10.93    7.16 164-0.06103 0.89549 0.98067-0.34233 0.22275 0.12268
   5   8   1   -5.54    8.15 164-0.05697 0.98856 0.98087 0.24301 0.22725 0.33722
  -2   0   1 1411.90    2.43 166-0.03788-0.23103 0.98142-0.99008 0.24842-0.22508
  -2   4   9   21.52    8.94 165-0.04690 0.16123 0.98123-0.26086 0.23849 0.90318
   0   1   6   12.16    8.10 165-0.04567 0.30890 0.98126-0.71761 0.23985 0.55010
   0   2   7   30.59    7.85 164-0.05765 0.37530 0.98081-0.55512 0.22660 0.71162
   0   8   8   14.25    6.53 165-0.05352 0.49201 0.98100 0.31271 0.23118 0.97096
   0  10   7   20.60    4.95 165-0.04679 0.47095 0.98123 0.57492 0.23861 0.88132
   1   1   5  149.97    7.33 164-0.05628 0.43331 0.98088-0.72276 0.22811 0.48391
   1   3   7  -21.01    9.43 165-0.05421 0.54304 0.98097-0.39957 0.23042 0.77982
   4   5   4   37.21   12.08 165-0.04920 0.91051 0.98115-0.13492 0.23595 0.59426
   4   6   4   35.83    9.69 165-0.05658 0.93165 0.98086 0.00769 0.22779 0.62456
   4   7   4   28.67   10.42 165-0.05178 0.93542 0.98106 0.14762 0.23310 0.63861
   4   9   3  -15.25    7.60 165-0.04808 0.92137 0.98119 0.40633 0.23719 0.54720
   4  10   2    2.00    5.73 165-0.04590 0.88761 0.98125 0.53004 0.23959 0.44610
   5   9   0   -6.14    6.03 166-0.04177 0.95058 0.98135 0.36664 0.24414 0.21699
  -5   2   7   16.07    1.68 171 0.02654-0.49392 0.97888-0.62779 0.31818 0.36619
  -3   2   8   -1.33    5.33 166-0.03177-0.07985 0.98147-0.58025 0.25514 0.66097
  -2   2   8   10.09    7.14 166-0.03824 0.08418 0.98141-0.56447 0.24804 0.71419
  -2   8   9   31.91    5.94 166-0.03948 0.20586 0.98139 0.30262 0.24667 0.98105
  -1   5   9   17.78    9.79 167-0.03114 0.31791 0.98147-0.10403 0.25582 0.96470
  -1   6   9    0.57    7.63 165-0.04357 0.34079 0.98130 0.03587 0.24217 0.99179
   1   0   1  464.03    3.76 166-0.03313 0.23468 0.98146-0.94525 0.25365-0.07477
   1   0   2  206.12    5.40 166-0.03650 0.27954 0.98143-0.92453 0.24995 0.05711
   1   9   7   34.47    6.57 166-0.03640 0.60387 0.98143 0.44618 0.25006 0.89825
   2   1   4   30.61    9.13 166-0.03540 0.52588 0.98145-0.72923 0.25115 0.38126
   2   6   7    4.26   11.20 167-0.03156 0.71895 0.98147 0.04079 0.25536 0.88087
   2   9   6   16.93    6.06 166-0.04107 0.72345 0.98136 0.44215 0.24493 0.82717
   3  10   4   -2.95    5.81 167-0.03142 0.80572 0.98147 0.56250 0.25552 0.63976
   4   2   0 1585.92    7.37 166-0.03876 0.69379 0.98140-0.63792 0.24746 0.00288
   4   3   3   -2.82   10.44 166-0.03487 0.82780 0.98145-0.43717 0.25173 0.40433
   5   4   1    0.22    8.53 166-0.03385 0.91049 0.98146-0.32522 0.25285 0.22275
   5   6   2   21.92    8.64 165-0.04258 0.98806 0.98133-0.02111 0.24326 0.40273
   5   7   2    4.26    9.20 166-0.03686 0.99483 0.98143 0.12133 0.24955 0.41898
  -2   1   7   17.99    5.68 167-0.02224 0.01287 0.98146-0.72583 0.26545 0.54807
  -1   7   9   -0.61    6.73 167-0.02911 0.34608 0.98150 0.18061 0.25795 0.99958
   0   0   4  114.61    4.92 166-0.03110 0.19895 0.98149-0.89917 0.25577 0.25471
   0   3   8   33.05    8.78 167-0.02807 0.40156 0.98150-0.39462 0.25908 0.82870
   1   5   8   30.84   11.46 168-0.01824 0.57628 0.98140-0.09569 0.26981 0.91994
   1   6   8   18.55   10.52 166-0.02701 0.59426 0.98149 0.04408 0.26024 0.94487
   2   5   7    1.64    9.98 166-0.03174 0.70259 0.98149-0.10210 0.25506 0.85371
   2   7   7   20.83    9.98 167-0.02506 0.72073 0.98148 0.17778 0.26238 0.88989
   3   1   0   -4.28    4.75 167-0.02503 0.50851 0.98148-0.79617 0.26241-0.08537
   3   1   1  270.15    5.45 166-0.02916 0.55507 0.98150-0.77517 0.25788 0.04609
   3   2   4   30.64    9.15 166-0.02927 0.69154 0.98150-0.57335 0.25777 0.45177
   3   5   6    2.65   12.40 167-0.02021 0.80610 0.98143-0.10785 0.26767 0.76454
   3   6   6  329.85   12.14 167-0.02574 0.82133 0.98149 0.03376 0.26163 0.79411
   3   9   5   -6.61    7.30 167-0.02191 0.82003 0.98145 0.43662 0.26581 0.73021
   3  11   3   -2.03    4.32 167-0.02476 0.76620 0.98148 0.67786 0.26270 0.52337
   4   2  -1   29.27    4.20 167-0.01995 0.63213 0.98143-0.66240 0.26795-0.14443
   4   2   1  521.20    6.58 167-0.02769 0.72325 0.98149-0.61857 0.25950 0.11861
   4   4   4  179.97   10.50 166-0.02776 0.87166 0.98149-0.27725 0.25942 0.54650
   4   8   4   15.46    9.11 167-0.02584 0.92321 0.98149 0.28825 0.26152 0.63310
   5   5   2   10.88    8.45 166-0.02927 0.96320 0.98150-0.16040 0.25777 0.36642
  -3   1   7   84.28    4.33 168-0.00300-0.16060 0.98096-0.73973 0.28616 0.47673
  -3   3   9  -15.62    6.51 169-0.00133-0.05534 0.98089-0.41748 0.28797 0.77855
  -1   1   7   -3.37    7.33 168-0.00379 0.15106 0.98099-0.71081 0.28531 0.57963
  -1   2   8   -8.10    8.66 167-0.01471 0.21572 0.98135-0.54801 0.27347 0.73720
  -1   4   9   25.55    8.33 168-0.01554 0.28619 0.98137-0.24643 0.27257 0.91676
   1   0   3  171.40    6.74 168-0.01003 0.29245 0.98122-0.90452 0.27855 0.15441
   1   7   8   31.10    9.34 168-0.00596 0.59133 0.98108 0.18908 0.28296 0.95468
   2   4   7  -10.94   10.52 168-0.01365 0.67233 0.98133-0.24435 0.27462 0.80809
   3   1   2  186.29    7.69 168-0.01015 0.57813 0.98123-0.75402 0.27842 0.15403
   3   7   6  -10.76    8.51 167-0.01471 0.82542 0.98135 0.17367 0.27347 0.80213
   5   5  -4   -2.51    1.82 175 0.07947 0.61008 0.97169-0.27411 0.37368-0.51829
   5   8   2   -5.37    8.18 169-0.00481 0.98219 0.98104 0.26555 0.28421 0.40989
   5   9   1   -9.52    6.16 168-0.00833 0.95537 0.98117 0.37967 0.28039 0.29964
  -2   0   5  227.65    3.86 169 0.00812-0.11155 0.98040-0.90717 0.29795 0.23905
  -2   3   9  -26.77    8.35 169 0.00354 0.10116 0.98066-0.39918 0.29301 0.82776
  -1   0   5   -4.95    4.26 169-0.00150 0.05224 0.98091-0.89228 0.28757 0.30179
  -1   8   9   -0.03    6.04 168-0.00117 0.32377 0.98090 0.31657 0.28793 0.98717
   0   9   8  -10.22    4.74 169-0.00273 0.46175 0.98097 0.45691 0.28624 0.93870
   1   2   7  -23.90   11.03 169 0.00596 0.46840 0.98053-0.53966 0.29563 0.69437
   1   4   8   31.35    9.92 168-0.00185 0.54540 0.98093-0.23772 0.28720 0.87570
   2   8   7   -4.84    7.54 168-0.00117 0.70688 0.98090 0.31768 0.28793 0.88200
   3   4   6  141.65   11.14 168-0.00098 0.77160 0.98089-0.24869 0.28814 0.72196
   4   2   2  178.80    7.22 168-0.00146 0.73737 0.98091-0.59900 0.28761 0.21865
   5   4  -3   31.32    2.84 170 0.02370 0.69170 0.97923-0.40158 0.31466-0.35048
   5   4   2   -7.56    9.72 169 0.00077 0.91852 0.98081-0.30104 0.29003 0.31082
   5   6   3   85.22   10.51 169 0.00816 0.97878 0.98040 0.00074 0.29800 0.47788
  -4   3   9  -10.55    4.75 169 0.01198-0.22273 0.98012-0.42965 0.30220 0.70186
   0   5   9   37.68    8.94 170 0.01235 0.42782 0.98010-0.08978 0.30259 0.95968
   0   6   9    0.61    7.90 170 0.01069 0.44913 0.98021 0.05396 0.30080 0.98433
   1   1   6    3.87    7.79 170 0.01466 0.40476 0.97993-0.70092 0.30507 0.53454
   1   8   8  -17.36    7.11 170 0.01877 0.58274 0.97962 0.33050 0.30948 0.94142
   3   1   3  230.03    9.10 170 0.02150 0.58672 0.97939-0.73234 0.31239 0.24890
   3   8   6   -4.07    7.96 170 0.01768 0.81518 0.97970 0.31795 0.30830 0.78977
   4   3   4  216.57    9.74 170 0.01433 0.81691 0.97996-0.41577 0.30471 0.47829
   4   5   5   15.24   10.00 169 0.01217 0.88800 0.98011-0.11255 0.30239 0.65227
   4   6   5    9.75    9.01 170 0.01182 0.90654 0.98013 0.02977 0.30202 0.67956
   4   7   5   -1.84    9.70 169 0.01271 0.90765 0.98007 0.16668 0.30297 0.69169
   4   9   4    3.60    6.52 170 0.02158 0.89121 0.97939 0.43227 0.31248 0.60635
   4  10   3   -1.32    5.08 170 0.02072 0.86396 0.97946 0.55343 0.31156 0.50238
   5   3   0  104.64    6.77 170 0.01679 0.80713 0.97977-0.48218 0.30735 0.01672
   5   5   3   15.96   10.95 169 0.01491 0.95749 0.97991-0.13855 0.30533 0.44477
   5   7   3   33.50    9.17 170 0.01850 0.98372 0.97964 0.14446 0.30918 0.48815
  -3   5  10    7.80    6.62 170 0.02849-0.01641 0.97873-0.11285 0.31986 0.91053
  -3   6  10  120.52    6.06 171 0.03007-0.00710 0.97857 0.03020 0.32155 0.93775
  -1   3   9   -8.54    8.17 171 0.02610 0.23105 0.97895-0.38550 0.31732 0.84837
   0   0   5   92.95    5.74 171 0.02725 0.18125 0.97885-0.87601 0.31855 0.31896
   0   1   7  258.36    9.22 171 0.03327 0.27081 0.97825-0.69207 0.32495 0.59136
   0   2   8   48.41   10.25 171 0.03442 0.32584 0.97813-0.53235 0.32617 0.74153
   0   4   9   52.31   10.79 171 0.02883 0.39796 0.97870-0.22990 0.32023 0.91585
   0   7   9   -8.34    6.66 171 0.02513 0.44895 0.97904 0.19679 0.31628 0.99048
   1   0   4   22.80    7.26 171 0.02837 0.29313 0.97874-0.88187 0.31974 0.23971
   1   3   8   95.38   12.05 171 0.03135 0.49783 0.97845-0.37653 0.32291 0.81414
   1  10   7    5.87    4.01 172 0.03756 0.54469 0.97779 0.59542 0.32950 0.84449
   2   1   5   25.27    8.46 171 0.02454 0.51059 0.97909-0.70607 0.31566 0.44775
   2   3   7   51.00   10.14 170 0.02308 0.61921 0.97922-0.38677 0.31409 0.74746
   2  10   6   -0.76    4.11 171 0.02653 0.67002 0.97891 0.58652 0.31778 0.77773
   3   1  -1    9.82    3.04 171 0.03596 0.40645 0.97796-0.81332 0.32781-0.27983
   4   2   3    9.47    9.74 171 0.03309 0.74262 0.97827-0.57716 0.32475 0.30683
   4   4   5  114.58   12.66 171 0.03321 0.85277 0.97826-0.25346 0.32488 0.60851
   5   3  -1  108.98    5.18 171 0.02685 0.75571 0.97888-0.50225 0.31812-0.12079
   5   3   1   -3.47    7.99 171 0.02783 0.83691 0.97879-0.46070 0.31916 0.13147
  -3   7  10   11.18    4.99 172 0.04464-0.00636 0.97693 0.17154 0.33714 0.94284
  -2   5  10  151.58    8.29 172 0.04376 0.12254 0.97704-0.09400 0.33622 0.95012
  -2   6  10    4.03    6.80 171 0.04144 0.14034 0.97732 0.04560 0.33376 0.97662
   3   3   6   55.12   10.88 171 0.03564 0.72325 0.97797-0.39201 0.32761 0.65562
   3  10   5   12.11    4.72 172 0.04443 0.76595 0.97695 0.58158 0.33692 0.68065
   4   2  -2    3.92    3.21 173 0.05516 0.51431 0.97554-0.67673 0.34823-0.35163
   4   8   5  -12.74    7.68 172 0.04616 0.89684 0.97674 0.31102 0.33875 0.67692
   5   4   3   52.86   11.02 171 0.04008 0.91722 0.97747-0.27928 0.33232 0.39515
   5   8   3   18.11    7.66 172 0.04774 0.96894 0.97654 0.28781 0.34042 0.48066
   5   9   2    6.09    5.82 171 0.03855 0.94713 0.97765 0.40652 0.33070 0.38421
   6   6  -1   35.89    5.74 172 0.04648 0.93260 0.97670-0.06294 0.33909-0.02295
   6   6   0   30.91    8.30 172 0.04797 0.96841 0.97651-0.04292 0.34066 0.10118
   6   7  -1   -1.59    6.10 172 0.04809 0.94373 0.97649 0.07985 0.34078-0.00351
  -2   7  10   -5.71    5.51 174 0.06521 0.13052 0.97402 0.19183 0.35893 0.97899
  -1   9   9    4.27    4.24 173 0.06214 0.27474 0.97449 0.46658 0.35571 0.94660
   0   8   9  -10.10    5.67 174 0.06521 0.41751 0.97402 0.34343 0.35893 0.97725
   2   0   2  139.85    6.96 173 0.05899 0.33832 0.97497-0.90484 0.35241 0.00581
   2   5   8    7.35    9.42 173 0.05425 0.65816 0.97565-0.07606 0.34743 0.88917
   2   6   8   -4.86    7.98 173 0.05329 0.67210 0.97578 0.06491 0.34642 0.91246
   2   9   7   -2.97    4.45 172 0.05187 0.67087 0.97598 0.46644 0.34492 0.85304
   3   5   7   20.07   11.45 173 0.05855 0.77064 0.97503-0.08072 0.35195 0.80993
   3   6   7   -7.97    9.81 172 0.05187 0.78515 0.97598 0.05752 0.34492 0.83326
   5   3   2   10.22    7.54 173 0.05302 0.85372 0.97582-0.43759 0.34613 0.23240
   6   6  -2    4.12    4.93 174 0.06988 0.87010 0.97326-0.07910 0.36381-0.17380
   6   7  -2   32.23    4.67 173 0.06164 0.88755 0.97457 0.06081 0.35519-0.14484
   6   7   0   -1.31    6.72 173 0.05713 0.97577 0.97524 0.10156 0.35046 0.11436
  -3   4  10    6.68    6.47 173 0.06669-0.06817 0.97378-0.24814 0.36052 0.85218
  -2   2   9   13.45    7.55 174 0.07076 0.01611 0.97311-0.53483 0.36478 0.72356
  -2   4  10  -32.23    7.89 174 0.07103 0.08969 0.97306-0.22899 0.36505 0.90352
  -1   0   6  109.65    5.98 174 0.06811 0.02646 0.97355-0.86503 0.36201 0.35345
  -1   5  10   -1.11    8.58 174 0.07339 0.25160 0.97266-0.07651 0.36752 0.97015
  -1   6  10  -29.61    7.35 174 0.07236 0.27204 0.97284 0.06788 0.36644 0.99436
   0   3   9   -2.41    8.96 173 0.06518 0.34764 0.97402-0.36564 0.35894 0.85497
   1   5   9  -57.05   10.00 174 0.07228 0.52896 0.97285-0.06686 0.36636 0.94404
   1   6   9  -17.76    9.04 174 0.07254 0.54246 0.97281 0.07458 0.36663 0.96611
   1   9   8   19.17    4.70 174 0.07330 0.53679 0.97268 0.47907 0.36742 0.91056
   2   0   3   20.35    7.72 174 0.07204 0.36675 0.97289-0.88289 0.36611 0.11915
   2   4   8   28.03   11.94 173 0.06638 0.62888 0.97383-0.21728 0.36020 0.84859
   2   7   8   14.57    7.96 173 0.06634 0.67044 0.97383 0.20685 0.36015 0.91871
   3   1   4   21.71    8.64 174 0.06518 0.58767 0.97402-0.70835 0.35894 0.33244
   3   4   7   12.58   12.21 174 0.06950 0.74093 0.97332-0.22105 0.36346 0.76947
   3   7   7   31.46    8.48 173 0.06709 0.78375 0.97371 0.20064 0.36094 0.84111
   3   9   6    6.46    4.85 173 0.06218 0.77623 0.97449 0.46292 0.35579 0.76659
   4   3   5   61.30   12.27 174 0.06872 0.80359 0.97345-0.38894 0.36265 0.54683
   5   3  -2   16.74    3.85 175 0.08121 0.65978 0.97127-0.51628 0.37565-0.30750
   5   5   4   60.91   11.01 174 0.07052 0.94628 0.97315-0.11504 0.36453 0.51568
   5   6   4   22.46    8.85 173 0.06372 0.96459 0.97425 0.02627 0.35741 0.54515
   6   5  -1   -6.24    5.61 174 0.07214 0.88918 0.97288-0.20461 0.36621-0.08009
   6   5   0    7.34    7.20 173 0.06647 0.93640 0.97381-0.17983 0.36029 0.05878
   6   6   1   21.56    8.03 173 0.06880 0.98780 0.97344-0.01910 0.36273 0.20613
   6   8  -1   23.21    5.11 174 0.07890 0.92509 0.97169 0.22485 0.37325-0.01167
  -3   2   9   22.71    6.13 176 0.09050-0.15853 0.96945-0.54680 0.38547 0.65587
  -2   0   6    3.57    3.99 175 0.08543-0.14909 0.97045-0.87758 0.38022 0.28240
  -2   1   8    6.77    6.11 175 0.08077-0.04800 0.97133-0.69646 0.37539 0.56513
  -1   1   8   21.36    7.90 175 0.08530 0.10533 0.97047-0.68050 0.38009 0.61100
  -1   2   9    3.08    9.27 174 0.07833 0.16340 0.97177-0.51708 0.37285 0.75956
   0   0   6  323.72    7.98 175 0.08699 0.16285 0.97014-0.84625 0.38184 0.38370
   1   0   0   30.86    1.44 175 0.07942 0.08199 0.97158-0.95645 0.37399-0.32062
   1   0   5    3.69    6.64 174 0.07714 0.28784 0.97199-0.85523 0.37162 0.31801
   1   1   7    4.57   10.53 174 0.07833 0.37934 0.97177-0.66978 0.37285 0.58817
   1   2   8   39.01   11.28 175 0.08280 0.43103 0.97095-0.50842 0.37750 0.73722
   2   0   1 1272.38    5.45 174 0.07489 0.28319 0.97239-0.92157 0.36928-0.13903
   2   1   6    8.37   11.98 176 0.08918 0.49179 0.96971-0.67854 0.38410 0.51253
   2   2   7  180.69   10.45 174 0.07508 0.55525 0.97235-0.51783 0.36947 0.67101
   4   2   4   23.82    9.33 174 0.07566 0.74319 0.97225-0.55010 0.37008 0.39051
   4   5   6   34.11    9.87 174 0.07862 0.86157 0.97172-0.08569 0.37316 0.70766
   4   6   6   -5.64    8.18 174 0.07833 0.87658 0.97177 0.05688 0.37285 0.73227
   5   3   3   27.65   10.82 175 0.08675 0.86064 0.97019-0.41305 0.38159 0.32408
   5   7   4   31.96    7.53 174 0.07650 0.96648 0.97210 0.17147 0.37096 0.55353
   6   5   1   -2.54    8.47 176 0.09163 0.96096 0.96922-0.15455 0.38664 0.16166
   6   7   1   82.71    7.49 175 0.08067 0.99276 0.97135 0.12419 0.37529 0.21896
   6   8   0   -2.00    5.86 175 0.08566 0.95769 0.97040 0.24602 0.38046 0.10673
  -1   4  10   -5.10    8.63 176 0.09285 0.21866 0.96901-0.21352 0.38798 0.92719
  -1   7  10   17.58    5.53 175 0.09191 0.26049 0.96920 0.20955 0.38701 0.99631
   0   1  -2  810.71    2.61 176 0.09412-0.15898 0.96875-0.86854 0.38929-0.62249
   1   4   9   -1.18    9.15 175 0.08884 0.49475 0.96982-0.20565 0.38384 0.90638
   1   7   9   41.68    6.14 175 0.09096 0.53056 0.96940 0.21760 0.38603 0.97271
   2   0   4   19.36    8.67 176 0.10076 0.38041 0.96733-0.85722 0.39613 0.21788
   4   4   6  186.59   12.61 176 0.09658 0.82995 0.96823-0.22282 0.39183 0.66993
   4   7   6  -13.21    7.23 176 0.09276 0.87854 0.96903 0.19913 0.38789 0.73503
   4   9   5    6.52    5.21 175 0.09468 0.85599 0.96863 0.46147 0.38987 0.65412
   5   4   4  -17.44    9.65 176 0.09078 0.91263 0.96943-0.25213 0.38584 0.46649
   5   9   3    8.61    5.20 175 0.09438 0.93038 0.96870 0.43548 0.38956 0.45127
   6   5  -2   -2.61    4.32 177 0.10555 0.81781 0.96627-0.21332 0.40105-0.23666
  -3   1   8   -0.53    4.54 177 0.10882-0.23212 0.96548-0.70241 0.40429 0.48283
  -2   3  10   29.49    7.70 177 0.11588 0.02751 0.96380-0.36508 0.41152 0.83042
   0   1   8   55.31    9.46 177 0.11166 0.23420 0.96482-0.65900 0.40720 0.63366
   2   3   8   16.08   10.42 176 0.10136 0.58339 0.96717-0.35137 0.39664 0.79424
   2   8   8    1.50    4.81 177 0.10370 0.65472 0.96665 0.35777 0.39904 0.90283
   3   3   7  526.88   11.70 176 0.10417 0.69519 0.96654-0.35504 0.39953 0.71594
   3   8   7   -1.46    5.34 176 0.10246 0.76423 0.96693 0.35011 0.39777 0.82975
   4   1   1  107.85    5.83 176 0.10355 0.57833 0.96668-0.74654 0.39889-0.04401
   4   1   2  202.78    6.96 177 0.10555 0.61611 0.96624-0.72609 0.40094 0.08063
   5   2   1   69.44    7.71 177 0.11399 0.73724 0.96426-0.58834 0.40958 0.02064
   5   8   4    5.80    6.63 177 0.10665 0.94798 0.96598 0.31866 0.40207 0.54446
   6   4   0   29.52    7.23 177 0.11519 0.87958 0.96397-0.31265 0.41081-0.01085
   6   5   2  -13.53    9.40 176 0.10841 0.97442 0.96558-0.13123 0.40388 0.26841
   6   6   2   33.15    8.34 176 0.10649 0.99627 0.96602 0.00966 0.40191 0.29633
   6   8   1   -3.41    6.18 177 0.11593 0.97200 0.96379 0.27459 0.41156 0.20396
   0   2   9    0.13   10.50 178 0.12432 0.27738 0.96161-0.49520 0.42012 0.77630
   0   5  10    5.06    7.48 178 0.11839 0.36391 0.96312-0.05215 0.41410 0.97563
   0   6  10    3.40    7.08 178 0.12046 0.37493 0.96260 0.08959 0.41621 0.99586
   1   3   9   19.85    9.44 177 0.11902 0.45098 0.96296-0.34004 0.41473 0.85121
   4   1   0   46.99    5.65 178 0.12562 0.51347 0.96127-0.76198 0.42145-0.19399
   4   1   3   46.80    9.58 178 0.12360 0.63891 0.96180-0.70097 0.41939 0.19061
   4   2   5   63.66   12.81 178 0.12204 0.73656 0.96220-0.52155 0.41781 0.46680
   4   8   6   33.82    6.23 178 0.12627 0.85483 0.96110 0.34803 0.42211 0.72928
   5   2   0  368.50    6.64 178 0.12151 0.68904 0.96233-0.60525 0.41728-0.11542
   5   2   2    2.29    9.21 177 0.12145 0.76815 0.96235-0.56465 0.41721 0.13738
   5   5   5   -0.47   10.87 178 0.12256 0.93063 0.96206-0.08093 0.41834 0.58526
   5   6   5   91.66    9.36 178 0.12518 0.94461 0.96139 0.05952 0.42100 0.61020
   6   4   1   11.25    8.54 177 0.11849 0.91424 0.96309-0.28965 0.41420 0.10992
   6   7   2   10.68    7.17 177 0.11732 0.99783 0.96338 0.15332 0.41300 0.30775
  -1   3  10   69.22    7.60 178 0.13143 0.16828 0.95959-0.34574 0.42753 0.86558
   1   0   6   78.46    7.36 178 0.12801 0.27955 0.96051-0.82229 0.42407 0.39396
   1   8   9    9.10    4.29 178 0.12859 0.50693 0.96035 0.36689 0.42465 0.95622
   4   3   6   -2.04   10.57 178 0.12882 0.78755 0.96029-0.35503 0.42489 0.61313
   5   3   4   93.62    9.87 178 0.12751 0.86039 0.96064-0.38399 0.42356 0.41123
   3  -3  -6   66.12    4.64   3 0.23568-0.04943 0.48591-0.98975-0.66079-0.01852
   4   1   0   20.33    6.13   3 0.23136 0.40694 0.48809-0.28986-0.66163 0.88702
   5  -1  -2  121.08    9.53   3 0.23078 0.45661 0.48838-0.60024-0.66175 0.63703
   6  -2  -5   28.43    9.04   2 0.22356 0.48170 0.49198-0.78946-0.66311 0.28745
   7  -1 -11   13.96    8.57   3 0.23310 0.39437 0.48722-0.75386-0.66130-0.41007
   8   2  -4  105.19    9.52   2 0.22318 0.89020 0.49217-0.17855-0.66318 0.60368
   9   2 -12   17.79    5.63   3 0.22643 0.71237 0.49055-0.32435-0.66257-0.36545
   9   3  -6    1.24    8.83   3 0.22286 0.97863 0.49233-0.06388-0.66324 0.42390
   9   4 -13   -0.51    3.15   2 0.22000 0.70187 0.49374-0.06539-0.66376-0.44503
   9   4 -13    5.53    1.94   2 0.22451 0.69934 0.49151-0.06211-0.66293-0.44837
   9   4  -6   -1.82    7.56   3 0.22343 0.99081 0.49205 0.07793-0.66313 0.44602
   9   6  -7   75.75    6.42   2 0.22783 0.96770 0.48986 0.34021-0.66231 0.36019
   3  -3  -7  -18.14    4.08   5 0.25513-0.11855 0.47559-0.99937-0.65682-0.14797
   3  -3  -5   91.16    5.32   4 0.24554-0.01830 0.48056-0.96442-0.65885 0.10500
   3  -2  -2  326.25    5.88   3 0.23837 0.12362 0.48423-0.76594-0.66030 0.51089
   3   0   0   95.89    4.82   3 0.23621 0.23228 0.48532-0.44443-0.66073 0.81235
   4  -3  -7  404.00    6.72   4 0.24873 0.05177 0.47892-0.98958-0.65818-0.10137
   4  -3  -6   33.90    6.83   4 0.24598 0.09536 0.48034-0.97319-0.65876 0.02804
   6  -2 -10   51.99    7.87   4 0.25264 0.24989 0.47689-0.87910-0.65736-0.35886
   6   0  -2  -16.09    7.97   4 0.24126 0.61394 0.48276-0.43852-0.65972 0.70793
   7   6  -3    0.36    5.84   3 0.23950 0.80604 0.48365 0.40025-0.66008 0.76647
   8  -1  -9   63.12   10.83   4 0.24757 0.62014 0.47951-0.69188-0.65843-0.10734
   8  -1  -8   13.08    9.63   4 0.24182 0.66712 0.48247-0.67336-0.65961 0.02217
   8   0  -5  131.62   13.27   4 0.24638 0.79845 0.48013-0.46932-0.65867 0.42681
   8   5  -4  265.36    8.05   3 0.24023 0.91264 0.48328 0.25043-0.65993 0.66751
   9   1 -11    1.29    6.75   4 0.24069 0.72685 0.48304-0.43893-0.65983-0.26435
   9   1  -7  -28.37    9.95   4 0.23759 0.89436 0.48462-0.36309-0.66046 0.24484
   9   2  -6   15.24    9.47   3 0.23752 0.94905 0.48466-0.19593-0.66047 0.39769
   9   3 -13    2.02    4.41   4 0.24837 0.66348 0.47910-0.19370-0.65826-0.47711
   9   5  -6  -12.85    7.81   4 0.24654 0.98176 0.48005 0.22832-0.65864 0.45860
   4  -3  -5   29.70    7.23   5 0.26076 0.12183 0.47265-0.94368-0.65554 0.15264
   5  -2  -3  149.75    8.02   5 0.25728 0.37541 0.47448-0.74542-0.65630 0.48240
   5   0  -1   24.56    6.66   4 0.25394 0.48634 0.47623-0.42558-0.65702 0.78386
   6  -1 -12   -8.41    4.93   5 0.26069 0.16096 0.47269-0.78162-0.65555-0.59528
   6   3  -1   40.87    6.62   5 0.25956 0.67658 0.47328 0.01398-0.65580 0.90126
   7  -2  -8   22.31    9.22   4 0.25455 0.48283 0.47591-0.82181-0.65689-0.05355
   7  -2  -7   -4.56    9.74   5 0.25611 0.51943 0.47510-0.80300-0.65655 0.07359
   7   0  -3   -8.22   11.41   5 0.26227 0.71018 0.47186-0.43310-0.65520 0.62795
   7   3  -2   11.04    8.25   5 0.26266 0.78711 0.47165 0.01090-0.65511 0.82196
   8  -1  -7    4.72   10.42   4 0.25257 0.69877 0.47694-0.64799-0.65731 0.14738
   8   0 -12   18.12    6.70   5 0.26458 0.49090 0.47063-0.60226-0.65468-0.47007
   8   1 -13    3.78    5.17   4 0.25365 0.47400 0.47638-0.48776-0.65708-0.57296
   8   1  -4   30.89    9.96   4 0.25461 0.84426 0.47588-0.30281-0.65687 0.57541
   1  -2  -2  416.81    2.85   6 0.28049-0.23075 0.46212-0.77395-0.65086 0.39882
   2  -3  -6   -2.68    2.86   8 0.30522-0.27964 0.44839-0.97230-0.64461-0.09079
   2  -3  -5  129.96    3.33   7 0.28598-0.21476 0.45912-0.95845-0.64953 0.04456
   3  -3  -4  159.14    5.93   6 0.28216-0.01520 0.46121-0.92446-0.65046 0.22339
   4  -3  -8   -4.95    5.78   7 0.28348-0.03190 0.46049-0.99335-0.65014-0.23437
   4  -1  -1   52.65    6.45   5 0.26670 0.30447 0.46954-0.57582-0.65408 0.70656
   5  -3  -7  359.87    8.48   6 0.27433 0.18349 0.46545-0.96195-0.65233-0.05688
   5  -3  -6   -3.92    8.35   6 0.27604 0.22072 0.46453-0.94150-0.65192 0.07107
   6  -2  -4   78.70    9.69   5 0.26935 0.48039 0.46813-0.74496-0.65348 0.40310
   6   2  -1    7.77    6.22   6 0.27037 0.65423 0.46758-0.11975-0.65325 0.87618
   6   4  -1   -3.32    5.44   6 0.28053 0.67002 0.46210 0.16806-0.65085 0.91951
   7  -2  -9  -10.39    9.84   6 0.27501 0.41903 0.46508-0.83845-0.65217-0.18802
   7  -2  -6   -4.58   11.82   6 0.27418 0.54836 0.46553-0.77128-0.65236 0.19635
   7   0 -13    0.66    5.17   6 0.27969 0.27819 0.46256-0.62968-0.65106-0.65235
   7   2  -2  -20.18    9.08   6 0.27627 0.76545 0.46440-0.12472-0.65187 0.79648
   7   4  -2    5.59    7.09   7 0.28337 0.78300 0.46055 0.16346-0.65017 0.84231
   8  -1 -10   24.27    8.29   5 0.26806 0.55964 0.46881-0.70137-0.65377-0.23685
   8  -1  -6   30.78   12.89   6 0.27579 0.71695 0.46467-0.61507-0.65198 0.26956
   9   0 -10    6.14    9.56   7 0.28167 0.71608 0.46147-0.53960-0.65058-0.16970
   9   0  -9   43.71    8.62   5 0.26756 0.76968 0.46908-0.52496-0.65389-0.03887
   9   0  -8   -4.56    9.49   6 0.27001 0.80439 0.46777-0.50888-0.65333 0.08692
   9   1  -6  -18.59    9.81   6 0.27001 0.90202 0.46777-0.32569-0.65333 0.36444
   9   3  -5   -1.85    9.89   6 0.27787 0.96171 0.46354-0.01819-0.65149 0.53414
  10   3 -10   -5.58    5.54   6 0.27054 0.91714 0.46749-0.11379-0.65321-0.05247
  10   3  -9   20.61    7.77   7 0.27880 0.95941 0.46304-0.08138-0.65127 0.07791
  10   4 -11   -2.09    4.95   6 0.27787 0.88493 0.46354 0.01764-0.65149-0.15357
  10   4 -10   56.08    5.26   5 0.26593 0.93688 0.46995 0.03020-0.65426-0.02685
  10   4  -9   75.04    5.85   5 0.27009 0.97392 0.46773 0.05355-0.65331 0.10126
  -1   1   0  706.48    2.14   7 0.28413-0.42839 0.46004-0.33728-0.64996 0.62002
   4  -3  -4  115.85    7.70   7 0.29566 0.12823 0.45367-0.90248-0.64708 0.27091
   4  -2  -2   -6.05    6.74   6 0.28215 0.23592 0.46112-0.72753-0.65044 0.55270
   5  -3  -8  165.25    7.74   7 0.29337 0.12287 0.45495-0.97154-0.64767-0.18851
   5  -3  -5  116.27    9.03   7 0.29508 0.24408 0.45400-0.90904-0.64723 0.19464
   9   0  -7   18.77    9.89   6 0.28448 0.83302 0.45985-0.47423-0.64988 0.21311
   9   1 -12    7.69    5.34   7 0.28432 0.64249 0.45994-0.43784-0.64992-0.40281
   9   2 -13   -2.98    4.58   7 0.29077 0.60165 0.45639-0.32122-0.64832-0.51427
   9   2  -5   97.36   10.83   7 0.29259 0.93726 0.45538-0.14877-0.64786 0.51304
   9   4  -5  -13.76    8.60   7 0.29057 0.96697 0.45650 0.13046-0.64837 0.55448
  10   2 -10   17.68    6.99   7 0.29188 0.88440 0.45578-0.23636-0.64804-0.07495
  10   2  -9   -0.60    8.19   7 0.29303 0.92709 0.45513-0.21545-0.64775 0.05214
  10   3 -11   -0.49    4.61   7 0.28524 0.86131 0.45943-0.12650-0.64969-0.18312
  10   3  -8    3.16    8.42   7 0.29368 0.98408 0.45477-0.05317-0.64759 0.20233
  10   4  -8   38.52    7.17   7 0.29266 0.99449 0.45534 0.08461-0.64785 0.22348
  10   5 -11    7.42    4.05   7 0.29488 0.88225 0.45411 0.16769-0.64728-0.13582
  10   5 -10    3.02    4.24   6 0.28189 0.93504 0.46126 0.18114-0.65051-0.00397
  10   5  -9   84.63    5.60   7 0.29144 0.96713 0.45602 0.20505-0.64815 0.11740
   0   3   1   60.05    1.38   9 0.31550-0.23826 0.44228-0.00169-0.64186 0.83510
   3  -3  -8   15.88    3.56   9 0.32552-0.22269 0.43647-0.98532-0.63904-0.30064
   5  -2 -11   -3.53    4.87   8 0.30981-0.00679 0.44554-0.88366-0.64341-0.55318
   5   2   0  459.05    6.58   8 0.30750 0.50091 0.44685-0.09626-0.64403 0.94291
   5   3   0  141.79    5.05   7 0.29997 0.52141 0.45111 0.04050-0.64602 0.96718
   6   1  -1   91.30    8.43   8 0.30182 0.60915 0.45007-0.24559-0.64554 0.84380
   7  -2 -10    9.00    8.24   8 0.30685 0.35074 0.44722-0.83607-0.64421-0.32318
   7  -2  -5   31.33   12.44   8 0.30596 0.55994 0.44773-0.73364-0.64445 0.31657
   7  -1 -12    7.86    5.83   8 0.31008 0.27805 0.44539-0.73531-0.64334-0.55726
   7   1  -2    8.55    9.94   8 0.30537 0.72284 0.44806-0.24854-0.64460 0.76785
   8  -1 -11  -27.66    8.07   8 0.30690 0.47190 0.44720-0.70613-0.64419-0.37809
   8   0  -4    2.07   10.20   7 0.29882 0.78540 0.45175-0.41888-0.64632 0.54010
   8   2  -3  257.87   10.83   8 0.30837 0.84730 0.44636-0.11574-0.64380 0.71181
   8   3  -3   46.35    9.51   7 0.30115 0.86757 0.45045 0.02259-0.64571 0.73617
   8   6  -4   11.84    5.94   8 0.30640 0.85723 0.44748 0.42955-0.64433 0.67569
   9   0 -11    8.82    7.50   9 0.31173 0.64566 0.44444-0.54508-0.64289-0.30644
   9   6  -6   42.63    5.45   7 0.29950 0.94000 0.45137 0.39729-0.64614 0.47311
  10   2  -8  -20.48    9.58   8 0.30684 0.95552 0.44723-0.18804-0.64421 0.17568
   0  -1  -1  249.60    0.77  12 0.36188-0.41568 0.41427-0.58071-0.62782 0.47448
   2  -3  -4  309.61    3.88   9 0.31844-0.20555 0.44029-0.92012-0.64097 0.16108
   3   2   1  169.95    3.60   9 0.32768 0.20808 0.43491-0.09186-0.63834 0.96285
   4   0   0  -25.23    5.62   9 0.31345 0.31433 0.44317-0.38590-0.64234 0.84567
   6  -3  -7  -32.51    9.36   9 0.31929 0.29001 0.43980-0.92682-0.64073-0.01704
   6  -3  -6   26.55    9.90   9 0.32502 0.33055 0.43646-0.90033-0.63911 0.10996
   6  -2 -11    6.20    6.07  10 0.33162 0.12918 0.43258-0.85987-0.63719-0.51171
   6  -1  -2   29.49   11.02  10 0.32439 0.52466 0.43683-0.53861-0.63929 0.66782
   8  -1  -5    6.51   11.29   8 0.31231 0.72214 0.44382-0.57510-0.64266 0.38745
   8   4  -3  126.07    8.02   9 0.31615 0.86459 0.44161 0.17145-0.64160 0.75480
   9   0  -6   92.14    9.96   8 0.31496 0.84473 0.44230-0.43935-0.64193 0.33191
   9   1  -5   64.60   11.63   9 0.31760 0.89829 0.44078-0.27600-0.64120 0.48108
   9   5  -5    0.43    7.10  10 0.32779 0.94361 0.43484 0.29548-0.63831 0.57238
  10   2 -11    9.19    5.09   9 0.31323 0.82540 0.44329-0.24732-0.64240-0.20953
  10   3 -12    8.29    4.10   9 0.32323 0.78793 0.43751-0.12103-0.63962-0.31841
  10   3  -7   37.18    8.72   9 0.32437 0.99392 0.43684-0.01898-0.63929 0.32155
  10   5  -8   31.70    5.44   9 0.31996 0.98252 0.43941 0.24167-0.64054 0.24022
   2  -3  -7   15.69    2.39  12 0.36353-0.37513 0.41301-0.95676-0.62733-0.23388
   5  -3  -9   35.55    6.76  11 0.34186 0.03333 0.42625-0.96676-0.63419-0.33029
   5  -3  -4   -8.18    9.04  11 0.34203 0.24337 0.42615-0.86998-0.63414 0.30879
   6  -3  -8  397.31    8.13   9 0.32801 0.24599 0.43448-0.93757-0.63830-0.14811
   7   5  -2    4.86    5.32  10 0.33734 0.74224 0.42895 0.33447-0.63555 0.85101
   8  -2  -8    2.35   10.82  10 0.33237 0.56397 0.43191-0.76545-0.63703-0.02399
   8   1  -3  134.48   11.44  10 0.33106 0.81026 0.43268-0.24259-0.63741 0.68219
  10   1 -10   -7.86    7.43  10 0.33742 0.83293 0.42891-0.35471-0.63553-0.11297
  10   1  -9   -7.21    7.18  10 0.32781 0.87655 0.43459-0.34494-0.63836 0.01563
  10   1  -8  -11.04    9.57  11 0.34203 0.91262 0.42615-0.31127-0.63414 0.14258
  10   2  -7   38.17    9.38  10 0.33087 0.96981 0.43279-0.15552-0.63747 0.29662
  10   4  -7   33.33    7.21  10 0.33013 0.99917 0.43323 0.12717-0.63768 0.34273
  -1  -1  -3   29.47    1.49  11 0.35615-0.64820 0.41757-0.63800-0.62978 0.17218
  -1   0  -1  471.14    1.83  11 0.34566-0.54334 0.42397-0.46362-0.63308 0.45136
   2   1   1   16.05    2.79  11 0.34688 0.02071 0.42324-0.23406-0.63270 0.88507
   3  -3  -3   43.59    5.32  10 0.34228-0.03356 0.42601-0.86834-0.63411 0.33622
   4  -3  -9  -11.47    4.41  12 0.35537-0.14494 0.41806-0.97330-0.63003-0.38326
   4  -3  -3  361.31    8.36  11 0.35214 0.11381 0.42004-0.84982-0.63106 0.38225
   5  -2  -2  151.65    8.21  10 0.33901 0.33638 0.42797-0.68209-0.63511 0.58781
   5  -1  -1   38.75    7.34  10 0.33951 0.39027 0.42767-0.52088-0.63496 0.73807
   5   1   0   17.23    5.55  10 0.34074 0.45453 0.42694-0.21749-0.63458 0.91092
   6  -3  -5    7.62    8.44  11 0.34531 0.35073 0.42418-0.86669-0.63319 0.23058
   6   0  -1   -0.48    9.05  11 0.35358 0.54684 0.41915-0.35621-0.63060 0.80839
   7   0  -2   17.85   10.83  11 0.34752 0.66607 0.42285-0.36585-0.63250 0.73158
   8  -2  -9    8.05    9.85  10 0.34258 0.51242 0.42583-0.77992-0.63402-0.15444
   8  -2  -7   -6.80    9.67  11 0.34193 0.59995 0.42622-0.74315-0.63422 0.10019
   8   0 -13   -3.71    5.04  11 0.35361 0.36273 0.41914-0.57527-0.63059-0.62373
   9  -1  -9    8.66    8.05  10 0.34070 0.68574 0.42696-0.62810-0.63460-0.08129
   9  -1  -8    7.66    9.01  10 0.33808 0.72900 0.42853-0.60859-0.63539 0.04740
   9  -1  -7  257.90   12.26  11 0.35073 0.75845 0.42090-0.58124-0.63150 0.17211
   9   1 -13   18.02    4.48  11 0.35409 0.53100 0.41884-0.42095-0.63044-0.55112
  10   2 -12    1.89    4.56  10 0.34540 0.74864 0.42413-0.24910-0.63316-0.34531
   1   4   1  114.08    1.36  15 0.40749-0.16075 0.38472 0.21319-0.61188 0.87796
   2  -1   0    2.32    5.11  12 0.36096-0.06062 0.41461-0.52727-0.62828 0.70648
   3  -2  -1   25.70    7.09  12 0.36537 0.03892 0.41187-0.67462-0.62683 0.60706
   6  -3  -9 1017.24    9.23  12 0.36172 0.17313 0.41413-0.93889-0.62803-0.28511
   7  -2 -11   -6.80    6.52  12 0.36453 0.24387 0.41239-0.82717-0.62711-0.46806
   8  -2  -6    6.44   10.27  11 0.35618 0.62406 0.41756-0.71121-0.62982 0.22349
   8  -1  -4   17.39   13.19  11 0.35618 0.71438 0.41756-0.52693-0.62982 0.49987
   8   5  -3  -19.32    6.19  12 0.36368 0.83296 0.41292 0.33978-0.62739 0.75927
   9  -1 -10   15.94    7.35  11 0.35662 0.62773 0.41729-0.63850-0.62968-0.21391
   9   0 -12   -1.38    5.53  12 0.36193 0.54686 0.41401-0.54409-0.62797-0.45391
   9   0  -5    2.61   10.19  11 0.35618 0.84513 0.41756-0.39398-0.62982 0.44675
   9   2  -4   21.44   10.31  11 0.35688 0.91147 0.41712-0.09265-0.62960 0.62040
   9   3  -4   72.20    7.86  11 0.35560 0.92715 0.41792 0.04645-0.63001 0.64437
  10   1 -11   16.27    5.25  12 0.35658 0.77105 0.41731-0.36341-0.62970-0.24492
  10   1  -7  -21.12    9.44  12 0.35857 0.93130 0.41609-0.27937-0.62906 0.26465
  10   5  -7    3.65    5.49  11 0.35831 0.98032 0.41624 0.28380-0.62914 0.35554
   2  -3  -3   22.46    4.29  13 0.38141-0.22951 0.40155-0.85839-0.62143 0.27215
   2  -2  -1  300.17    5.67  13 0.37593-0.12837 0.40504-0.68227-0.62333 0.55073
   3  -1   0  103.56    5.50  12 0.36804 0.08877 0.41002-0.51230-0.62600 0.75378
   3   1   1  312.89    4.45  13 0.38295 0.13914 0.40057-0.19924-0.62089 0.92286
   3   4   1   13.51    1.40  15 0.40476 0.15535 0.38634 0.23881-0.61296 0.98127
   7  -3  -8   45.61    9.96  13 0.37801 0.35216 0.40372-0.89472-0.62261-0.11214
   7  -3  -7   -4.51    8.88  13 0.37111 0.39350 0.40809-0.88077-0.62497 0.01768
   8  -2 -10   11.60    8.41  13 0.37636 0.44114 0.40477-0.78382-0.62318-0.29581
   8  -1 -12   33.82    5.54  12 0.37294 0.37610 0.40694-0.68232-0.62435-0.52223
   8   0  -3  117.46    9.65  12 0.37030 0.75899 0.40860-0.36027-0.62524 0.64703
   9  -1  -6   -1.09   11.88  13 0.37838 0.77659 0.40348-0.54542-0.62248 0.29014
   9   1  -4   33.39   11.11  13 0.37630 0.87856 0.40481-0.22304-0.62320 0.59056
   9   4  -4  117.87    8.12  12 0.37253 0.92174 0.40719 0.19972-0.62449 0.65980
  10   0  -9   -1.24    8.76  13 0.37778 0.81924 0.40387-0.45090-0.62269-0.02008
  10   2  -6   60.44    9.47  13 0.37460 0.97200 0.40589-0.10893-0.62378 0.41005
  10   3  -6    0.22    7.17  13 0.36878 0.98996 0.40955 0.02371-0.62575 0.42959
  10   4  -6  -15.14    6.76  13 0.37894 0.98873 0.40313 0.17074-0.62229 0.44727
   4  -2  -1   32.05    6.84  13 0.38490 0.17528 0.39928-0.64513-0.62023 0.65019
   5  -3  -3   55.04    7.78  13 0.38415 0.23751 0.39976-0.81551-0.62050 0.42260
   5   0   0   28.66    7.89  14 0.39080 0.39091 0.39547-0.32770-0.61813 0.87024
   6  -3  -4   14.32    8.90  13 0.38164 0.35625 0.40137-0.82384-0.62138 0.34639
   7  -3  -6   12.78    9.60  13 0.38095 0.43308 0.40181-0.84989-0.62162 0.14577
   8  -2  -5    0.09   10.58  13 0.38402 0.63572 0.39985-0.67191-0.62055 0.34126
   9  -1 -11    4.41    6.77  15 0.39795 0.54943 0.39079-0.63659-0.61552-0.35843
   9   6  -5   10.02    5.14  15 0.39805 0.88174 0.39073 0.47828-0.61549 0.56966
  10   0 -10    8.16    6.09  13 0.38409 0.76878 0.39980-0.46635-0.62052-0.14927
  10   0  -8    7.76    7.53  13 0.38112 0.85597 0.40171-0.42782-0.62156 0.10669
  10   1  -6    6.75   10.03  14 0.39580 0.93858 0.39220-0.23673-0.61631 0.38015
   4  -1   0  151.16    7.57  15 0.40526 0.20753 0.38593-0.47287-0.61294 0.79313
   7  -3  -9   94.31    8.44  15 0.40155 0.28911 0.38839-0.89981-0.61434-0.24712
   7  -3  -5   -3.21   11.57  15 0.40463 0.44560 0.38635-0.81797-0.61318 0.26092
   7  -1  -2  -17.28   11.58  16 0.41160 0.59719 0.38170-0.47054-0.61052 0.69126
   7   2  -1   24.80    7.06  14 0.39779 0.68172 0.39087-0.03798-0.61573 0.88650
   7   3  -1   27.73    6.99  15 0.40290 0.68873 0.38750 0.11016-0.61383 0.90690
   8   2  -2  101.51    9.50  15 0.40600 0.78875 0.38544-0.03691-0.61266 0.80792
  10   0  -7  -12.08    8.27  15 0.39835 0.87691 0.39050-0.40161-0.61552 0.22476
  10   1 -12   -2.68    4.14  15 0.39720 0.68177 0.39126-0.36614-0.61595-0.39261
   3  -3  -2   -8.40    6.83  16 0.42075-0.07023 0.37555-0.79871-0.60697 0.43542
   4   2   1  630.12    4.82  16 0.41933 0.27189 0.37652-0.02007-0.60753 0.98274
   5  -3 -10   -6.40    4.79  17 0.42457-0.09816 0.37294-0.93517-0.60544-0.48682
   6  -3 -10   28.06    6.02  16 0.42172 0.07171 0.37489-0.92189-0.60658-0.43408
   6  -1  -1   38.20    8.31  15 0.41206 0.47338 0.38143-0.46115-0.61037 0.76244
   7   1  -1   -6.16    9.34  16 0.41370 0.65462 0.38032-0.16354-0.60973 0.85920
   8  -2 -11    7.45    6.21  16 0.42348 0.35170 0.37368-0.77195-0.60588-0.43971
   8   1  -2   90.53   10.69  16 0.42008 0.76147 0.37601-0.16865-0.60723 0.78019
   8   3  -2    4.67    7.96  15 0.41157 0.79648 0.38176 0.11045-0.61056 0.82804
   9  -2  -8   17.99   10.13  16 0.42107 0.63879 0.37533-0.70123-0.60684-0.00581
   9  -1  -5  -19.66    9.87  16 0.41083 0.77932 0.38226-0.50662-0.61084 0.40376
   9   0  -4   28.99    9.76  16 0.41183 0.83396 0.38158-0.34003-0.61046 0.55541
   9   5  -4  -13.00    5.86  16 0.42388 0.88357 0.37341 0.37372-0.60572 0.66394
  10   0 -11    3.80    4.85  15 0.41226 0.70091 0.38130-0.46952-0.61029-0.28841
  10   5  -6   -6.30    5.63  18 0.43881 0.95320 0.36306 0.36099-0.59959 0.45523
  11   3 -10   14.18    4.30  16 0.41626 0.93100 0.37860-0.00877-0.60874-0.04253
  11   3  -9   13.69    4.97  16 0.41975 0.96911 0.37623 0.01379-0.60737 0.08247
   3  -3  -9    1.69    2.67  20 0.46921-0.40965 0.34148-0.90982-0.58634-0.48283
   4  -3  -2   41.65    6.74  16 0.42319 0.08445 0.37417-0.78426-0.60614 0.48542
   5  -4  -6   18.04    7.65  17 0.43693 0.05265 0.36467-0.98277-0.60052-0.00031
   5  -2  -1    0.25    9.82  18 0.43621 0.28637 0.36517-0.60313-0.60082 0.68501
   6  -3  -3  237.44   11.96  17 0.43109 0.34899 0.36873-0.77000-0.60294 0.45807
   6   2   0   -9.91    6.52  17 0.42965 0.54049 0.36972-0.00566-0.60353 0.95442
   6   3   0   15.21    6.03  17 0.43898 0.53871 0.36323 0.14106-0.59966 0.97104
   8  -3  -7    1.46   10.63  17 0.43066 0.49435 0.36903-0.82254-0.60312 0.04636
   8  -2  -4   49.19   11.20  17 0.42762 0.63358 0.37113-0.62492-0.60436 0.45469
   8  -1  -3  139.01   10.52  16 0.42240 0.69381 0.37471-0.46973-0.60645 0.60790
   9  -2  -9   13.35    7.69  16 0.42428 0.59030 0.37343-0.71658-0.60570-0.13416
   9  -2  -7   29.58    9.22  17 0.42460 0.67344 0.37321-0.67730-0.60558 0.12364
  10   0  -6   58.63    8.65  16 0.42581 0.89142 0.37238-0.35681-0.60509 0.34373
  10   2  -5   25.43    7.72  16 0.42504 0.96023 0.37291-0.05551-0.60540 0.51789
  10   3  -5   23.56    7.86  17 0.43093 0.97070 0.36884 0.09050-0.60300 0.53946
  11   2 -10    9.04    4.68  18 0.43476 0.90611 0.36618-0.13732-0.60142-0.07595
  11   2  -9   10.13    5.61  17 0.42971 0.94914 0.36968-0.12012-0.60350 0.05509
  11   4  -9   18.23    4.24  17 0.43553 0.96721 0.36564 0.16622-0.60111 0.09795
   0  -2  -5   38.18    1.08  23 0.50874-0.73843 0.31154-0.70024-0.56692-0.11830
   4  -4  -6  -20.29    5.73  18 0.44431-0.11952 0.35968-0.99213-0.59738-0.05521
   4  -4  -5    4.89    6.56  19 0.45175-0.08022 0.35438-0.97196-0.59416 0.06677
   4   1   1  110.21    5.34  18 0.44129 0.23788 0.36181-0.14725-0.59866 0.95103
   5  -4  -7   -5.90    7.02  19 0.45175-0.00618 0.35438-0.99667-0.59416-0.13846
   5  -4  -5  -10.08    8.48  18 0.44498 0.07840 0.35920-0.95712-0.59709 0.12240
   6   1   0   13.32    6.36  17 0.43845 0.51413 0.36381-0.14049-0.59986 0.92624
   7  -3 -10   40.93    6.90  18 0.44562 0.20135 0.35875-0.88948-0.59682-0.39314
   7  -3  -4    1.72    9.82  17 0.43833 0.45558 0.36390-0.77212-0.59991 0.37516
   7   0  -1    5.73   10.01  18 0.44441 0.61060 0.35961-0.28391-0.59734 0.82360
   7   4  -1    6.13    5.20  17 0.43929 0.66328 0.36322 0.27548-0.59951 0.91395
   8  -3  -8    4.74    8.23  18 0.43775 0.44934 0.36430-0.84235-0.60016-0.08518
   8  -3  -6   38.47   11.66  18 0.44801 0.52241 0.35705-0.79557-0.59579 0.16790
   8   4  -2  -14.70    6.44  18 0.44513 0.77926 0.35910 0.27165-0.59703 0.83400
   9  -2 -10   -2.57    7.56  19 0.45175 0.52397 0.35438-0.72022-0.59416-0.27509
   9  -2  -6   -2.52    9.82  18 0.43953 0.69354 0.36305-0.64718-0.59941 0.24163
   9   2  -3   54.34    8.40  17 0.43822 0.87294 0.36397-0.02105-0.59996 0.71712
   9   3  -3   54.61    7.96  18 0.44485 0.87727 0.35929 0.12531-0.59715 0.73744
  10  -1  -9   54.83    7.10  17 0.43702 0.74726 0.36481-0.55266-0.60046-0.06330
  10  -1  -8   43.76    7.67  17 0.43670 0.78798 0.36504-0.53292-0.60059 0.06404
  10   1  -5  -19.46    8.14  18 0.43905 0.93227 0.36339-0.19163-0.59961 0.48625
  11   2 -11    6.42    3.69  18 0.44549 0.84709 0.35884-0.14938-0.59687-0.20724
  11   2  -8   27.08    6.19  18 0.44338 0.97670 0.36033-0.08981-0.59777 0.17739
  11   3  -8   -6.86    4.40  18 0.43848 0.99113 0.36379 0.04171-0.59985 0.19726
   1  -1   0  775.51    3.02  18 0.45057-0.30665 0.35534-0.48670-0.59486 0.62036
   3   0   1   33.71    5.46  19 0.45578 0.05507 0.35160-0.29198-0.59257 0.87178
   4  -4  -7   65.43    5.82  20 0.46794-0.17633 0.34273-0.99594-0.58708-0.19418
   5  -3  -2   18.38    8.15  19 0.45079 0.21426 0.35519-0.75246-0.59476 0.52567
   5  -1   0  103.97    8.50  19 0.45705 0.31335 0.35068-0.42570-0.59200 0.82272
   6  -4  -7   -3.85    8.68  19 0.45856 0.13696 0.34959-0.97480-0.59133-0.08876
   6  -4  -6   77.64    9.34  19 0.45631 0.18845 0.35122-0.95491-0.59233 0.04208
   8  -3  -9  120.95    8.62  18 0.45231 0.39220 0.35410-0.84956-0.59410-0.21750
   8   0  -2    0.36    9.48  18 0.44868 0.72221 0.35670-0.28777-0.59568 0.74488
   9  -1 -12    3.92    4.74  20 0.45975 0.44562 0.34873-0.61332-0.59080-0.51425
   9  -1  -4   95.98   12.30  19 0.45667 0.77682 0.35096-0.44992-0.59217 0.51572
   9   1  -3  277.74    9.12  18 0.44947 0.84864 0.35613-0.15337-0.59534 0.69126
  10  -1 -10    9.42    5.60  18 0.45117 0.69039 0.35492-0.56260-0.59459-0.20005
  10  -1  -7    2.32    8.47  19 0.44997 0.81337 0.35577-0.50838-0.59512 0.18117
  10   0 -12   10.57    4.34  19 0.46212 0.60983 0.34700-0.45459-0.58973-0.43866
  10   4  -5   -1.18    6.03  19 0.45244 0.95827 0.35400 0.24581-0.59404 0.55129
  11   1 -10    0.50    4.85  20 0.46267 0.86599 0.34660-0.25908-0.58948-0.11146
  11   1  -9    6.29    4.82  18 0.45134 0.91290 0.35480-0.24625-0.59452 0.02333
  11   1  -8   21.44    6.82  19 0.45728 0.94441 0.35052-0.22086-0.59190 0.14913
  11   4  -8  -13.09    4.49  19 0.45788 0.98503 0.35008 0.19688-0.59163 0.20937
   1  -3  -5  228.26    1.64  24 0.52693-0.61071 0.29725-0.81341-0.55765-0.09868
   2  -3  -2    3.76    4.96  20 0.47175-0.27789 0.34009-0.77958-0.58558 0.36385
   2   0   1 1268.03    4.41  19 0.46479-0.11170 0.34522-0.30009-0.58878 0.81630
   4  -4  -4    9.24    5.82  19 0.46473-0.05269 0.34527-0.93544-0.58881 0.19081
   5  -4  -4  -24.29    8.92  20 0.47059 0.09514 0.34095-0.91918-0.58612 0.23902
   6  -4  -5  -32.87    9.73  20 0.47038 0.21035 0.34111-0.92769-0.58622 0.16112
   6   0   0  180.37    8.86  20 0.47067 0.46790 0.34089-0.26039-0.58608 0.88986
   8  -3  -5    6.92   10.34  20 0.46809 0.54168 0.34280-0.75789-0.58728 0.28549
   9  -2  -5   36.37   11.82  19 0.46684 0.70849 0.34372-0.60170-0.58785 0.36011
   9   4  -3   51.21    7.12  20 0.47807 0.85612 0.33539 0.29094-0.58262 0.74438
  10  -1  -6   21.77   10.39  20 0.47491 0.83460 0.33775-0.46509-0.58411 0.30089
  10   0  -5    8.60    8.65  19 0.46473 0.89191 0.34527-0.30911-0.58881 0.45413
  11   2  -7    1.87    6.57  20 0.47161 0.99059 0.34019-0.04949-0.58565 0.29205
  11   3  -7   -2.52    5.71  21 0.47571 0.99990 0.33715 0.09507-0.58373 0.31289
   1  -3  -4   88.76    1.97  23 0.50599-0.54880 0.31396-0.80887-0.56911 0.04127
   1  -2  -1 1519.07    4.28  21 0.48318-0.39183 0.33153-0.62421-0.58048 0.45617
   3  -4  -5   14.56    4.50  21 0.48391-0.26832 0.33097-0.95610-0.58013 0.00348
   4   0   1  101.81    6.62  21 0.48684 0.17937 0.32875-0.25512-0.57871 0.90868
   5  -4  -8   48.05    5.82  21 0.48401-0.07785 0.33089-0.99106-0.58008-0.27918
   6  -4  -8  243.45    7.83  21 0.48244 0.08263 0.33208-0.97693-0.58084-0.22575
   6  -2  -1    8.94   11.81  22 0.49083 0.39076 0.32571-0.55150-0.57676 0.71321
   7  -3  -3   51.84   13.50  21 0.48583 0.44975 0.32952-0.71884-0.57920 0.48390
   8  -2  -3   61.76   11.08  20 0.47870 0.62320 0.33490-0.56993-0.58263 0.55766
   9   0  -3    0.06    9.34  20 0.47430 0.81166 0.33818-0.27606-0.58470 0.65592
  10  -1 -11   -8.46    5.25  20 0.47782 0.61849 0.33555-0.56057-0.58304-0.33771
  11   1 -11    2.22    3.83  20 0.47675 0.80347 0.33636-0.26791-0.58355-0.24399
  11   1  -7    5.86    7.27  20 0.47957 0.96298 0.33424-0.18442-0.58221 0.26485
   2   4   1    0.07    0.93  30 0.59440-0.19248 0.23867 0.37198-0.51687 0.83301
   3  -4  -6   -5.30    4.25  23 0.50372-0.33052 0.31559-0.96364-0.57035-0.13576
   3  -4  -4   14.24    5.32  22 0.49607-0.24011 0.32153-0.92565-0.57422 0.12530
   3  -2   0  -46.62    5.89  22 0.49076-0.04544 0.32562-0.56557-0.57686 0.68497
   4  -2   0   31.39    8.32  22 0.49610 0.10407 0.32151-0.55000-0.57421 0.73022
   6  -4  -4    0.03   10.17  23 0.50305 0.22777 0.31611-0.88898-0.57069 0.27393
   7  -4  -7  103.78    8.27  21 0.49035 0.27031 0.32593-0.93565-0.57706-0.05151
   7  -4  -6  -10.87    8.80  22 0.49133 0.30301 0.32518-0.91726-0.57658 0.07364
   7  -1  -1   17.97    8.96  21 0.48874 0.55261 0.32716-0.39503-0.57785 0.78114
   8  -3 -10   17.01    6.53  21 0.49042 0.31476 0.32587-0.84216-0.57703-0.36231
   8  -1  -2  -26.22    9.97  21 0.48909 0.66896 0.32689-0.39971-0.57768 0.70365
   9  -2 -11    9.27    5.43  22 0.49333 0.43939 0.32364-0.70714-0.57559-0.42226
  10   1  -4   14.56    9.41  21 0.49219 0.91600 0.32452-0.12818-0.57615 0.58968
  10   2  -4    0.94    7.08  22 0.49007 0.93710 0.32614 0.00622-0.57720 0.61196
  10   3  -4    7.43    7.07  21 0.49064 0.93684 0.32571 0.15015-0.57692 0.63258
  11   0 -10    7.70    4.91  22 0.49707 0.81244 0.32076-0.37291-0.57372-0.14930
  11   0  -9   -8.72    5.12  22 0.48944 0.85918 0.32663-0.36596-0.57751-0.02221
  11   0  -8   47.85    5.87  21 0.49154 0.89964 0.32502-0.33622-0.57647 0.11062
  11   4  -7   -0.05    4.56  23 0.50350 0.98467 0.31576 0.25789-0.57046 0.32114
   3  -3  -1   -4.65    7.36  24 0.51343-0.12060 0.30796-0.71392-0.56587 0.52355
   4  -4  -3   -1.07    6.29  23 0.50340-0.04926 0.31588-0.88740-0.57108 0.30025
   4  -3  -1   15.62    7.16  22 0.50269 0.04597 0.31644-0.70590-0.57145 0.57857
   5  -4  -3   -3.91    9.24  23 0.50886 0.09928 0.31159-0.87038-0.56827 0.34861
   5   1   1   88.66    6.36  23 0.50831 0.32690 0.31203-0.08539-0.56855 0.97015
   5   2   1   92.13    4.97  23 0.50653 0.34110 0.31343 0.05411-0.56948 0.99425
   7  -4  -8  300.86    8.85  23 0.50640 0.21476 0.31353-0.94454-0.56954-0.18727
   7  -4  -5   -7.97   11.36  24 0.51610 0.33170 0.30584-0.88643-0.56446 0.18892
   8  -3  -4   60.79   10.57  22 0.50242 0.54871 0.31664-0.71243-0.57158 0.39833
   9  -3  -8   23.76    7.97  23 0.50312 0.54078 0.31610-0.77969-0.57123-0.06495
   9  -3  -7   11.52    8.54  23 0.50340 0.58204 0.31588-0.75961-0.57108 0.06287
   9  -2  -4   28.58   11.93  23 0.50675 0.71074 0.31325-0.55285-0.56936 0.46603
   9  -1  -3   33.63   11.85  23 0.50924 0.76141 0.31129-0.39247-0.56807 0.61353
  10  -2  -9   38.14    7.52  23 0.50608 0.66352 0.31378-0.64184-0.56970-0.12111
  10  -2  -8   -8.09    7.51  23 0.50208 0.70509 0.31691-0.63161-0.57176 0.00482
  10  -2  -7   41.97    9.48  23 0.50803 0.74476 0.31224-0.60020-0.56870 0.13355
  10  -1  -5   -0.79    8.95  22 0.50340 0.84033 0.31588-0.42089-0.57108 0.41242
  11   0  -7    5.42    7.56  23 0.51178 0.92346 0.30928-0.30184-0.56674 0.22622
  11   2  -6   18.50    6.70  24 0.51610 0.99187 0.30584 0.00029-0.56446 0.39622
  -1   1  -1 2236.51    3.99  24 0.52431-0.71057 0.29905-0.19792-0.56029 0.40102
   4  -4  -8   21.01    4.12  25 0.52838-0.27844 0.29574-0.96954-0.55806-0.35209
   4   4   1    1.20    1.79  25 0.53266 0.18120 0.29224 0.34450-0.55569 0.97023
   5  -3  -1   86.94   10.56  24 0.52055 0.18580 0.30209-0.67681-0.56232 0.61983
   6  -4  -9  107.65    6.74  24 0.52885-0.00532 0.29536-0.96054-0.55780-0.37802
   6  -1   0   66.98    7.85  23 0.51491 0.41084 0.30660-0.36853-0.56533 0.84486
   7  -3 -11   16.20    5.26  24 0.52492 0.08290 0.29855-0.84877-0.55995-0.55921
   8   1  -1   71.35    9.70  24 0.51871 0.70468 0.30357-0.07587-0.56331 0.86141
   8   2  -1  -11.26    8.17  23 0.51605 0.71877 0.30569 0.06443-0.56472 0.88337
   9  -3  -9    7.61    6.73  23 0.51652 0.48550 0.30533-0.78852-0.56448-0.19993
   9  -3  -6   30.89    9.24  24 0.51527 0.61109 0.30632-0.72988-0.56514 0.18424
  10   0  -4  -11.75    8.47  23 0.51605 0.88285 0.30569-0.25079-0.56473 0.55577
  11   0 -11    5.45    4.23  24 0.52441 0.74378 0.29897-0.37133-0.56023-0.29222
  11   1  -6   39.91    6.47  23 0.51607 0.97035 0.30568-0.13675-0.56471 0.37374
  11   3  -6    2.21    5.32  23 0.51605 0.99358 0.30569 0.14501-0.56473 0.41747
  -1   0  -2  140.87    1.72  25 0.53362-0.77244 0.29163-0.35084-0.55540 0.24721
   1  -3  -3    5.26    2.73  26 0.54680-0.55035 0.28065-0.75201-0.54789 0.14753
   1   3   1  177.17    1.29  29 0.58650-0.35267 0.24590 0.20998-0.52334 0.76644
   2  -2   0  462.33    5.28  24 0.52747-0.23912 0.29668-0.55389-0.55881 0.61312
   3  -4  -3  107.91    6.13  25 0.53225-0.23354 0.29276-0.87827-0.55617 0.23559
   3  -1   1   19.03    6.52  25 0.53506-0.03837 0.29045-0.37258-0.55460 0.80957
   5  -2   0  -30.59    7.79  25 0.52679 0.23109 0.29723-0.51338-0.55918 0.76598
   5   0   1   16.81    7.17  25 0.53323 0.29004 0.29196-0.20384-0.55562 0.93436
   6  -4  -3   60.58    8.99  24 0.52913 0.23341 0.29532-0.83662-0.55789 0.38763
   7  -4  -9   22.46    7.57  25 0.54098 0.13764 0.28553-0.93688-0.55124-0.33565
   7  -4  -4   -2.40   11.54  24 0.53018 0.35048 0.29446-0.84262-0.55732 0.30759
   7   1   0   40.53    8.34  25 0.53087 0.57715 0.29390-0.05873-0.55693 0.93003
   7   2   0   63.43    7.17  25 0.53358 0.58587 0.29166 0.08430-0.55542 0.95193
   8  -4  -7   28.98    9.72  25 0.53554 0.38029 0.29005-0.88784-0.55433-0.02808
   8   0  -1   14.35   10.71  25 0.53608 0.67621 0.28960-0.20131-0.55402 0.82904
   8   3  -1    7.12    7.38  26 0.54102 0.70741 0.28550 0.22674-0.55122 0.89322
   9  -3  -5  -12.61   11.82  25 0.53548 0.62533 0.29010-0.69475-0.55436 0.29814
   9   1  -2  175.76    8.51  24 0.52869 0.80879 0.29568-0.07261-0.55813 0.77578
   9   2  -2  140.59    8.40  24 0.52893 0.82095 0.29548 0.06960-0.55800 0.79885
  10  -2 -10    5.31    5.17  24 0.52800 0.60229 0.29624-0.64356-0.55852-0.26072
  10  -2  -6   10.04    8.30  24 0.52651 0.76744 0.29745-0.56543-0.55933 0.24965
  10   4  -4  -17.18    5.62  26 0.54130 0.90957 0.28526 0.33464-0.55106 0.63210
   3  -4  -7   11.22    3.39  27 0.55773-0.42327 0.27128-0.93841-0.54141-0.29172
   4  -1   1   69.83    6.02  25 0.54122 0.11225 0.28529-0.35179-0.55109 0.85615
   5  -4  -9    9.42    4.73  27 0.55789-0.19315 0.27114-0.95339-0.54131-0.44842
   7  -2  -1   -5.67    9.81  26 0.54067 0.48685 0.28575-0.49555-0.55140 0.72965
   7   0   0   53.77    9.43  26 0.54644 0.54720 0.28090-0.18740-0.54808 0.89804
   8  -4  -8  -15.84    8.47  26 0.54667 0.32164 0.28071-0.90279-0.54794-0.16413
   8  -4  -6   72.56    9.03  25 0.53923 0.41825 0.28694-0.86427-0.55222 0.09967
   8  -3  -3    5.93   13.23  27 0.55310 0.54847 0.27525-0.65823-0.54417 0.49982
   8  -2  -2   48.53   10.47  25 0.53897 0.60502 0.28716-0.50148-0.55236 0.65587
   9  -3 -10    0.82    5.97  26 0.54936 0.41186 0.27844-0.78200-0.54638-0.34670
   9   0  -2  710.66   11.71  26 0.54578 0.78062 0.28146-0.19792-0.54846 0.74582
   9   3  -2  119.36    7.75  26 0.55097 0.81100 0.27706 0.22904-0.54543 0.80917
  11  -1  -9   11.33    5.04  25 0.53811 0.80243 0.28788-0.46008-0.55286-0.06644
  11  -1  -8   -6.95    5.62  26 0.53938 0.83930 0.28682-0.44660-0.55214 0.05624
  11   0  -6   -3.58    6.67  26 0.54088 0.93617 0.28557-0.25824-0.55128 0.33720
   2  -3  -1   -0.15    5.73  26 0.55454-0.31976 0.27409-0.68586-0.54335 0.44810
   4  -4  -2   80.66    6.96  26 0.55170-0.05587 0.27652-0.82604-0.54504 0.40284
   5  -4  -2   27.23    8.07  27 0.55408 0.09693 0.27448-0.81094-0.54363 0.44952
   7   3   0   13.38    6.01  27 0.56240 0.56940 0.26731 0.24993-0.53862 0.95668
   8  -4  -5   30.00    9.50  26 0.55325 0.44386 0.27519-0.83132-0.54412 0.21821
   8  -3 -11    0.82    4.81  28 0.56203 0.20255 0.26763-0.80702-0.53884-0.53417
   9  -2  -3  -21.99   12.25  27 0.55804 0.70289 0.27108-0.49596-0.54126 0.56541
  10  -2  -5    0.55    8.29  27 0.55392 0.77721 0.27461-0.52723-0.54372 0.35900
  10  -1  -4   54.32    9.00  26 0.54996 0.83638 0.27799-0.36580-0.54606 0.51795
  11  -1 -10    7.02    4.24  26 0.55250 0.74603 0.27584-0.46933-0.54457-0.20148
  11  -1  -7    8.11    6.36  26 0.55000 0.87158 0.27796-0.41170-0.54604 0.18126
  11   1  -5   -0.47    7.29  27 0.56031 0.96622 0.26912-0.08013-0.53989 0.47492
  11   2  -5   50.54    6.21  27 0.56163 0.97968 0.26798 0.06198-0.53909 0.49836
   0  -2  -4    3.28    0.87  32 0.62107-0.81057 0.21330-0.57821-0.49941-0.05685
   2  -1   1  359.12    5.66  28 0.57096-0.22915 0.25975-0.35578-0.53334 0.73889
   5  -1   1  274.29    8.55  28 0.57310 0.23745 0.25786-0.31071-0.53200 0.88890
   6  -2   0   -2.36    8.75  28 0.56651 0.34769 0.26367-0.46476-0.53611 0.79261
   7  -4  -3    9.07    9.58  27 0.56488 0.35639 0.26510-0.79274-0.53711 0.41478
   8  -4  -9    2.33    6.99  29 0.57676 0.25814 0.25461-0.89580-0.52968-0.30967
   8  -1  -1   25.21    9.20  27 0.56446 0.63205 0.26546-0.31869-0.53737 0.79011
   9  -3  -4    8.23   11.78  28 0.57118 0.63919 0.25956-0.64419-0.53321 0.40776
   9  -1  -2    1.26   11.31  28 0.57289 0.74026 0.25805-0.31767-0.53213 0.70573
  10  -2 -11    6.97    4.57  28 0.56997 0.51769 0.26063-0.62881-0.53396-0.41408
  10   1  -3   10.88    7.66  28 0.56483 0.89057 0.26514-0.04930-0.53715 0.67898
  10   2  -3   10.62    7.36  29 0.57380 0.90068 0.25724 0.10124-0.53156 0.69908
  11  -1  -6   11.70    7.96  28 0.57084 0.88941 0.25987-0.37250-0.53342 0.29583
   3  -4  -2   82.12    5.68  28 0.57744-0.24030 0.25421-0.81641-0.52938 0.33623
   6  -4  -2  423.33   10.53  28 0.57670 0.23057 0.25487-0.77822-0.52984 0.48722
   6   1   1  -17.31    6.74  29 0.58134 0.41295 0.25071-0.00951-0.52687 0.97983
   6   2   1   93.41    6.37  29 0.58977 0.41422 0.24306 0.14000-0.52135 0.99471
   7  -1   0   22.62    8.52  28 0.57709 0.50568 0.25452-0.30071-0.52960 0.85845
   8  -4  -4    6.67   10.20  28 0.57670 0.45968 0.25487-0.78906-0.52984 0.32998
  10  -3  -8   23.41    6.61  28 0.57527 0.62428 0.25614-0.70617-0.53075-0.05607
  10  -3  -7   24.89    7.57  28 0.57584 0.66516 0.25564-0.68477-0.53040 0.07218
  10   0  -3    3.96    8.30  29 0.57682 0.86531 0.25477-0.17983-0.52977 0.64849
  11   0  -5   45.97    6.73  28 0.57685 0.93746 0.25474-0.20745-0.52975 0.44372
  11   3  -5  -10.74    4.94  28 0.57670 0.97262 0.25487 0.21609-0.52984 0.50852
   1   0   1  500.98    2.59  30 0.59526-0.39817 0.23834-0.20760-0.51776 0.69471
   2  -4  -4   -3.50    3.66  29 0.58852-0.48721 0.24453-0.85743-0.52225 0.02343
   4  -3   0  348.17    7.90  29 0.58655 0.00281 0.24633-0.61559-0.52355 0.65789
   5  -5  -6   -2.43    6.74  30 0.59436-0.12597 0.23917-0.99711-0.51836-0.10843
   5  -5  -5    1.45    8.05  29 0.58852-0.07272 0.24454-0.98272-0.52226 0.02238
   6  -5  -6   17.62    7.08  29 0.58825 0.04404 0.24477-0.98918-0.52243-0.05236
   6  -5  -5   34.84    7.91  29 0.58825 0.08705 0.24478-0.96712-0.52243 0.07675
   6   0   1  -11.54    8.05  30 0.59283 0.39068 0.24058-0.14099-0.51939 0.95023
   8  -3  -2   30.13   12.82  29 0.59000 0.53902 0.24318-0.59551-0.52127 0.59755
   9  -4  -8   13.10    7.98  29 0.58903 0.43717 0.24407-0.84146-0.52192-0.13653
   9  -4  -7  -14.85    7.78  30 0.58839 0.47666 0.24465-0.83274-0.52234-0.01294
   9  -4  -6   39.10   10.28  29 0.58901 0.52098 0.24409-0.80270-0.52193 0.11759
  10  -3  -9   28.73    5.47  29 0.58740 0.57204 0.24556-0.71422-0.52299-0.18979
  10  -3  -6   15.61    7.91  29 0.58787 0.69412 0.24512-0.65404-0.52268 0.19046
  10  -2  -4   25.30    8.81  29 0.58950 0.78472 0.24364-0.47007-0.52161 0.46668
  10   3  -3   -4.73    5.70  29 0.58825 0.88788 0.24478 0.25330-0.52243 0.70622
  11  -2  -8   -4.97    6.30  30 0.59332 0.77116 0.24012-0.54135-0.51906-0.00153
  12   1  -8   -3.70    4.02  31 0.59702 0.96730 0.23671-0.09379-0.51657 0.11780
   2  -4  -5  121.18    3.13  32 0.61861-0.55898 0.21634-0.85705-0.50152-0.12521
   3  -3   0   85.36    6.41  30 0.59970-0.16928 0.23433-0.61663-0.51485 0.59772
   4  -2   1   41.43    8.41  31 0.60582 0.03541 0.22859-0.43754-0.51062 0.79467
   5  -5  -4   19.92    7.04  30 0.59908-0.04218 0.23491-0.95324-0.51527 0.14350
   5  -3   0  -16.01    8.79  31 0.59832 0.14620 0.23562-0.59306-0.51579 0.69995
   6  -5  -7  227.44    7.55  31 0.60380-0.01151 0.23049-0.99530-0.51203-0.19073
   6  -5  -4   22.03    9.98  32 0.60944 0.10607 0.22515-0.93643-0.50808 0.18846
   7  -5  -6   51.31    9.51  30 0.60163 0.18671 0.23253-0.96057-0.51352-0.00997
   7  -4 -10   62.79    5.15  31 0.60335 0.03378 0.23091-0.90005-0.51234-0.50205
   7  -3  -1    1.00   10.95  30 0.59772 0.41950 0.23618-0.58452-0.51620 0.67263
   8  -2  -1  115.76   12.29  31 0.60427 0.58227 0.23005-0.42528-0.51170 0.74184
  10  -1  -3   32.94    8.41  30 0.60009 0.82785 0.23397-0.29980-0.51458 0.60992
  11  -2  -9   -3.23    4.48  31 0.59894 0.72302 0.23504-0.55573-0.51537-0.13308
  11  -2  -7   78.13    6.22  30 0.59849 0.81176 0.23546-0.50848-0.51567 0.13115
  11  -1  -5   79.07    8.59  30 0.60207 0.89826 0.23211-0.32231-0.51322 0.40268
   1  -3  -2   59.50    2.93  32 0.61736-0.57843 0.21757-0.66858-0.50247 0.23054
   2  -4  -3    3.85    4.05  32 0.61580-0.47411 0.21909-0.81630-0.50361 0.13360
   3  -2   1  188.12    6.16  31 0.61145-0.12770 0.22327-0.44559-0.50672 0.73828
   4  -5  -5   26.65    6.06  31 0.61373-0.25310 0.22108-0.97003-0.50509-0.04141
   4  -5  -4   42.78    6.84  32 0.61907-0.21711 0.21592-0.94697-0.50124 0.08292
   4  -4  -1   -3.41    7.29  31 0.60830-0.07266 0.22626-0.75632-0.50894 0.49287
   5  -5  -7    1.02    6.45  32 0.61792-0.18400 0.21703-0.99266-0.50207-0.25212
   5  -4  -1   95.72    9.09  31 0.60937 0.08401 0.22525-0.73977-0.50819 0.54543
   6  -1   1   38.36    9.24  32 0.61626 0.35022 0.21864-0.25967-0.50327 0.90988
   7  -5  -7  -11.61    8.00  32 0.61532 0.13052 0.21955-0.97392-0.50395-0.15239
   7  -5  -5   20.09    8.58  31 0.60904 0.21995 0.22557-0.93723-0.50842 0.10920
   7  -4  -2   -7.71   10.53  32 0.61026 0.35203 0.22440-0.73517-0.50756 0.51446
   7  -2   0    9.21   11.35  33 0.62206 0.45507 0.21300-0.40363-0.49905 0.81207
   8  -4  -3   29.10   10.24  31 0.61094 0.46542 0.22375-0.73939-0.50707 0.43555
   9  -4  -9  -11.70    6.19  32 0.61725 0.36954 0.21768-0.84076-0.50255-0.28578
   9  -4  -5    3.20    8.90  31 0.60790 0.54574 0.22664-0.76923-0.50922 0.23241
   9  -3  -3   -4.04    9.74  31 0.60748 0.64045 0.22704-0.58848-0.50951 0.51065
   9  -2  -2   15.24    9.67  32 0.61058 0.69175 0.22410-0.42488-0.50733 0.65929
   9   1  -1   12.92    8.52  32 0.61915 0.76021 0.21584 0.02711-0.50118 0.84719
  10  -3 -10   21.98    4.82  32 0.61803 0.50070 0.21693-0.70500-0.50199-0.34045
  10  -3  -5    9.83    8.14  32 0.60983 0.71407 0.22481-0.61381-0.50786 0.30383
  11  -2  -6   -8.58    7.76  32 0.61510 0.83515 0.21976-0.47328-0.50411 0.24426
  11   1  -4   18.87    6.87  32 0.61401 0.95214 0.22081-0.01102-0.50489 0.56604
  12   0  -8    4.49    4.19  31 0.61148 0.93464 0.22323-0.22077-0.50669 0.08555
  12   1  -7   13.24    4.42  31 0.61282 0.98717 0.22195-0.05858-0.50574 0.23423
   4  -5  -6    2.42    5.44  34 0.63462-0.31577 0.20078-0.97182-0.48987-0.18706
   5  -5  -3   11.14    7.61  33 0.62182-0.02368 0.21347-0.91185-0.49947 0.25593
   5  -2   1   75.95    7.65  32 0.62130 0.17564 0.21397-0.40943-0.49985 0.83384
   6  -5  -3   36.74   10.71  33 0.62881 0.12615 0.20658-0.89224-0.49427 0.30102
   7  -5  -4    5.36    9.50  32 0.62209 0.24648 0.21320-0.90112-0.49927 0.22761
   8  -4 -10   22.64    4.90  32 0.62322 0.16943 0.21209-0.86715-0.49843-0.46696
   8   0   0   48.47    9.75  33 0.62590 0.62492 0.20946-0.10161-0.49645 0.89772
   8   1   0  -10.47    6.95  33 0.62250 0.64167 0.21279 0.03678-0.49896 0.92264
   9   0  -1   33.04    8.18  32 0.62209 0.74330 0.21320-0.11186-0.49927 0.82062
   9   2  -1   42.66    7.87  33 0.63235 0.75860 0.20306 0.18132-0.49160 0.85969
  11  -2 -10   18.26    3.99  32 0.62060 0.66494 0.21465-0.54884-0.50036-0.27191
  11   0  -4   15.99    7.45  32 0.62313 0.93161 0.21218-0.14307-0.49850 0.53750
  11   2  -4    5.93    5.49  33 0.62361 0.95667 0.21171 0.13928-0.49814 0.58180
  12   0  -7   -2.54    4.71  33 0.62955 0.96037 0.20585-0.18349-0.49372 0.20010
   3  -4  -1   71.05    6.27  33 0.63354-0.25463 0.20184-0.74463-0.49073 0.42478
   3   1   2  215.33    3.84  34 0.63722-0.07359 0.19813 0.02325-0.48791 0.91575
   4  -5  -3   37.74    7.77  34 0.63862-0.19611 0.19672-0.90878-0.48682 0.19694
   4   1   2  215.12    5.08  34 0.63865 0.08081 0.19669 0.03764-0.48680 0.96479
   5   4   1   36.43    2.06  36 0.66015 0.21082 0.17438 0.47999-0.46951 0.93518
   6  -5  -8   -6.07    6.37  34 0.64407-0.09405 0.19116-0.97809-0.48255-0.35129
   7  -5  -8   77.99    6.95  34 0.63965 0.06839 0.19567-0.96752-0.48602-0.29367
   8  -5  -7   -1.10    8.40  33 0.63313 0.26742 0.20225-0.93367-0.49104-0.11200
   8  -5  -6    5.11    8.06  33 0.63313 0.31085 0.20225-0.91916-0.49104 0.01441
   8  -5  -5   13.37   10.54  35 0.64244 0.34436 0.19283-0.89282-0.48384 0.13518
   8   2   0   32.84    6.60  34 0.63739 0.63806 0.19797 0.19243-0.48778 0.93312
   9  -4  -4    2.54    9.56  33 0.63237 0.56267 0.20301-0.72602-0.49162 0.34288
   9  -1  -1  204.93   10.92  34 0.64039 0.71341 0.19492-0.23280-0.48545 0.78646
  10  -3  -4   -1.07    9.78  34 0.63818 0.72523 0.19716-0.56531-0.48716 0.41046
  10  -2  -3   35.40    8.67  33 0.63314 0.78086 0.20223-0.40962-0.49103 0.56449
  10   1  -2   32.73    7.98  34 0.63646 0.85540 0.19890 0.03690-0.48849 0.75397
   1  -2   0 2621.00    5.66  35 0.64854-0.51651 0.18663-0.45931-0.47900 0.48302
   2  -4  -2  192.58    5.25  35 0.65308-0.47052 0.18190-0.76092-0.47533 0.23061
   3   0   2  524.73    5.71  35 0.64724-0.09611 0.18798-0.10849-0.48004 0.88556
   4   0   2   74.30    4.91  34 0.64397 0.06272 0.19134-0.09727-0.48264 0.93838
   6  -2   1   76.64   10.67  35 0.65094 0.30407 0.18414-0.36493-0.47707 0.86120
   7  -5  -3   -1.10   11.91  34 0.64611 0.26245 0.18914-0.85632-0.48094 0.33677
   7   0   1  107.99    9.18  35 0.65186 0.48274 0.18317-0.06919-0.47632 0.95544
   7   1   1   63.75    7.35  35 0.65171 0.49490 0.18333 0.07061-0.47644 0.97718
   8  -3  -1   15.77   12.37  36 0.65352 0.52761 0.18144-0.52151-0.47497 0.68721
   8  -1   0   37.21    9.08  34 0.64317 0.59334 0.19215-0.22684-0.48326 0.86252
  10  -4  -7   16.30    7.92  35 0.64690 0.58038 0.18832-0.75638-0.48031-0.00177
  10   0  -2  285.22    8.37  34 0.64197 0.84000 0.19338-0.09596-0.48421 0.73101
  10   2  -2  -28.38    6.90  36 0.65418 0.85538 0.18075 0.19358-0.47444 0.76236
  11  -2  -5    9.20    6.60  34 0.64243 0.85062 0.19291-0.42734-0.48385 0.35214
  11  -1  -4    0.65    6.89  35 0.64500 0.89947 0.19027-0.26280-0.48182 0.49950
  12  -1  -8   -2.63    4.01  35 0.64858 0.88611 0.18659-0.33275-0.47897 0.02936
  12   1  -6   -8.06    4.61  35 0.64877 0.99510 0.18639-0.00950-0.47882 0.32948
   2  -3   0  134.44    5.53  35 0.65326-0.37647 0.18186-0.57884-0.47535 0.50943
   2  -2   1 1740.51    7.70  36 0.65967-0.33018 0.17509-0.41241-0.47007 0.65323
   5  -5  -2  -20.43    8.06  36 0.65378-0.01807 0.18131-0.85982-0.47493 0.35911
   6  -5  -2  133.17   11.69  36 0.65932 0.13614 0.17546-0.83777-0.47036 0.40660
   7  -4  -1   35.86   10.84  35 0.65564 0.34764 0.17935-0.66742-0.47340 0.60611
   7  -3   0  -10.78   12.18  36 0.65997 0.39780 0.17478-0.50341-0.46983 0.75377
   8  -5  -8   32.77    7.08  35 0.65498 0.20700 0.18005-0.93366-0.47394-0.25599
   8  -5  -4  128.13   11.58  35 0.65625 0.36924 0.17871-0.85558-0.47290 0.25141
   8  -4  -2   -3.30   10.74  35 0.65172 0.46860 0.18346-0.67981-0.47660 0.53287
   9  -3  -2   20.54   10.07  35 0.65303 0.63641 0.18209-0.52412-0.47553 0.60436
  10  -4  -8   -3.38    5.40  36 0.65464 0.52543 0.18041-0.77468-0.47422-0.14009
  10  -4  -6  -12.49    7.45  36 0.65364 0.61030 0.18145-0.73602-0.47504 0.11680
  10  -1  -2  -15.84    9.67  36 0.65900 0.81210 0.17580-0.22523-0.47063 0.69323
  11  -3  -8   -6.06    4.96  36 0.65417 0.69619 0.18090-0.62182-0.47461-0.06836
  11  -3  -7    0.41    5.53  36 0.65423 0.73791 0.18083-0.60171-0.47455 0.05974
  12  -1  -7   -1.06    4.89  36 0.66057 0.92182 0.17413-0.29338-0.46932 0.15283
  12   0  -6    8.23    5.05  35 0.65465 0.97464 0.18040-0.13713-0.47421 0.30768
   2  -4  -6    3.40    1.85  40 0.69584-0.67704 0.13502-0.79161-0.43798-0.31595
   4  -5  -2   15.21    6.90  36 0.66477-0.18354 0.16977-0.85890-0.46584 0.30189
   4  -4   0   72.98    9.77  37 0.66930-0.09165 0.16486-0.67520-0.46197 0.57612
   4  -3   1  322.29    8.09  36 0.66532-0.03542 0.16917-0.51732-0.46538 0.72545
   4  -1   2   -9.39    7.23  36 0.66477 0.02846 0.16977-0.21637-0.46584 0.89615
   5  -5  -8  115.86    5.02  38 0.67972-0.28453 0.15338-0.95125-0.45283-0.42852
   5   0   2   44.55    6.84  36 0.66657 0.19609 0.16782-0.06265-0.46431 0.96982
   5   1   2  114.85    5.62  37 0.66730 0.20852 0.16703 0.08116-0.46369 0.99095
   7  -1   1   -1.17    8.09  37 0.66547 0.45546 0.16901-0.19777-0.46525 0.92037
   7   2   1  152.73    6.57  37 0.67503 0.48574 0.15858 0.24009-0.45699 0.97999
   8  -2   0   54.39   11.82  37 0.66841 0.55611 0.16582-0.33852-0.46273 0.81797
   9  -4  -3   18.50    9.65  36 0.66316 0.57255 0.17149-0.67452-0.46720 0.44617
   9  -2  -1   92.52   11.32  37 0.66723 0.67417 0.16711-0.34632-0.46375 0.74265
  10  -4  -5    1.77    9.40  36 0.66477 0.64318 0.16977-0.69463-0.46584 0.23975
  11  -3  -9   10.14    4.55  37 0.66757 0.64839 0.16674-0.62094-0.46345-0.20225
  11  -3  -6   10.67    6.06  37 0.66504 0.77353 0.16947-0.56437-0.46561 0.18336
   3  -5  -4   35.76    4.83  38 0.67765-0.43061 0.15567-0.90115-0.45473-0.01467
   3  -5  -3  195.98    7.04  38 0.68490-0.39784 0.14755-0.87358-0.44822 0.10542
   3  -1   2   25.54    6.56  37 0.67614-0.13910 0.15735-0.21856-0.45607 0.83765
   4  -5  -7   51.58    4.13  39 0.68848-0.41022 0.14348-0.93620-0.44494-0.36024
   5  -3   1   28.64    8.98  38 0.67494 0.10948 0.15866-0.50002-0.45712 0.76911
   5  -1   2  170.65    8.07  38 0.68236 0.16763 0.15041-0.18376-0.45052 0.93426
   7  -5  -2  129.03   12.60  38 0.67798 0.27116 0.15531-0.80259-0.45444 0.43871
   8  -5  -3   45.29   11.81  37 0.67757 0.38581 0.15576-0.80917-0.45481 0.36045
   9  -5  -7   12.25    7.51  38 0.67867 0.38275 0.15453-0.88040-0.45382-0.10144
   9  -5  -6   -0.30    7.43  38 0.67495 0.42689 0.15866-0.86390-0.45712 0.03030
   9  -5  -5   -5.96    9.78  38 0.68033 0.45631 0.15269-0.83790-0.45235 0.15181
  10  -4  -9    6.61    4.76  38 0.67914 0.46951 0.15401-0.76507-0.45341-0.28651
  10  -3  -3   -5.69    8.36  38 0.67440 0.72860 0.15926-0.50964-0.45760 0.50861
  11  -2  -4    9.01    6.49  37 0.67463 0.85767 0.15901-0.37259-0.45740 0.45272
  11   0  -3   12.78    7.02  37 0.67655 0.91750 0.15689-0.06790-0.45571 0.62112
  11   1  -3    2.22    5.86  38 0.67962 0.92997 0.15347 0.07666-0.45298 0.64216
  12  -1  -6   11.19    4.87  37 0.67607 0.94113 0.15742-0.25517-0.45613 0.26757
   0   2   0    2.73    1.34  39 0.68932-0.66488 0.14237 0.13980-0.44414 0.48874
   1  -3  -1   22.11    3.87  39 0.69042-0.61036 0.14111-0.56833-0.44312 0.30076
   3  -5  -5   -2.69    4.23  39 0.69208-0.48820 0.13920-0.90343-0.44157-0.15587
   3  -3   1    7.82    6.81  39 0.68506-0.21154 0.14722-0.51045-0.44806 0.66021
   5  -5  -1   22.18   10.82  39 0.68956-0.00861 0.14210-0.79755-0.44392 0.45763
   7  -5  -9   20.38    5.01  39 0.69025-0.02406 0.14131-0.93118-0.44328-0.46585
   7  -2   1   38.29   10.84  38 0.68768 0.41924 0.14424-0.31106-0.44565 0.87616
   9  -5  -8    1.10    6.10  39 0.69072 0.31782 0.14077-0.88621-0.44284-0.24258
  10  -4  -4   -3.11    9.49  40 0.69465 0.66331 0.13624-0.65046-0.43916 0.34204
  10  -2  -2   20.38    8.34  38 0.68291 0.77482 0.14965-0.33713-0.45001 0.65106
  10   3  -2   10.65    5.16  38 0.68495 0.82683 0.14734 0.36288-0.44815 0.75311
  11  -3  -5   24.26    6.14  38 0.68384 0.79460 0.14860-0.52339-0.44917 0.29530
  11  -1  -3   -1.93    7.53  39 0.69112 0.89341 0.14031-0.19297-0.44247 0.58735
  12  -2  -8    4.50    3.79  39 0.68888 0.83467 0.14287-0.42190-0.44455-0.02202
  12   0  -5   13.75    4.85  39 0.69246 0.97974 0.13877-0.07731-0.44122 0.40270
   1  -1   1 2352.71    4.58  39 0.69319-0.50901 0.13802-0.24886-0.44071 0.59524
   2  -4  -1    4.86    6.05  41 0.70255-0.48018 0.12706-0.68833-0.43176 0.31632
   2   0   2  145.53    4.17  40 0.69760-0.30489 0.13289-0.06753-0.43653 0.79028
   2   1   2  107.41    2.91  40 0.69965-0.29336 0.13048 0.07687-0.43457 0.81158
   3  -4   0   22.80    6.63  39 0.69299-0.27300 0.13825-0.66226-0.44090 0.50330
   4  -5  -1   25.29    8.97  40 0.70103-0.17914 0.12885-0.79834-0.43323 0.39702
   5   2   2    6.97    4.10  40 0.69975 0.18826 0.13036 0.25947-0.43447 0.98463
   6  -6  -5    7.32    8.43  39 0.69720-0.03800 0.13336-0.99235-0.43692-0.03337
   6  -5  -1   73.14    9.91  39 0.69501 0.14050 0.13590-0.77609-0.43899 0.50162
   6  -3   1   14.00    9.49  39 0.69294 0.25037 0.13830-0.46161-0.44094 0.80400
   6   0   2   65.15    7.50  40 0.70324 0.31585 0.12623-0.00477-0.43108 0.98696
   8  -5  -9    7.94    4.84  39 0.69705 0.12384 0.13353-0.90841-0.43706-0.42239
   8  -4  -1   48.20   10.66  39 0.69459 0.46282 0.13639-0.61173-0.43939 0.62519
   9  -5  -4   11.23   10.31  40 0.69717 0.48548 0.13339-0.79746-0.43694 0.26557
   9  -4  -2   33.09   11.56  40 0.70001 0.57699 0.13005-0.61387-0.43422 0.54213
   9  -3  -1   20.39   11.53  40 0.70090 0.62744 0.12901-0.44979-0.43336 0.69106
  11   2  -3    6.65    4.89  40 0.69945 0.92229 0.13072 0.24064-0.43476 0.64538
  12  -2  -7   -6.05    3.63  40 0.69408 0.86704 0.13698-0.40469-0.43987 0.09469
   3  -5  -2   65.02    6.78  41 0.70630-0.38022 0.12274-0.82924-0.42822 0.21213
   4  -2   2  115.21    6.86  40 0.70293-0.02169 0.12675-0.31451-0.43152 0.84365
   5  -2   2   54.80    9.16  41 0.70840 0.13016 0.12021-0.29458-0.42613 0.88701
   6  -6  -6   40.86    8.14  42 0.71678-0.09624 0.10999-0.99965-0.41765-0.18198
   6  -6  -4   17.15    8.05  40 0.70388-0.00282 0.12563-0.97037-0.43060 0.08705
   6  -1   2   21.49    8.70  41 0.70840 0.29661 0.12021-0.13983-0.42613 0.95620
   6   1   2   -8.40    6.81  42 0.71318 0.32103 0.11442 0.14622-0.42133 0.99995
   7  -6  -6   -7.57    7.62  42 0.71348 0.06301 0.11404-0.98858-0.42102-0.12884
   7  -6  -5   10.46    9.07  41 0.70840 0.10950 0.12022-0.97546-0.42614 0.00413
   7  -4   0   10.46   10.51  40 0.70549 0.33850 0.12371-0.59203-0.42902 0.68920
   8  -5  -2    8.64   12.19  41 0.70784 0.39740 0.12089-0.75508-0.42669 0.45922
   8  -3   0    7.57   10.17  40 0.70349 0.51084 0.12609-0.44150-0.43098 0.76510
   9  -1   0   23.81    9.63  41 0.70879 0.68393 0.11975-0.13882-0.42575 0.85194
   9   0   0   59.95    7.43  40 0.70379 0.70325 0.12573-0.00444-0.43068 0.88089
   9   1   0   14.53    7.36  41 0.70914 0.70785 0.11933 0.14323-0.42540 0.89545
  10   0  -1    5.74    7.80  41 0.71066 0.81068 0.11748-0.00217-0.42387 0.79516
  11  -3  -4   15.02    7.64  41 0.70854 0.80821 0.12005-0.47306-0.42600 0.39743
  12  -2  -6    0.07    4.70  41 0.70708 0.89774 0.12180-0.36094-0.42745 0.21597
  12  -1  -5   -5.39    4.84  42 0.71181 0.95507 0.11608-0.19550-0.42271 0.36270
   3  -2   2   60.79    7.48  42 0.71631-0.19254 0.11073-0.31361-0.41845 0.77771
   5  -6  -5   -4.83    6.91  42 0.71818-0.21426 0.10842-0.98714-0.41652-0.10537
   5  -6  -4   34.16    8.20  42 0.71648-0.17189 0.11052-0.97225-0.41827 0.02448
   6  -6  -3   -6.07   10.56  41 0.71344 0.02743 0.11425-0.93477-0.42138 0.20456
   7  -6  -4    1.21    8.61  41 0.71153 0.14584 0.11657-0.94806-0.42331 0.12908
   7  -5  -1   35.33   10.67  41 0.71426 0.27651 0.11324-0.74163-0.42054 0.53057
   8  -1   1    9.44    9.90  42 0.71941 0.55857 0.10688-0.11889-0.41524 0.91917
   8   0   1   20.03    8.57  42 0.71876 0.57619 0.10769 0.01920-0.41591 0.94672
   9  -5  -3   -0.79   10.68  42 0.71935 0.50367 0.10696-0.75020-0.41530 0.37078
  10  -4  -3    3.65    9.45  42 0.71823 0.67422 0.10835-0.59736-0.41646 0.44420
  10  -3  -2   81.76    8.52  41 0.71349 0.73096 0.11419-0.43870-0.42133 0.60004
  10  -1  -1   90.74    9.27  42 0.71745 0.79172 0.10931-0.13415-0.41727 0.76714
  10   1  -1   17.05    6.42  42 0.71706 0.81508 0.10979 0.14688-0.41767 0.80929
  11  -4  -7    7.97    4.64  42 0.71445 0.66996 0.11302-0.66773-0.42035-0.01351
  11  -4  -6   -2.25    5.99  42 0.71821 0.70341 0.10837-0.64647-0.41648 0.10778
  11  -2  -3    4.05    6.64  42 0.71402 0.85963 0.11353-0.30660-0.42078 0.54276
   2  -1   2   27.70    4.62  42 0.72317-0.34347 0.10232-0.17787-0.41133 0.74165
   4  -4   1  270.48   10.63  43 0.72584-0.10709 0.09895-0.58719-0.40850 0.64863
   5  -6  -3   -4.84    7.34  42 0.72232-0.13699 0.10340-0.94216-0.41224 0.14554
   7  -6  -7  103.94    7.16  43 0.73085 0.00541 0.09255-0.98356-0.40310-0.27247
   7  -6  -3   30.08   10.92  42 0.72263 0.17072 0.10300-0.90832-0.41191 0.24849
   7  -3   1   15.40    9.59  42 0.72155 0.37503 0.10436-0.41526-0.41304 0.82241
   8  -6  -6   50.78    8.40  42 0.72338 0.20910 0.10206-0.95547-0.41112-0.08835
   8  -6  -5   33.71    7.59  42 0.72294 0.24950 0.10261-0.93861-0.41157 0.04046
   8   1   1   85.28    6.87  43 0.72545 0.57846 0.09945 0.17192-0.40892 0.95763
   9  -5  -9   15.73    4.73  43 0.72576 0.25126 0.09906-0.85984-0.40859-0.40226
   9  -2   0  338.28   10.92  43 0.72614 0.65774 0.09858-0.25416-0.40818 0.81272
  10  -5  -7   16.66    6.03  44 0.72850 0.49178 0.09557-0.81010-0.40564-0.10241
  10  -5  -6    1.76    6.05  42 0.72094 0.53537 0.10512-0.79425-0.41369 0.03537
  10  -5  -5   12.51    7.92  43 0.72769 0.56945 0.09660-0.76475-0.40651 0.15635
  11  -4  -8   -3.61    3.94  43 0.72241 0.61842 0.10327-0.68114-0.41213-0.15204
   2  -3   1   41.34    5.88  43 0.73175-0.41738 0.09140-0.46730-0.40208 0.56066
   3  -5  -6   -2.71    3.10  43 0.73435-0.56985 0.08803-0.86743-0.39922-0.32625
   3  -5  -1  183.60    7.78  44 0.73396-0.36727 0.08854-0.77242-0.39965 0.31098
   5  -6  -6   -0.16    6.19  45 0.74055-0.27769 0.07988-0.98008-0.39226-0.25832
   5  -5   0   35.21    9.79  43 0.73114-0.01094 0.09219-0.72775-0.40275 0.54336
   6  -6  -7   15.67    5.99  45 0.74225-0.16350 0.07761-0.98254-0.39031-0.33737
   6  -6  -2   14.28   11.35  44 0.73769 0.04566 0.08366-0.89123-0.39549 0.30706
   6  -5   0  -19.63   13.27  44 0.73607 0.13788 0.08578-0.70835-0.39731 0.58512
   6  -2   2   23.53    8.14  44 0.73127 0.26409 0.09203-0.25375-0.40261 0.91509
   8  -6  -4   24.94    8.78  44 0.73167 0.28180 0.09151-0.90945-0.40217 0.15878
   8  -2   1  120.71   11.02  44 0.73422 0.53291 0.08821-0.23895-0.39937 0.88013
   9   2   0   30.55    6.01  44 0.74095 0.69139 0.07934 0.32659-0.39180 0.88560
  10  -5  -8   -6.90    4.89  44 0.73685 0.43428 0.08476-0.81386-0.39643-0.23865
  10  -2  -1  633.97   10.42  44 0.73344 0.76593 0.08922-0.24978-0.40023 0.72765
  11  -4  -5   32.08    5.56  43 0.73141 0.73485 0.09185-0.60637-0.40246 0.22465
  11   0  -2    2.56    5.86  44 0.73609 0.89845 0.08575 0.02426-0.39728 0.68868
  12  -2  -5    3.87    4.30  43 0.73027 0.91557 0.09331-0.31196-0.40369 0.31906
  12   0  -4    7.00    4.58  44 0.73448 0.97597 0.08787-0.00446-0.39908 0.48606
   0   1   0   60.55    0.89  45 0.74657-0.73554 0.07211 0.06545-0.38549 0.40641
   2  -4   0    6.70    6.87  44 0.74247-0.47891 0.07765-0.60986-0.39025 0.39980
   4  -6  -4   -8.23    6.23  45 0.74747-0.35929 0.07089-0.94272-0.38443-0.06023
   4  -6  -3    7.56    7.29  45 0.74735-0.31839 0.07106-0.92210-0.38458 0.06776
   4  -5   0   16.18    8.06  44 0.73976-0.17622 0.08125-0.73156-0.39333 0.48165
   4  -3   2  496.42    8.36  44 0.74033-0.06874 0.08049-0.40887-0.39268 0.78172
   5  -6  -2   14.24    8.00  45 0.73993-0.11365 0.08103-0.90070-0.39315 0.25413
   5  -3   2   19.21    8.65  44 0.74027 0.08364 0.08058-0.39408-0.39276 0.82997
   6   2   2   21.33    4.25  45 0.74751 0.29552 0.07084 0.33045-0.38439 0.98369
   7  -6  -2    2.01   11.52  44 0.74027 0.19384 0.08058-0.86182-0.39276 0.35022
   7   0   2  -14.69    7.88  45 0.74781 0.42751 0.07042 0.06539-0.38403 0.98832
   8  -6  -7   45.09    6.17  44 0.74041 0.15156 0.08039-0.95759-0.39260-0.23315
   8  -6  -3   47.12   10.95  45 0.74469 0.30851 0.07467-0.86983-0.38769 0.26989
   8  -5  -1    9.09   11.86  45 0.74569 0.40609 0.07331-0.69272-0.38652 0.54940
   8  -4   0    9.97   10.08  45 0.74009 0.46155 0.08082-0.53581-0.39296 0.70360
   9  -4  -1  -16.78    9.48  45 0.73911 0.57713 0.08211-0.54648-0.39407 0.62716
  10  -5  -4   -3.85    8.44  45 0.74403 0.59220 0.07555-0.72895-0.38845 0.26293
  10   2  -1    2.58    5.28  45 0.74820 0.79831 0.06989 0.32854-0.38357 0.79853
  11  -3  -3   74.21    7.51  44 0.74094 0.81745 0.07969-0.41064-0.39200 0.49114
  11  -1  -2    5.54    6.48  45 0.74258 0.88344 0.07750-0.10836-0.39012 0.66123
  12  -3  -7   -4.94    2.93  45 0.73909 0.81271 0.08214-0.48493-0.39409 0.02969
  12  -3  -7   -2.30    1.89  44 0.74027 0.81614 0.08058-0.47968-0.39276 0.03158
  12  -3  -6    2.63    4.17  45 0.74547 0.84727 0.07360-0.45241-0.38677 0.15187
  12  -1  -4   -2.00    4.76  45 0.74411 0.95730 0.07544-0.13709-0.38835 0.45089
   3  -4   1    9.87    7.24  45 0.74777-0.28736 0.07044-0.57348-0.38391 0.57283
   7  -5   0   38.35   13.18  46 0.75208 0.27658 0.06451-0.67218-0.37878 0.61689
   7  -1   2  243.37    7.87  45 0.74839 0.41608 0.06958-0.07286-0.38317 0.96608
   8   2   1  -18.98    5.34  47 0.75742 0.56286 0.05705 0.34952-0.37229 0.94121
   9  -6  -6   14.71    7.27  47 0.75506 0.33585 0.06036-0.90682-0.37517-0.07460
   9  -6  -5   25.76    8.46  46 0.75108 0.37710 0.06589-0.88776-0.37998 0.05727
   9  -5  -2   54.55    9.02  45 0.74699 0.51753 0.07150-0.69411-0.38482 0.46896
   9  -3   0   -1.09    9.07  46 0.75032 0.61977 0.06694-0.36709-0.38089 0.76378
  10  -4  -2   -2.58    7.89  45 0.74860 0.68172 0.06930-0.53568-0.38293 0.53664
  11  -4  -4   -1.60    6.56  47 0.75682 0.76028 0.05789-0.55716-0.37302 0.32475
  11   1  -2    1.29    4.94  45 0.74861 0.90039 0.06929 0.18150-0.38292 0.69759
   1  -3   0  532.17    5.40  47 0.75989-0.63993 0.05343-0.46617-0.36916 0.35133
   1  -2   1 2265.84    6.56  47 0.76061-0.58810 0.05241-0.30423-0.36826 0.50022
   2  -2   2  424.99    7.12  47 0.75899-0.38958 0.05472-0.27108-0.37028 0.68000
   3  -3   2   94.19    7.02  46 0.75694-0.24438 0.05762-0.39823-0.37282 0.71109
   4  -6  -5   54.29    5.53  47 0.76352-0.41511 0.04823-0.94145-0.36459-0.20785
   4  -6  -2   54.96    8.53  46 0.75816-0.28771 0.05589-0.88530-0.37131 0.18518
   4   3   2   39.78    1.63  49 0.77532-0.03120 0.03077 0.48848-0.34911 0.87010
   5  -6  -1   -6.16   10.30  47 0.76286-0.09559 0.04919-0.84934-0.36543 0.35518
   6  -6  -1   20.79   11.92  46 0.75813 0.06373 0.05594-0.83639-0.37135 0.40898
   6  -3   2    8.48    9.07  46 0.75533 0.22729 0.05989-0.36102-0.37479 0.86380
   7  -4   1   14.31   10.32  46 0.75545 0.32999 0.05972-0.50795-0.37465 0.76315
   7  -2   2   41.47   10.65  47 0.75874 0.39065 0.05508-0.20091-0.37060 0.92945
   7   1   2   73.69    7.02  47 0.76518 0.42407 0.04582 0.23176-0.36247 0.99086
   8  -3   1   11.91    9.54  47 0.75769 0.49690 0.05656-0.35023-0.37189 0.83275
   9  -6  -7    0.85    5.60  48 0.76514 0.28303 0.04588-0.91045-0.36252-0.21567
   9  -6  -4   -8.65    8.96  47 0.76050 0.40265 0.05256-0.86125-0.36839 0.16929
  10  -3  -1  265.94    8.50  46 0.75667 0.72942 0.05800-0.36091-0.37314 0.67990
  11  -2  -2   32.17    5.86  46 0.75607 0.85708 0.05885-0.22829-0.37389 0.62443
  12  -2  -4   14.55    4.84  48 0.76441 0.92987 0.04693-0.24670-0.36345 0.40834
   3  -5   0    1.10    8.39  47 0.76483-0.35743 0.04631-0.70677-0.36293 0.40104
   4  -1   3   31.95    6.88  48 0.77112-0.03576 0.03705-0.06525-0.35474 0.91688
   4   0   3  141.53    5.72  48 0.77059-0.02336 0.03783 0.07630-0.35544 0.93833
   7  -6  -8   29.00    4.99  48 0.77173-0.07715 0.03614-0.94636-0.35393-0.44986
   8  -6  -8   19.49    5.24  48 0.77154 0.07899 0.03642-0.93311-0.35418-0.39858
   8  -6  -2   27.05    9.22  48 0.76538 0.32932 0.04550-0.82175-0.36222 0.37334
  10  -5  -3  -20.23    7.20  48 0.76385 0.61097 0.04773-0.68311-0.36418 0.36529
  12  -3  -5    1.92    3.89  48 0.76481 0.87345 0.04633-0.40678-0.36295 0.25749
   2  -5  -3  448.00    4.38  49 0.77746-0.64718 0.02744-0.76790-0.34618-0.04836
   2  -5  -2  124.55    5.03  49 0.77913-0.60881 0.02487-0.74383-0.34388 0.07809
   2   2   2  335.68    1.60  51 0.78967-0.37142 0.00820 0.34116-0.32882 0.72713
   4  -6  -1   14.56    9.18  49 0.77515-0.26480 0.03095-0.83869-0.34932 0.28826
   5  -6  -7   13.35    4.40  50 0.78287-0.35969 0.01904-0.93530-0.33864-0.43592
   5  -1   3   90.84    7.89  49 0.77463 0.11594 0.03174-0.04603-0.35003 0.96076
   5   0   3   67.27    6.38  49 0.77695 0.12724 0.02820 0.09885-0.34687 0.97951
   5   3   2    8.09    2.20  51 0.78839 0.11108 0.01028 0.52051-0.33071 0.90079
   6  -5   1   16.30   13.16  48 0.77370 0.14079 0.03314-0.63261-0.35128 0.66478
   7  -6  -1   23.64   10.06  48 0.77113 0.20884 0.03699-0.80898-0.35470 0.44470
   9  -6  -3  -11.23    7.89  49 0.77329 0.43073 0.03375-0.81965-0.35182 0.28209
   9  -5  -1   21.37   10.26  50 0.77872 0.52877 0.02550-0.63068-0.34445 0.55895
   9  -1   1  137.93    8.45  49 0.77669 0.65870 0.02860-0.02524-0.34722 0.90173
  10  -1   0    0.73    7.44  50 0.78013 0.77394 0.02332-0.02824-0.34249 0.82241
  11  -5  -7    3.58    4.28  49 0.77816 0.59385 0.02635-0.72128-0.34521-0.10978
  11  -5  -6   22.67    4.97  49 0.77495 0.63888 0.03125-0.70564-0.34959 0.02304
  11  -4  -3  -16.93    6.63  49 0.77608 0.76996 0.02954-0.51010-0.34807 0.42208
  11  -3  -2   22.07    7.11  49 0.77747 0.82373 0.02741-0.33960-0.34616 0.57452
   3  -1   3    0.94    6.45  50 0.78442-0.20748 0.01652-0.05803-0.33645 0.84620
   3   0   3   51.58    4.89  50 0.78634-0.19573 0.01349 0.08580-0.33371 0.86636
   4  -5   1   19.83    9.13  49 0.77931-0.17480 0.02450-0.65588-0.34364 0.56120
   4  -4   2   16.32    9.03  49 0.77898-0.12150 0.02502-0.49474-0.34410 0.71104
   4  -2   3   -0.95    8.37  49 0.78062-0.05853 0.02248-0.18961-0.34182 0.87836
   5  -2   3  219.28    9.40  50 0.78324 0.09573 0.01838-0.17219-0.33813 0.92608
   6  -4   2   29.43   11.91  50 0.78377 0.18538 0.01756-0.46106-0.33739 0.80291
   7  -3   2   19.90    9.60  49 0.77849 0.36022 0.02577-0.31354-0.34478 0.88359
   8  -5   0    3.64    9.61  50 0.78011 0.41208 0.02326-0.62295-0.34253 0.63462
   8  -4   1   28.97   11.62  50 0.78329 0.45768 0.01831-0.45285-0.33807 0.77596
   9  -4   0   26.57    8.88  49 0.77843 0.57895 0.02586-0.46827-0.34486 0.70673
   9  -2   1   36.68    9.38  50 0.78369 0.63840 0.01769-0.15733-0.33750 0.87045
   9   0   1   32.93    7.20  49 0.78015 0.66614 0.02321 0.11749-0.34248 0.91837
  10  -4  -1   27.56    9.28  50 0.78438 0.68876 0.01659-0.46448-0.33651 0.61987
  10  -2   0    3.16    8.29  50 0.78496 0.75304 0.01568-0.16142-0.33569 0.79052
  10   0   0    9.16    6.31  50 0.78147 0.78143 0.02116 0.11520-0.34064 0.83977
  11  -5  -5   -8.51    4.73  50 0.78059 0.66825 0.02253-0.68248-0.34187 0.13814
  12  -3  -4   44.16    4.78  50 0.78458 0.89070 0.01628-0.35340-0.33624 0.35929
  12  -1  -3   -1.56    4.44  50 0.78403 0.95611 0.01714-0.06054-0.33701 0.52600
   0   2  -1  594.69    2.54  51 0.79287-0.81048 0.00293 0.25576-0.32411 0.23919
   1  -4  -2   29.16    3.41  52 0.79591-0.77005-0.00211-0.59056-0.31948 0.02630
   2  -5  -4   77.98    3.33  52 0.79909-0.71031-0.00747-0.75357-0.31455-0.20727
   2  -5  -1   18.02    5.95  51 0.79383-0.58301 0.00134-0.69929-0.32265 0.18659
   2  -4   1   70.31    7.56  51 0.79128-0.48782 0.00554-0.52161-0.32648 0.46639
   4   1   3   61.16    4.67  51 0.79307-0.03416 0.00261 0.25108-0.32381 0.92916
   5  -6   0    3.31    9.38  51 0.78768-0.08003 0.01135-0.78968-0.33177 0.44934
   6  -7  -4    8.57    8.20  51 0.79027-0.10182 0.00718-0.99135-0.32798-0.03697
   6  -7  -3   10.86    9.45  52 0.79366-0.06390 0.00163-0.96921-0.32291 0.08557
   6  -6   0   52.70   10.42  50 0.78753 0.07572 0.01160-0.77559-0.33200 0.50026
   6  -1   3  311.82    8.86  51 0.79239 0.25666 0.00371-0.00096-0.32482 0.98611
   7  -7  -5   -4.74    7.62  51 0.79249 0.01160 0.00356-0.99509-0.32467-0.11810
   7  -7  -4  -10.84    8.44  51 0.79031 0.04751 0.00710-0.98256-0.32791 0.00917
   7  -5   1   24.37   12.75  50 0.78883 0.28195 0.00951-0.59675-0.33010 0.69431
   8  -6  -1   -4.81   11.51  51 0.79044 0.34189 0.00689-0.76956-0.32772 0.46520
   8  -1   2  467.22    9.39  51 0.79110 0.52946 0.00582 0.00685-0.32674 0.95962
  10  -6  -6  -15.37    5.35  51 0.79009 0.44815 0.00747-0.84435-0.32825-0.07696
  10  -6  -5    3.75    5.53  50 0.78714 0.49703 0.01222-0.82096-0.33256 0.06152
  10  -5  -2   14.58    7.06  51 0.78783 0.63211 0.01112-0.62105-0.33156 0.46554
   1  -4  -3  182.07    2.54  53 0.80635-0.82103-0.02010-0.59441-0.30283-0.11894
   2  -3   2 1700.64    7.88  51 0.79485-0.43618-0.00039-0.35730-0.32104 0.60905
   3  -6  -3  -11.50    5.49  52 0.79806-0.53068-0.00577-0.85605-0.31609-0.04865
   3  -6  -2   18.51    6.54  51 0.79592-0.48203-0.00217-0.83620-0.31941 0.08493
   3  -4   2  695.80   10.24  52 0.79651-0.29403-0.00316-0.48036-0.31850 0.63600
   3  -2   3  161.89    7.82  52 0.79608-0.23041-0.00243-0.17977-0.31917 0.80702
   4  -6  -6   96.56    3.97  53 0.80300-0.49541-0.01423-0.89876-0.30829-0.39015
   5   1   3  164.85    4.78  52 0.79852 0.11814-0.00654 0.27584-0.31539 0.97002
   6  -7  -5   -5.40    6.74  52 0.79942-0.15155-0.00807-0.99788-0.31398-0.17851
   6  -2   3   83.32    9.67  52 0.79762 0.23737-0.00502-0.13611-0.31679 0.95567
   6   0   3  111.97    6.81  52 0.79861 0.26194-0.00669 0.14757-0.31525 0.99818
   7  -7  -3    3.28    8.00  52 0.79453 0.09166 0.00015-0.95383-0.32153 0.13448
   7  -6   0   -9.39   11.95  53 0.80132 0.22397-0.01132-0.74781-0.31098 0.53348
   8  -7  -5    7.24    7.23  51 0.79709 0.16142-0.00413-0.96910-0.31760-0.07430
   8  -7  -4   17.08    8.58  52 0.79921 0.20214-0.00772-0.95112-0.31430 0.04940
   8  -2   2   31.54    9.85  52 0.79715 0.51183-0.00423-0.13028-0.31751 0.93058
   8   0   2   -3.18    6.93  51 0.79453 0.53355 0.00015 0.14735-0.32153 0.97178
   9  -6  -2  -10.83    8.07  52 0.79453 0.45926 0.00015-0.76707-0.32153 0.38502
   9  -3   1    8.38    9.91  52 0.79674 0.61160-0.00354-0.27683-0.31815 0.82744
   9   1   1    0.88    6.00  53 0.80455 0.65982-0.01693 0.30223-0.30578 0.90896
  10  -6  -7   29.16    4.71  52 0.79709 0.40607-0.00413-0.84333-0.31760-0.20791
  10  -6  -4   -6.22    5.85  52 0.79488 0.52376-0.00044-0.79449-0.32099 0.17263
  10  -3   0   -3.12    8.61  52 0.79936 0.72603-0.00796-0.27923-0.31407 0.74706
  10   1   0   -5.08    5.37  54 0.80786 0.77520-0.02278 0.30256-0.30033 0.82802
  11  -5  -4   -8.83    4.88  52 0.79375 0.69632 0.00144-0.64404-0.32271 0.24619
  11  -1  -1   -4.92    5.46  52 0.79697 0.87426-0.00393-0.01471-0.31779 0.71525
  11   0  -1    7.54    5.28  53 0.80217 0.87911-0.01279 0.14353-0.30962 0.73243
  12  -4  -5   11.57    3.85  52 0.79923 0.82394-0.00774-0.49284-0.31428 0.18698
  12  -2  -3    3.66    3.99  52 0.79512 0.93451-0.00083-0.17793-0.32063 0.49313
   1  -4  -1    2.04    4.87  53 0.80688-0.74034-0.02122-0.54824-0.30191 0.13746
   3  -5   1   91.94    7.67  52 0.80092-0.35349-0.01082-0.63154-0.31156 0.48098
   4  -6   0  -24.99    8.21  53 0.80052-0.25276-0.01014-0.78234-0.31219 0.37948
   4  -3   3   -8.31    7.73  53 0.80131-0.09148-0.01149-0.29915-0.31094 0.82697
   5  -7  -4   -1.34    7.89  54 0.80975-0.27742-0.02636-0.97614-0.29712-0.11836
   5  -7  -3   -4.44    8.34  52 0.80125-0.22825-0.01139-0.96166-0.31103 0.02410
   5  -3   3   14.04    8.50  52 0.80062 0.06646-0.01030-0.28579-0.31204 0.87921
   6  -7  -2   -1.37    8.59  53 0.80137-0.03784-0.01160-0.93483-0.31084 0.19864
   7  -7  -6  159.16    6.76  53 0.80698-0.04174-0.02139-0.98995-0.30175-0.26651
   7  -7  -2  -12.60   10.43  53 0.80452 0.11532-0.01706-0.91724-0.30578 0.24292
   7  -4   2    4.75   10.07  53 0.80151 0.32542-0.01184-0.41802-0.31062 0.82818
   8  -7  -3   -9.69    9.21  53 0.80480 0.22938-0.01755-0.92322-0.30532 0.16377
  11  -4  -2   28.85    6.25  53 0.80425 0.78702-0.01659-0.43864-0.30622 0.51326
  11  -2  -1    3.54    5.12  53 0.80155 0.85414-0.01190-0.14093-0.31056 0.68921
   1  -3   1   26.86    6.07  53 0.80904-0.64819-0.02495-0.35996-0.29857 0.40937
   3  -6  -4   23.44    4.56  54 0.81172-0.57849-0.02981-0.85730-0.29401-0.19772
   3  -6  -1    7.43    7.59  54 0.81073-0.45674-0.02801-0.79981-0.29570 0.18607
   3   1   3  173.77    3.74  54 0.81281-0.20950-0.03181 0.27249-0.29214 0.84685
   5  -7  -2   25.20    9.46  53 0.80815-0.19416-0.02336-0.93252-0.30005 0.14215
   6  -3   3   16.75   10.80  54 0.81039 0.21344-0.02739-0.25482-0.29628 0.91332
   8  -7  -6  111.29    5.99  53 0.80877 0.11156-0.02447-0.97053-0.29902-0.22097
   8  -5   1  -22.88   11.72  53 0.80771 0.41495-0.02257-0.54797-0.30078 0.71048
   8  -3   2   27.80    9.15  54 0.80801 0.48607-0.02310-0.25313-0.30029 0.88898
   9  -5   0    1.91    8.79  53 0.80724 0.53731-0.02173-0.56084-0.30157 0.64013
  10  -6  -3   18.55    6.14  53 0.80750 0.55885-0.02219-0.74691-0.30114 0.28550
  11  -5  -3   -4.90    5.63  53 0.80771 0.72241-0.02257-0.58944-0.30078 0.35485
  12  -3  -3   25.76    4.41  54 0.81190 0.90395-0.03014-0.28962-0.29371 0.44266
   1  -1   2  470.90    4.94  55 0.81591-0.59058-0.03771-0.05311-0.28668 0.56900
   1   2   1   19.40    0.90  60 0.84315-0.62229-0.09452 0.40799-0.23188 0.45284
   1   3   0   92.83    1.66  56 0.82193-0.62975-0.04926 0.48478-0.27574 0.39120
   2  -5   0   20.96    5.77  54 0.81407-0.56347-0.03427-0.64283-0.28992 0.28090
   3  -3   3   10.04    7.25  54 0.81430-0.26057-0.03470-0.28735-0.28952 0.75433
   5  -6   1   -3.37    9.87  55 0.81443-0.06962-0.03494-0.72400-0.28929 0.53312
   6  -7  -6   34.34    5.62  55 0.81939-0.21182-0.04432-0.97941-0.28043-0.33854
   6  -7  -1   -6.54    9.17  55 0.81515-0.00417-0.03628-0.89033-0.28802 0.30611
   6  -6   1   27.83   10.58  54 0.81463 0.08939-0.03531-0.70876-0.28894 0.58329
   6  -5   2   39.71   11.03  54 0.81376 0.14413-0.03370-0.55110-0.29046 0.73583
   6   1   3   18.94    5.45  55 0.81968 0.25101-0.04489 0.32649-0.27989 0.98168
   7  -1   3   51.04    8.47  55 0.81783 0.38473-0.04134 0.05529-0.28325 0.99208
   8  -7  -2    4.14    9.72  54 0.81427 0.26574-0.03463-0.87932-0.28958 0.27840
   8  -6   0   15.07    9.09  54 0.81401 0.36196-0.03416-0.70186-0.29003 0.55821
   8   1   2   67.28    6.01  55 0.81928 0.52462-0.04410 0.33404-0.28064 0.95631
   9  -7  -5    9.31    6.15  54 0.81563 0.29907-0.03718-0.92408-0.28718-0.05563
   9  -7  -4   -2.72    7.14  55 0.81731 0.33111-0.04036-0.90754-0.28418 0.06326
   9  -6  -1   12.30    8.33  55 0.81444 0.47783-0.03495-0.70964-0.28928 0.47899
   9  -4   1   -7.75    9.82  55 0.81687 0.58052-0.03951-0.38904-0.28498 0.77134
  10  -5  -1   23.08    6.58  54 0.81378 0.64635-0.03373-0.55544-0.29043 0.55298
  11  -3  -1    7.51    5.36  54 0.81330 0.82675-0.03284-0.26016-0.29126 0.64668
  12  -4  -4    4.14    3.40  54 0.81486 0.84885-0.03573-0.44510-0.28854 0.28843
   1   0   2  191.89    3.09  55 0.82092-0.58290-0.04733 0.09855-0.27773 0.58311
   2  -1   3   -6.01    5.73  56 0.82237-0.39953-0.05017-0.00431-0.27503 0.73685
   4  -6   1  -15.22   10.92  56 0.82319-0.23469-0.05179-0.71931-0.27349 0.46751
   4  -4   3  -29.91   11.53  56 0.82319-0.12743-0.05179-0.39965-0.27349 0.76596
   5  -7  -5   -9.25    5.59  57 0.82581-0.33486-0.05700-0.96650-0.26850-0.27526
   5  -7  -1   41.48    8.78  56 0.82029-0.16735-0.04611-0.89301-0.27889 0.24819
   5  -4   3   38.93    9.49  55 0.82001 0.03302-0.04556-0.39104-0.27941 0.82206
   7  -7  -1   46.41    9.15  56 0.81973 0.14657-0.04503-0.86866-0.27992 0.34913
   7  -2   3   44.07    8.19  55 0.81944 0.37189-0.04446-0.08436-0.28045 0.96845
   9  -7  -3    2.85    7.80  56 0.82334 0.37364-0.05208-0.87107-0.27320 0.18525
  10  -4   0    8.23    6.96  55 0.81855 0.69472-0.04277-0.38559-0.28206 0.69297
   0  -2  -1    1.66    1.62  59 0.83754-0.90321-0.08219-0.22236-0.24431 0.07279
   1  -4   0  582.70    6.05  57 0.82784-0.71997-0.06154-0.49243-0.26434 0.22544
   2  -4   2  251.37    8.68  57 0.82904-0.48374-0.06400-0.43432-0.26196 0.52912
   2  -2   3  521.54    7.52  57 0.82793-0.41749-0.06170-0.13426-0.26417 0.70236
   2   0   3   19.24    4.12  57 0.83074-0.39548-0.06754 0.15261-0.25855 0.74201
   3  -6   0    4.44    6.96  56 0.82536-0.43103-0.05651-0.74990-0.26916 0.28759
   4  -7  -3  -11.49    7.50  58 0.83128-0.41758-0.06867-0.92414-0.25746-0.08073
   4  -7  -2    2.70    8.23  56 0.82754-0.36960-0.06092-0.90662-0.26493 0.05588
   6  -4   3   -2.60    9.96  57 0.82709 0.18375-0.06000-0.36367-0.26582 0.86058
   7  -6   1   -0.67    9.94  56 0.82422 0.23665-0.05423-0.67806-0.27135 0.61698
   7  -5   2   -0.39   10.05  57 0.82576 0.28880-0.05730-0.51434-0.26840 0.76407
   7  -3   3    0.84   10.73  56 0.82622 0.35100-0.05823-0.20962-0.26751 0.93071
   7   0   3   45.95    6.58  57 0.82876 0.38758-0.06342 0.21766-0.26252 0.99543
   8  -4   2   42.50    9.23  56 0.82466 0.45782-0.05509-0.36213-0.27052 0.83823
   9  -7  -6    1.46    4.89  57 0.82958 0.24964-0.06511-0.92594-0.26090-0.21179
  10  -6  -2    1.44    6.14  57 0.82576 0.58454-0.05730-0.69596-0.26840 0.38158
  11  -6  -5   13.67    4.26  57 0.82973 0.61174-0.06543-0.73248-0.26059 0.03883
   0  -1   0   68.70    1.29  58 0.83300-0.84596-0.07230-0.07264-0.25392 0.23077
   1  -2   2   -5.41    4.94  57 0.83058-0.61749-0.06718-0.16221-0.25887 0.52042
   3  -5   2   -7.08    8.56  58 0.83141-0.34425-0.06893-0.55698-0.25718 0.55072
   5  -7   0    8.63   11.40  59 0.83616-0.14050-0.07913-0.84582-0.24728 0.34499
   6  -7   0   62.16    9.88  57 0.83116 0.02138-0.06840-0.83683-0.25769 0.40537
   8  -7  -1    8.84    8.71  58 0.83139 0.29249-0.06889-0.83143-0.25722 0.37553
   9  -7  -2   27.18    8.09  58 0.83375 0.40262-0.07390-0.82896-0.25237 0.29225
   9  -2   2   13.74    8.39  57 0.83222 0.62709-0.07063-0.04922-0.25553 0.91169
   9  -1   2   46.81    6.94  58 0.83596 0.64097-0.07870 0.10128-0.24769 0.92993
  10  -2   1   20.08    6.67  58 0.83350 0.74770-0.07336-0.05296-0.25289 0.83702
  10  -1   1  -11.98    5.87  58 0.83387 0.75768-0.07415 0.08757-0.25212 0.85713
  11  -6  -4    9.93    4.69  58 0.83373 0.64692-0.07385-0.70145-0.25241 0.15877
  11  -5  -2    0.55    4.75  58 0.83097 0.74375-0.06799-0.53134-0.25809 0.44051
  11  -4  -1   11.16    5.04  57 0.83137 0.79689-0.06885-0.36574-0.25726 0.59031
  12  -4  -3   -1.56    3.87  58 0.83439 0.86951-0.07527-0.38571-0.25103 0.37913
   2  -5   1  117.51    6.64  58 0.83650-0.54530-0.07947-0.57998-0.24689 0.36463
   3  -6  -5   11.10    3.34  61 0.84770-0.65615-0.10555-0.80241-0.22120-0.39861
   3  -4   3   46.81    8.31  58 0.83672-0.29610-0.07995-0.38469-0.24642 0.69057
   4  -7  -4   68.13    6.13  60 0.84232-0.46603-0.09266-0.92144-0.23397-0.22898
   4  -7  -1   55.92    8.01  58 0.83610-0.33603-0.07858-0.87373-0.24776 0.17061
   5  -6   2  -32.73   12.93  59 0.83942-0.05254-0.08598-0.65174-0.24053 0.61285
   7  -7   0   83.20    9.55  58 0.83631 0.17156-0.07905-0.81317-0.24730 0.44534
   7  -4   3   55.13   11.43  59 0.83972 0.32267-0.08668-0.32261-0.23984 0.88321
   8  -6   1   -5.71   10.52  59 0.83903 0.37786-0.08510-0.63324-0.24139 0.63665
   9  -6   0    3.57    7.52  58 0.83627 0.49561-0.07895-0.64510-0.24740 0.56421
   9  -5   1   -2.04    8.14  58 0.83665 0.54781-0.07979-0.48312-0.24658 0.71244
   9  -3   2   15.96    9.02  59 0.84067 0.61187-0.08883-0.17278-0.23773 0.87779
  10  -5   0   42.73    7.94  59 0.83826 0.65987-0.08339-0.48365-0.24307 0.62864
  10  -3   1  -12.94    7.49  59 0.83903 0.72745-0.08510-0.18227-0.24139 0.80188
   0   1  -1  211.11    1.59  60 0.84443-0.87401-0.09774 0.21578-0.22900 0.12247
   2  -3   3  599.63    7.32  59 0.84181-0.44247-0.09158-0.24610-0.23508 0.65152
   3  -6   1  119.74    7.98  59 0.84185-0.40637-0.09166-0.69319-0.23500 0.37941
   4  -2   4  -11.71    6.60  60 0.84122-0.08235-0.09022-0.05972-0.23641 0.90166
   4  -1   4   13.80    5.60  60 0.84174-0.06601-0.09142 0.08396-0.23524 0.92371
   4   2   3   33.80    2.31  61 0.84993-0.07765-0.11127 0.50827-0.21555 0.84175
   5  -5   3   11.57   10.71  59 0.84173-0.00027-0.09138-0.48646-0.23528 0.75719
   5  -2   4   26.96    7.09  59 0.84114 0.07864-0.09002-0.04543-0.23661 0.95332
   5  -1   4   40.00    7.32  59 0.84215 0.08988-0.09236 0.09779-0.23431 0.97168
   5   2   3   -5.81    2.72  62 0.85296 0.07658-0.11912 0.53161-0.20769 0.88659
   6  -6   2   16.48   10.71  59 0.84134 0.10387-0.09050-0.63581-0.23614 0.65967
   8  -5   2   -1.35    8.89  60 0.84222 0.42466-0.09252-0.46306-0.23415 0.77891
  10  -7  -5    0.73    4.62  60 0.84283 0.43036-0.09395-0.85725-0.23275-0.06044
  10  -7  -4    4.03    5.19  59 0.84164 0.46999-0.09118-0.83752-0.23547 0.06999
  10  -6  -1   18.02    5.96  59 0.84204 0.60472-0.09211-0.63734-0.23456 0.47335
  10   0   1    1.72    5.16  61 0.84853 0.76039-0.10773 0.26691-0.21908 0.84812
  11  -6  -3   -7.11    4.77  60 0.84447 0.67795-0.09784-0.65815-0.22890 0.26280
  11  -2   0    3.27    4.85  60 0.84422 0.85410-0.09723-0.03472-0.22950 0.73585
  11  -1   0   16.05    4.81  60 0.84494 0.86116-0.09894 0.11033-0.22781 0.75541
   1  -4   1 1590.54    7.80  61 0.84950-0.70162-0.11041-0.42324-0.21651 0.30515
   4  -7   0   18.27    8.05  60 0.84635-0.30776-0.10260-0.83172-0.22428 0.27019
   4  -6   2   13.55   10.14  60 0.84608-0.21278-0.10194-0.64701-0.22494 0.55196
   4  -3   4  167.61    7.99  60 0.84657-0.09372-0.10314-0.18772-0.22375 0.86645
   5  -7  -6    6.96    4.56  63 0.85577-0.40536-0.12692-0.91282-0.19993-0.47208
   5  -3   4   36.91    8.42  60 0.84633 0.05972-0.10256-0.17346-0.22432 0.91816
   6  -7   1   11.28   12.14  61 0.84819 0.04354-0.10714-0.77900-0.21977 0.49253
   6  -5   3    4.95   10.16  60 0.84561 0.15250-0.10081-0.46419-0.22606 0.79882
   6  -2   4   23.18    9.26  61 0.84976 0.22655-0.11108-0.00999-0.21585 0.98264
   7  -8  -3   -0.77    8.28  60 0.84640 0.02493-0.10273-0.98352-0.22415 0.01496
   7  -6   2   49.40   11.73  60 0.84689 0.25110-0.10393-0.60401-0.22297 0.69101
   8  -7   0   22.73    8.25  60 0.84640 0.31708-0.10273-0.77445-0.22415 0.46851
   8  -3   3  -23.27    9.40  61 0.84894 0.48438-0.10901-0.14874-0.21791 0.93152
   8  -2   3   26.78    6.97  60 0.84601 0.50136-0.10178-0.01191-0.22510 0.96359
   8  -1   3   11.85    7.48  61 0.84900 0.51007-0.10915 0.13566-0.21777 0.97758
   9  -7  -1   13.50    8.16  60 0.84724 0.43029-0.10477-0.77836-0.22213 0.38862
   9   0   2   -8.31    5.29  61 0.84802 0.64012-0.10670 0.26939-0.22021 0.92452
  10  -7  -3   -3.90    5.59  61 0.84860 0.50208-0.10816-0.80710-0.21876 0.17741
  11  -3   0   86.22    5.51  60 0.84709 0.83353-0.10442-0.16543-0.22248 0.70299
   0   1  -2  658.85    2.43  61 0.85109-0.92273-0.11473 0.21162-0.21201-0.02278
   1  -3   2 3893.93    8.68  61 0.85010-0.64978-0.11217-0.26056-0.21456 0.45387
   2  -6  -2  338.41    5.83  63 0.85575-0.69791-0.12714-0.73492-0.19952-0.08791
   2  -6  -1  217.32    6.47  62 0.85439-0.65605-0.12345-0.71750-0.20324 0.04535
   3  -2   4   85.38    6.49  61 0.85088-0.24502-0.11417-0.04958-0.21257 0.82814
   3  -1   4   55.50    6.30  62 0.85272-0.23410-0.11897 0.09785-0.20775 0.84647
   4   0   4  -21.16    5.31  62 0.85302-0.06253-0.11977 0.25222-0.20694 0.91819
   5  -7   1  133.24   10.15  61 0.85003-0.11365-0.11199-0.78794-0.21475 0.44061
   5   0   4    1.31    5.59  61 0.85168 0.09054-0.11625 0.26271-0.21048 0.96535
   6  -8  -3   21.57    7.73  62 0.85308-0.13647-0.11992-0.99100-0.20680-0.05239
   6  -8  -2   32.68    8.81  61 0.85146-0.09402-0.11568-0.96849-0.21105 0.08055
   6  -3   4  -34.45   10.58  62 0.85292 0.21036-0.11952-0.14623-0.20720 0.95082
   6  -1   4  184.68    7.94  62 0.85257 0.23705-0.11858 0.14000-0.20815 0.99627
   7  -8  -4   16.35    6.66  63 0.85460-0.02003-0.12401-0.99770-0.20268-0.13445
   7  -8  -2   81.92    8.79  62 0.85165 0.06186-0.11616-0.95755-0.21057 0.12941
   7  -7   1   -4.35   11.51  63 0.85512 0.19636-0.12541-0.75408-0.20127 0.52868
   8  -8  -4    3.26    6.87  62 0.85457 0.13336-0.12392-0.97554-0.20276-0.08369
   8  -8  -3   34.58    7.39  62 0.85276 0.17545-0.11908-0.95716-0.20764 0.05014
   9  -4   2   10.61    7.65  61 0.85016 0.58854-0.11234-0.29012-0.21439 0.83152
  10  -4   1  148.17    6.55  61 0.85019 0.70513-0.11241-0.29393-0.21433 0.75474
  11  -5  -1    1.05    5.14  61 0.85125 0.76416-0.11514-0.46000-0.21159 0.52289
   0  -1  -3   12.06    1.31  63 0.85722-0.99357-0.13150-0.07196-0.19506-0.21038
   0   0  -3  491.47    2.24  63 0.85782-0.98173-0.13320 0.06887-0.19333-0.19078
   2  -5   2  917.20    9.97  63 0.85641-0.52321-0.12925-0.51027-0.19735 0.44260
   3  -3   4   20.30    8.87  64 0.85910-0.26313-0.13689-0.17114-0.18958 0.79170
   4  -4   4  -15.20   10.95  63 0.85731-0.12088-0.13177-0.30054-0.19479 0.81498
   5  -4   4   45.73    9.34  62 0.85532 0.04012-0.12624-0.29095-0.20039 0.87099
   6  -8  -4   14.07    6.42  63 0.85651-0.18100-0.12954-0.99553-0.19705-0.18907
   6  -8  -1   22.65    9.79  64 0.85840-0.05979-0.13488-0.93690-0.19163 0.18851
   7  -8  -1   63.54    9.64  63 0.85768 0.09714-0.13283-0.91916-0.19372 0.24144
   7  -5   3   21.61    9.52  62 0.85453 0.29942-0.12409-0.42711-0.20256 0.82469
   8  -8  -2  -14.98    8.13  64 0.85910 0.21255-0.13689-0.92823-0.18958 0.15901
   8  -4   3   30.88   10.15  63 0.85655 0.46438-0.12963-0.26570-0.19696 0.88876
   9  -6   1   12.70    8.59  63 0.85644 0.51412-0.12932-0.57345-0.19727 0.64041
  10  -7  -2   -5.14    5.83  63 0.85713 0.53181-0.13125-0.76566-0.19532 0.28053
  11  -6  -2   -2.41    4.50  63 0.85725 0.70159-0.13160-0.61107-0.19496 0.35210
   0  -2   0    8.89    2.56  64 0.86031-0.88486-0.14087-0.14149-0.18549 0.14146
   2  -6   0   20.00    5.94  63 0.85902-0.62169-0.13709-0.68083-0.18935 0.15827
   2  -4   3  203.21    7.81  63 0.85841-0.47402-0.13534-0.34182-0.19113 0.58596
   2   3   1   32.57    1.22  67 0.87071-0.48042-0.17522 0.64534-0.14995 0.44312
   3  -7  -2   43.79    6.36  64 0.86078-0.55981-0.14227-0.84392-0.18406-0.07271
   3  -7  -1  109.70    7.62  64 0.86009-0.51740-0.14024-0.82612-0.18614 0.05564
   3  -6   2   -5.60    8.72  63 0.85898-0.38240-0.13698-0.62913-0.18946 0.46186
   4  -7   1   32.75    8.77  63 0.85834-0.27897-0.13512-0.77943-0.19136 0.36674
   5  -8  -2    3.67    8.45  65 0.86272-0.26214-0.14819-0.96018-0.17800-0.00348
   5  -6   3    0.54   13.63  63 0.85898-0.03177-0.13699-0.57600-0.18946 0.68299
   6  -4   4   98.55   11.64  64 0.85990 0.19169-0.13968-0.26492-0.18672 0.90722
   7  -8  -5   14.21    5.51  65 0.86353-0.07167-0.15072-0.98852-0.17540-0.29078
   8  -8  -5   37.75    5.58  64 0.86137 0.08512-0.14403-0.97508-0.18226-0.23228
   8  -6   2   15.97   10.21  64 0.86057 0.39712-0.14165-0.55691-0.18470 0.70768
   8   0   3   78.94    6.10  64 0.86201 0.51157-0.14599 0.31713-0.18026 0.96345
  10  -6   0    4.80    6.59  63 0.85914 0.62469-0.13745-0.57172-0.18898 0.55409
  11  -4   0   -3.48    4.58  64 0.85915 0.81251-0.13747-0.27830-0.18897 0.65231
   1  -5  -1   -1.04    5.08  67 0.86929-0.81994-0.16963-0.55120-0.15576-0.03352
   2  -6  -3  101.79    3.95  66 0.86738-0.75078-0.16295-0.71914-0.16271-0.25227
   3  -7   0   74.61    8.76  65 0.86471-0.48190-0.15408-0.79188-0.17188 0.17006
   3   0   4  299.10    5.14  65 0.86417-0.23192-0.15236 0.27207-0.17366 0.83410
   4  -7  -5    4.51    4.11  66 0.86765-0.53408-0.16386-0.87268-0.16177-0.43249
   5  -8  -3    6.08    6.81  65 0.86477-0.30494-0.15428-0.97146-0.17168-0.13854
   5  -8  -1   -3.86    8.03  65 0.86316-0.22128-0.14915-0.93278-0.17696 0.12279
   5  -7   2   94.40   12.54  65 0.86402-0.08856-0.15186-0.72523-0.17417 0.52477
   6  -8   0   -3.95   10.54  64 0.86277-0.02567-0.14796-0.89153-0.17818 0.29918
   6  -7   2   28.75   12.20  64 0.86324 0.06857-0.14940-0.71371-0.17670 0.57471
   6  -6   3   -6.85   10.32  64 0.86277 0.12312-0.14796-0.55767-0.17818 0.72805
   6   0   4   53.11    5.74  65 0.86476 0.23608-0.15426 0.31536-0.17170 0.98243
   7  -3   4   84.19    9.89  65 0.86442 0.35437-0.15314-0.09461-0.17286 0.96687
   7  -2   4    8.95    8.53  65 0.86328 0.36861-0.14955 0.04224-0.17655 0.99173
   8  -8  -1   18.53    8.62  64 0.86309 0.24410-0.14896-0.88690-0.17715 0.27088
   8  -7   1   22.50    8.42  64 0.86277 0.34210-0.14796-0.71197-0.17819 0.55145
   9  -8  -4    9.01    4.97  65 0.86445 0.27920-0.15326-0.93162-0.17273-0.06454
   9  -8  -3    2.58    5.42  66 0.86603 0.32111-0.15840-0.91183-0.16742 0.05800
   9  -7   0    2.97    6.59  64 0.86206 0.45810-0.14578-0.72030-0.18042 0.47596
   9  -5   2   -5.58    7.07  65 0.86268 0.56242-0.14768-0.40269-0.17847 0.77047
  10  -5   1   -4.59    5.88  64 0.86277 0.67754-0.14796-0.40120-0.17818 0.69430
   1  -5   0   13.74    5.75  65 0.86681-0.77101-0.16068-0.52753-0.16509 0.10593
   1  -4   2 1370.67    8.59  66 0.86771-0.67857-0.16373-0.34997-0.16192 0.37857
   2  -6   1    9.02    8.46  66 0.86859-0.59049-0.16681-0.63700-0.15873 0.25525
   3  -7  -3  540.94    6.17  66 0.86892-0.60786-0.16797-0.84104-0.15752-0.22980
   3  -4   4   68.23    8.84  65 0.86588-0.28481-0.15756-0.28794-0.16832 0.74023
   4  -6   3  137.55   11.35  65 0.86572-0.19430-0.15702-0.57562-0.16887 0.62159
   5  -8   0   -1.83   10.47  66 0.86746-0.18525-0.16288-0.89431-0.16281 0.23550
   5  -5   4   27.38   10.18  65 0.86633 0.01412-0.15907-0.39755-0.16676 0.81338
   7  -8   0    8.25    8.23  66 0.86669 0.12856-0.16027-0.87456-0.16552 0.33926
   7  -1   4   -2.60    6.95  66 0.86753 0.37508-0.16312 0.19650-0.16256 0.99746
   8  -5   3   -1.97    9.87  65 0.86633 0.44049-0.15907-0.37587-0.16676 0.83434
   9  -8  -2    2.73    6.22  65 0.86633 0.35412-0.15907-0.87936-0.16676 0.18264
  10  -7  -1  -11.60    5.57  66 0.86790 0.56199-0.16439-0.71468-0.16124 0.37257
   1  -5  -2   31.48    3.48  68 0.87275-0.86055-0.18221-0.55144-0.14272-0.17092
   1  -2   3  224.36    5.65  66 0.86939-0.61599-0.16952-0.04097-0.15602 0.54445
   1  -1   3    7.75    5.27  67 0.87162-0.60700-0.17781 0.10957-0.14734 0.55729
   2  -2   4  540.55    6.68  66 0.86948-0.41808-0.16985-0.00678-0.15567 0.72275
   3  -7   1   15.77    9.92  67 0.87173-0.44872-0.17824-0.74999-0.14689 0.27047
   4  -7   2   16.57    9.60  66 0.86955-0.24904-0.17012-0.72078-0.15540 0.45726
   4  -5   4   20.62   10.76  66 0.86927-0.14276-0.16910-0.40336-0.15645 0.75724
   5  -8  -4    9.76    5.99  67 0.87236-0.35301-0.18066-0.96069-0.14435-0.29297
   6  -8  -5   -4.32    4.86  67 0.87150-0.23681-0.17733-0.97166-0.14785-0.36765
   6  -5   4   -2.93    9.88  67 0.86976 0.16654-0.17087-0.37752-0.15461 0.85157
   7  -7   2   17.28    8.93  66 0.86892 0.22046-0.16786-0.68639-0.15775 0.60914
   7  -6   3   24.65    9.65  67 0.86941 0.27359-0.16962-0.52387-0.15591 0.75782
   7  -4   4   55.08    9.07  66 0.86944 0.33784-0.16972-0.21954-0.15581 0.92780
   9  -3   3  -12.05    7.21  68 0.87255 0.62098-0.18143-0.05995-0.14354 0.91166
   9  -2   3    2.20    7.07  68 0.87259 0.63218-0.18157 0.08173-0.14339 0.93238
  10  -3   2   30.15    5.91  67 0.87079 0.73904-0.17468-0.07060-0.15062 0.83817
  10  -2   2  -10.81    5.15  67 0.87096 0.75196-0.17529 0.06087-0.14999 0.85846
  11  -6  -1   -1.00    4.22  68 0.87249 0.73789-0.18118-0.53986-0.14379 0.43547
  11  -5   0    6.85    4.87  68 0.87176 0.78893-0.17835-0.37907-0.14678 0.58739
   1  -5   1  328.34    7.32  68 0.87449-0.73886-0.18908-0.48492-0.13547 0.20309
   1  -3   3   54.51    7.69  68 0.87431-0.63384-0.18835-0.16147-0.13623 0.50317
   2  -5   3  353.32    8.85  67 0.87268-0.49744-0.18172-0.43646-0.14324 0.51585
   2  -3   4  210.96    7.25  67 0.87234-0.43390-0.18041-0.13739-0.14462 0.68928
   2  -1   4   10.90    4.92  67 0.87257-0.40935-0.18128 0.14670-0.14370 0.73197
   3  -6   3   37.85   12.65  67 0.87281-0.35555-0.18224-0.55911-0.14269 0.54113
   3   2   3    4.88    1.60  70 0.87780-0.26243-0.20399 0.58635-0.11959 0.69548
   4  -8  -1   21.21    8.67  68 0.87453-0.38815-0.18928-0.90632-0.13526 0.03305
   6  -8   1   -7.98   11.00  69 0.87522 0.00758-0.19221-0.84638-0.13215 0.38733
   8  -8   0    5.43    7.23  67 0.87255 0.27816-0.18119-0.83900-0.14379 0.36653
   0   0  -2  234.82    1.44  69 0.87582-0.95906-0.19466 0.15018-0.12958-0.12738
   2  -6   2   20.58    9.48  68 0.87570-0.55436-0.19411-0.58288-0.13016 0.35134
   4  -8  -2   10.66    7.09  69 0.87638-0.43213-0.19715-0.92263-0.12693-0.10617
   4  -8   0  -14.28    9.69  69 0.87654-0.35670-0.19789-0.87559-0.12614 0.14572
   4  -3   5  -16.24    9.72  69 0.87708-0.08432-0.20039-0.06963-0.12347 0.89873
   4  -2   5   11.00    8.38  69 0.87678-0.07204-0.19897 0.07070-0.12499 0.92057
   5  -8   1   11.59    9.12  68 0.87521-0.15177-0.19197-0.84977-0.13244 0.33300
   5  -3   5   12.79   10.17  68 0.87567 0.07130-0.19398-0.06155-0.13030 0.94832
   5  -2   5   40.47    8.75  68 0.87578 0.08191-0.19447 0.07881-0.12979 0.96869
   7  -8   1   54.84    8.30  68 0.87527 0.15876-0.19224-0.82026-0.13215 0.43412
   7  -5   4  -17.46   10.70  69 0.87642 0.31770-0.19732-0.33951-0.12674 0.87419
   8  -7   2  -25.75    8.84  68 0.87522 0.36616-0.19203-0.64320-0.13237 0.62834
   9  -8  -1   20.73    5.42  69 0.87500 0.39279-0.19107-0.83733-0.13339 0.27858
   9  -7   1   33.68    6.15  68 0.87484 0.48506-0.19038-0.65563-0.13412 0.55596
   9  -6   2   -0.18    6.58  69 0.87503 0.53644-0.19123-0.50118-0.13322 0.70136
   9  -4   3   11.22    7.40  69 0.87551 0.60359-0.19328-0.18904-0.13104 0.87453
   9  -1   3    5.12    5.62  70 0.87837 0.63910-0.20658 0.24848-0.11685 0.92786
  10  -6   1   -1.59    5.87  68 0.87556 0.65096-0.19352-0.49576-0.13079 0.62297
  10  -4   2   10.80    5.09  68 0.87484 0.72002-0.19038-0.19691-0.13412 0.80011
   0  -3   0   40.21    3.46  70 0.87952-0.91651-0.21270-0.21163-0.11018 0.04493
   0  -2   1  678.40    3.77  69 0.87768-0.86203-0.20338-0.06326-0.12019 0.20206
   2  -4   4   33.55    8.16  69 0.87779-0.45273-0.20389-0.25329-0.11964 0.64045
   3  -7   2  -17.63   10.74  70 0.87876-0.41892-0.20871-0.69765-0.11447 0.36295
   5  -7   3   31.03   10.43  69 0.87717-0.06176-0.20094-0.66026-0.12280 0.60094
   5  -6   4    2.03   10.43  70 0.87773-0.00725-0.20359-0.49610-0.11996 0.74827
   5  -4   5   -3.72   11.25  69 0.87759 0.05474-0.20295-0.19143-0.12065 0.91123
   6  -7   3   10.83   10.19  70 0.87756 0.09614-0.20278-0.64476-0.12083 0.64956
   7   0   4   55.70    5.72  70 0.87989 0.37840-0.21472 0.39052-0.10799 0.96808
   8  -6   3   48.11    8.08  69 0.87767 0.41876-0.20334-0.47574-0.12023 0.77027
   8  -3   4   29.13    8.35  70 0.87795 0.49620-0.20468-0.03135-0.11879 0.96090
   8  -2   4    0.67    6.99  71 0.87973 0.50958-0.21385 0.11889-0.10893 0.97711
  10  -7   0    4.70    5.01  70 0.87875 0.60124-0.20869-0.64631-0.11450 0.46088
   0  -3  -1   61.10    2.42  71 0.88113-0.95911-0.22222-0.22513-0.09976-0.09478
   0  -1   1  201.21    2.28  70 0.87927-0.85186-0.21179 0.08671-0.11105 0.21617
   1  -4   3  732.54    9.07  71 0.88074-0.65149-0.21990-0.27292-0.10228 0.44642
   3  -3   5   91.94    9.35  71 0.88045-0.24444-0.21825-0.06660-0.10407 0.82532
   3  -2   5  256.82    7.92  71 0.88064-0.23080-0.21931 0.07715-0.10293 0.84761
   4  -8  -3   13.23    5.33  72 0.88121-0.47824-0.22266-0.91671-0.09928-0.26042
   4  -8   1   46.40   10.82  71 0.88050-0.31373-0.21849-0.83747-0.10380 0.25539
   4  -7   3  115.45   10.50  70 0.87971-0.22033-0.21411-0.65778-0.10854 0.53737
   4  -6   4   66.04   10.87  70 0.87947-0.16732-0.21282-0.50083-0.10994 0.68790
   4  -4   5    0.77    8.90  71 0.87955-0.10094-0.21325-0.20042-0.10948 0.85935
   4  -1   5   -1.73    6.51  72 0.88115-0.06330-0.22232 0.23624-0.09966 0.91975
   5  -1   5   76.22    7.04  71 0.88100 0.09275-0.22142 0.24852-0.10063 0.96754
   6  -8   2   20.82   10.87  71 0.88120 0.03979-0.22264-0.78810-0.09930 0.47917
   6  -6   4  -17.98    9.84  71 0.87936 0.14506-0.21223-0.47913-0.11057 0.78777
   6  -3   5   42.36    9.71  70 0.88006 0.22608-0.21601-0.02682-0.10649 0.97965
   6  -2   5   -4.62    8.29  71 0.88071 0.23793-0.21975 0.11366-0.10245 0.99564
   7  -7   3    8.52   10.15  71 0.88102 0.25059-0.22157-0.61420-0.10047 0.68098
   8  -8   1   26.37    8.05  72 0.88109 0.31370-0.22195-0.78448-0.10005 0.45264
   8  -4   4   -2.38    8.59  71 0.88050 0.48536-0.21850-0.16496-0.10380 0.92549
   9  -8   0   17.58    6.13  71 0.88084 0.42631-0.22050-0.78632-0.10163 0.37433
   9  -5   3   -0.06    7.49  70 0.87967 0.58132-0.21390-0.30683-0.10878 0.82503
  10  -5   2   24.71    5.56  71 0.88070 0.70138-0.21966-0.30974-0.10254 0.74669
   1  -5   2  222.87    6.67  71 0.88114-0.70523-0.22275-0.43089-0.09919 0.29427
   1   0   3  135.17    3.59  72 0.88284-0.60561-0.23388 0.30554-0.08703 0.51884
   2   0   4   21.85    4.21  72 0.88246-0.40787-0.23120 0.33703-0.08997 0.69951
   3  -7  -4    4.68    3.48  73 0.88337-0.66471-0.23777-0.79054-0.08275-0.43243
   5  -8   2   -0.46    9.44  71 0.88147-0.11767-0.22478-0.79722-0.09698 0.42564
   6  -4   5   24.05    8.71  71 0.88144 0.21059-0.22461-0.15866-0.09717 0.94683
   7  -9  -2  -12.81    6.56  71 0.88147 0.01849-0.22478-0.98690-0.09698-0.00714
   7  -9  -1   -1.74    7.44  73 0.88308 0.05902-0.23555-0.96268-0.08520 0.10896
  10  -8  -2   -3.10    3.86  71 0.88127 0.50043-0.22354-0.80969-0.09833 0.16603
   0  -3   1 5925.77    7.87  72 0.88315-0.87944-0.23594-0.17196-0.08476 0.14444
   2  -7  -1    7.48    5.97  72 0.88333-0.69619-0.23728-0.73994-0.08329-0.09846
   2  -7   0   -1.50    7.34  73 0.88330-0.65738-0.23706-0.72437-0.08352 0.02883
   2  -6   3  610.43    9.60  72 0.88315-0.52113-0.23594-0.52434-0.08476 0.43376
   3  -4   5   52.73    8.84  72 0.88289-0.26012-0.23407-0.19190-0.08681 0.78732
   3  -1   5   91.19    6.54  73 0.88411-0.22558-0.24348 0.24052-0.07645 0.84255
   4  -5   5    6.15    9.72  73 0.88342-0.11610-0.23798-0.31429-0.08252 0.81087
   5  -5   5  -22.95    9.86  73 0.88296 0.03874-0.23454-0.30766-0.08630 0.86326
   6  -9  -2   20.79    6.77  72 0.88323-0.13897-0.23654-0.99282-0.08410-0.06999
   6  -9  -1   -0.69    8.02  73 0.88408-0.09740-0.24320-0.97548-0.07676 0.05027
   7  -9  -3  -13.25    5.34  73 0.88367-0.02941-0.23991-0.99809-0.08038-0.15669
   7  -8   2   36.42    7.67  73 0.88299 0.19486-0.23481-0.76168-0.08601 0.51771
   7  -6   4   23.28    8.66  72 0.88272 0.29872-0.23283-0.43975-0.08818 0.81619
   8  -9  -3    3.23    5.31  73 0.88379 0.13140-0.24083-0.97579-0.07938-0.10349
   8  -9  -2   -0.20    5.44  74 0.88442 0.17437-0.24614-0.96097-0.07350 0.01913
   8  -5   4  -16.29    8.74  72 0.88308 0.46532-0.23545-0.28017-0.08530 0.88119
   8  -1   4  -15.63    5.35  73 0.88385 0.51854-0.24134 0.28543-0.07881 0.96694
   0   0  -1   97.07    0.81  74 0.88513-0.92760-0.25221 0.22844-0.06671-0.06213
   2  -7   1   16.22    6.96  74 0.88459-0.61786-0.24704-0.69432-0.07246 0.14564
   2  -6  -4   32.86    2.30  77 0.88708-0.81319-0.28598-0.61658-0.02855-0.51575
   3  -8   0   55.79    8.78  74 0.88540-0.51821-0.25514-0.83287-0.06344 0.03967
   3  -7   3  105.91    9.73  73 0.88449-0.38081-0.24617-0.64122-0.07342 0.45237
   4  -8   2    8.70    9.57  73 0.88440-0.27707-0.24541-0.79083-0.07427 0.35303
   5  -7   4   12.46   12.21  73 0.88448-0.02878-0.24610-0.58908-0.07350 0.67363
   6  -9  -3  -10.94    6.03  73 0.88448-0.18054-0.24610-0.99534-0.07350-0.20597
   6  -9   0  103.81    7.98  73 0.88449-0.05887-0.24620-0.94146-0.07340 0.17630
   6  -5   5   41.68    9.57  73 0.88445 0.19435-0.24582-0.27997-0.07381 0.90122
   6  -1   5   26.45    6.30  74 0.88482 0.24516-0.24924 0.29005-0.07001 0.98724
   7  -9   0   34.67    7.79  73 0.88448 0.09821-0.24610-0.92411-0.07350 0.22769
   7  -3   5   -9.89    8.10  73 0.88448 0.37187-0.24610 0.01788-0.07350 0.98832
   8  -9  -1    5.98    6.05  73 0.88453 0.21137-0.24648-0.93152-0.07308 0.14581
   8  -7   3   24.34    8.40  74 0.88525 0.40249-0.25353-0.56801-0.06524 0.69531
   9  -7   2   17.11    5.65  73 0.88425 0.51784-0.24405-0.58289-0.07577 0.62706
  10  -8  -1   -4.03    4.20  73 0.88448 0.53660-0.24610-0.76581-0.07350 0.26830
   1  -6   0  229.09    6.28  75 0.88596-0.80352-0.26137-0.57319-0.05637-0.02482
   1  -5  -3   -0.19    2.04  77 0.88691-0.91579-0.27846-0.47477-0.03705-0.40692
   1  -5   3   83.54    9.24  75 0.88602-0.67030-0.26211-0.36938-0.05554 0.37824
   1  -3   4   49.99    6.70  74 0.88561-0.60372-0.25710-0.07238-0.06115 0.55297
   1  -2   4   -0.25    5.66  75 0.88570-0.59210-0.25810 0.06837-0.06003 0.57448
   2  -3   5   33.70    8.79  75 0.88591-0.40716-0.26076-0.03594-0.05706 0.72750
   3  -8  -1    3.64    7.17  74 0.88558-0.55512-0.25669-0.85175-0.06161-0.08826
   3  -8   1   -3.38    9.46  75 0.88618-0.47606-0.26441-0.80541-0.05296 0.15429
   3  -5   5   18.98   10.36  74 0.88558-0.27696-0.25669-0.30778-0.06161 0.73676
   4  -7   4   59.54   12.84  75 0.88584-0.18620-0.25983-0.59317-0.05810 0.61150
   5  -9  -1   45.40    7.62  74 0.88567-0.25633-0.25779-0.96428-0.06038-0.01425
   5  -9   0   29.50    8.71  74 0.88579-0.21658-0.25924-0.93873-0.05876 0.11026
   5  -8   3   34.99   11.59  75 0.88602-0.08175-0.26210-0.73945-0.05555 0.51149
   6  -8   3   -5.10   10.74  75 0.88605 0.07469-0.26250-0.72621-0.05511 0.56164
   6  -7   4   29.78    9.49  74 0.88551 0.12696-0.25595-0.57083-0.06243 0.71823
   7  -4   5   14.92    7.50  74 0.88558 0.36081-0.25669-0.11368-0.06161 0.96139
   7  -2   5   23.76    7.47  75 0.88613 0.38660-0.26367 0.17658-0.05379 0.99724
   8  -8   2    0.21    7.53  75 0.88593 0.34784-0.26093-0.72155-0.05686 0.53614
   9  -8   1   -2.74    5.55  74 0.88558 0.45950-0.25669-0.72781-0.06161 0.46160
   9  -6   3    7.00    5.47  75 0.88556 0.56918-0.25653-0.40849-0.06179 0.76245
  10  -7   1    0.99    4.13  75 0.88558 0.63349-0.25669-0.57713-0.06161 0.53566
  10  -6   2    2.04    4.83  74 0.88558 0.68043-0.25669-0.41232-0.06161 0.68133
   0  -2   2 1501.33    5.44  75 0.88632-0.83070-0.26565 0.01980-0.05139 0.26188
   0  -1  -2 2508.97    2.45  76 0.88687-0.98275-0.27586 0.08964-0.03984-0.23948
   1  -6  -1  -11.30    5.02  77 0.88694-0.84835-0.27771-0.57285-0.03774-0.17289
   1  -6   1  225.10    6.03  75 0.88635-0.76389-0.26625-0.54870-0.05072 0.09512
   2  -7  -2   21.82    4.30  76 0.88669-0.74266-0.27200-0.72939-0.04421-0.26512
   2  -7   2    8.41    7.92  75 0.88642-0.57882-0.26724-0.65375-0.04960 0.25040
   2  -4   5   -2.04   10.24  76 0.88676-0.41994-0.27353-0.16486-0.04248 0.69282
   2  -2   5  379.67    6.59  75 0.88642-0.39506-0.26724 0.11086-0.04960 0.74405
   4  -8  -4   -8.95    4.30  77 0.88710-0.53019-0.28325-0.86810-0.03142-0.45972
   4  -6   5   50.00   12.81  76 0.88662-0.13163-0.27073-0.42233-0.04566 0.75138
   4   0   5   50.46    4.78  76 0.88678-0.05869-0.27395 0.42680-0.04200 0.88109
   5  -9  -2   11.51    6.54  76 0.88661-0.29812-0.27053-0.97487-0.04588-0.15764
   5  -6   5  -29.94   10.07  76 0.88637 0.02177-0.26648-0.41494-0.05046 0.80574
   5   0   5  456.60    5.86  76 0.88695 0.10057-0.27807 0.44755-0.03733 0.92623
   6  -9   1   49.67    7.87  75 0.88642-0.01974-0.26726-0.90212-0.04958 0.27896
   7  -9   1   30.34    7.82  76 0.88667 0.13537-0.27162-0.88205-0.04465 0.32244
   7  -5   5   -7.89    9.17  76 0.88677 0.34871-0.27365-0.23737-0.04234 0.91982
   8  -9   0   11.38    6.03  76 0.88680 0.25501-0.27445-0.89373-0.04144 0.24396
   8  -6   4   -1.40    8.07  76 0.88668 0.45323-0.27194-0.38737-0.04428 0.82352
   0  -4   0    7.12    4.15  77 0.88709-0.93597-0.28102-0.28331-0.03374-0.05433
   0  -4   1  -16.38    5.73  77 0.88714-0.89614-0.28330-0.25945-0.03113 0.07045
   0  -3   2   36.65    5.24  76 0.88690-0.84256-0.27569-0.10829-0.03980 0.23090
   1  -6   2  343.54    8.93  77 0.88716-0.72347-0.28383-0.51109-0.03052 0.20309
   1  -4   4   23.13    7.69  76 0.88694-0.61710-0.27670-0.19500-0.03865 0.51133
   3  -8  -2   25.11    5.37  77 0.88705-0.59874-0.27989-0.84874-0.03502-0.24560
   3  -8   2   -7.64   10.62  77 0.88716-0.43632-0.28426-0.76642-0.03003 0.25926
   4  -8   3  301.49   10.38  76 0.88698-0.23914-0.27764-0.73772-0.03758 0.44325
   5  -9   1  102.71    8.65  76 0.88696-0.17624-0.27732-0.90497-0.03794 0.21782
   6  -6   5   44.11    9.19  76 0.88693 0.17928-0.27632-0.38957-0.03909 0.84593
   7  -8   3   12.93    7.43  76 0.88695 0.23003-0.27699-0.69789-0.03833 0.59469
   7  -7   4  -13.46    7.53  77 0.88694 0.28105-0.27676-0.54023-0.03858 0.74381
   9  -4   4   -6.27    5.69  77 0.88715 0.63134-0.28345-0.08301-0.03096 0.90018
   9  -3   4    1.55    5.31  77 0.88718 0.64591-0.28501 0.06436-0.02917 0.92407
  10  -8   0    2.70    3.86  78 0.88721 0.58075-0.28717-0.71010-0.02670 0.35134
  10  -4   3   -0.73    4.58  78 0.88722 0.75261-0.28787-0.08094-0.02589 0.82401
   1  -1   4   72.81    4.75  77 0.88719-0.58164-0.28702 0.23842-0.02685 0.56473
   1   2   0  109.43    1.39  78 0.88723-0.70894-0.29310 0.58616-0.01986 0.11187
   2  -1   5    7.13    6.00  79 0.88719-0.38310-0.29735 0.28348-0.01495 0.73253
   3  -7   4   29.93   10.09  77 0.88720-0.34224-0.28752-0.58102-0.02627 0.53271
   3  -6   5   -7.74   13.28  78 0.88723-0.28899-0.29173-0.41541-0.02144 0.67752
   4  -4   6  -38.65   10.50  78 0.88723-0.06760-0.29270-0.10184-0.02032 0.89834
   4  -3   6   -5.29    7.69  77 0.88720-0.05495-0.28794 0.03845-0.02579 0.92453
   5  -9  -3   11.24    5.36  78 0.88717-0.33977-0.29859-0.96195-0.01352-0.31771
   5  -4   6    6.42   10.40  79 0.88721 0.09079-0.29598-0.08160-0.01653 0.94859
   5  -3   6   67.94    9.48  77 0.88722 0.10020-0.28948 0.05334-0.02402 0.97092
   6  -9   2   37.52    9.48  78 0.88723 0.01921-0.29210-0.85378-0.02101 0.37650
   9  -9  -1   -7.61    3.99  78 0.88720 0.35866-0.28781-0.88554-0.02594 0.14135
   0  -4   2    1.00    6.78  78 0.88713-0.85365-0.30096-0.22224-0.01097 0.17717
   0  -1   2  752.25    3.75  78 0.88721-0.82008-0.29592 0.19111-0.01681 0.24860
   2  -7   3   79.44    9.00  78 0.88721-0.53905-0.29613-0.60637-0.01656 0.34529
   3  -3   6   -4.80    9.11  79 0.88705-0.21148-0.30383 0.03840-0.00764 0.85583
   3   0   5   -5.41    4.44  79 0.88710-0.21437-0.30218 0.44324-0.00955 0.79819
   4  -9  -1   55.42    7.07  79 0.88711-0.41300-0.30153-0.93237-0.01031-0.11416
   4  -9   0   15.04    6.98  78 0.88717-0.37400-0.29854-0.91825-0.01378 0.01476
   4  -9   1   44.35    9.59  79 0.88697-0.33265-0.30627-0.89082-0.00480 0.13529
   4  -2   6    8.10    8.22  79 0.88706-0.04177-0.30345 0.19562-0.00808 0.93141
   5  -9   2  265.18   10.60  78 0.88717-0.13517-0.29891-0.86169-0.01335 0.32019
   5  -8   4   19.86   11.38  79 0.88701-0.04329-0.30517-0.67646-0.00607 0.59059
   5  -2   6   59.02    8.00  79 0.88696 0.11275-0.30663 0.20992-0.00437 0.97545
   7  -9   2   -5.43    7.62  80 0.88688 0.17905-0.30846-0.83229-0.00223 0.41072
   7  -6   5  151.93    9.45  78 0.88715 0.33772-0.29968-0.35042-0.01245 0.86662
   7  -1   5    5.00    5.22  79 0.88703 0.39926-0.30462 0.35960-0.00671 0.97403
   8  -9   1   10.93    5.21  78 0.88720 0.29180-0.29663-0.84555-0.01598 0.34434
   9  -8   2   -1.52    4.85  79 0.88705 0.49622-0.30377-0.66825-0.00770 0.52952
   9  -7   3    0.66    5.48  78 0.88717 0.55167-0.29870-0.50504-0.01359 0.68875
   9  -5   4   18.31    5.61  78 0.88716 0.61891-0.29958-0.20298-0.01257 0.86088
  10  -5   3   -7.62    4.46  79 0.88708 0.73624-0.30294-0.21422-0.00867 0.77759
   0  -4  -1   14.46    2.93  80 0.88639-0.97622-0.31778-0.26648 0.00869-0.22426
   1  -6   3 1127.74    9.10  79 0.88688-0.68094-0.30901-0.46634-0.00161 0.30056
   1  -5   4    7.08    8.50  79 0.88700-0.62961-0.30581-0.30715-0.00535 0.45579
   1   2  -1  788.09    2.57  79 0.88694-0.74875-0.30746 0.58120-0.00341-0.03070
   3  -8   3    5.18    9.54  80 0.88685-0.39479-0.30963-0.71970-0.00088 0.35716
   3  -4   6   28.26    8.67  79 0.88693-0.22469-0.30769-0.09638-0.00315 0.83016
   4  -7   5   47.79   10.43  79 0.88689-0.14535-0.30857-0.52328-0.00212 0.68200
   4  -5   6    6.01    9.72  79 0.88693-0.07896-0.30765-0.22452-0.00319 0.85971
   5  -7   5   33.10    9.57  79 0.88699 0.00994-0.30597-0.51580-0.00515 0.73894
   5  -5   6  -13.16    9.09  80 0.88693 0.07582-0.30775-0.21524-0.00308 0.90794
   6  -8   4    2.79    8.62  80 0.88688 0.11512-0.30896-0.66012-0.00167 0.63620
   6  -7   5   12.17   10.09  80 0.88666 0.16809-0.31344-0.49344 0.00358 0.77987
   6  -4   6    4.88    9.22  80 0.88654 0.24962-0.31551-0.04849 0.00602 0.97730
   6  -3   6   12.63    8.19  80 0.88667 0.25841-0.31321 0.09141 0.00332 0.99603
   8  -8   3   -5.69    5.37  80 0.88692 0.38185-0.30790-0.65933-0.00291 0.60388
   8  -7   4    5.08    7.07  79 0.88686 0.43743-0.30925-0.48745-0.00132 0.75529
   8  -4   5   -5.07    5.67  79 0.88693 0.51684-0.30779-0.04776-0.00303 0.95201
   8  -3   5   -0.16    6.13  80 0.88676 0.53018-0.31159 0.09720 0.00141 0.97053
   9  -9   0    6.96    3.91  80 0.88688 0.40764-0.30896-0.83902-0.00166 0.25227
  10  -7   2    4.60    3.87  80 0.88672 0.67114-0.31233-0.49966 0.00228 0.59762
   0  -3   3   90.39    6.01  80 0.88638-0.80229-0.31812-0.04541 0.00907 0.30657
   0  -2   3 1019.31    7.13  81 0.88610-0.78912-0.32188 0.09677 0.01352 0.32416
   1  -6  -2   -7.26    3.58  83 0.88436-0.88645-0.33899-0.53755 0.03392-0.37337
   3  -5   6   34.38   11.79  81 0.88584-0.23481-0.32510-0.22194 0.01733 0.79139
   3  -2   6    4.35    6.38  81 0.88632-0.19742-0.31894 0.19731 0.01004 0.86238
   4  -9  -2   47.93    6.21  81 0.88576-0.45261-0.32598-0.92786 0.01838-0.27002
   4  -9   2  152.74   10.45  80 0.88621-0.28958-0.32046-0.85442 0.01184 0.24396
   4  -8   4    5.87   10.04  80 0.88651-0.19751-0.31605-0.67963 0.00663 0.52740
   6  -5   6  134.69    9.93  81 0.88610 0.23546-0.32194-0.18245 0.01359 0.94104
   8  -5   5   20.26    6.72  80 0.88626 0.50465-0.31986-0.17869 0.01113 0.91524
   0  -4   3  701.89    8.41  82 0.88496-0.81219-0.33371-0.17321 0.02761 0.26617
   1  -4   5   69.18   10.16  82 0.88513-0.57399-0.33211-0.12052 0.02570 0.57314
   1  -3   5   28.51    6.92  81 0.88560-0.56370-0.32743 0.01661 0.02011 0.60108
   2  -8   0    7.66    7.19  82 0.88457-0.67157-0.33702-0.76643 0.03158-0.10841
   2  -8   1   15.49    8.30  81 0.88534-0.63024-0.33011-0.75059 0.02331 0.02756
   2  -7   4   20.25    9.38  81 0.88546-0.49640-0.32888-0.55261 0.02184 0.43410
   3  -8  -3   21.21    4.34  83 0.88420-0.63719-0.34006-0.80864 0.03523-0.44301
   3  -7   5   43.54   10.83  81 0.88546-0.29956-0.32889-0.51483 0.02185 0.60922
   4  -6   6    4.13   10.21  81 0.88547-0.09066-0.32881-0.34232 0.02176 0.80791
   4  -1   6   -1.83    7.11  83 0.88408-0.02601-0.34095 0.37463 0.03630 0.90895
   5  -9   3   10.35    8.23  82 0.88539-0.09311-0.32961-0.81364 0.02271 0.41146
   5  -6   6   10.15    9.24  82 0.88531 0.06654-0.33036-0.32916 0.02361 0.85980
   6  -9   3   17.92    7.34  82 0.88547 0.06315-0.32876-0.80158 0.02170 0.46286
   6  -2   6  -17.01    6.87  82 0.88494 0.27291-0.33383 0.24970 0.02775 0.99410
   7  -8   4   16.96    6.72  81 0.88566 0.27230-0.32670-0.62817 0.01925 0.66487
   8  -9   2    7.00    5.49  83 0.88450 0.34049-0.33767-0.79126 0.03235 0.42745
   8  -2   5   18.27    5.39  82 0.88470 0.54464-0.33599 0.26311 0.03034 0.96266
   9  -6   4    6.55    4.45  82 0.88539 0.60988-0.32961-0.31512 0.02271 0.80530
   0  -5   1  769.72    5.77  82 0.88426-0.90543-0.33883-0.35014 0.03388-0.01839
   0  -5   2   85.78    7.38  83 0.88329-0.86507-0.34596-0.31921 0.04247 0.10321
   0  -3  -2    2.63    1.02  90 0.86896-0.99070-0.40525-0.05950 0.11655-0.43845
   1  -7   1  -21.18    7.46  83 0.88365-0.77548-0.34343-0.61034 0.03942-0.01779
   1  -6   4   24.22   10.89  84 0.88326-0.64006-0.34615-0.41153 0.04270 0.38816
   1  -2   5  104.17    6.17  82 0.88427-0.54856-0.33877 0.16863 0.03380 0.61030
   2  -8   2   52.62    7.92  82 0.88423-0.58877-0.33907-0.72248 0.03416 0.14475
   2  -7  -3   43.25    3.06  84 0.88155-0.77962-0.35660-0.66651 0.05543-0.49398
   2  -4   6    7.16    8.53  83 0.88414-0.37637-0.33977-0.07813 0.03500 0.74240
   2  -3   6   34.14    7.44  82 0.88426-0.36589-0.33886 0.06133 0.03391 0.76416
   3  -8   4  766.29   11.44  82 0.88420-0.34904-0.33926-0.66908 0.03439 0.44767
   4  -9   3    1.33   10.68  82 0.88427-0.24843-0.33873-0.80775 0.03375 0.34654
   5  -1   6   75.15    6.87  83 0.88273 0.13323-0.34960 0.39594 0.04690 0.94920
   6  -6   6  140.08    9.81  83 0.88366 0.22396-0.34338-0.30173 0.03935 0.89339
   7 -10  -1   80.98    5.65  83 0.88336 0.04451-0.34543-0.98815 0.04183-0.04011
   7  -9   3   11.23    7.11  83 0.88389 0.21967-0.34170-0.77288 0.03732 0.49840
   7  -7   5   21.03    7.04  82 0.88455 0.32432-0.33645-0.45646 0.03101 0.80245
   8  -6   5    7.24    6.44  82 0.88427 0.48938-0.33873-0.29756 0.03375 0.86564
   9  -9   1   -4.44    4.00  83 0.88382 0.45353-0.34218-0.78756 0.03790 0.34153
   0  -5   0  -11.46    4.47  84 0.88217-0.94497-0.35337-0.35122 0.05147-0.16244
   1  -7   0   14.77    6.02  84 0.88198-0.81334-0.35448-0.62012 0.05283-0.15519
   1  -7   2   39.27    7.33  83 0.88308-0.73268-0.34771-0.58371 0.04460 0.10931
   2  -8  -1   15.42    6.07  84 0.88136-0.70818-0.35798-0.76294 0.05711-0.26091
   2  -5   6   -8.89   12.32  84 0.88238-0.38680-0.35212-0.20659 0.04996 0.70431
   2  -2   6    5.78    7.63  84 0.88224-0.34974-0.35296 0.21734 0.05098 0.76800
   3  -9   0   18.80    7.52  84 0.88217-0.52421-0.35337-0.87384 0.05148-0.09989
   3  -9   1   -4.58    8.86  84 0.88245-0.48434-0.35174-0.85799 0.04949 0.02964
   3  -6   6   58.59   10.65  83 0.88317-0.24523-0.34714-0.33880 0.04390 0.74023
   3  -1   6    8.82    6.05  83 0.88280-0.18248-0.34957 0.36732 0.04685 0.84046
   5  -8   5   23.98    8.55  83 0.88280 0.00306-0.34955-0.61091 0.04682 0.66344
   6 -10  -1   45.99    5.38  83 0.88275-0.11015-0.34983-0.99718 0.04717-0.09540
   6 -10   0   10.35    5.97  83 0.88298-0.07047-0.34839-0.98074 0.04542 0.03453
   7 -10   0    1.17    5.04  83 0.88290 0.08654-0.34887-0.96608 0.04600 0.08295
   7  -5   6    8.73    7.51  83 0.88261 0.39070-0.35075-0.13844 0.04829 0.95132
   7  -4   6    1.09    5.87  84 0.88300 0.40506-0.34823-0.00289 0.04522 0.98208
   7  -3   6   -5.49    7.03  84 0.88164 0.41986-0.35646 0.14828 0.05525 0.99412
   0  -5   3   55.81    8.23  85 0.88031-0.81923-0.36296-0.28227 0.06316 0.21120
   0  -3   4   25.71    7.92  85 0.87979-0.75580-0.36553 0.02291 0.06633 0.37855
   0  -1   3   -6.54    5.04  85 0.88070-0.77043-0.36101 0.27960 0.06076 0.29934
   0   0   1  102.91    1.20  85 0.88047-0.84110-0.36219 0.37861 0.06221 0.06486
   1  -7   3  279.98   10.06  85 0.88040-0.68910-0.36251-0.55109 0.06261 0.21519
   1   0   4    9.23    4.02  84 0.88124-0.56276-0.35814 0.44847 0.05723 0.50222
   2  -8   3   64.61    8.73  84 0.88146-0.54638-0.35692-0.68492 0.05574 0.25072
   2   0   5  116.37    4.41  85 0.88025-0.36463-0.36329 0.48784 0.06357 0.67431
   3  -9   2   60.99   10.09  84 0.88107-0.44079-0.35906-0.82946 0.05836 0.15017
   4  -8   5  225.49   10.36  84 0.88139-0.15282-0.35730-0.61647 0.05621 0.60643
   4  -7   6  -17.32   11.83  84 0.88125-0.09929-0.35808-0.45105 0.05716 0.74697
   5 -10   0  112.28    6.78  85 0.87971-0.22254-0.36591-0.97595 0.06681-0.03580
   5  -9   4  -18.66    9.88  85 0.88029-0.05248-0.36309-0.76147 0.06332 0.49375
   5  -7   6   13.10   10.66  85 0.88067 0.05833-0.36112-0.43922 0.06090 0.79958
   6 -10   1   11.79    5.70  85 0.88118-0.02712-0.35846-0.95197 0.05763 0.15110
   6  -8   5   -9.75    7.38  85 0.88128 0.15741-0.35792-0.59359 0.05697 0.70105
   7 -10   1    7.07    5.39  86 0.87975 0.13177-0.36572-0.93311 0.06657 0.19098
   8  -8   4  -10.88    5.57  84 0.88125 0.43041-0.35808-0.57966 0.05716 0.67384
   9  -8   3   -0.76    3.76  84 0.88138 0.54772-0.35732-0.58882 0.05624 0.59946
   0  -4   4  -10.43    7.20  86 0.87912-0.76572-0.36857-0.11546 0.07005 0.35089
   2  -7   5   77.49   10.35  85 0.87961-0.45133-0.36627-0.49577 0.06720 0.51581
   3  -9  -1   19.12    6.81  86 0.87726-0.56152-0.37666-0.87293 0.08012-0.25389
   4  -4   7   25.79   10.54  86 0.87887-0.01765-0.36973-0.00071 0.07149 0.93302
   5 -10   1   77.69    7.51  85 0.87894-0.18026-0.36941-0.95446 0.07110 0.08625
   6  -9   4    1.67    7.08  86 0.87933 0.11056-0.36761-0.74300 0.06887 0.54432
   6  -7   6   25.86    9.27  85 0.87870 0.21481-0.37047-0.41341 0.07241 0.83429
   7  -6   6   20.15    7.43  86 0.87810 0.38590-0.37311-0.25815 0.07570 0.90687
   8  -9   3   12.15    4.96  86 0.87829 0.38284-0.37231-0.72802 0.07469 0.51090
   9  -7   4   -8.43    3.95  86 0.87919 0.60103-0.36823-0.42314 0.06963 0.73228
   0  -2   4    5.64    5.73  87 0.87704-0.73898-0.37733 0.17431 0.08096 0.38563
   1  -7  -1  136.68    4.91  88 0.87378-0.84535-0.38953-0.60654 0.09633-0.32819
   1  -1   5    1.94    4.85  87 0.87704-0.53164-0.37732 0.34776 0.08095 0.58373
   2  -8   4    1.43   11.65  86 0.87693-0.49941-0.37778-0.64128 0.08152 0.35090
   2  -6   6   27.49   10.92  86 0.87750-0.39733-0.37541-0.32301 0.07856 0.65382
   3  -9   3  139.51    9.40  86 0.87731-0.39805-0.37623-0.79301 0.07958 0.25664
   3  -8   5  642.51   11.76  86 0.87723-0.30308-0.37653-0.61175 0.07996 0.53265
   3  -7   6  -20.32   10.54  87 0.87696-0.25428-0.37763-0.45186 0.08133 0.67644
   3  -4   7  -22.27   10.22  87 0.87611-0.17231-0.38102-0.00713 0.08558 0.87083
   4  -9  -3   13.69    4.41  88 0.87295-0.48228-0.39237-0.88348 0.09993-0.48158
   4  -9   4  -28.37    8.90  87 0.87743-0.20706-0.37572-0.76430 0.07894 0.42900
   4  -5   7   59.39    9.10  86 0.87734-0.02987-0.37607-0.13611 0.07938 0.90334
   4  -3   7    2.34    7.53  87 0.87712-0.00365-0.37700 0.14284 0.08054 0.94639
   5 -10  -1   42.63    5.44  87 0.87659-0.26041-0.37914-0.98429 0.08323-0.18027
   5 -10   2  -13.66    8.14  88 0.87468-0.13572-0.38636-0.92419 0.09231 0.19441
   5  -5   7   22.89    9.96  87 0.87588 0.12976-0.38190-0.11627 0.08669 0.94821
   5  -4   7   15.18    7.98  86 0.87723 0.13996-0.37653 0.01960 0.07996 0.97530
   6 -10   2   11.62    5.79  86 0.87738 0.01759-0.37591-0.91469 0.07919 0.25592
   7  -8   5   11.52    6.74  86 0.87677 0.32033-0.37840-0.55401 0.08230 0.72748
   7  -2   6    6.79    5.54  86 0.87620 0.43345-0.38064 0.31252 0.08511 0.97937
   8  -7   5   -8.24    4.79  87 0.87704 0.48715-0.37731-0.40902 0.08093 0.79820
   0  -6   2   84.66    7.39  88 0.87281-0.86632-0.39306-0.41565 0.10076 0.02250
   0  -5   4   68.18    7.81  87 0.87457-0.77228-0.38697-0.23720 0.09304 0.30625
   1  -7   4   12.98    9.00  87 0.87489-0.64290-0.38581-0.50979 0.09158 0.31485
   1  -4   6    5.96    8.63  87 0.87472-0.52314-0.38645-0.04503 0.09238 0.63317
   1  -3   6   23.88    8.95  88 0.87315-0.51087-0.39190 0.10010 0.09928 0.65091
   2  -1   6   43.13    6.16  88 0.87277-0.33084-0.39319 0.39563 0.10093 0.73935
   3  -5   7    6.70    9.53  88 0.87468-0.18255-0.38656-0.13940 0.09252 0.84159
   3  -3   7   -7.18    7.51  88 0.87476-0.15803-0.38630 0.13933 0.09219 0.88500
   4  -6   7   47.95   11.35  89 0.87251-0.03671-0.39406-0.26149 0.10204 0.86120
   4   1   5  104.99    2.70  89 0.87036-0.02595-0.40088 0.69788 0.11075 0.74914
   5  -3   7   65.24    7.20  87 0.87486 0.15440-0.38593 0.16994 0.09172 0.98529
   7 -10   2  -15.22    4.53  88 0.87480 0.16929-0.38616-0.89471 0.09201 0.28526
   7  -9   4    4.32    5.17  88 0.87500 0.27118-0.38542-0.71137 0.09108 0.57213
   0  -6   1    8.13    5.92  89 0.87169-0.90504-0.39669-0.42999 0.10559-0.10969
   0  -6   3  130.76    8.76  89 0.87053-0.82322-0.40034-0.38586 0.11026 0.14030
   0  -5  -1    0.15    3.23  90 0.86731-0.97219-0.40970-0.31785 0.12233-0.36069
   3  -9   4   13.73   10.97  89 0.87099-0.35363-0.39890-0.74984 0.10841 0.35357
   4 -10   0   46.68    7.28  89 0.86882-0.36889-0.40543-0.95209 0.11681-0.13483
   4 -10   1   61.17    7.85  88 0.87153-0.33063-0.39720-0.93827 0.10624 0.00299
   4 -10   2  -18.13    8.49  89 0.87025-0.29196-0.40119-0.91306 0.11136 0.11958
   4  -8   6  -11.72   10.88  89 0.87027-0.10008-0.40111-0.55398 0.11126 0.67814
   4  -2   7   29.52    7.47  89 0.87014 0.01420-0.40151 0.31280 0.11177 0.93622
   5 -10   3   23.92    8.02  89 0.87083-0.09173-0.39938-0.88052 0.10904 0.30347
   5  -9   5    3.36    9.17  89 0.87008 0.00318-0.40170-0.70079 0.11200 0.57794
   5  -8   6    2.29    9.63  89 0.87079 0.05614-0.39952-0.54223 0.10922 0.73045
   5  -6   7   10.06    8.52  88 0.87201 0.12000-0.39568-0.24350 0.10429 0.90653
   6 -10   3  -21.20    6.63  89 0.87053 0.06093-0.40031-0.87150 0.11022 0.34864
   6  -5   7  -16.07    8.08  89 0.87044 0.28872-0.40061-0.08696 0.11061 0.97048
   6  -4   7   -4.21    7.81  89 0.87065 0.30258-0.39995 0.05672 0.10977 0.99499
   7  -7   6    8.66    6.52  90 0.86926 0.38444-0.40414-0.37044 0.11515 0.84942
   0  -4   5   -5.09    9.76  91 0.86578-0.71482-0.41375-0.05526 0.12801 0.42829
   0  -3   5   19.23    8.57  90 0.86791-0.70047-0.40791 0.08409 0.12043 0.44994
   1  -2   6  190.50    7.73  90 0.86712-0.49080-0.41012 0.26010 0.12330 0.64795
   2  -8  -2   80.72    4.22  91 0.86382-0.73284-0.41882-0.72403 0.13464-0.46682
   2  -8   5  353.04   12.86  90 0.86792-0.44949-0.40789-0.59460 0.12041 0.43996
   2  -7   6  306.78   11.40  89 0.86899-0.39786-0.40480-0.43680 0.11642 0.59429
   2  -5   7    5.01   11.74  89 0.86890-0.33220-0.40506-0.13238 0.11675 0.76024
   2  -4   7    7.68    8.41  89 0.86933-0.32077-0.40382 0.00560 0.11515 0.78999
   2  -3   7  -16.79    9.21  90 0.86718-0.30912-0.40995 0.15255 0.12307 0.80047
   3  -6   7   25.22   10.12  89 0.86956-0.18941-0.40312-0.26463 0.11425 0.79893
   3  -2   7   -5.06    7.74  90 0.86741-0.14017-0.40930 0.30676 0.12224 0.87546
   4  -9   5   35.48   10.21  89 0.86847-0.15170-0.40633-0.70754 0.11838 0.52005
   5  -2   7   59.88    7.47  90 0.86509 0.17947-0.41557 0.34128 0.13039 0.97028
   6  -9   5   25.18    7.25  90 0.86758 0.16190-0.40884-0.67934 0.12164 0.61901
   6  -8   6   -3.55    7.84  90 0.86688 0.21613-0.41078-0.51677 0.12415 0.76516
   8  -5   6    2.05    4.99  91 0.86578 0.57044-0.41375-0.06337 0.12801 0.93159
   8  -4   6    7.93    4.92  91 0.86623 0.58081-0.41255 0.07720 0.12645 0.95309
   0  -6   0  364.06    5.63  92 0.86171-0.93591-0.42381-0.42559 0.14126-0.27444
   0  -6   4   45.75    9.78  90 0.86501-0.77452-0.41556-0.34796 0.13043 0.24794
   0  -5   5   37.72   10.95  91 0.86389-0.72128-0.41844-0.18740 0.13420 0.39256
   0  -1   4    5.94    5.57  91 0.86398-0.71256-0.41822 0.35625 0.13391 0.35254
   0   0   2  229.52    2.56  90 0.86536-0.78477-0.41464 0.45265 0.12923 0.12645
   1  -8   1    7.25    7.13  91 0.86272-0.76625-0.42136-0.67607 0.13803-0.13664
   1  -8   2   21.07    6.97  90 0.86580-0.72811-0.41349-0.66103 0.12774 0.00256
   1  -8   3   19.81   10.17  91 0.86402-0.68439-0.41813-0.63705 0.13379 0.12260
   1  -7   5  -19.77    9.62  91 0.86583-0.59353-0.41340-0.46245 0.12762 0.40619
   2  -9   1   11.76    7.79  91 0.86448-0.62319-0.41693-0.80641 0.13222-0.10263
   2  -9   2   45.52    7.75  90 0.86576-0.58310-0.41360-0.78967 0.12788 0.03062
   3  -9  -2    4.58    4.70  92 0.86084-0.58539-0.42589-0.84195 0.14400-0.44576
   3  -8   6   -2.82    9.65  91 0.86537-0.25242-0.41463-0.55221 0.12922 0.60960
   4 -10   3   18.58    8.88  90 0.86501-0.24222-0.41557-0.87920 0.13045 0.23152
   4  -7   7  -12.40   10.82  90 0.86571-0.04271-0.41371-0.37827 0.12802 0.80697
   5  -7   7  -18.38    9.23  91 0.86381 0.11378-0.41864-0.36188 0.13446 0.85278
   6  -6   7   27.46    6.74  90 0.86581 0.28150-0.41346-0.21177 0.12770 0.93237
   6  -3   7    8.89    6.62  90 0.86571 0.31884-0.41371 0.21009 0.12802 0.99847
   7 -10   3    3.42    4.85  90 0.86571 0.22527-0.41371-0.84068 0.12802 0.38431
   8  -9   4   -8.81    3.94  91 0.86379 0.43563-0.41870-0.66269 0.13454 0.57604
   0  -2   5  163.01    7.43  92 0.85965-0.68094-0.42858 0.24523 0.14752 0.44539
   1   1  -2  267.53    1.90  91 0.86197-0.77753-0.42311 0.53632 0.14029-0.32415
   2  -9   3   62.42    8.67  91 0.86272-0.54095-0.42128-0.76222 0.13788 0.14692
   2  -6   7    7.02   10.32  92 0.86171-0.33790-0.42375-0.25655 0.14113 0.71968
   3  -9   5   91.24   11.15  92 0.86115-0.29841-0.42508-0.70343 0.14288 0.44602
   3  -7   7   33.81   12.01  92 0.86026-0.19222-0.42718-0.38236 0.14566 0.74564
   3   0   6   32.37    4.47  92 0.85866-0.14686-0.43083 0.59026 0.15050 0.76470
   3   1   5    3.69    2.31  93 0.85759-0.17194-0.43319 0.71549 0.15365 0.65617
   4 -10  -1   -4.20    5.45  91 0.86139-0.40066-0.42451-0.94690 0.14213-0.28859
   5 -10   4   15.53    7.52  92 0.86076-0.04096-0.42599-0.83522 0.14409 0.39497
   8  -8   5    2.63    3.99  92 0.86256 0.49336-0.42169-0.49897 0.13841 0.72470
   8  -6   6   -0.00    4.67  92 0.86069 0.56096-0.42615-0.19781 0.14431 0.88906
   1  -8   4   14.91    9.29  92 0.85815-0.63779-0.43182-0.60354 0.15195 0.23177
   2  -9   0    1.04    6.02  93 0.85536-0.65639-0.43784-0.80774 0.15999-0.25861
   2  -9   4   26.58   10.93  93 0.85537-0.49312-0.43782-0.72898 0.15996 0.25328
   2  -2   7   97.74    8.01  92 0.85753-0.28490-0.43320 0.31603 0.15378 0.79273
   4 -10   4   -1.06    8.84  93 0.85669-0.19295-0.43501-0.83793 0.15620 0.33233
   6 -10   4   10.50    4.87  93 0.85837 0.11803-0.43132-0.81867 0.15128 0.43939
   6  -7   7   -6.18    7.22  94 0.85434 0.28453-0.43997-0.32870 0.16287 0.88136
   7  -9   5   -2.37    4.30  93 0.85834 0.32221-0.43139-0.65096 0.15138 0.63195
   0  -7   2    1.46    7.59  95 0.85088-0.85920-0.44687-0.50499 0.17217-0.07133
   0  -7   3  146.52    9.19  94 0.85298-0.81670-0.44271-0.48514 0.16654 0.06193
   0  -6   5    5.26    9.54  94 0.85378-0.72464-0.44110-0.30704 0.16437 0.34142
   1  -8   0   -2.65    5.27  94 0.85268-0.79596-0.44332-0.67192 0.16736-0.29327
   1  -7   6   19.96   12.64  94 0.85260-0.53816-0.44349-0.41186 0.16759 0.49338
   1  -5   7   36.48   12.02  94 0.85167-0.47244-0.44532-0.10948 0.17006 0.66461
   1  -4   7    1.53    8.77  93 0.85435-0.46167-0.43994 0.02835 0.16279 0.69092
   2  -8   6  -18.43   10.15  94 0.85406-0.40063-0.44052-0.54315 0.16358 0.52090
   3 -10   1   17.25    7.03  94 0.85142-0.46744-0.44580-0.90780 0.17072-0.11338
   3 -10   2    0.85    6.83  94 0.85419-0.42866-0.44027-0.89133 0.16324 0.02193
   3 -10   3   32.92    8.68  95 0.85063-0.38488-0.44733-0.86462 0.17280 0.14121
   4  -9   6   46.80    9.56  93 0.85322-0.09638-0.44224-0.65042 0.16591 0.59852
   4  -5   8   82.26    9.80  94 0.85260 0.03688-0.44349-0.04848 0.16758 0.94181
   4  -4   8    1.55    9.02  94 0.85261 0.04831-0.44345 0.09317 0.16754 0.96062
   5  -9   6    5.07    7.93  93 0.85408 0.05881-0.44049-0.63823 0.16354 0.65044
   7  -8   6   22.27    4.63  93 0.85498 0.38465-0.43862-0.47415 0.16102 0.77993
   7  -5   7   11.20    5.27  94 0.85327 0.46524-0.44214-0.02804 0.16576 0.96844
   7  -4   7   -3.25    5.13  94 0.85116 0.47901-0.44632 0.11745 0.17142 0.98400
   0  -7   4  -12.59    9.96  96 0.84542-0.77232-0.45679-0.45399 0.18585 0.17554
   0  -4  -2   -5.17    1.40 102 0.81215-0.94906-0.50469-0.10382 0.25437-0.60201
   0  -4   6   -9.58    8.67  95 0.85026-0.65680-0.44786 0.00136 0.17364 0.50251
   1  -8   5    9.69   11.83  95 0.84802-0.58743-0.45207-0.56440 0.17937 0.33220
   1  -3   7  -18.90    7.62  95 0.84966-0.44525-0.44900 0.17626 0.17519 0.70032
   1  -1   6  325.74    6.42  95 0.84781-0.45803-0.45247 0.44374 0.17993 0.61372
   1   0   5    9.82    4.23  95 0.84793-0.48721-0.45224 0.56525 0.17961 0.50764
   2  -7   7   57.55   10.57  94 0.85082-0.34113-0.44678-0.37498 0.17216 0.66658
   3  -5   8    8.73    9.09  94 0.85049-0.11729-0.44742-0.05801 0.17303 0.88723
   3  -4   8   -1.18    8.43  95 0.84980-0.10387-0.44873 0.08436 0.17482 0.90797
   3  -1   7  -10.11    6.48  95 0.84557-0.10316-0.45651 0.49576 0.18547 0.83495
   4  -8   7    1.88    8.48  94 0.85060-0.03959-0.44720-0.48795 0.17273 0.74429
   4  -6   8    6.61    9.86  95 0.84746 0.02980-0.45310-0.18000 0.18079 0.90828
   4  -1   7   18.60    5.78  95 0.84762 0.05069-0.45281 0.50503 0.18039 0.89055
   5  -8   7    1.88    6.93  95 0.84873 0.11902-0.45075-0.47111 0.17758 0.79017
   5  -5   8   74.10    8.44  95 0.84633 0.19962-0.45515-0.02286 0.18360 0.97763
   7 -10   4    7.24    4.34  95 0.84925 0.28257-0.44978-0.78506 0.17624 0.46393
   7  -6   7   -2.53    5.23  94 0.84996 0.45306-0.44843-0.16209 0.17441 0.93399
  -1  -4   2   43.46    6.36  96 0.84289-0.96806-0.46122-0.07711 0.19205-0.07435
  -1  -4   3  279.24    7.71  96 0.84384-0.92747-0.45958-0.06034 0.18978 0.05549
  -1  -3   2  117.47    5.99  96 0.84398-0.95644-0.45934 0.06156 0.18944-0.05133
  -1  -3   3   41.09    7.13  96 0.84284-0.91444-0.46130 0.08340 0.19215 0.07450
   0  -7   1    6.50    6.08  97 0.84101-0.89325-0.46439-0.50929 0.19645-0.22466
   0  -3   6   21.40    7.24  95 0.84666-0.64130-0.45459 0.14909 0.18289 0.51411
   0   0   3  517.50    3.80  96 0.84379-0.72177-0.45968 0.51745 0.18990 0.19216
   1  -7  -2   -5.98    2.94 100 0.82468-0.84265-0.48883-0.53114 0.23115-0.59425
   1  -6   7   43.86   10.52  95 0.84549-0.47991-0.45669-0.23597 0.18578 0.62407
   2  -9   5    8.02    9.62  95 0.84556-0.44132-0.45657-0.68780 0.18562 0.35443
   3 -10   0   -5.93    6.01  97 0.84092-0.50370-0.46454-0.90509 0.19666-0.27386
   3 -10   4    6.74    9.21  96 0.84252-0.33516-0.46186-0.83186 0.19292 0.24834
   3  -9   6    3.64    8.49  95 0.84517-0.24352-0.45726-0.65225 0.18657 0.53038
   3  -8   7   -0.10    9.06  95 0.84592-0.19102-0.45593-0.49303 0.18473 0.68215
   3  -6   8  -11.38    9.65  96 0.84540-0.12711-0.45684-0.19401 0.18599 0.85053
   3  -3   8    6.92    8.76  97 0.84162-0.08309-0.46337 0.24059 0.19502 0.91074
   4  -3   8    4.20    7.76  96 0.84181 0.07334-0.46305 0.25407 0.19458 0.96171
   5 -10   5   25.40    7.00  95 0.84530 0.01408-0.45702-0.78460 0.18624 0.48010
   5  -6   8   18.22    8.30  97 0.84143 0.19300-0.46369-0.15586 0.19548 0.94599
   5  -4   8   54.61    7.88  96 0.84363 0.21554-0.45995 0.12282 0.19029 0.99364
   6  -9   6   17.26    4.95  96 0.84578 0.22432-0.45619-0.61414 0.18509 0.68308
   0  -7   5   17.64   11.27  97 0.83717-0.72142-0.47051-0.41995 0.20479 0.27955
   2  -5   8  217.69   10.09  96 0.84135-0.26425-0.46373-0.05522 0.19529 0.81580
   2  -4   8  -26.36    8.95  97 0.84069-0.25251-0.46483 0.08341 0.19683 0.83520
   2   0   6   16.27    4.79  98 0.83629-0.28008-0.47189 0.61752 0.20673 0.66007
   4 -10   5  131.35    7.32  96 0.84134-0.13797-0.46374-0.79220 0.19531 0.42469
   4  -7   8   -9.43    9.53  98 0.83551 0.03034-0.47311-0.30312 0.20845 0.86315
   5 -11   1    7.54    5.22  97 0.83648-0.15108-0.47160-0.99195 0.20631-0.07133
   5 -11   2   18.51    5.02  97 0.83848-0.11347-0.46844-0.97142 0.20187 0.06137
   6 -11   2    6.81    4.64  96 0.84019 0.04142-0.46565-0.96223 0.19798 0.11506
   6 -10   5   -1.82    5.20  96 0.84056 0.17523-0.46504-0.76210 0.19712 0.51921
   6  -8   7   12.28    5.94  97 0.83944 0.28417-0.46688-0.44023 0.19969 0.81704
   7  -7   7    6.15    4.94  97 0.83665 0.45577-0.47133-0.28084 0.20594 0.88347
  -1  -5   2   50.11    6.65  98 0.83183-0.96907-0.47842-0.20127 0.21602-0.12112
  -1  -5   3  497.80    7.05  97 0.83529-0.93181-0.47320-0.18869 0.20863 0.01306
  -1  -4   4    1.58    7.07  98 0.83531-0.88107-0.47317-0.02792 0.20858 0.16500
  -1  -3   1    7.01    4.39  98 0.83050-0.98380-0.48038 0.06345 0.21881-0.20652
  -1  -3   4   17.53    6.50  97 0.83531-0.86367-0.47317 0.11848 0.20858 0.18364
   0  -2   6   91.90    7.97  98 0.83321-0.61243-0.47636 0.31268 0.21310 0.50681
   0  -1   5  -18.46    5.07  98 0.83540-0.64213-0.47303 0.43139 0.20839 0.40948
   1  -9   3   96.59    9.61  98 0.83284-0.66680-0.47692-0.71892 0.21389 0.02214
   1  -8   6  366.67   12.90  98 0.83390-0.53124-0.47532-0.52090 0.21163 0.42676
   1  -7   7  198.25   13.39  98 0.83342-0.47834-0.47605-0.35863 0.21265 0.57435
   1  -2   7  115.41    7.90  97 0.83428-0.41685-0.47475 0.34353 0.21081 0.68902
   2  -9  -1   19.60    4.68  98 0.83084-0.67294-0.47988-0.78268 0.21811-0.44317
[truncated: 1,177,286 more chars]
